# Supplementary material for: Fail-tests of DNA methylation clocks, and development of a noise barometer for measuring epigenetic pressure of aging and disease
Source: Aging (Albany NY). 2023 Sep 12;15(17):8552–75. doi: 10.18632/aging.205046 (PMC10522373; doi:10.18632/aging.205046)
Supplement: Supplementary Data Excel [file aging-15-205046-s002.xlsx]

## Sheet: 460 Cyt annotation
Inc.	Unnamed: 2	Unnamed: 3	Unnamed: 4	Unnamed: 5	Unnamed: 6	Unnamed: 7	Unnamed: 8	Unnamed: 9	Unnamed: 10	Unnamed: 11	Unnamed: 12	Unnamed: 13	Unnamed: 14	Unnamed: 15	Unnamed: 16	Unnamed: 17	Unnamed: 18	Unnamed: 19	Unnamed: 20	Unnamed: 21	Unnamed: 22	Unnamed: 23	Unnamed: 24	Unnamed: 25	Unnamed: 26	Unnamed: 27	Unnamed: 28	Unnamed: 29	Unnamed: 30	Unnamed: 31	Unnamed: 32
cg05639522	16771425	ACCTAAAACAATACAATCACCACTACCTCTACCAATTCATATATAAAACA	69685305	ACCTAAAACGATACAATCACCGCTACCTCTACCAATTCGTATATAAAACG	I	C	Grn	CCGCGTACACGTACCTGGGGCGGTGCAGTCACCGCTGCCTCTGCCAGTTCGTGTGTGGGA[CG]CCGGCCATCACCGCATTTCCGCGTGGACGCCGGCAGGGTGGAACGCCTGGCTTTCCCCGG	37	1	247681581	ACCTGGGGCGGTGCAGTCACCGCTGCCTCTGCCAGTTCGTGTGTGGGACG	1	245748204	R								chr1:247681399-247681951	Island				1:245747809-245748574
cg06649280	11733470	TCCATATCTCCAACCTACTAAACAACAACAACAAATAAAACTATCCACCA	47770469	TCCGTATCTCCAACCTACTAAACAACAACGACAAATAAAACTATCCGCCG	I	C	Grn	GGGAGGGGCCATTCCGTGTCTCCAGCCTGCTGGGCAGCAGCGACAGGTGGAGCTGTCCGC[CG]CGTCCCCCCACACTGCTCCTCCTCTCAGCTGGGTCCTTTCTGCCCAACCCAAGCCCCTGT	37	1	24438781	CGGCGGACAGCTCCACCTGTCGCTGCTGCCCAGCAGGCTGGAGACACGGA	1	24311368	R					MYOM3	NM_152372	TSS200						1:24311290-24311555	1:24438649-24439348	Unclassified	TRUE
cg07367222	45783494	TAAAATAAAATAACTCCTTCCAAAATCCTTTCACCCACCCCATCTATCCA	74681426	TAAAATAAAATAACTCCTTCCGAAATCCTTTCACCCACCCCATCTATCCG	I	A	Red	GAGAGGCTGGTGCAGGGAGAGGGCTTGGCCCTGGGGTTCTCACCCCCAGGGTCCCATCAC[CG]GACAGATGGGGTGGGTGAAAGGACCTCGGAAGGAGTCATCCCATTTCACAGGTGAGGAAA	37	1	3053584	CGGACAGATGGGGTGGGTGAAAGGACCTCGGAAGGAGTCATCCCATTTCA	1	3043444	F		rs75198611			PRDM16;PRDM16	NM_022114;NM_199454	Body;Body	chr1:3056541-3056772	N_Shelf					1:3053264-3053698	Unclassified_Cell_type_specific
cg08137948	10808499	CAAACAAAAAAACTAAAAAAACCCTAACATTAACCCCATAAACCTAAACA	51624330	CAAACGAAAAAACTAAAAAAACCCTAACGTTAACCCCGTAAACCTAAACG	I	C	Grn	TTGGATCCGAGGCAGACGAGGAAGCTGAGAAAACCCTGGCGTTGACCCCGTGGACCTGGG[CG]CCCCGGGAAGGCCAGCGCTTGGTCCAGGCAGGCGGGGCCTGTGCGGTGACCACCCTGGTC	37	1	236686804	CAGACGAGGAAGCTGAGAAAACCCTGGCGTTGACCCCGTGGACCTGGGCG	1	234753427	R					LGALS8;LGALS8;LGALS8;LGALS8;LGALS8;LGALS8	NM_201543;NM_201543;NM_006499;NM_201545;NM_201544;NM_006499	5'UTR;1stExon;5'UTR;5'UTR;TSS1500;1stExon	chr1:236687071-236687608	N_Shore				1:234753221-234754607	1:236686783-236688360	Promoter_Associated	TRUE
cg13446070	23700336	AAAACAAAAAACTAAAAACCCCCAAACACTATCCAAACCAATACCTACCA	58731468	AAAACAAAAAACTAAAAACCCCCGAACACTATCCAAACCAATACCTACCG	I	T	Red	TGTGGCCGCCCGCCGCCGGTCCACGGACACCGACTTCCTCTTACACACCTTACACGCCCA[CG]GCAGGCACTGGCCTGGACAGTGCTCGGGGGTCCCCAGCCCCTTGTCCTCAAGGGGCCCTG	37	1	203054889	CGGCAGGCACTGGCCTGGACAGTGCTCGGGGGTCCCCAGCCCCTTGTCCT	1	201321512	F					MYOG	NM_002479	1stExon						1:201321409-201321600
cg23603891	40636487	TAAACCAAAAAATAAACACACCCAAACAAAAAACAAAAAATCCTAAAACA	41773301	TAAACCGAAAAATAAACGCGCCCGAACGAAAAACAAAAAATCCTAAAACG	I	C	Grn	CGCGGAACCCCCTGGTGGGTTCCTCCCGCAGGAGCACCCCGTCCCCCTGCCCCCGCTCCG[CG]CCCCAGGACCCTCTGCCCTCCGCCCGGGCGCGCTCACCTCCCGGCCCAGCAGCGGCAGGA	37	1	6479628	CGCCCCAGGACCCTCTGCCCTCCGCCCGGGCGCGCTCACCTCCCGGCCCA	1	6402215	F					HES2	NM_019089	Body	chr1:6479057-6480938	Island	high-CpG:6402163-6402567		TRUE	1:6401526-6403517
cg26837773	17714439	AACCAACACTCTACAACCTTCATATCTAACTCTTTCCACTTAACATAACA	14664350	AACCAACACTCTACGACCTTCGTATCTAACTCTTTCCACTTAACATAACG	I	T	Red	TGCGGTGAATGGAACCAACACTCTGCGGCCTTCGTGTCTGGCTCTTTCCACTTAGCATAA[CG]TTTTCAAGGTTCTTTCACATGAATCAGTGCCTCAGTCCTTTTCATGGCTGCATAATATTC	37	1	947091	CGTTATGCTAAGTGGAAAGAGCCAGACACGAAGGCCGCAGAGTGTTGGTT	1	936954	R								chr1:948670-948894	N_Shore		CDMR
cg09606941	66656397	AAAATAACCAATACACAACACTTTCTTCCAACACCTAACACTTAATTTCA	53743366	GAAATAACCGATACGCAACGCTTTCTTCCAACACCTAACGCTTAATTTCG	I	C	Grn	GGGGCTGGGAAAAGGAGGAAGGCGCGTGGAGCCGGCGGGGCGGCGTAGGGAGATTCTGCG[CG]AAACTAAGCGTCAGGTGCTGGAAGAAAGCGCTGCGCACCGGCTACCCCGCAGTTCAGGGA	37	2	190445880	GGGGTAGCCGGTGCGCAGCGCTTTCTTCCAGCACCTGACGCTTAGTTTCG	2	190154125	F					SLC40A1	NM_014585	TSS1500	chr2:190445459-190445983	Island			TRUE	2:190153683-190154226			TRUE
cg10859133	34634503	ACCCTAACATCTTCATACAAAAAAAAATAACACTCAAAATCAACCTACCA	66664439	ACCCTAACATCTTCATACGAAAAAAAATAACGCTCAAAATCAACCTACCG	I	A	Red	CCAAGACTCGCTACCCTGACATCTTCATGCGGGAGGAGGTGGCGCTCAAGATCAACCTGC[CG]GAGTCTAGAGTCCAGGTGCGCACTCCCCGGGCTCCAGGGTCTGGGTAGGGGAGCTGAGGC	37	2	63281317	CGGCAGGTTGATCTTGAGCGCCACCTCCTCCCGCATGAAGATGTCAGGGT	2	63134821	R					OTX1	NM_014562	Body	chr2:63281034-63281347	Island		DMR		2:63134302-63135304	2:63280765-63281929	Unclassified
cg17942639	30646466	ACACTAAAAAAACAAATACCAAACTAAACACTCACTCACAAACTAACACA	72799385	ACGCTAAAAAAACAAATACCGAACTAAACGCTCACTCGCAAACTAACGCG	I	T	Red	GGGAAGGCGGCGGCGCTGGAGGAACAGGTGCCGGGCTGAGCGCTCACTCGCAGACTAGCG[CG]TGCGAGGGCTCCTCGCTCTGCTTTCGAAAGTCCCTGGGCCGTGGGAGTTTCCCAGGAGCC	37	2	154335184	CGCGCTAGTCTGCGAGTGAGCGCTCAGCCCGGCACCTGTTCCTCCAGCGC	2	154043430	R					RPRM;RPRM	NM_019845;NM_019845	1stExon;5'UTR	chr2:154334449-154335458	Island		DMR	TRUE	2:154042488-154043953	2:154334733-154335809	Unclassified	TRUE
cg22860848	36801313	CCTACAAACACAACTCCTCAAAAAACCCAAACCAATAACAAATCTTAACA	36732317	CCTACAAACACAACTCCTCGAAAAACCCAAACCGATAACAAATCTTAACG	I	T	Red	CCCCTCAGGTGTCCTGCAGGCACAGCTCCTCGGGGGGCCCAGGCCGATGGCAGGTCTTAA[CG]TGTCCCTCTCCTTCTTCTTTGCCACCTTCGCCCTCTGTGAGGCGGCCAGGCGGGCCTCCA	37	2	241631345	CCTGCAGGCACAGCTCCTCGGGGGGCCCAGGCCGATGGCAGGTCTTAACG	2	241280018	R					AQP12A	NM_198998	1stExon
cg03637769	31719455	TTCTTAATCTTCTCTCTTAAAAAACCAACAACTAAACCAACTACTCCCCA	24706345	TTCTTAATCTTCTCTCTTAAAAAACCGACGACTAAACCAACTACTCCCCG	I	T	Red	TGGAGAACCCAGAGAGGGTGGGGAGATGGAATCCCGGCGAGCCAGCGCTGGCAGGGACCA[CG]GGGAGCAGCTGGTCCAGCCGCCGGTTTTCCAAGAGAGAAGACTAAGAAGTGAGTCACTTG	37	3	195870092	CGGGGAGCAGCTGGTCCAGCCGCCGGTTTTCCAAGAGAGAAGACTAAGAA	3	197354489	F		rs67293537										TRUE	3:197354390-197354672			TRUE
cg08929133	49733496	CTAAATTCAAATCTAACACCACAAACTAAAATACTACACAAACAACTACA	24732460	CTAAATTCGAATCTAACACCGCAAACTAAAATACTACACGAACAACTACG	I	A	Red	CAGAAAGACACACTGTAATTCTGCTGAGTCTGCAAAGAATGTTCAAGGGGTATTTGTGTC[CG]TAGCTGCTCGTGCAGCATCTCAGCCTGCGGTGTCAGACTCGAACCCAGAGCTGTGTCAAA	37	3	186330026	CTGGGTTCGAGTCTGACACCGCAGGCTGAGATGCTGCACGAGCAGCTACG	3	187812720	F					AHSG	NM_001622	TSS1500
cg16239482	50702387	AACCCACACAAAAACTAAAAAAACTAAACAAATAATAATTCAAAACACCA	16735408	AACCCGCGCGAAAACTAAAAAAACTAAACAAATAATAATTCAAAACGCCG	I	A	Red	TTTATTACCCTAGTCTGCCTGCGTGTACAGAATGAAGGGTGCACTGTTTTATATAGAGTT[CG]GCGCTTTGAACTATCATTTGCCTAGCTCTCCCAGCTTCCGCGCGGGCCACGGCTCCGGGC	37	3	181437145	CGGCGCTTTGAACTATCATTTGCCTAGCTCTCCCAGCTTCCGCGCGGGCC	3	182919839	F		rs79705535			SOX2OT	NR_004053	Body	chr3:181437184-181437478	N_Shore				3:182919839-182920367
cg05322332	39772402	TATAACTTAATACATAAAACACATACAACCTCCTAACACCAACCCCCACA	51670497	TATAACTTAATACATAAAACGCATACAACCTCCTAACACCAACCCCCACG	I	A	Red	CAGGCTCTACCCTGTGACTTGGTGCATAGGGCGCATGCAACCTCCTGGCACCAGCCCCCA[CG]AGGGTTGGGGATGACAGCATTCATTGGGATGGAGTGGAGGAGCTGGTAGCTGAGAACTCA	37	4	79176098	CGTGGGGGCTGGTGCCAGGAGGTTGCATGCGCCCTATGCACCAAGTCACA	4	79395122	R		rs10010118			FRAS1;FRAS1	NM_025074;NM_001166133	Body;Body
cg17082366	43632386	CAAACACCTCAAAAAACCAAAACAAACAAATCACTCAAAATCAAAAACCA	55654463	CGAACACCTCGAAAAACCGAAACAAACAAATCACTCAAAATCAAAAACCG	I	A	Red	GACTGGTTTTTGTATTTTTTGGTGGAGATGGGGTTTCGCTGTGTTGGCCGGGCTGGTCTC[CG]GCTCCTGACCTTGAGTGATCTGCCTGCCTCGGCCTCCCGAGGTGCCCGGATTGCAGACAG	37	4	110524473	CGGCTCCTGACCTTGAGTGATCTGCCTGCCTCGGCCTCCCGAGGTGCCCG	4	110743922	F		rs197210			CCDC109B	NM_017918	Body						4:110743825-110744479
cg24385450	12729448	ATACAAATAACTAAAAAACACCATAATACAAATAACTAAAAAAAACACCA	47724315	ATACAAATAACTAAAAAACGCCGTAATACAAATAACTAAAAAAAACGCCG	I	T	Red	GCCACGGCGCCCCCTCTAGTCACCTGGACCACGGCGCCCCCTCTAGTCACCTGCACGCCA[CG]GCGCCCCCTCTAGTCACCTGCACCACGGCGCCCTCTAGTCACCTGCACCACAGCGCCCCC	37	4	2957128	CGGCGCCCCCTCTAGTCACCTGCACCACGGCGCCCTCTAGTCACCTGCAC	4	2926926	F	rs72320657	rs56317357			NOP14	NM_003703	Body	chr4:2956706-2957325	Island				4:2926529-2927236	4:2956291-2957793	Promoter_Associated
cg24979233	17629487	CTAAAAAACAATACACAAATTCACCAATCAAAACACAAACCAAAACAACA	25632414	CTAAAAAACGATACGCGAATTCACCGATCAAAACACAAACCGAAACAACG	I	C	Grn	CTGCAGGATACAGAACCTTGCCCACCCCAAGGAGCCCCCACCCCCGCCCCGGCCCCCTCG[CG]CTGCTCCGGCCTGTGCTCTGACCGGTGAACCCGCGCATCGCCCCCCAGACCGTCCACACG	37	4	1800284	CTGGGGGGCGATGCGCGGGTTCACCGGTCAGAGCACAGGCCGGAGCAGCG	4	1770082	F	rs3135865	rs13121632			FGFR3;FGFR3;FGFR3	NM_001163213;NM_000142;NM_022965	Body;Body;Body	chr4:1800144-1800351	Island				4:1769989-1770247
cg25186874	53803301	CACAAAAAAAAACCTAAACCCTTAAACTAAAATTTCCAACTTCATCTACA	19717323	CACAAAAAAAAACCTAAACCCTTAAACTAAAATTTCCAACTTCGTCTACG	I	A	Red	GAATAATTCCCCCAGGATGTTCTTCTGATGTAGCGAATGAGAGGACGAGCCTATTTGTCT[CG]TAGACGAAGCTGGAAATTTCAGCTCAAGGGTTCAGGCTCCTCCCTGTGCATCCTTTAGAA	37	4	141540407	CACAGGGAGGAGCCTGAACCCTTGAGCTGAAATTTCCAGCTTCGTCTACG	4	141759857	F		rs76984798
cg02084828	69718439	ATACATTTCCAACCACTTACTTAAACCAATCTAAAACAAAAAAACTCCCA	57745387	ATACATTTCCAACCGCTTACTTAAACCGATCTAAAACAAAAAAACTCCCG	I	A	Red	GGAAGAGGAGTGGTGCATTTCCAGCCGCTTGCTTAGACCGGTCTGAGACAGGGAGGCTCC[CG]GGGGACCCAGGGAGGCCTCCCGCTGTGGAACTTTGGGGGGCAGGCTGTCCAGGTTCTCCA	37	5	115782729	GTGCATTTCCAGCCGCTTGCTTAGACCGGTCTGAGACAGGGAGGCTCCCG	5	115810628	R					SEMA6A	NM_020796	Body	chr5:115783075-115783425	N_Shore				5:115810007-115810651
cg22132026	20685309	AAAAACTCAATAAAAAACCAAATAATCAAAAAAAACTCAATAAAAAACCA	61658438	AAAAACTCGATAAAAAACCGAATAATCAAAAAAAACTCGATAAAAAACCG	I	A	Red	TGGGTGGTCGGGGAAGGCTCGATGAGAGGCCGGGTGGTCAGGGAAGGCTCGATGAGAGGC[CG]GGTGGTCAGGGAAGCCTCGATGAGAGGCCGGGTGGTCGGGGAAGCCTCGATGAGAGGCCG	37	5	83590	CGGCCTCTCATCGAGCCTTCCCTGACCACCCGGCCTCTCATCGAGCCTTC	5	136590	R								chr5:83428-85530	Island				5:136440-138530
cg24756698	22755334	CCACCCCACTCAAAAAAAACTAAATTCCACTAAAATTAAAAACAAACCCA	31609436	CCGCCCCACTCAAAAAAAACTAAATTCCACTAAAATTAAAAACAAACCCG	I	A	Red	AAACAAAAACGTCCGGTGGGTTTTTCCCGGGGAAGAATTCAGATAGAAGAGAAGTGGATT[CG]GGTCTGCTTTCAATCCCAGTGGAATTCAGCCTCCTCTGAGTGGGGCGGTTGAGGGTGCAG	37	5	1020022	CGGGTCTGCTTTCAATCCCAGTGGAATTCAGCCTCCTCTGAGTGGGGCGG	5	1073022	F	rs35855881				NKD2	NM_033120	Body						5:1073022-1073235
cg00346623	47697349	TCTTAACCATAATTCTACCACCAATTAACCAAACATCCTTAAACAAAACA	29663318	TCTTAACCATAATTCTACCGCCGATTAACCGAACATCCTTAAACAAAACG	I	T	Red	AAGCCTTGTTTTAGGAATGGCATCTTACAGACGTGGAGACAGAGGCACAGAGAGAGTAAA[CG]TCTTGCCCAAGGATGCTCGGCTAATCGGCGGCAGAACCATGGCTAAGAGCCAGGCCTCCT	37	6	38202492	CGTCTTGCCCAAGGATGCTCGGCTAATCGGCGGCAGAACCATGGCTAAGA	6	38310470	F					BTBD9;BTBD9;BTBD9	NM_001099272;NM_152733;NM_052893	Body;Body;Body					TRUE
cg00512454	65673479	CACACCTCTACCCATCTAAAAACCTAAATAAAAAATAACTCAACCCCACA	73626458	CACGCCTCTACCCATCTAAAAACCTAAATAAAAAATAACTCAACCCCACG	I	T	Red	CAGGACTCCTGTCTCCTAGCCTCATGGGATACAGGGCAAAGAGCAGGAGCAGTGTGGGAA[CG]TGGGGCTGAGCCACTCCTTACTCAGGCCTCCAGATGGGCAGAGGCGTGGGCACCGAGGGC	37	6	36709214	CGTGGGGCTGAGCCACTCCTTACTCAGGCCTCCAGATGGGCAGAGGCGTG	6	36817192	F					CPNE5	NM_020939	3'UTR
cg00694180	13795470	ATAAACCATTCAACAAAAAATTAACTTTAAACCAATCACAATAACTCACA	50684428	ATAAACCGTTCGACAAAAAATTAACTTTAAACCGATCGCAATAACTCACG	I	C	Grn	GAACTCCTGCCCTCAATGTCATCTGCCCACTTGGGCCTCCCAAAGTGCTGGGATTACAGG[CG]TGAGCCACTGCGACCGGCCCAAAGTTAACCTTCTGTCGAACGGTTTATATCTGGAAAGGT	37	6	33243375	ATAAACCGTTCGACAGAAGGTTAACTTTGGGCCGGTCGCAGTGGCTCACG	6	33351353	F		rs72654478			RPS18	NM_022551	Body	chr6:33244677-33245554	N_Shore
cg05068156	38777407	CTTCTATAACACCACACTCTTTATCTATATTCACCCTAAAACCAACTACA	72723487	CTTCTATAACACCGCACTCTTTATCTATATTCGCCCTAAAACCAACTACG	I	A	Red	CATGGTCTCCCTCTTCTATGGCACCGCACTCTTTATCTATATTCGCCCTAAGGCCAGCTA[CG]ATCCGGCCACTGACCCTCTGGTGTCCCTCTTCTATGCTGTGGTCACCCCCATCCTCAACC	37	6	29408587	CTTCTATGGCACCGCACTCTTTATCTATATTCGCCCTAAGGCCAGCTACG	6	29516566	R					OR10C1	NM_013941	1stExon
cg05699123	14647469	AACTTTAACAATATAAAAAAAAACCCAACTAAATTACCACTACTAACTCA	48731413	AACTTTAACAATATAAAAAAAAACCCGACTAAATTACCACTACTAACTCG	I	A	Red	CGGCTCTACCAATCAGCAGGATGTGGGTGGGGCCAGATAAGAGAATAAAAGCAGGCTGCC[CG]AGCCAGCAGTGGCAACCCAGTCGGGTTCTCTTCCACACTGCTAAAGCTTTGTTCTTTTGC	37	6	31164176	AGCTTTAGCAGTGTGGAAGAGAACCCGACTGGGTTGCCACTGCTGGCTCG	6	31272155	F	rs28749552				HCG27	NR_026791	TSS1500	chr6:31165412-31165923	N_Shore
cg16739976	45740471	CATAAACAAAACAACTTCAACAACAAAAAAACTAAAAACAACCAACCACA	44767428	CATAAACAAAACAACTTCAACAACAAAAAAACTAAAAACAACCAACCGCG	I	T	Red	GGCCTGGGTGGGCATGGGCAGGGCAGCTTCAGCAGCAGGGGGACTGAGGGCAGCCAACCG[CG]TAGCCCATGCTGCTACCCTCTCCCACCTCCTTGTCACTCGGGCCAAGCACAGTTGCCCGC	37	6	34101401	CGCGGTTGGCTGCCCTCAGTCCCCCTGCTGCTGAAGCTGCCCTGCCCATG	6	34209379	R					GRM4;GRM4	NM_000841;NM_000841	1stExon;5'UTR
cg25412448	72647427	TAACAAAAAAAATAACTAACCCTCCACTTCTACCCTATACTCTACACCCA	56669375	TAACAAAAAAAATAACTAACCCTCCGCTTCTACCCTATACTCTACACCCG	I	T	Red	CAGTGGCACCCCAAGCTCACTGGAAGCCTTGGGGACAAGGGAGGATCCAGGAGAAAGGGA[CG]GGTGTAGAGCACAGGGCAGAAGCGGAGGGCCAGCCACTTCTCCTGCTACCACCAGGGCCA	37	6	163675048	CGGGTGTAGAGCACAGGGCAGAAGCGGAGGGCCAGCCACTTCTCCTGCTA	6	163595038	F					PACRG;PACRG;PACRG	NM_152410;NM_001080378;NM_001080379	Body;Body;Body					TRUE
cg26570901	71802374	ATAAAAACCAAACACCTACTAAACAAACCCAAATCTAAAATCTAACCTCA	49785337	ATAAAAACCGAACGCCTACTAAACAAACCCGAATCTAAAATCTAACCTCG	I	C	Grn	GACAGGAGAAGACTGCCAAGCCACCACCGGTCCTGCGACATATTCACCAGCTGCCGGCGG[CG]AGGTCAGACCCCAGATTCGGGTTTGCCCAGCAGGCGCTCGGCTTCCATGCTCGCTCTCCA	37	6	30419576	ATGGAAGCCGAGCGCCTGCTGGGCAAACCCGAATCTGGGGTCTGACCTCG	6	30527555	F	rs1078792	rs9295885						chr6:30418844-30419630	Island				6:30526824-30527666	6:30419361-30419818	Unclassified_Cell_type_specific
cg00830401	26694359	TTAAACCCAATATAACTATCTCCAAAATCCACACCCTTCCCTACAAAACA	11689376	TTAAACCCGATATAACTATCTCCAAAATCCACGCCCTTCCCTACAAAACG	I	T	Red	CTGGAAGGTATTTTGCCTTCTTCATTGCCCCAAATTAGGATGTAGGGGGAGACGAAAAGA[CG]TCCTGCAGGGAAGGGCGTGGATTTTGGAGACAGCCACACCGGGTTCAATTGGCCTCGCCG	37	7	151553558	CGTCCTGCAGGGAAGGGCGTGGATTTTGGAGACAGCCACACCGGGTTCAA	7	151184491	F					PRKAG2	NM_016203	Body						7:151184350-151184612
cg09424415	33747508	TAAAACCAAAACCAAAATCACAACCATAAATAAAACCAAAACCAAAACCA	34700436	TAAAACCGAAACCGAAATCGCGACCGTAAATAAAACCGAAACCAAAACCG	I	C	Grn	CACGGCCGTGGATGGGGCCGGGGCCGGGGTCGCGGCCGTGGATGGGGCCGGGGCCAAGAC[CG]CGGAGTTCGCGGAGGCAAGGCCCAGGATAAGGAGCGGATGCCCGTCACCAAGCTGGACGG	37	7	23530240	TGGGGCCGGGGCCGGGGTCGCGGCCGTGGATGGGGCCGGGGCCAAGACCG	7	23496765	R	rs11552368				RPS2P32	NR_026676	Body	chr7:23530434-23530690	N_Shore				7:23496559-23497159	7:23529745-23530568	Promoter_Associated_Cell_type_specific	TRUE
cg10592734	69736398	CTACCTTCCCATTCTACCCTAATTCTCCCTTATAACCACTTTAAAAATCA	31789480	CTACCTTCCCGTTCTACCCTAATTCTCCCTTATAACCACTTTAAAAATCG	I	A	Red	ATAGAGGACATCCTGCCTTCCCGTTCTGCCCTGGTTCTCCCTTGTGACCACTTTAAAAAT[CG]ACTCATTTGGCCAGGTGTGGTGGCTTATGCCTTTAATCCCAGCACTTTGGGAGGCCAAGG	37	7	139570596	CTGCCTTCCCGTTCTGCCCTGGTTCTCCCTTGTGACCACTTTAAAAATCG	7	139217065	R					TBXAS1;TBXAS1;TBXAS1;TBXAS1;TBXAS1;TBXAS1	NM_001166253;NR_029394;NM_001130966;NM_001061;NM_030984;NM_001166254	Body;Body;Body;Body;Body;5'UTR					TRUE
cg14391382	13656425	TAAAAAAAAAATCTAACAAAACATCACTACCCAACCAAATAAAACAAACA	30785369	TAAAAAAAAAATCTAACGAAACATCGCTACCCAACCGAATAAAACAAACG	I	T	Red	CGGGAAGGTCCCTGAGGGAAGGATCTGGCGAAACATCGCTGCCCAGCCGGGTGGAGCAGG[CG]TCCACTGCTGGTAGGCCCTGCCGAGGCCGGGGGCTGCAGCTCTGGGTGTCCCTGTGGACG	37	7	866102	CGCCTGCTCCACCCGGCTGGGCAGCGATGTTTCGCCAGATCCTTCCCTCA	7	832628	R					UNC84A;UNC84A	NM_001130965;NM_025154	5'UTR;5'UTR	chr7:862515-862800	S_Shelf				7:832508-832933
cg15340709	34611418	CCTAATAATAAAAATACCCATAATAATAAAAATACTCATAATAATAAACA	24680393	CCTAATAATAAAAATACCCGTAATAATAAAAATACTCGTAATAATAAACG	I	T	Red	GGTGGAGGTGCCCCTGGTGGTGGAGGTGCCCGTGGTGGTGGAGGTGCTCGTGGTGGTGGA[CG]TGCTCGTGGTGGTGGTGCTCGTGGTGGTGGAGGTGCCCGTGGTGGTGGAGGTGCCCGTGG	37	7	157863100	CGTCCACCACCACGAGCACCTCCACCACCACGGGCACCTCCACCACCAGG	7	157555861	R					PTPRN2;PTPRN2;PTPRN2	NM_002847;NM_130842;NM_130843	Body;Body;Body
cg26651148	22649510	AAAATAAACTCCCATAACCACCTATAACAATCAACCCCTCACAATAAACA	59715410	AAAATAAACTCCCGTAACCACCTATAACAATCAACCCCTCGCAATAAACG	I	T	Red	CCCAGCCAACTAGGGGTGAGCTCCCGTGGCCACCTGTGACAGTCAGCCCCTCGCAGTAGA[CG]TGCCGACGTGGCTCCCGAGGTGGAGGGGAAGCTGGAGGCCCTGGGGGCTCTTCTCCCTGA	37	7	157867300	GGGGTGAGCTCCCGTGGCCACCTGTGACAGTCAGCCCCTCGCAGTAGACG	7	157560061	R					PTPRN2;PTPRN2;PTPRN2	NM_002847;NM_130842;NM_130843	Body;Body;Body						7:157560025-157560079
cg01614020	60771383	CACAAACTACATCAAAAACCTCCCAACATATAAATAAAAATAACAAAACA	47764379	CGCAAACTACGTCAAAAACCTCCCGACGTATAAATAAAAATAACAAAACG	I	A	Red	AGAGAGAGGACAGGGGAGAGAGGGAAGGGGGAGGATGGATGGCTGTGTGCGGCTCGGCGC[CG]TTCTGCCACCCCTATTTATACGCCGGGAGGCTCCTGACGCAGCCTGCGATCGATCACGGC	37	8	24814137	CGCAGGCTGCGTCAGGAGCCTCCCGGCGTATAAATAGGGGTGGCAGAACG	8	24870054	F					NEFL	NM_006158	TSS200	chr8:24812946-24814299	Island		DMR	TRUE	8:24868680-24870438	8:24814079-24814435	Unclassified_Cell_type_specific
cg03899054	61792365	TTTCTACAAACATAATAAAAAAAAATCCACACCCCAATACACAAACAACA	28698459	TTTCTACAAACGTAATAAAAAAAAATCCACGCCCCAATACACAAACAACG	I	T	Red	CTCCCCTGCGGAGCAGCTCAGCCTCTTCCTGCCCTTCCTTCCATGGGGCCCTTTGCGTGA[CG]CTGCCTGTGCACTGGGGCGTGGATCCTTCTTCACTACGCTTGCAGAAAATATCTTCTCCA	37	8	143206674	CGCTGCCTGTGCACTGGGGCGTGGATCCTTCTTCACTACGCTTGCAGAAA	8	143204581	F								chr8:143202654-143202868	S_Shelf				8:143204321-143204601
cg21193975	74629308	ACACTCAAAATCTAAACACCTCACATTTACAATCTATTATAACAAACACA	32803366	ACGCTCAAAATCTAAACGCCTCGCATTTACAATCTATTATAACAAACACG	I	A	Red	TTTTTGTCTTCGACGCTCAGGGTCTGGGCGCCTCGCATTTGCAGTCTGTTGTGACAGACA[CG]GGGAGCTCCGCGTGCCAGCCTGTGGCTGCCCTGCTGTGGGGGTCCTGGGGCCGGCGAGGC	37	9	137024866	ACGCTCAGGGTCTGGGCGCCTCGCATTTGCAGTCTGTTGTGACAGACACG	9	136014687	R					WDR5;WDR5	NM_052821;NM_017588	3'UTR;3'UTR	chr9:137028717-137030556	N_Shelf					9:137024848-137026204	Gene_Associated
cg12338214	15657400	ACAAACAACACTCAAATCCCAACCCAAAAAACTCAATAACTTTTATCCCA	72689416	ACGAACAACGCTCAAATCCCGACCCAAAAAACTCAATAACTTTTATCCCG	I	T	Red	CGAGGTGGAGACACGGGCAGCGCTCAGGTCCCGGCCCAGGAAACTCAGTGGCTTTTATCC[CG]TTTCCTTCAACCCCAGATGTGAGCCCTCTGGCCAACCTACCTAACCCACCTGCCCCCAGT	37	10	133783113	CGGGATAAAAGCCACTGAGTTTCCTGGGCCGGGACCTGAGCGCTGCCCGT	10	133633103	R					BNIP3	NM_004052	Body						10:133633029-133633324
cg24749860	12757359	ATATAATAAACCTAAAAAACCAAACCAAACTAATCAAAAAAAACTTTACA	59770305	ATATAATAAACCTAAAAAACCGAACCGAACTAATCAAAAAAAACTTTACG	I	A	Red	ACCAGAGGAGTCATGTGGTGGGCCTGGAAGGCCGGGCCGGACTGGTCAGGGAAGGCTTTG[CG]GACACCTCGGGGAGCCGACACCTAGAGGAGGTGGTGGAGGTGTGGGGGCCAGAGGAAGTC	37	10	80231268	ATGTGGTGGGCCTGGAAGGCCGGGCCGGACTGGTCAGGGAAGGCTTTGCG	10	79901274	R												TRUE
cg04085571	26629479	CCCTTAAAATCCTTCCCTTAACCTACAAAAAAACAACCCCAACATCATCA	13725407	CCCTTAAAATCCTTCCCTTAACCTACAAAAAAACAACCCCAACATCGTCG	I	C	Grn	GGGTGGACCCCAGCCTCCACCTGCCTGTCCTCTTCCTGGCAAGGTTCCTGAAGCTCCCAG[CG]ACGATGCTGGGGCTGCCCTTCTGCAGGCCAAGGGAAGGACCTCAAGGGCAGGAGGACACA	37	11	1872753	CCCTTGAGGTCCTTCCCTTGGCCTGCAGAAGGGCAGCCCCAGCATCGTCG	11	1829329	F	rs689363				LSP1	NM_002339	TSS1500							11:1872527-1872794	Promoter_Associated_Cell_type_specific
cg09575189	70765351	CCTTCCTTCCCACCCACATACCAAAAAATAACCAAACAAACAAATAAACA	54697427	CCTTCCTTCCCACCCACATACCGAAAAATAACCAAACAAACAAATAAACG	I	A	Red	GCGCCCGCCCCACCTTCCTTCCCACCCACATGCCGAAGGGTGGCCAGGCAGGCAGGTGGA[CG]AGTCCAGGCAGCGGCTGAGTCAGTGTGTGTGGAATGTTCTGGCCGCTCCCAGCTGCACCC	37	11	1855561	CGTCCACCTGCCTGCCTGGCCACCCTTCGGCATGTGGGTGGGAAGGAAGG	11	1812137	R					SYT8	NM_138567	TSS200									TRUE
cg14433983	35694430	TTTACAAACACTTTCTCTTCTACACATTTAAAACCTACCCCAACCTATCA	57710425	TTTACAAACACTTTCTCTTCTACACGTTTAAAACCTACCCCGACCTATCG	I	T	Red	TCTCTGCTGCGCTTTGCAAGCACTTTCTCTTCTGCACGTTTGGAACCTACCCCGGCCTGT[CG]TGTCTTTCTCCTGGCCTCCTCGCGAGCCGAACCTACTGTCCGGTCCCGGGACCCCCTGCC	37	11	636460	CGACAGGCCGGGGTAGGTTCCAAACGTGCAGAAGAGAAAGTGCTTGCAAA	11	626460	R					DRD4	NM_000797	TSS1500	chr11:636435-636668	Island				11:626436-627821
cg25201101	56755448	AACTCTTCAATCACTACAACTCTCTCCCCATAATAAACTCTTCTAAAACA	48665480	AACTCTTCGATCACTACGACTCTCTCCCCATAATAAACTCTTCTAAAACG	I	C	Grn	GACTGCAGGGAGGACTCTTCGGTCACTGCGGCTCTCTCCCCATGGTGGACTCTTCTGAGG[CG]CTTGACTGCGCTGATTTGGGCCTTTATCTGTCTGCATGTCGGCAGGGGCGCCCAGGAAGT	37	12	131355465	CGCCTCAGAAGAGTCCACCATGGGGAGAGAGCCGCAGTGACCGAAGAGTC	12	129921418	R					RAN	NM_006325	TSS1500	chr12:131356094-131357228	N_Shore				12:129921210-129921481	12:131354822-131356093	Promoter_Associated	TRUE
cg17878139	24786383	CCATATAAAAAACACACACCCTAAATACTAACCAACAACTCCAAAACACA	50766425	CCATATAAAAAACACGCACCCTAAATACTAACCAACGACTCCAAAACACG	I	C	Grn	TTGGGGTGCCGCCCATGTGGGAGACACGCACCCTGGGTGCTAGCCAGCGACTCCAGGACA[CG]CCGGGCCGGGCGCAGGAGCTGCCGGAAAAGCAATGGCGTCCGCGGGATGACCCCTTCCTC	37	13	19517986	CCATGTGGGAGACACGCACCCTGGGTGCTAGCCAGCGACTCCAGGACACG	13	18415986	R		rs74034643											13:18415369-18417200
cg19001789	25764462	ACACACTCACAAATACCAAAACCACTACACACATAACAATACCAAAAACA	15655394	ACACACTCACGAATACCGAAACCACTACACGCATAACAATACCAAAAACG	I	T	Red	ACTGCCTGGCCGACACACTCACGGGTGCCGGGGCCACTGCACGCATGACAGTGCCAGGAG[CG]TGCACTTACTCCCCGAGCCCTTCCCTCCACGGCCAGGCCCGCAGTGTGAGTGCCAGGGCC	37	13	111464554	CGCTCCTGGCACTGTCATGCGTGCAGTGGCCCCGGCACCCGTGAGTGTGT	13	110262555	R								chr13:111464738-111465988	N_Shore				13:110262437-110264460
cg24852565	26679332	CAAAACCCCTTCCCCAAAATAATATTATACATAAAACTCAACAACAACCA	43803473	CAAAACCCCTTCCCCGAAATAATATTATACGTAAAACTCAACGACAACCG	I	C	Grn	ACTGGGATGCGGCAGGGCCCCTTCCCCGGGATGGTGTTATGCGTAAAGCTCAGCGGCAGC[CG]CTCCTCCCCATCCCAGCTCCAAATCCCAATGACCAACTGCCTGCTGGTTTCCCCACAGGG	37	13	44990174	CGGCTGCCGCTGAGCTTTACGCATAACACCATCCCGGGGAAGGGGCCCTG	13	43888174	R													13:43887869-43888175
cg00716025	55706489	ATACAATCAAACAAATAATAAAAAACATAAACTCCAACCCCACCACAACA	47616391	ATACAATCGAACAAATAATAAAAAACGTAAACTCCAACCCCACCGCAACG	I	T	Red	CCTAGGGAGAGCATGCAGTCGGGCAGGTAGTAGGGAGCGTGGGCTCCAACCCCACCGCAG[CG]TCTAGGGTTGAGTGTTTACAGTTTTCGAAGCCCCGGTGAGCGTGTGTTGCAGCGTGCTTT	37	14	52282833	CGCTGCGGTGGGGTTGGAGCCCACGCTCCCTACTACCTGCCCGACTGCAT	14	51352583	R													14:51352578-51352667
cg18729681	51685481	ACAACTAAATAAACACCATAATTTAAAAACCACTAATCTAACCAAACACA	45773409	ACGACTAAATAAACACCATAATTTAAAAACCACTAATCTAACCGAACGCG	I	A	Red	TGACCTCGTGATCCGCCCGTCTCGGCCTCCCGAAGTGCTGGGATTACAGGCGTGAGCCAC[CG]CGCCCGGCCAGACCAGTGGTTCTTAAACCATGGTGCCTACCCAGCCGCAAGACCATTATC	37	14	91742453	CGCGCCCGGCCAGACCAGTGGTTCTTAAACCATGGTGCCTACCCAGCCGC	14	90812206	F					CCDC88C	NM_001080414	Body	chr14:91738909-91739158	S_Shelf
cg19456540	22791456	ATATAATAAAACTCACAATAATTACCACCATAAAAAACCACAATAACTCA	61676412	ATATAATAAAACTCGCGATAATTACCACCGTAAAAAACCACGATAACTCG	I	T	Red	CTGCCCGTGGCCCCTGCGGCCTGCGAGGCCCTCAACAAGAATGAGTCGGTGCTACGCGCA[CG]AGCCATCGTGGCCTTTCACGGTGGCAACTACCGCGAGCTCTATCATATCCTGGAAAACCA	37	14	60976285	ATATGATAGAGCTCGCGGTAGTTGCCACCGTGAAAGGCCACGATGGCTCG	14	60046038	F				TRUE	SIX6	NM_007374	1stExon	chr14:60975732-60978180	Island			TRUE	14:60045200-60046703
cg02395127	40600345	ATCAAAAACAAAAACAAAACTCAAATTATCATAAAATCCCACTACCCACA	28614487	ATCAAAAACAAAAACAAAACTCAAATTATCGTAAAATCCCGCTACCCACG	I	T	Red	AAGATGGCCTGAGTCAGGAGCAGGGGCAGAGCTCAGGTTGTCGTGGGGTCCCGCTGCCCA[CG]TCAGACTGGAGGTGAGGGATGGGCGGGGCCTGACAGCAGGCCTGGAAGGAACAGGATGTC	37	15	75104987	CGTGGGCAGCGGGACCCCACGACAACCTGAGCTCTGCCCCTGCTCCTGAC	15	72892040	R					LMAN1L	NM_021819	TSS1500
cg22038124	37686329	ATAATTACACTAACCTCACCCTCCACTCTACACTAACAAAAAAAAACACA	15696313	ATAATTACACTAACCTCACCCTCCACTCTACACTAACGAAAAAAAACACG	I	T	Red	AGGAATGAGAGTTACTGGCAGGAAAGAGGAGAGCCTCTGAAACCAGGAATCACTTCCCAA[CG]TGCTCTCCTCCGCTAGTGCAGAGTGGAGGGTGAGGTCAGTGCAACCATTCTCACCTCAAT	37	15	51396175	CGTGCTCTCCTCCGCTAGTGCAGAGTGGAGGGTGAGGTCAGTGCAACCAT	15	49183467	F					TNFAIP8L3	NM_207381	Body					TRUE
cg02402744	10711447	TTAACTCACAAATACACCCAACCAAACTCCACATCCATCATTACAAAACA	33759440	TTAACTCACAAATACACCCAACCAAACTCCGCATCCATCGTTACAAAACG	I	T	Red	CCTTAGGGGAACTTGGCTCACAGGTGCACCCAGCCAGGCTCCGCATCCATCGTTACAGGG[CG]TTGTTCCTTCCATGTCTTCATGTGGCTCCTCCTTTTCTTATGGGGACACCCACCGTTGCA	37	16	88261612	CGCCCTGTAACGATGGATGCGGAGCCTGGCTGGGTGCACCTGTGAGCCAA	16	86819113	R								chr16:88263126-88263330	N_Shore				16:86818806-86819459
cg06489159	50629346	AACAAATCTCAAAATCTAAACTCAATAAAACAAAAACTTAACCACCTCCA	27665488	AACAAATCTCGAAATCTAAACTCGATAAAACGAAAACTTAACCGCCTCCG	I	A	Red	CACTCGGAGTTCCTGAAGAAATCTACTTTTGCCCGCCTCCCACCCTACAGGTATCGATTC[CG]GAGGCGGTCAAGTTCTCGCTCCACCGAGCCCAGATCCCGAGACCTGTCCCCCATCAGCAA	37	16	24372930	CGGAGGCGGTCAAGTTCTCGCTCCACCGAGCCCAGATCCCGAGACCTGTC	16	24280431	F					CACNG3	NM_006539	Body						16:24280375-24280543
cg08884074	67792412	CACTACTCCTCCAACTAAAAAAAATATCACCCTACCAAACTAAAAAACCA	35730359	CGCTACTCCTCCAACTAAAAAAAATATCGCCCTACCAAACTAAAAAACCG	I	T	Red	CAAACAGCCCTCCGCTGCTCCTCCAGCTGAAGGGAGTGTCGCCCTGCCAAGCTGGGAGAC[CG]TCCTTCTCCCTGGTCTTTGCATTTTCTTTGGGGAGCTGTGAATTTCCAGTGGGCATGGGA	37	16	85414436	CGGTCTCCCAGCTTGGCAGGGCGACACTCCCTTCAGCTGGAGGAGCAGCG	16	83971937	R													16:83971889-83972001
cg09521490	36617394	CCCTAACCTAAACATCTTAATAATCTCCTCTATCTACCTCAACATCTACA	12771448	CCCTAACCTAAACATCTTAATAATCTCCTCTATCTACCTCGACATCTACG	I	A	Red	CAGCTGCCCTCACCAGCTCCCGTGGATGTGGGCTCTGCCGGGTGTTCCTTGCAAGGCGCC[CG]CAGATGCCGAGGCAGACAGAGGAGACCACCAAGATGCCCAGGTCAGGGGCCACCAGCCGG	37	16	88807933	CCCTGACCTGGGCATCTTGGTGGTCTCCTCTGTCTGCCTCGGCATCTGCG	16	87335434	F					FAM38A	NM_001142864	Body	chr16:88803802-88804112	S_Shelf				16:87335345-87335435
cg09464728	48667432	CAACACAATATTCACCAAAATCTAAAAACCAAATACAAAAAAACACCTCA	51676491	CGACGCGATATTCACCAAAATCTAAAAACCAAATACAAAAAAACACCTCG	I	A	Red	CTGGGTGTCTGGGGTGGCTGGCCGAGCAAGGAGTTCTGAGGCCGGGGAGAGGAGGGGGAC[CG]AGGTGCTCTCCTGCATCTGGTTCCTAGATCCTGGTGAACACCGCGCCGGAGCCAGGGAAG	37	17	74533239	CGGCGCGGTGTTCACCAGGATCTAGGAACCAGATGCAGGAGAGCACCTCG	17	72044834	F					CYGB	NM_134268	Body	chr17:74533281-74534566	N_Shore							TRUE
cg11613425	61688352	AAAAAAACAACCCCAAAATTCTACCACATAACATACAATAAACCCAACCA	72737452	AAAAAAACAACCCCGAAATTCTACCACGTAACGTACGATAAACCCAACCG	I	C	Grn	ACGCGGGTGAGGGGCTGAGGGGCTGAAAGGCTGAAGGGCGGGCAGCGTGCCGGGTCCCTG[CG]GCTGGGTCCACCGCACGTCACGTGGCAGAATCCCGGGGCTGCTTTCTCTCCGGCTGCTCA	37	17	16570837	CGGCTGGGTCCACCGCACGTCACGTGGCAGAATCCCGGGGCTGCTTTCTC	17	16511562	F	rs73277106							chr17:16569938-16570517	S_Shore		DMR		17:16510388-16511665			TRUE
cg12088417	27714502	AAAAACATTTCACAATTACACTACAAAAAAAACACATACAACAAAAAACA	47602398	AAAAACGTTTCACAATTACACTACAAAAAAAACACGTACGACGAAAAACG	I	C	Grn	CGCCGCACGTGCCCTCTCTGCAGTGTAACTGTGAAACGCCTCCCAAGATGACCGCAGCAG[CG]TCTCCCGCCGCACGTGCCCTCTCTGCAGTGTAACTGTGAAACGCCTCCCATTGAGAGGCG	37	17	78574716	GGAGGCGTTTCACAGTTACACTGCAGAGAGGGCACGTGCGGCGGGAGACG	17	76189311	F	rs62068300	rs7209768			RPTOR;RPTOR	NM_001163034;NM_020761	Body;Body						17:76189251-76189372
cg13727849	58605493	TAAATAACCTAAAAAAATTTAACAAAAACTAAATAAAATCTCCCAAATCA	53712472	TAAATAACCTAAAAAAATTTAACAAAAACTAAATAAAATCTCCCGAATCG	I	A	Red	TCTTTCCGGGGCTGAGTGGCCTAGGAAAGTTTGGCAGAAACTGAGTAGAGTCTCCCGAGT[CG]GTCTTCGCAGCACCCCTCCTCCCCAGCCCCGGCCTGCAGGGTGGGAGTCTCAGCTGGAAG	37	17	72210343	TGAGTGGCCTAGGAAAGTTTGGCAGAAACTGAGTAGAGTCTCCCGAGTCG	17	69721938	R					MGC16275;TTYH2	NR_026914;NM_032646	TSS1500;Body	chr17:72208474-72208902	S_Shore		CDMR
cg22842932	65739448	CTAAACACAAAAAAAAATATCAAAATAACCAATCCTTAAAACCCCTACCA	41628406	CTAAACGCGAAAAAAAATATCAAAATAACCAATCCTTAAAACCCCTACCG	I	A	Red	ATGGTGGCCAACCTGAACGCGGAGAAGGATGTCAGGATAGCCAGTCCTTGAGACCCCTAC[CG]ACCCCATCCCACTCTCTATCCTATTCCTTTCCTCCTCCCCGCATGTTTCCCCTCCACCCA	37	17	61959568	CGGTAGGGGTCTCAAGGACTGGCTATCCTGACATCCTTCTCCGCGTTCAG	17	59313300	R					GH2;GH2;GH2;GH2	NM_022556;NM_022558;NM_002059;NM_022557	TSS1500;TSS1500;TSS1500;TSS1500					TRUE		17:61958463-61960372	Unclassified	TRUE
cg22996004	12683377	AAATATAAAAAAATCTCTTACAACTCAAACAAAACAAAAAATATATCCCA	34600336	AAATATAAAAAAATCTCTTACAACTCAAACGAAACGAAAAATATATCCCG	I	A	Red	TCACCTACAGGCACCTACTATGGGCCAGCCACTTAATACTGACTACTCCCCTCAAGCCCC[CG]GGACACATCCTCCGCCCCGCCTGAGCTGCAAGAGATCCTCCTATACCTTTAACCAACCTC	37	17	46018654	AGGTATAGGAGGATCTCTTGCAGCTCAGGCGGGGCGGAGGATGTGTCCCG	17	43373653	F					PNPO	NM_018129	TSS1500							17:46018384-46020000	Promoter_Associated
cg23148631	15748364	AAACAATAACACTAATACCTAAAAAAACACCCATCACTTAACAAATCACA	33794323	AAACGATAACGCTAATACCTAAAAAAACACCCATCACTTAACAAATCGCG	I	A	Red	CACAAGAAGCTGCTGGAGCAGAGTGTTCCCTGACTCCTCCAAGGAAAGGACACTCCTTTT[CG]CGATCTGCTAAGTGATGGGTGTCTTCCCAGGCACTAGCGTTACCGCTTGACCAAGGAGCC	37	17	6950669	CGCGATCTGCTAAGTGATGGGTGTCTTCCCAGGCACTAGCGTTACCGCTT	17	6891393	F								chr17:6945389-6947521	S_Shelf				17:6891250-6891477
cg25767345	34730352	ATATAACCAAAAAACATAAAATTCCTAAACCTCCTTCCACACCCTAACCA	34660439	ATATAACCAAAAAACGTAAAATTCCTAAACCTCCTTCCACGCCCTAACCG	I	C	Grn	GGAGTGGTCTTTGTGTAGCCAGAAAACGTGAAGTTCCTGGACCTCCTTCCACGCCCTAAC[CG]CCGCCCGCAAACTCAGGGGAGGTAGGGCAGAAGCAGCCCCCAGCCCCCCACTTCCAGCGC	37	18	54788969	GTGTAGCCAGAAAACGTGAAGTTCCTGGACCTCCTTCCACGCCCTAACCG	18	52939967	R								chr18:54788959-54789194	Island				18:52939958-52940192
cg04178634	29644402	AAAAAACCATAAAAACTATATACACCTTTAACCACCTAACCCTACCCCCA	51644504	AAAAAACCGTAAAAACTATATACACCTTTAACCACCTAACCCTACCCCCG	I	A	Red	GAGCTTGCCTCGGGGCCCGTGGCCCGGGGAAGCTGTGGGAGGGGCGGGAGCAGGCAGCTC[CG]GGGGCAGGGCCAGGTGGTCAAAGGTGCACACAGTCCCCACGGCTCCCTCCTGACGGTCGG	37	19	2525231	CGGGGGCAGGGCCAGGTGGTCAAAGGTGCACACAGTCCCCACGGCTCCCT	19	2476231	F	rs73516633				GNG7	NM_052847	5'UTR	chr19:2525140-2525460	Island				19:2475387-2476578			TRUE
cg05649427	17645494	AATCCAAAAACCTCCTTTATTTATAAATTACCCAACCTTAACAAAACACA	21617326	AATCCAAAAACCTCCTTTATTTATAAATTACCCAACCTTAACGAAACGCG	I	A	Red	GGCCTCATTGATCCTCCCACCTCGGCCTCTGAAAGTGCTGGGATTCTAGGCGGGAGCCAC[CG]CGCCCCGCCAAGGCTGGGTAATTTATAAACAAAGGAGGTTCCTGGACTCACAGTTCTGCA	37	19	1547396	CGCGCCCCGCCAAGGCTGGGTAATTTATAAACAAAGGAGGTTCCTGGACT	19	1498396	F								chr19:1546219-1546455	S_Shore
cg12062672	37802324	TCAAAAAACCAAAACAAACAAAAAATAAACAAACAAATAATACCACCACA	73624311	TCAAAAAACCAAAACGAACAAAAAATAAACGAACAAATAATACCGCCGCG	I	T	Red	GCGGCCAGCCCATGTTCCTGGCGCTGGACAGGAGGGGGGGGCCCCGGCCAGGCGGCCGGA[CG]CGGCGGTACCACCTGTCCGCCCACTTCCTGCCCGTCCTGGTCTCCTGAGGCCCTGAGAGG	37	19	643555	CGCGGCGGTACCACCTGTCCGCCCACTTCCTGCCCGTCCTGGTCTCCTGA	19	594555	F	rs11572889				FGF22	NM_020637	Body	chr19:643092-643720	Island				19:594093-595743
cg13083129	21721446	CTAAAAAAATATAAAACCACACTAAAAAAACTATACTTCCAAAAAAAACA	32796304	CTAAAAAAATATAAAACCACGCTAAAAAAACTATACTTCCGAAAAAAACG	I	A	Red	GAGGGCTTGAACCTAAGTGGCCCCTGCAGCATCCATGGCGGGACCGTGGACCTCCAAGCC[CG]CCTCCCTCGGAAGCACAGCTTCCTCAGCGTGGCCCCACACTCTCCCAGGCTCACCCAGCC	37	19	1311811	CTGGGAGAGTGTGGGGCCACGCTGAGGAAGCTGTGCTTCCGAGGGAGGCG	19	1262811	F								chr19:1312787-1313528	N_Shore					19:1311759-1312040	Unclassified_Cell_type_specific	TRUE
cg14080585	33775314	CAACCAACACAACAACCAACATAATCATCAAACCAACTATACAAAAAACA	55803416	CGACCAACACGACGACCAACATAATCATCGAACCAACTATACAAAAAACG	I	C	Grn	TTTGGGCAGCCCGGTGGGGGTCCCGGGGGCGGGCGGCGGGACGGCGGCCGGGCTGGGCAG[CG]CCCCTTGCATAGTTGGCCCGATGACCATGCTGGCCGCCGTGCTGGCCGGGCCGCTGGCCG	37	20	60639721	CGCCCCTTGCATAGTTGGCCCGATGACCATGCTGGCCGCCGTGCTGGCCG	20	60073116	F					TAF4	NM_003185	1stExon	chr20:60639272-60639835	Island		DMR		20:60072529-60075200	20:60637939-60640028	Promoter_Associated
cg25788719	61600376	CCCTCACTAAAAAAACCAAAACTAAACCCCAAAATAAACCTATAAAAACA	43651323	CCCTCGCTAAAAAAACCGAAACTAAACCCCAAAATAAACCTATAAAAACG	I	A	Red	TCCGCTGTTGGGCCCTCGCTGAAGGGGCCGAGGCTGAGCCCCAAGGTGGGCCTGTGGGGG[CG]GGGCGGGGGAGCCCCTCAGCAGCTGGACCGCAGGAGGCCGACCAGGGTCTGGAACTCCTC	37	20	3713002	CCCTCGCTGAAGGGGCCGAGGCTGAGCCCCAAGGTGGGCCTGTGGGGGCG	20	3661002	R		rs62206552			HSPA12B	NM_052970	TSS1500	chr20:3713159-3713515	N_Shore					20:3712909-3713381	Unclassified_Cell_type_specific
cg10415509	21741427	CAAAACTAACATAAACCTAATACAAATTCCCCCCACATCAAATCTCTACA	39623500	CGAAACTAACGTAAACCTAATACAAATTCCCCCCACATCGAATCTCTACG	I	T	Red	GGTAAGTGTGGGCGGGGCTGACGTGAGCCTGGTACAGGTTCCCCCCACATCGAATCTCTA[CG]TTCAGGGGCCCGTGGCCCTCGGGAGGTGGGAGAGCTGGGAGTGAGGCCTCCTGTGTGGGG	37	21	46876904	CGGGGCTGACGTGAGCCTGGTACAGGTTCCCCCCACATCGAATCTCTACG	21	45701332	R					COL18A1;COL18A1;COL18A1	NM_130444;NM_030582;NM_130445	Body;Body;Body	chr21:46876168-46876752	S_Shore				21:45700597-45701654	21:46876766-46876906	Unclassified_Cell_type_specific
cg12121965	21695466	CACAACTATTCCAAACAAAAACCACTTATACTAAAATCAAAATTATAACA	71657338	CGCGACTATTCCGAACGAAAACCGCTTATACTAAAATCGAAATTATAACG	I	C	Grn	GTCGGCCCGCGGGCCACTCCGGGCGCCATGGTCGGCCGGTCGCTCTATCAGTCAGTGGAG[CG]TTACAACTCCGACTCCAGCACAAGCGGTCTCCGCCCGGAACAGCCGCGGCGCCGGAAGTG	37	21	46293563	CGCGGCTGTTCCGGGCGGAGACCGCTTGTGCTGGAGTCGGAGTTGTAACG	21	45117991	F					PTTG1IP;PTTG1IP	NM_004339;NM_004339	5'UTR;1stExon	chr21:46292709-46294744	Island	high-CpG:45117757-45118159			21:45117172-45118785	21:46293496-46294061	Promoter_Associated
cg20398123	44704411	TAAACTCATAAAACCATAACCTCTATACCTAACTTTTTCTCACAACACCA	61657501	TAAACTCGTAAAACCGTAACCTCTATACCTAACTTTTTCTCGCAACACCG	I	T	Red	CTCAGCCATGAGAAGGGGGATGCTCTGAGCCGCGCGGCCACACCACCAACCCGGAGGACA[CG]GTGCTGCGAGAAAAAGCCAGGTACAGAGGCCACGGCTCTACGAGTCCATTTCTGTGCAGT	37	21	45926961	CGGTGCTGCGAGAAAAAGCCAGGTACAGAGGCCACGGCTCTACGAGTCCA	21	44751389	F					C21orf29	NM_144991	Body	chr21:45926531-45926754	S_Shore				21:44750984-44751432	21:45926596-45926966	Unclassified_Cell_type_specific
cg23272544	43644478	CTACTCAAATAAAACAAAACCAAAACAAATACCCTCAACAAAAAAACTCA	44774436	CTACTCGAATAAAACAAAACCGAAACAAATACCCTCGACGAAAAAACTCG	I	A	Red	TTGCCGGCCACTGGGAGGGGCCGGTGCACCCTGGGCAGCCCCTGCCAGGGCCCTGAGACC[CG]AGCCTCCCCGCCGAGGGCACCTGTCTCGGCTTTGCCCCATTCGAGCAGGGCCCTCGCCGA	37	21	45705429	CTGCTCGAATGGGGCAAAGCCGAGACAGGTGCCCTCGGCGGGGAGGCTCG	21	44529857	F	rs76089797				AIRE	NM_000383	TSS1500	chr21:45705428-45706044	Island							TRUE
cg00123001	31611471	ACTTACTAAAAACTTTTAACCACTCATTTAATTATAATCCAACACATAAC			II			CCCCACACAGAGCAGAGCGTCCAACAGCTGGGACTGATTAATCCAGACGGCCGACTATTA[CG]TCATGTGTTGGATTACAACCAAATGAGTGGCTAAAAGCTCCTAGCAAGTTCAGGCCAACA	37	X	13395880	CGTCATGTGTTGGATTACAACCAAATGAGTGGCTAAAAGCTCCTAGCAAG	X	13305801	F								chrX:13396888-13397494	N_Shore
cg05088006	58780334	AACTCAATCATTTACTATAACAAACAACTACAATAATAATAACCRCCCCC			II			CAGATTCTCGCAGGCCACTCGGATGGAGACGACTCCTTAAGACTGCTCAGTTTCCGGGGG[CG]GGGGCGGCCATCATCACTGCAGCTGCCTGTTACAGCAAATGACTGAGCTCTCCCGGGGAG	37	X	32886461	CGGGGGCGGCCATCATCACTGCAGCTGCCTGTTACAGCAAATGACTGAGC	X	32796382	F					DMD;DMD;DMD;DMD;DMD	NM_004010;NM_004009;NM_000109;NM_004006;NM_004007	5'UTR;Body;Body;Body;5'UTR
cg15514224	10733490	ATAAACCAAAACTCTAATCCTAAAAAACAAAAACTATTAATAAAACCAAC			II			CGATTGCAGTGATGGGCCAGAGCTCTAGTCCTAGAGGACAGGAACTGTTAATAAAACCAG[CG]GGGAGCTGATGGACTGGGAGACAGATGAGAGAAGGGCTCCAAGGCCAGGGCCTCTGAGGA	37	X	16732246	TGGGCCAGAGCTCTAGTCCTAGAGGACAGGAACTGTTAATAAAACCAGCG	X	16642167	R					CTPS2;CTPS2	NM_019857;NM_175859	TSS1500;TSS1500	chrX:16729925-16730938	S_Shore					X:16731856-16732379	Unclassified_Cell_type_specific
cg00532502	22708373	TAATATCCCCTACAACCATTACTACACTCACCCAAACCAACCTAAAAAAC			II			GCGTGACTCCCTTGGCCCTGGGGTTCTGTGGGGACCACCCAGAGCCAGGCCCTCCCTCCA[CG]CTTTCCAGGCTGGTCTGGGTGAGTGCAGCAATGGCTGCAGGGGACACCAGGACCTAACTC	37	1	246953273	CGCTTTCCAGGCTGGTCTGGGTGAGTGCAGCAATGGCTGCAGGGGACACC	1	245019896	F	rs10802444				LOC149134	NR_015422	Body	chr1:246952214-246952511	S_Shore
cg00647881	12743326	TAAAAAAACAAAAACTACATCTCCCCCTCAAACTATAATTCCCTAAAACC			II			CCCTCTCTGAATGGGAAGGCAGGGGCTGCATCTCCCCCTCAGACTGTGGTTCCCTGAGGC[CG]GAGGCGATACCTCCATCTCACCCTGAGGGCAGACGCTAAAGCTTCCCTTGTGTCTGGGAG	37	1	153536528	CGGCCTCAGGGAACCACAGTCTGAGGGGGAGATGCAGCCCCTGCCTTCCC	1	151803152	R		rs34913379			S100A2	NM_005978	5'UTR
cg00763594	67650420	TAAAATTAACCTCCCTCATCTATAACACAACAAACTAACAAAAATAAAAC			II			ACCCCTGGCTCTGGGGTTAGCCTCCCTCATCTGTAACACAGCAAGCTGACAAAAATGGAA[CG]TCAGCACATTTGCATGTAGACAGATTTTAGTCCCAGCAGATAAGCACACCCAACATGTCA	37	1	15256054	GGGGTTAGCCTCCCTCATCTGTAACACAGCAAGCTGACAAAAATGGAACG	1	15128641	R					KIAA1026;KIAA1026;KIAA1026;KIAA1026	NM_201628;NM_001018001;NM_015209;NM_001018000	Body;TSS1500;Body;Body					TRUE				TRUE
cg00768741	54603466	TAAACAACRTCCACRTCAAAATCTAAAACTAAAAACTAACTCCAAAACCC			II			CAGGACACAGGTGGACAGCGTCCACGTCAGGATCTGAAGCTGGAAGCTGGCTCCAGGGCC[CG]TCCTCGCCGTAACCTGAAGCAGGTAGGTAGCAAGGGGGGATTTGGCTCTTCCTAAACATC	37	1	22210791	CGGGCCCTGGAGCCAGCTTCCAGCTTCAGATCCTGACGTGGACGCTGTCC	1	22083378	R					HSPG2	NM_005529	Body	chr1:22210992-22211318	N_Shore				1:22083378-22083875
cg02067098	61626468	AAACTAAAACCAACCCAACTACCCCTACCCCAAAAATAAACAAAACTAAC			II			AGATCCGTGGAGCCACACGGTGCCGAGCGCGGCGCTGGCCGTGTGCTCCGTGTCTGTCAT[CG]TCAGCCCTGTCCACCTTTGGGGCAGGGGCAGCTGGGCTGGCTCCAGTTTCTCTCCATGTC	37	1	3195570	CGTCAGCCCTGTCCACCTTTGGGGCAGGGGCAGCTGGGCTGGCTCCAGTT	1	3185430	F					PRDM16;PRDM16	NM_022114;NM_199454	Body;Body	chr1:3195376-3196052	Island				1:3185237-3185890
cg02237875	19684474	ACCAAACRTCTCAAAATTCCCAACAACATCAACAACAACAAAATATATCC			II			GGAAAGGGAGCACCAGACGTCTCAGGATTCCCAGCAGCATCAGCAGCAGCAGGGTATGTC[CG]ACCATGACTCCCCAGATGAGAAGGAGCGCTCTCCGGAGATGCATCGCGTCTCCTACGCCA	37	1	205210770	CGGACATACCCTGCTGCTGCTGATGCTGCTGGGAATCCTGAGACGTCTGG	1	203477393	R					TMCC2	NM_014858	Body	chr1:205210695-205210918	Island				1:203477350-203477644
cg03125480	41615306	ATATACCTTAAAATAAATAAATATACCCAAATATATCATAACCTATTCCC			II			GGCCAGCAGCCCCAGCTTCCCCAGGTATCCCCAGGGGGCAGCCGGGGCCACCTCGGTGTG[CG]GGAACAGGCCATGACACACTTGGGCACACCCACCCACTCCAAGGCACACATACGCACACG	37	1	3135001	CGGGAACAGGCCATGACACACTTGGGCACACCCACCCACTCCAAGGCACA	1	3124861	F					PRDM16;PRDM16	NM_022114;NM_199454	Body;Body						1:3124790-3124944
cg04208291	10779501	AAAATACCCAATTCTAAAACTTCAAAACATATCCCCAACAAATCTTCCCC			II			CTTGTGCCTTGATGTGATGGTGCCGTCCTGCTCAACAGTTTTGAATCCTCTGGGAAGGCA[CG]GGGAAGATCTGCTGGGGACATGTCTTGAAGCCTCAGAACTGGGTACCCCCTTTCAGACAG	37	1	115829893	CGGGGAAGATCTGCTGGGGACATGTCTTGAAGCCTCAGAACTGGGTACCC	1	115631416	F	rs35329343	rs6331			NGF	NM_002506	5'UTR
cg06281016	59777490	CCATCTTATAACCCTTCAACTTCTTTTAAAATAACACAACCTATCCCCTC			II			CCCCTGGGTCCCCATCTTGTGGCCCTTCAGCTTCTTTTGGGATAGCACAGCCTGTCCCCT[CG]TTGCCTCCCCCAACTCCGTGAAGGCCACAGTCATATTTCACCCCAGCCCTGGCTTGGGGC	37	1	110307811	CGAGGGGACAGGCTGTGCTATCCCAAAAGAAGCTGAAGGGCCACAAGATG	1	110109334	R					EPS8L3;EPS8L3;EPS8L3	NM_024526;NM_139053;NM_133181	TSS1500;TSS1500;TSS1500
cg06724462	50617484	ACCTTACCCAAAACTCTCAAACTTCACAAAACAATATAAAAATCCCACTC			II			ACCCCAAGACAGCCTTACCCAGAACTCTCAGGCTTCACAGGACAGTGTGGAAGTCCCACT[CG]CTGAAACTCAAGGCCCTGGTGACTGCATCTTTCTGTTCACTCCCCAGATACTGTCTGAGC	37	1	41266297	CCTTACCCAGAACTCTCAGGCTTCACAGGACAGTGTGGAAGTCCCACTCG	1	41038884	R					KCNQ4;KCNQ4	NM_004700;NM_172163	Body;Body	chr1:41267919-41268398	N_Shore			TRUE
cg07191791	36608375	AAAACTACACCCCAACCTAATAATATCAACTCAAAAATACTAAAAAAAAC			II			AAGCAAGGCTCAAGGCTGCACCCCAGCCTGGTGGTGTCAACTCAGAGATGCTAAGGAAGA[CG]TGTGTTCTCCTCTGCCTCCCCTAGAAATCACCCTGCAAACCCACTGAAGGCCAATGATGA	37	1	223505166	AGGCTGCACCCCAGCCTGGTGGTGTCAACTCAGAGATGCTAAGGAAGACG	1	221571789	R					SUSD4;SUSD4	NM_017982;NM_001037175	Body;Body					TRUE
cg08587864	21664379	TTAAATACCTACATATAACAAACCATACTTAAAATACTCATAATACAACC			II			ACAGATACTGATTGAATGCCTGCATGTAACAAGCCATGCTTGGGGTGCTCATGATACAGC[CG]TGAATGAAACACACAAAAATTGCTGCTCTCATGAAACTCTCTTTTTTGGTGCATTGACCT	37	1	172413612	CGGCTGTATCATGAGCACCCCAAGCATGGCTTGTTACATGCAGGCATTCA	1	170680235	R	rs80166816			TRUE	C1orf105;PIGC;PIGC	NM_139240;NM_153747;NM_002642	Body;TSS1500;TSS1500	chr1:172412867-172413281	S_Shore					1:172412638-172413875	Promoter_Associated
cg08929791	74735391	ACACAAAAAAATTATTTAATAAATAATAAAACCAAAATTCTAACCTAACC			II			AGGAAACTGAGGCACAGAGAGGTTATTTGGTAAATGGTGGAGCCAGGATTCTAACCTGGC[CG]TTCTAGCTTTGAAATCGATGATTTTAACCACCTTGTACTTCTCTAAAACACACTGACATG	37	1	16535904	CGGCCAGGTTAGAATCCTGGCTCCACCATTTACCAAATAACCTCTCTGTG	1	16408491	R					ARHGEF19	NM_153213	5'UTR	chr1:16532917-16534580	S_Shore			TRUE
cg09507184	72751462	AATATACTCRTCATAAAACACATCTCCRTTATAATTAACAATACTACATC			II			CAGGGGGGAAGAATGTACTCGTCATAAAGCACATCTCCGTTGTAGTTGACAATGCTACAT[CG]AGCCAAGGAACTAACATGCCCCTTTGGTCCTGTGCCCACCATCTCACAGTCAATTGCCAC	37	1	156696846	ATGTACTCGTCATAAAGCACATCTCCGTTGTAGTTGACAATGCTACATCG	1	154963470	R					ISG20L2;C1orf66;C1orf66	NM_030980;NM_015997;NM_001142560	1stExon;TSS1500;TSS1500	chr1:156698111-156698916	N_Shore		RDMR	TRUE
cg09860601	59679423	CTACTATATACTAAAACTAATACCCAACRCCCAACCRAAAACTACAAAAC			II			GCAGACTCGGGCTACTATGTGCTGGAGCTGGTGCCCAGCGCCCAGCCGGGGGCTGCAAGA[CG]CCAGCAGCTGCCAGGGAACGCCACGGACTGGATCTGGGCCGGCCTCGACCCGGACACGGA	37	1	1374601	TACTATGTGCTGGAGCTGGTGCCCAGCGCCCAGCCGGGGGCTGCAAGACG	1	1364464	R					VWA1;VWA1	NM_022834;NM_199121	Body;3'UTR	chr1:1374461-1375584	Island				1:1364325-1365471
cg10639277	38615411	CTACATAAAAATCCCAAAACAATAACAACTAAACAAACCCTTACCAACAC			II			AGTGACTCAGTCTGCATGGAGATCCCAGGACAGTGACAGCTGAACAAACCCTTACCAACA[CG]CTCGTCCCGCGCCGGCCCAAGTCTCCCCCGGCCTCCTGCAGGCGCACAGACCTCATCCGC	37	1	5937158	TGCATGGAGATCCCAGGACAGTGACAGCTGAACAAACCCTTACCAACACG	1	5859745	R					NPHP4	NM_015102	Body	chr1:5937157-5937392	Island				1:5859745-5859915	1:5937082-5937731	Unclassified_Cell_type_specific
cg11407801	71620396	CCRTATATAAACTACTAAATTCACCTACACCTAACCCTCCTTCTAAATTC			II			TGCGCCTCCCCAGCCTCCCTCTCCAAATCACTGTGTGAACATCAGGGAGTCAGGTGCAGG[CG]AACCTAGAAGGAGGGTCAGGTGCAGGTGAACCTAGTAGCCCACACACGGGCAGTAGGGTC	37	1	857657	CGTGTGTGGGCTACTAGGTTCACCTGCACCTGACCCTCCTTCTAGGTTCG	1	847520	F								chr1:858970-861632	N_Shore			TRUE
cg11758127	41609420	TAAATACCAAAAAATCACAAACATCCRTTAATAAACTTCCRTAATAACCC			II			GCTGCGCGACCGCCTGTGGAACAGTGGGGACGCTGCTGGTGTCCTCCAGGCCTGGGTGGG[CG]GGTTACCACGGAAGCCTATCAACGGATGCCTGTGATTCCCTGGTATTTATAGGTATGTCT	37	1	2002884	AAATACCAGGGAATCACAGGCATCCGTTGATAGGCTTCCGTGGTAACCCG	1	1992744	F	rs76394063				PRKCZ	NM_002744	Body	chr1:2005179-2005565	N_Shelf				1:1992376-1992769
cg11951169	54678362	CCTATTTATAAAAAAATCCAAAATACATATCTACATTATTTAACTACTAC			II			ACATACAATCGGGTCTTCTTGCTTGAATAGCATTTGTCAACAAGAACATGGAAGTGAAAA[CG]CAGCAGTCAAATAATGTAGACATGCATTCTGGACCTCTTCATAAATAGGCATAAGGAAAA	37	1	155470302	CGCAGCAGTCAAATAATGTAGACATGCATTCTGGACCTCTTCATAAATAG	1	153736926	F					ASH1L	NM_018489	Body					TRUE		1:155470196-155470348	Unclassified_Cell_type_specific
cg12664795	21725378	ACTACAAATCCTCRATAAATACACAAATAAAATTAAAAACCACTCTTCCC			II			TTGAAAGCCAAGCTACAAGTCCTCGGTAAATGCACAGGTGGGATTGAGAACCACTCTTCC[CG]TTTGTTGCACTTTCCTCTGATTGATCCCCACGCGTCACCTATTTTACATATACCCACCCT	37	1	156270918	CGGGAAGAGTGGTTCTCAATCCCACCTGTGCATTTACCGAGGACTTGTAG	1	154537542	R					VHLL	NM_001004319	TSS1500
cg13573980	53699350	CCCTATTCRACCTTATACATCTAATCTTACAAAAACCAAAAAAATCCTAC			II			CAAGTTCTTGACCCTATTCGGCCTTATACATCTGGTCTTACAAAGACCAAAGGGATCCTG[CG]CTTGATCAACTGAACCAGTATGCCAAAACCAGGCATCCAATTTGTAAACCAATTATGATA	37	1	223963249	CGCAGGATCCCTTTGGTCTTTGTAAGACCAGATGTATAAGGCCGAATAGG	1	222029872	R					CAPN2;CAPN2	NM_001146068;NM_001748	3'UTR;3'UTR
cg13674705	62748383	TAAATAAATCTATTCTTCCAACCTTTTCTTACTTTCCCTTTATAATCTAC			II			ACTTCAGGGAACGAAGGACTGTGGGGAGGCATTGGGAAGTGGTCATGTCCATGCAAGGAC[CG]TAGACCACAAAGGGAAAGTAAGAAAAGGCTGGAAGAATAGACCCACTCATGAACTAGCTG	37	1	184829177	GAGTGGGTCTATTCTTCCAGCCTTTTCTTACTTTCCCTTTGTGGTCTACG	1	183095800	F					FAM129A	NM_052966	Body					TRUE
cg14824543	56689320	CTACCAAAAATTCTAAAACAATAACRAAATATTAATAAACACCCCACACC			II			GTGAAATGGGTCCCAGAGAGTCCACAGGTGGAGAACGGCCTTCACCAGGCAGCCAGGGAA[CG]GTGTGGGGTGCTCACCAACACCCCGTCACTGCTCCAGAACCCCTGGCAGCCACAGAGCTC	37	1	1076166	CGGTGTGGGGTGCTCACCAACACCCCGTCACTGCTCCAGAACCCCTGGCA	1	1066029	F								chr1:1072369-1072847	S_Shelf				1:1066004-1066303	1:1076143-1076249	Unclassified_Cell_type_specific
cg15088574	51638386	AAAAAAAATTCATTTTATACTTTTAACTCCAAAACAAACCCATCACCACC			II			ACACCTGTAAACGCACAGCCCATGCCCCATTGTAAAGGTGACTGAAGAGAATGGTCAACT[CG]GTGGTGATGGGCCTGTTTTGGAGCTAAAAGCATAAAATGAATCCTCCCTGTAGCTCCATT	37	1	4848991	CGGTGGTGATGGGCCTGTTTTGGAGCTAAAAGCATAAAATGAATCCTCCC	1	4748851	F
cg16262392	23653486	CCATTTCAACACCCTACCACTTAAAATAAACCCCTCCTACTCTTCTTAAC			II			GAGACCATTTGGCGCCAGTCCCCTAGGAGATGGGAGGAGGGAGATAGGTATGAGGGTAGG[CG]CTAAGAAGAGTAGGAGGGGTCCACTCCAAGTGGCAGGGTGCTGAAATGGGCTAGGACCAA	37	1	153932122	CATTTCAGCACCCTGCCACTTGGAGTGGACCCCTCCTACTCTTCTTAGCG	1	152198746	F					SLC39A1;CRTC2	NM_014437;NM_181715	3'UTR;TSS1500	chr1:153930546-153931130	S_Shore		RDMR			1:153931954-153932201	Unclassified_Cell_type_specific
cg16274221	32750329	TAATAAATTAAAACTATCTAATCCAAACACTCCTAACACTAACAAACCCC			II			GTATGAATATATAATGAATTGAGACTATCTAGTCCAAACACTCCTGGCACTAACAGACCC[CG]TGACCACCAACACGTTACCCTCAATGCTGTCATTGGTGAGAGGGGCTTTTATAGCTCCTC	37	1	248568187	CGGGGTCTGTTAGTGCCAGGAGTGTTTGGACTAGATAGTCTCAATTCATT	1	246634810	R			TRUE		OR2T1	NM_030904	TSS1500
cg17102325	58691468	RAACTAACRAATATTACAATCRAAATCCTTATAATCATCACTCCACACAC			II			CGCATCTGGCTGTCTCTGGTCTTCATCTTCCGCGTGCTGGTGTACCTGGTGACGGCCGAG[CG]TGTGTGGAGTGATGACCACAAGGACTTCGACTGCAATACTCGCCAGCCCGGCTGCTCCAA	37	1	35223055	GGCTGGCGAGTATTGCAGTCGAAGTCCTTGTGGTCATCACTCCACACACG	1	34995642	F	rs61750026				GJB5	NM_005268	Body	chr1:35227028-35227276	N_Shelf				1:34995634-34995835
cg17456675	47795413	TATAACAACCTCATACCRAACCTTAAAAAATAATCCTTATAATAAAAACC			II			TGTGTACCGTGTGGGCCACAAGGGCAAGGTGGACCTCAAGTGTGTGGGCGAGGCAGCGGG[CG]GCTTCTACTACAAGGACCACCTCCCAAGGCTCGGTATGAGGCTGTCACACTGACTCCATC	37	1	1560531	GTGACAGCCTCATACCGAGCCTTGGGAGGTGGTCCTTGTAGTAGAAGCCG	1	1550394	F					MIB2;MIB2;MIB2;MIB2;MIB2;MIB2	NM_001170687;NM_001170688;NM_080875;NM_001170689;NM_001170686;NR_033183	Body;Body;Body;Body;Body;Body	chr1:1560780-1561055	N_Shore				1:1550307-1550865
cg17479763	35707319	CTCCCAAAAAAATCTAACAACTACTAATCCCCCAACCAAAAAAAACACCC			II			AGCCACCCCAACTCCCAGGAGAATCTGGCAACTGCTGGTCCCCCAACCAGAAGAGGCACC[CG]CCCTGCCTTCCTCCTAGAAGCTGGCTCAGACACCTGCCTCAATGCCAGAGCTGGCCAGGG	37	1	6237002	TCCCAGGAGAATCTGGCAACTGCTGGTCCCCCAACCAGAAGAGGCACCCG	1	6159589	R					CHD5	NM_015557	Body	chr1:6239237-6240814	N_Shelf
cg17848546	20780333	TCCCATAAAATCACATCCTCCAAAAAAACTACAAAAAACTAATTCAACAC			II			TGGCCCCACAGACCCACCTCCCCAACTCAGCACTGTCTGTCTGTGCAGCAGGTGCAAGGA[CG]TGTTGAACTAGCTCTCTGCAGCCTCCTTGGAGGATGTGATCCTATGGGAGGGGTAGGAGT	37	1	209605304	CCCATAGGATCACATCCTCCAAGGAGGCTGCAGAGAGCTAGTTCAACACG	1	207671927	F					LOC642587;MIR205	NM_001104548;NR_029622	Body;TSS200
cg18185008	24735301	AAATACAAAATTAAAAAAATTACAAAAAAACAATATCTACCCCTCCTCCC			II			CTGGAAGAAGAGGATGCAGAGTTAAGGAGGTTGCAGAGAAGCAGTATCTACCCCTCCTCC[CG]TGTTTGTTTGTTTGAGACAGAGTCTCATTCTGTCACCCAGGCTGGAGTGCAGCGGTGCAC	37	1	204589407	CGGGAGGAGGGGTAGATACTGCTTCTCTGCAACCTCCTTAACTCTGCATC	1	202856030	R					LRRN2;LRRN2	NM_006338;NM_201630	5'UTR;5'UTR
cg19773311	30761317	CAATCTCTTAAAAACCAACTCTAAAAAATCCCAATACAAAAATACCCCCC			II			ACGTAGCCATCCAGTCTCTTAGGGACCAGCTCTGGGGGATCCCAATGCAGGAGTACCCCC[CG]GGGTGTCCTCACTGCCACCAGACCCCGCGGAGGGGACAGGGGAGGCGGTATCTCTGTTGG	37	1	159900133	CGGGGGGTACTCCTGCATTGGGATCCCCCAGAGCTGGTCCCTAAGAGACT	1	158166757	R					IGSF9;IGSF9	NM_020789;NM_001135050	Body;Body	chr1:159899432-159899853	S_Shore
cg21410132	73793457	ACAATCCCAACACTCTCRAAAATCAATATAAAAAAATCATTTAAACCCAC			II			GACCCATGCCTACAATCCCAACACTCTCGGAGGTCAATGTGGGAGGATCATTTGAGCCCA[CG]GGTTCAAGACCAATCTGGGCAACATGGCAAAACTCCATCTCTACAAAATATTTTTTTTTG	37	1	13737267	CAATCCCAACACTCTCGGAGGTCAATGTGGGAGGATCATTTGAGCCCACG	1	13609854	R					PRAMEF20	NM_001099852	5'UTR
cg21809161	62714504	CAAACTCRACCTCTTTCTTTCCRCTAAATCACAAAACTAAAAAATACTAC			II			TCATAATGAATTCCCAGAACCTTTCCAAGCCAACCAGCAGGCACAGGCTCTCTCCCTACC[CG]CAGCACTTTCCAGCTTTGTGACTTAGCGGAAAGAAAGAGGCCGAGCCTGGATCCTGGGAG	37	1	59617037	AGGCTCGGCCTCTTTCTTTCCGCTAAGTCACAAAGCTGGAAAGTGCTGCG	1	59389625	F	rs72680175											TRUE				TRUE
cg22389615	26643452	CCRCATAACAAAAACAACTCCAACCCCRATAAATACAATCCTAAATATCC			II			GCCCCCTGCCACGTGGGCATCCAGGATTGCATTTACCGGGGCTGGAACCGCCCCGCCACG[CG]GACATCCAGGATTGCATTTACCGGGGCTGGAGCTGCCCCTGCCATGCGGGCATCGAGGAT	37	1	3204273	CGCATGGCAGGGGCAGCTCCAGCCCCGGTAAATGCAATCCTGGATGTCCG	1	3194133	F		rs6684917			PRDM16;PRDM16	NM_022114;NM_199454	Body;Body	chr1:3203765-3204453	Island				1:3193655-3194278
cg22530255	62677302	AAAACCAAACTAAACTCTTAAAACTACCTTACTATTTCCTAAAATACTCC			II			AGGGGCTTCTGGAAGGAAGGGCACTTTCCTCGGGAGCTCGCTCTTTATTTTGGGGGGCTG[CG]GAGCACCCCAGGAAACAGCAAGGCAGCTCCAAGAGTCCAGCCTGGTCCCCACCAGTGAAC	37	1	3051692	GGACCAGGCTGGACTCTTGGAGCTGCCTTGCTGTTTCCTGGGGTGCTCCG	1	3041552	F					PRDM16;PRDM16	NM_022114;NM_199454	Body;Body						1:3041232-3041798
cg22796025	15608455	TTATATAATCTTTCACAAATTAAAATCTCTAAACCTCAACTTCTTCCATC			II			TCATGTTTTATTCAATCATCATAACCATATGAAGTAGGGAAATTACCTCTATATCACAGA[CG]ATGGAAGAAGCTGAGGCTTAGAGATCTTAACTTGTGAAAGATCACACAACTAGTAATTGA	37	1	227509201	TGTGTGATCTTTCACAAGTTAAGATCTCTAAGCCTCAGCTTCTTCCATCG	1	225575824	F		rs77762169						chr1:227505446-227506752	S_Shelf
cg23016600	47678475	AATTATCTCAATATTCTAACACAATAAATCCACAATAAAACAACTTCCAC			II			TCCATTGTGCATGTATAGAAATGAGGCTCAGAAAACTCTAGGCATTTGTTAAAATTCACA[CG]TGGAAGCTGTCCCATTGTGGACTTACTGTGTCAGAATACTGAGACAATCATCTGGCCTGC	37	1	247698186	CGTGGAAGCTGTCCCATTGTGGACTTACTGTGTCAGAATACTGAGACAAT	1	245764809	F					OR2C3	NM_198074	TSS1500	chr1:247694035-247694501	S_Shelf
cg23024254	54694427	AAAAATCCCCATATCTTTTAACACAATCTAACCCAAAAAACAAAACAACC			II			AACTGCAGAGCCCCCTTAGAGGAGGTATATGCTTATGGTGGGAATGGAGGGTAGGAGAGA[CG]GCTGCCTTGTTCCTTGGGTCAGATTGTGCTAAAAGATATGGGGACCCCCAATTCCAGGTA	37	1	33433579	CGGCTGCCTTGTTCCTTGGGTCAGATTGTGCTAAAAGATATGGGGACCCC	1	33206166	F								chr1:33429531-33430513	S_Shelf
cg23774016	13795492	CACCTTTAACATCAACAACTACTTCCTACTCACAATCATAAAATATAACC			II			ATACAGGCCCTCTTACCCATGATGACTGAATACCTTAGGGGGTTGCAGATGGCCACATAG[CG]GTCATATCCCATGACTGTGAGCAGGAAGCAGTTGTTGATGCCAAAGGTGAGATAGAAGAA	37	1	159284082	CGGTCATATCCCATGACTGTGAGCAGGAAGCAGTTGTTGATGCCAAAGGT	1	157550706	F					OR10J3	NM_001004467	1stExon
cg24107338	26689308	CAACCAAAATAAACTCRAAAAAAACTCCCTTAAATAATTTTTTCTTACCC			II			CGTGATCCACCCGCCTCGGCCTCCCAAAGTGCTGGGATTACAGGCGTGAGCCACGGCGCC[CG]GGCAAGAAAAAATTATTCAAGGGAGTCTCTCTCGAGCCTATTCTGGCTGCCTATAAAAAA	37	1	153962020	AGCCAGAATAGGCTCGAGAGAGACTCCCTTGAATAATTTTTTCTTGCCCG	1	152228644	F					RPS27	NM_001030	TSS1500	chr1:153963227-153963510	N_Shore
cg25198007	22803349	AAAAACAAAACCCCTACTTTTTTCCAATCTACAACACAAACCRCATCATC			II			GGGGGTCAGGAGAGGACAAAGCCCCTGCTTTTTTCCAGTCTGCAGCACAAACCGCATCAT[CG]TACATGTAACCTCACTTGCCTTATCAAGGCATAGCTCCGAGGTCCCCGCTGTGGCACGAA	37	1	26611319	CGATGATGCGGTTTGTGCTGCAGACTGGAAAAAAGCAGGGGCTTTGTCCT	1	26483906	R					UBXN11;UBXN11;UBXN11	NM_001077262;NM_145345;NM_183008	Body;Body;Body			low-CpG:26483898-26483949				1:26610815-26612777	Promoter_Associated
cg26353598	56697335	ACTCAAAAAACTCRTTCCTCCACCTCCTATTAATAACACTATACCAAATC			II			ATAAGCTCCTAGCTCAAAGGACTCGTTCCTCCACCTCCTATTGGTAGCACTGTGCCAGGT[CG]TGTCCACTCACCACTGCAGACCCTTTCTCCAGCCTTCTCCTGCCTGCTCTGTGCCCCAGG	37	1	14824776	CGACCTGGCACAGTGCTACCAATAGGAGGTGGAGGAACGAGTCCTTTGAG	1	14697363	R												TRUE
cg27587063	14714305	TCTAAAACCTTCTTTAAAAATTCCTAAAACCTACTAACCAAAAAATACCC			II			GCAGGGTCGTCTCTAGGGCCTTCTTTGGGGGTTCCTGGGACCTGCTGGCCAGGAAATGCC[CG]TGAGTCCACAGACGCTTCTGCCAGCCCATGGCCCCTTGCGTGCAGAGATGCTGGTCCTGG	37	1	1912065	CGGGCATTTCCTGGCCAGCAGGTCCCAGGAACCCCCAAAGAAGGCCCTAG	1	1901925	R					KIAA1751	NM_001080484	Body	chr1:1910268-1913800	Island				1:1900088-1903738
cg00583299	19731441	ACTAATAAAAATAATCTTTCATTTTCCAAACCRCCAATATCAAAATCTTC			II			CTCAGGATGAGGCTGGTGAAAGTGGTCTTTCATTTTCCAAACCGCCAGTGTCAGGATCTT[CG]CTGCCATGGTCTTGTCTTTCAGATGCGATGGATGAGCTTGGTCCAGGGTGGTTGGGGATT	37	2	97485619	CTGGTGAAAGTGGTCTTTCATTTTCCAAACCGCCAGTGTCAGGATCTTCG	2	96849346	R					CNNM3;CNNM3	NM_017623;NM_199078	Body;Body	chr2:97481356-97483276	S_Shelf		CDMR
cg01255646	28621381	CATAAAATATCCATATAACRAAACRACACTCAACAACAAAACACACCRAC			II			TGGGCGCCGGTGTGTCTTTGTTGCTGAGTGCCGTCCCGTCATATGGACGTGCGTCGTGGG[CG]CCGGTGTGTCTTGTTGCTGAGTGCCGTCCCGTCATATGGACACCTCATGATTTGTTGGTT	37	2	241819381	CGCCGGTGTGTCTTGTTGCTGAGTGCCGTCCCGTCATATGGACACCTCAT	2	241468054	F	rs34247385												2:241467989-241468081
cg03209251	31756376	RTAACCTTTATACAACCTAAAAATACAACRCRAACCACAATAAACACAAC			II			CCTCGTGCCTGCCCAGCCCCTCCTCAGCCTCTGCAGAGCTGGGCCGGGAAGAGCCCCCCG[CG]CTGTGCCCACTGTGGCCCGCGTTGCACCCTCAGGCTGCACAAAGGCCACGTGTTACCTGT	37	2	240033164	TGGCCTTTGTGCAGCCTGAGGGTGCAACGCGGGCCACAGTGGGCACAGCG	2	239698101	F					HDAC4	NM_006037	Body	chr2:240033147-240033453	Island				2:239698035-239698379
cg03555914	71670351	AAAAAAACAAAAACACTCACCAACACTAAACCCAAACCCAACCRAAAAAC			II			AAGAGAATTAGAATGAAGTTGGTTGCTTTAGGAGCGAGCGGCGGTGTGAATCTGGGTCGG[CG]TTTCCCGGCTGGGTTTGGGCTCAGTGTTGGTGAGTGTCTTTGTCTTCTCTTTTAGGATTG	37	2	121554810	AGAAGACAAAGACACTCACCAACACTGAGCCCAAACCCAGCCGGGAAACG	2	121271280	F	rs35608167				GLI2	NM_005270	TSS200						2:121271254-121271433
cg04904388	51774339	TATTTTTAAATCTAAACAACACTAACTTAACTAATCACTCTCTCCTCTTC			II			CTCAGTCCTCATGTTTTTAGGTCTGGGCAGCACTGACTTAGCTGGTCACTCTCTCCTCTT[CG]AAGCACTTTACTTGGCTCCCAGGCCACCACACTCCCCTGGTTTTCTTCCTACCTCACCTC	37	2	74772791	GTTTTTAGGTCTGGGCAGCACTGACTTAGCTGGTCACTCTCTCCTCTTCG	2	74626299	R					LOXL3	NM_032603	Body	chr2:74776016-74776897	N_Shelf
cg05517438	65743391	ACCTAAAACCTAACTATAAAAAATAACAATCATAAATAAACAAACCACCC			II			GGACACTCAGCCCTCACTGCTTAAATAAAGATGGAGCCTCACCGGGCTGCTCTTCCTAAA[CG]GGTGGCTTGCTCATTCATGACTGCTACTTTCTACAGTCAGGCCCCAGGTTATGTCTCACC	37	2	227503673	CGGGTGGCTTGCTCATTCATGACTGCTACTTTCTACAGTCAGGCCCCAGG	2	227211917	F												TRUE
cg06410510	73615509	TATTACCATAACTAAACTCTCCCTCAACAATTTCAAATCCCTTTACTCCC			II			GGGCCAAGCTGCTTGCTGACTGGTCTAGCAGTGGAATTAGCCTGGGAAGAAGGGGGGTTC[CG]GGAGCAAAGGGATCTGAAACTGCTGAGGGAGAGCCCAGCTATGGCAACACAAGAGCCTGG	37	2	107458059	CGGGAGCAAAGGGATCTGAAACTGCTGAGGGAGAGCCCAGCTATGGCAAC	2	106824491	F					ST6GAL2;ST6GAL2;ST6GAL2	NM_032528;NM_001142352;NM_001142351	Body;Body;Body	chr2:107459523-107459882	N_Shore		RDMR			2:107457942-107458082	Unclassified_Cell_type_specific
cg06419236	28675490	CTCAACCCCAATCATCCTCCTAAAACTCTTTCCACCAACATTAATAAAAC			II			CCTTTGAGTTCAGCACCAGCAAGTCCAGCTCTCCTCCTCCTCGCGGCGTAGCTCTGGCGG[CG]CTCCATCAATGCTGGTGGAAAGAGTCCCAGGAGGATGACTGGGGCTGAGGTCGGCCATCA	37	2	240650018	TCAGCCCCAGTCATCCTCCTGGGACTCTTTCCACCAGCATTGATGGAGCG	2	240314955	F								chr2:240649998-240650205	Island
cg06658391	32771342	AAAATCACATACAAAAAACTAAACTAAACCTTCRTACTTACCCCAACCCC			II			ATTAAGCCAACACATATGTTTTGAATGAATGTGTGCACACATGCATGAGCTGGCGGCAGT[CG]GGGTTGGGGTAAGCACGAAGGCCCAGCTCAGTTCTCTGCATGTGACCTCCCATCTTACGC	37	2	113875233	CGGGGTTGGGGTAAGCACGAAGGCCCAGCTCAGTTCTCTGCATGTGACCT	2	113591704	F					IL1RN;IL1RN;IL1RN	NM_173843;NM_173841;NM_000577	TSS1500;TSS1500;TSS1500									TRUE
cg07557215	10772483	AACTAACCAACAAACACCTACTAAATCCTATAAAACRAAAACAAATAACC			II			CACAGAACCTGGGCTGGCCAGCAGGCACCTGCTGAGTCCTGTGGGGCGGAGGCAGGTGGC[CG]GCCACACCCGCGGCCCCAGGCTCAGCCTGCGCTTCCTGGGCAGTTACCGGACGCTGGTCT	37	2	132277798	CGGCCACCTGCCTCCGCCCCACAGGACTCAGCAGGTGCCTGCTGGCCAGC	2	131994268	R					LOC150776	NR_026922	Body						2:131994254-131994350
cg08692374	44782416	TAAATAAACACAAAATAAACACCRTAATAATAATCCCCAAAATACCCTCC			II			GCCTGACCTCCCTGAGGAAGGACAACACGGGCTATGACCTGAAGCAGCTGTTCATCGGGT[CG]GAGGGCACTTTGGGGATCATCACCACGGTGTCCATCTTGTGTCCACCCAAGCCCAGGGCT	37	2	242684212	CGGAGGGCACTTTGGGGATCATCACCACGGTGTCCATCTTGTGTCCACCC	2	242332885	F					D2HGDH	NM_152783	Body						2:242332732-242332886
cg09863248	63685427	AAAACATTTAACCATCRTACTCATTAAAATATACCRACAAACCRAATACC			II			CCGATGATTAACACCAGGTCGGCATGCTGAGAGAAAAACGACACAGACGCAGTGAGCGCG[CG]GCATCCGGTTTGCCGGCACATCCTAATGAGCACGATGGTCAAATGCCCTGGGTTTGCCAT	37	2	60154033	GGGCATTTGACCATCGTGCTCATTAGGATGTGCCGGCAAACCGGATGCCG	2	60007537	F													2:60007496-60007553
cg11704490	53745406	ATCCAAACAATTCTAAATACCCCCRACCCCAACATCAATTAAAAAAAACC			II			TCCCAGCTGGGGTCCAGGCAGTTCTGAGTACCCCCGACCCCAGCATCAGTTGAAAAGGGC[CG]CGGCCTGGGCTCTGGCCTAAGCGCGCAGCCTCTGTCCGCTGCTCTTTCAGAGCCAGGCCC	37	2	162284894	TCCAGGCAGTTCTGAGTACCCCCGACCCCAGCATCAGTTGAAAAGGGCCG	2	161993140	R								chr2:162283581-162284677	S_Shore				2:161992608-161993209
cg12035782	58607457	RAAAAACTTACATTTCCTATAAATTCTAAAATAATTTTTATCCCATTCCC			II			AGCTGTGCTCCGCCTCTACACCTGGCTCCACACGCGGGCTCGTCCGCGTGAGAGATGAGC[CG]GGAATGGGATAAAAACCATCCCAGAACCCACAGGAAATGCAAGTCCCTCGCCAGGTAGAG	37	2	232757030	AGGGACTTGCATTTCCTGTGGGTTCTGGGATGGTTTTTATCCCATTCCCG	2	232465274	F					MIR1471	NR_031717	TSS200
cg13100089	34625394	CCTCCTATACCCCACATAATACCTTCCAAAAACAAAAATAATATCCCTCC			II			AGTGAGGGGAGCCTCCTGTGCCCCACATGGTGCCTTCCAAGGGCAGGGGTGATGTCCCTC[CG]CAGTAGCTCCTGCCTTAGCACCTCCCTTACACAAACCCCCTGGGAGCTCTCCAAGGGTGA	37	2	31357523	CGGAGGGACATCACCCCTGCCCTTGGAAGGCACCATGTGGGGCACAGGAG	2	31211027	R					GALNT14	NM_024572	Body	chr2:31360321-31361821	N_Shelf
cg13295262	27637495	CTAACACTCTCCRCAACCTTTATTTTAAATTTTCCTCCCTATAAACTATC			II			TGGCCCTCCCTCTGACACTCTCCGCAACCTTTGTTTTGGATTTTCCTCCCTGTAAGCTGT[CG]CTGTTTCCCGTGTCTCTGTCGCCATTCCCTCGGTGGCCGGTGCGCAGGGGATACCAACGC	37	2	177355072	TGACACTCTCCGCAACCTTTGTTTTGGATTTTCCTCCCTGTAAGCTGTCG	2	177063318	R								chr2:177355071-177355525	Island			TRUE	2:177063199-177063907
cg13539203	22647353	AAATATATACTTTTTCTCCTCTTTCCCACTTTCCCCCAAACTACRAACAC			II			GGGCAGCCCCAAAATGTGTGCTTTTTCTCCTCTTTCCCACTTTCCCCCAGGCTACGGGCA[CG]CGGCACCCAGCACGGATGGCGGCAAGGTGTTCTGCATGTTCTACGCGCTGCTGGGCATCC	37	2	26950545	AATGTGTGCTTTTTCTCCTCTTTCCCACTTTCCCCCAGGCTACGGGCACG	2	26804049	R					KCNK3	NM_002246	Body	chr2:26950538-26951474	Island				2:26804049-26804924
cg14036457	10660507	ATAAAAAATCCACAAAAAACAAACTCTCAAACAAAATCCAACCRCCCAAC			II			CTCAACGGACAGTGAGGAGTCCACAGGAGACAGACTCTCAGACAGAATCCAGCCGCCCAG[CG]CCCAGACGCCCTTTACGCAGATGCCTCTGCGGGGAAGCAGCTTCCGTGCTGACATGAGCA	37	2	241839064	TGAGGAGTCCACAGGAGACAGACTCTCAGACAGAATCCAGCCGCCCAGCG	2	241487737	R		rs76408069											2:241487730-241487922
cg14687949	60801381	CCCAAAAACACACAATAAATTAAAACAAAACCRAAATCAAACACTAAAAC			II			TAATTACCTTGCCCAAGGGCACACAGTAGGTTAAGACAGGGCCGGGGTCAGACACTAGGG[CG]GCCTGACCCCCTCAGCCTTGCTCCTAACCACTCCGCCATCCTGCCTCCCCGGGCCAGGAC	37	2	121537346	CCAAGGGCACACAGTAGGTTAAGACAGGGCCGGGGTCAGACACTAGGGCG	2	121253816	R												TRUE
cg14879574	31752452	TAAATTCAATATTTCCRAATCAAACATCRCCTTAACAAAAACACTAAAAC			II			GCAGAGTCTCCTGTGATTATAATGACTATGATCCAGTCATAGAGACGGGATAAAGTGTAA[CG]CTTTAGTGTCTTTGCCAAGGCGATGTCTGATTCGGAAATACTGAACTTATTCAGTCTATA	37	2	200136686	CGCTTTAGTGTCTTTGCCAAGGCGATGTCTGATTCGGAAATACTGAACTT	2	199844931	F					SATB2	NM_015265	3'UTR
cg15123519	48613316	AAATCAAAACCTTCACTTTTCCATCTAAAATACCCTCCAAAACTAAAATC			II			ACGTCCCGTGGTAGAACAAATCTCTTTCGAACTTGGGTTGGCTGGAGAACTTTTCCCAAA[CG]ACTTTAGCCTTGGAGGGCACCTCAGATGGAAAAGTGAAGGCTCTGACTTTGGAGGGGAGG	37	2	136567270	CGACTTTAGCCTTGGAGGGCACCTCAGATGGAAAAGTGAAGGCTCTGACT	2	136283740	F					LCT	NM_002299	Body						2:136283614-136283741
cg17842997	23694490	ACAATAACCCTATAAAACACAAACCATCCCAAATACTAAATTCCAAACCC			II			GTTGGAAGGTTACAGTGACCCTATAAAACACAAGCCATCCCAGATGCTAGGTTCCAGGCC[CG]ATCTACTACTTACCTAAGTCAGCCTGTCATAATCTGAAATCATGATCCTCACTCCCAAAC	37	2	108941716	CGGGCCTGGAACCTAGCATCTGGGATGGCTTGTGTTTTATAGGGTCACTG	2	108308148	R												TRUE
cg18220058	58789352	TCRTTAAATTTTCACCAACTTATTACTTAAAATTATAATATAACCTATCC			II			CCTTATTTATTTTTAAAGTCAAACCACTAGGAAAATATATCACAGCCTGGAAACAGCAAA[CG]GACAGGCTATATTATAATTTCAAGTAATAAGTTGGTGAAAATTCAACGAAGTTGCTATCA	37	2	70523184	CGGACAGGCTATATTATAATTTCAAGTAATAAGTTGGTGAAAATTCAACG	2	70376688	F					FAM136A	NM_032822	3'UTR	chr2:70520468-70520999	S_Shelf
cg18827934	62670377	CAAATAAAAATCTAAACCCAAAATAAATACRACCCAAACCCCCAACCTCC			II			CTGCCCGTGCAGAGGGGCTTGCCCAGGTCCCCGACTGCTCGGGATTGGGGGAGCCCACAG[CG]GAGGCTGGGGGCCTGGGTCGCACCCACCCTGGGTCCAGATCCCCATCTGTGGGCAAGGGC	37	2	241732587	CGGAGGCTGGGGGCCTGGGTCGCACCCACCCTGGGTCCAGATCCCCATCT	2	241381260	F					KIF1A	NM_004321	Body					TRUE		2:241732465-241732728	Unclassified_Cell_type_specific
cg21638035	41671450	RTCCAAACAACAATTAACATCTAAAAACTTACTAATTATATACAAAACRC			II			GGGCTGACAGTGCGCCTCGCAGTGGGCTGGAACGCCTGTGCCCTCCTGGAGACGATCCGT[CG]CGCCCTGTACATAACCAGCAAGCTCTCAGATGCCAACTGCTGCCTGGACGCCATCTGCTA	37	2	241570135	CGCGCCCTGTACATAACCAGCAAGCTCTCAGATGCCAACTGCTGCCTGGA	2	241218808	F					GPR35	NM_005301	1stExon	chr2:241569691-241570138	Island				2:241218230-241218811
cg21859992	24786311	ACCAATACCATTCCAACAACAAAAAACRCCTCTACTAAATAATAAACCCC			II			AGTGTATTTTCCCAATGTGCCCGTGAGTTGGAAATGAATAATACCTGGTTGAAGGGGGCC[CG]GGGCCCATCACCTAGCAGAGGCGTTTTCTGTTGCTGGAATGGTATTGGCCCTTGAGATGG	37	2	128476855	CCAATACCATTCCAGCAACAGAAAACGCCTCTGCTAGGTGATGGGCCCCG	2	128193325	F					WDR33	NM_018383	Body
cg24105457	69672432	ATCTCTAAATATTTCCTAAAAAAACTAAATACTTCCAATTCAAAATCCCC			II			AAGTCCTTTGTATCTCTGGATGTTTCCTGAAAAGGCTGGATGCTTCCAGTTCAGAATCCC[CG]CCCCCACTCCCATCTAAGGAGATGTCATATAATTCCAGGTGAGCTGCTGTTGCCCAAATG	37	2	134600357	TCTCTGGATGTTTCCTGAAAAGGCTGGATGCTTCCAGTTCAGAATCCCCG	2	134316827	R												TRUE
cg25306875	31766375	CAAACTAAAAAACRCTCTAAATCACRAAAAAACCCCAAAAACAATCAACC			II			CCCCAGTTCAACAAGCTGGAAAACGCTCTGAGTCACGGAGGGACCCCAAAGGCAATCAGC[CG]CTCCCCGCCATCCTGAATCTTCTTCCGCTGTGGAAAAACCTGCGCTAGAGGAAACCGGCT	37	2	121372101	CGGCTGATTGCCTTTGGGGTCCCTCCGTGACTCAGAGCGTTTTCCAGCTT	2	121088571	R													2:121088475-121088579
cg25806190	38622440	CTTCATATAAACTAAACTCTATCCAAATAAAATTAATTTTACRAAAACTC			II			CCACTGCCTCCCTTCATATAGGCTGGACTCTATCCAAATGGAATTAATTTTGCGAGAACT[CG]CCTGTATTTTCTGTTTGCGCCTCTATTTTTATTTCCTTTTGCCAATAGTATGCTTTCCTC	37	2	232878174	TTCATATAGGCTGGACTCTATCCAAATGGAATTAATTTTGCGAGAACTCG	2	232586418	R					DIS3L2	NM_152383	5'UTR					TRUE
cg25997306	67738491	ACTCCTATATATATTTCTCTATTTTCCCCRAAAAACCRTACATAAAAAAC			II			AAGAAATTCCGGGAATTGTCCAGAAGATCCACAGGGTCAGAGACACACGCGCCAAAAAGG[CG]CCTTTCATGCACGGTCCTCCGGGGAAAACAGAGAAATATATATAGGAGCTCTCTGCCTTT	37	2	133104748	CGCCTTTCATGCACGGTCCTCCGGGGAAAACAGAGAAATATATATAGGAG	2	132821218	F	rs2459669												2:132821167-132821614			TRUE
cg27228210	18780414	CTCCCRTATACTATACTAATTAATTAAAAATTACCTCCCTTTAAATTCTC			II			TCCTTGGCTTCCTCCCGTGTGCTGTACTGGTTGATTAAAAATTGCCTCCCTTTGGATTCT[CG]TATCACAGTAGGGTCACAGGACAGTCTATATTGGAAGAAAGAGTCTCAGGACAAAGCACT	37	2	216420018	CGAGAATCCAAAGGGAGGCAATTTTTAATCAACCAGTACAGCACACGGGA	2	216128263	R												TRUE
cg01081718	13605317	ACACACTCTTAATTTAAAATTTTACATATACTCTTCCCTCTATCTAAAAC			II			AATAATGACTTAAAAACCTTAAGGAAAGGAACATGCCATAAGGCTGTTAAGTGCGAAGCG[CG]TTTCAGATAGAGGGAAGAGCACATGCAAAACCCCAAACCAAGAGTGTGCTTAACAGAATA	37	3	112278508	CACACTCTTGGTTTGGGGTTTTGCATGTGCTCTTCCCTCTATCTGAAACG	3	113761198	F					ATG3	NM_022488	Body	chr3:112280022-112280950	N_Shore
cg01130611	61789316	AAATTTTACTTACTCTAATACCTACACCTTTCAAATACTTAAAACTCCTC			II			AAGTGCTCAATAAATATTAGTCACCCTTATTCCTTATTGTAGTTATAGTTGTTACCTTCA[CG]AGGAGCCTCAAGCATCTGAAAGGTGCAGGCACCAGAGCAAGCAAAATCTCCCAGCCACTA	37	3	46885978	CGAGGAGCCTCAAGCATCTGAAAGGTGCAGGCACCAGAGCAAGCAAAATC	3	46860982	F	rs76855024							chr3:46887628-46887919	N_Shore
cg01326206	18738308	TTAAATCTTAAAAATTTAAAACRATATACAAAAACTACATCCTTTACTAC			II			GTAATTTACACTTAAATCTTAGAGATTTAAGGCGATGTGCAGAAACTACATCCTTTGCTG[CG]TTTTCTACCGGTGTTGGCTCTTTATCCCTAAAAGATAGTTGCTCTTCAAGTGTTTTAATT	37	3	47845672	CGCAGCAAAGGATGTAGTTTCTGCACATCGCCTTAAATCTCTAAGATTTA	3	47820676	R					DHX30;DHX30	NM_014966;NM_138615	5'UTR;5'UTR	chr3:47844121-47845155	S_Shore					3:47843749-47845688	Promoter_Associated
cg04411342	64680414	CCTCCCAAATTACAAACCACAACCAATACCTAAAAACATATATATATCCC			II			CGTTCACCTGCCCTCCCAGATTGCAAGCCACAACCAGTGCCTGGAGGCATATATGTGTCC[CG]GGGCTGAGAAATGCTTTTCTCTCCTGAGCCCTGCCAGACACTCTAAGCCACGCACGTTTT	37	3	133103339	CTCCCAGATTGCAAGCCACAACCAGTGCCTGGAGGCATATATGTGTCCCG	3	134586029	R					TMEM108;TMEM108	NM_001136469;NM_023943	Body;Body					TRUE		3:133102324-133104273	Unclassified	TRUE
cg07681739	72666352	AAATCCATTACTTAACAATAACCAAACCAAACTCCTTCCATAATACCCCC			II			TGAGGCTTGCTGGATCCATTGCTTGGCAGTGACCAAACCAAACTCCTTCCATAGTACCCC[CG]GCCACCTCCATCCACCCCAGGGCCAAGTACTCAGCTGCTCAGCACTCCTACTTAAGGTAA	37	3	49897407	CGGGGGTACTATGGAAGGAGTTTGGTTTGGTCACTGCCAAGCAATGGATC	3	49872411	R					CAMKV	NM_024046	Body	chr3:49893810-49894216	S_Shelf
cg14323117	58737463	TATCCTAAAAAAAACTATATAACTCTCTTACTCTTAACACCCCCTACCTC			II			CCCGCCTCACCCATCTCTCTCTCTCACACACACACACACACACACACACGAACACACACA[CG]AGGCAGGGGGTGTCAAGAGCAAGAGAGCTACATAGTCCCTCTCAGGACATTACAGCCCCC	37	3	14642610	CGAGGCAGGGGGTGTCAAGAGCAAGAGAGCTACATAGTCCCTCTCAGGAC	3	14617614	F								chr3:14643718-14644830	N_Shore		RDMR
cg14718995	53672371	TACCAAACACTAAAACCTTACAAAAACAACCTAATACAAAAACTAAAAAC			II			CCATTACAAAATGCCAGACACTGAGGCCTTACAAAGGCAGCCTAATACAAAGACTAAGGA[CG]TGGATCCTGGAGTTTGACTGCCTGGGGTGCATTGTAATGATTGGCTACTTATTAGGGAGG	37	3	3102321	GCCAGACACTGAGGCCTTACAAAGGCAGCCTAATACAAAGACTAAGGACG	3	3077321	R												TRUE
cg14844741	25792381	ATTTAAACAAAAAATAAACAAAACATCTATCCAAATCAAATAACTTCTCC			II			GACTTTATCCAGTTTGAACAGAGGATGGACAGAACATCTGTCCAAATCAGGTAACTTCTC[CG]AAACTTTCCTTTCCGGTGATTAAGCAAGTTAATAAAGTTGAGATTCTTTCAGTGCACAAA	37	3	45195950	CGGAGAAGTTACCTGATTTGGACAGATGTTCTGTCCATCCTCTGTTCAAA	3	45170954	R												TRUE
cg14920430	61671426	CTAACCTCAAATTAAAAAATAACAATATACCRACAACCCTCRAAACCCTC			II			TGAGCAGAGAGCTGGCCTCAGATTGAGAGGTGACAGTGTGCCGGCAGCCCTCGAAGCCCT[CG]CTCGCTCTTGGCGCCTCCTCGGCCTCGGCGCCCACTCTGGTCACGCTTGAGGAGCCCTTC	37	3	45348015	TGGCCTCAGATTGAGAGGTGACAGTGTGCCGGCAGCCCTCGAAGCCCTCG	3	45323019	R													3:45323010-45323506
cg17150789	20619334	AATTAAAAACCCCATACTACCTCCACCATCCCAAACAAATAAAATATCCC			II			GCTCACTCATCTTGAGGACAAATGGGAAAAGCCAGAAGCCAGAGGGGCACAAGGATGTCA[CG]GGATATTTCACCTGCCTGGGATGGTGGAGGTAGTATGGGGTTTTCAATCTCAAAGCGTCC	37	3	43097994	CGGGATATTTCACCTGCCTGGGATGGTGGAGGTAGTATGGGGTTTTCAAT	3	43072998	F					FAM198A	NM_001129908	3'UTR
cg17755508	56779488	TACTATAATCATCACCATTTTAAAAATAAAAACTAAAACACAAACCAAAC			II			CTCAAGTGATCTGCCCGCCTCAGCCTCCCAAAGTGCTGGAATTACAGGCATGAGCCACTG[CG]CCTGGCCTGTGCCTCAGTTTCTACCTCTAAAATGGTGATGATCATAGTAATAGCCATCTC	37	3	58290733	CGCCTGGCCTGTGCCTCAGTTTCTACCTCTAAAATGGTGATGATCATAGT	3	58265773	F					RPP14;RPP14	NM_007042;NM_001098783	TSS1500;TSS1500	chr3:58291813-58292385	N_Shore
cg18461436	62809376	ATACCACATCACTAACCACAACTAATCTCCTCAAATTTAATATATATCCC			II			AAGAAGGTGAATGAGGTTCACGAATCTAGAGTCTGAAGGATTTGGCCCGGAACTAGAGGG[CG]GGACACATACCAAATTTGAGGAGACCAGCTGTGGTTAGTGATGTGGCATGGGACCGGAGG	37	3	149096828	TGCCACATCACTAACCACAGCTGGTCTCCTCAAATTTGGTATGTGTCCCG	3	150579518	F					TM4SF1	NM_014220	TSS1500
cg18572650	18642388	TCAATATCACTTAAAAACTTATTAAAAATCTTAAACCCCAAAACAAACCC			II			ACCCGGAGGGTGAGTTAAAACATGGAATGCTGGGCTCCACCCCCAGACTTTCTGATTTAG[CG]GGTCTGTCTTGGGGCCCAAGATTTCTAACAAGTTCCCAAGTGATACTGATACTGGTCCAG	37	3	120449890	CGGGTCTGTCTTGGGGCCCAAGATTTCTAACAAGTTCCCAAGTGATACTG	3	121932580	F					RABL3	NM_173825	Body					TRUE
cg18718692	43678438	AAACTCCATAATTAAAAAATACTCCTAATTTTTTCAATAAATCTAACCTC			II			AGAACAAAAGAAAACTCCATAATTGAGAAATGCTCCTGATTTTTTCAGTGAATCTGGCCT[CG]TGGAGCTGCAGGAGGCCCCCACCAGGCCCCCACCCCTTTCCAGGCCTAGAGGAAAGGCCA	37	3	133121913	CGAGGCCAGATTCACTGAAAAAATCAGGAGCATTTCTCAATTATGGAGTT	3	134604603	R					BFSP2	NM_003571	Body					TRUE
cg19497451	18769397	ATATCCAAAAATCCACAACRCCRCTAAATCAATTCACCTTAATACAAAAC			II			TCTAGGATGATGTGGAGGGATAAGGGGAGTCCTGGGAACAATGGGGCTTGGAGAATGGCT[CG]TTTTGCATTAAGGTGAACTGATTTAGCGGCGCTGTGGACCTCTGGACATGCTGCCCACTG	37	3	134331952	TGTCCAGAGGTCCACAGCGCCGCTAAATCAGTTCACCTTAATGCAAAACG	3	135814642	F	rs9838119				KY	NM_178554	Body					TRUE
cg19790002	32724318	AAATACTAAACTCCTCATTACCCAAAAAAACAATACCAACAAACTACTCC			II			ACGCCAAGCTTGCGGGCCAGATGGAGTTCCGGGTGGGCCTGGGCTTGGCGGCCCGGCACT[CG]GAGCAGCCTGCTGGCACTGCCTCCCTGGGCAATGAGGAGCTTAGCACCCCGGCCAGCGGC	37	3	78157630	CGGAGCAGCCTGCTGGCACTGCCTCCCTGGGCAATGAGGAGCTTAGCACC	3	78240320	F													3:78240289-78240662
cg19952454	63655450	AAAAACAATAAAATACAAAAACAATAACCTTTAACTAATAACCAAATAAC			II			TTCCAACCCAGGAGGTGTTTACAAACTTAGGGACATAAACCAGGGAAAGTCTATGAGAGC[CG]TTACTTGGTCACCAGCCAAAGGTCATTGCCTCTGTACCTCATTGTCTTTATCACCTTATG	37	3	185501320	AAGACAATGAGGTACAGAGGCAATGACCTTTGGCTGGTGACCAAGTAACG	3	186984014	F					IGF2BP2;IGF2BP2	NM_001007225;NM_006548	Body;Body					TRUE
cg19979666	39751425	AAAAAAACTTCCRCATTTTAAAAAATTTCCAAATAAAACCAATAACAAAC			II			AGTTGGGGTGGGGGGAGACTTCCGCATTTTAAAGGATTTCCAAGTGGAGCCAGTAGCAAG[CG]GGGATTGGCCTAGAGGCAGCTTGATTAACTTATCCCAGTTTCTTCAGGCAAAGCTGGTAC	37	3	127006462	GGGAGACTTCCGCATTTTAAAGGATTTCCAAGTGGAGCCAGTAGCAAGCG	3	128489152	R													3:128488909-128489329
cg21735741	72804389	CATCCAACTACCTATATACTCTTCTACCAATATATTCCTCTCACTATCCC			II			GCTCCTCTCGACATCCAGCTGCCTGTGTGCTCTTCTACCAGTGTGTTCCTCTCACTGTCC[CG]CAGCTCGTGTGTTCTTTCTCCGGTGCGCTCCTCTCAACGTACGTGCGCTCCTCTCAACGT	37	3	80819488	CGGGACAGTGAGAGGAACACACTGGTAGAAGAGCACACAGGCAGCTGGAT	3	80902178	R								chr3:80819487-80819788	Island				3:80902073-80902478
cg24444655	71754306	TAAACCAACCAATCAATAACTCAAACAAATAAACCAACATACATCCCRCC			II			GTCCTGCGGCTGCACCCTAATGGCGGCTTTGGCAAACTCCTTCAGCATCTTCGGCAGCTC[CG]GCGGGATGCATGTTGGCTTATCTGTCTGAGCCATTGATTGGTTGGCCTATTCTCAGGAGA	37	3	123699293	CGGCGGGATGCATGTTGGCTTATCTGTCTGAGCCATTGATTGGTTGGCCT	3	125181983	F		rs7622201			ROPN1	NM_017578	Body						3:125181804-125181987	3:123697901-123699646	Unclassified
cg26228531	54650345	TAAATAAAAAATATCAATTCTAAACCACAAAATTATCTAAACAACACAAC			II			CGCAGTGCTATACATAAAAGGAGCTTAGTTCAACCATCCTAGGAAAGAAGTCGTCACAAA[CG]CTGTGCTGTTTAGACAATCCTGTGGCCCAGAATTGATATTTTCCACTTAAACTTCCCAGT	37	3	135956534	CGCTGTGCTGTTTAGACAATCCTGTGGCCCAGAATTGATATTTTCCACTT	3	137439224	F	rs76248483											TRUE
cg00704873	15607455	TATCTCCTTTTTATATTCCAAATCTCTAATAAAATTCCCATCATTCCCCC			II			GAATTCACATCTGTCTCCTTTTTATGTTCCAGATCTCTGGTGAAATTCCCATCATTCCCC[CG]ACTTTCTTGAATAATCAATCAGTTACCAAAGTCCCTGCCTCCTGCCTCCAGCATTTAAGT	37	4	868858	CGGGGGAATGATGGGAATTTCACCAGAGATCTGGAACATAAAAAGGAGAC	4	858858	R					GAK	NM_005255	Body	chr4:870695-870969	N_Shore
cg01369033	34772378	TCAAAAATACCTCCTTAAACAACTATAACCTATAAACTATAAATAAAACC			II			ACTTGTTCAACTCAGGAGTGCCTCCTTAAGCAACTGTAGCCTATGAGCTGTGGGTAGGGC[CG]CTGAGCCGCTGCCTGGCAGGCACGGAAGAGCAGGTGCACGCTTCTCCATGGCCCTCCCTG	37	4	3292386	CGGCCCTACCCACAGCTCATAGGCTACAGTTGCTTAAGGAGGCACTCCTG	4	3262184	R								chr4:3293714-3294595	N_Shore
cg02182794	23617459	AATCTTAATCATCAACCAAAATTTTACCACAACAATTTCATTCTCTTATC			II			TAAAATATATTACTTGCTTAATGTTTGCACTCTGAAGTATACTTTGACACATACAAGTTC[CG]ATAAGAGAATGAAATTGCTGTGGCAAAATCCTGGCTGATGATCAAGACTTGGAGAGTTTT	37	4	13369795	GTCTTGATCATCAGCCAGGATTTTGCCACAGCAATTTCATTCTCTTATCG	4	12978893	F					RAB28;RAB28;RAB28	NM_001017979;NM_004249;NM_001159601	3'UTR;3'UTR;3'UTR
cg02239163	52631375	ACTCTATTCTCCTTCATATCTCTTTCATTATTAAATACTAATCTCRACTC			II			TCGTCATCAGCCAGCCTGTCCAGACTGAAGGAGGCAGCAGGGGGCTGGAAATCCGCTTCC[CG]AGTCGAGACCAGCATTTAACAATGAAAGAGACATGAAGGAGAATAGAGTAGGACGTAGGG	37	4	7720084	CTCTATTCTCCTTCATGTCTCTTTCATTGTTAAATGCTGGTCTCGACTCG	4	7770984	F					SORCS2	NM_020777	Body						4:7770753-7771093
cg02257884	36719484	CCCACCCAAATAAACCAACTAAAAACTCRAACCTAACCAAAACTTCTACC			II			GGTACTGCCTGCCCACCCAAATGGGCCAGCTGGGGACTCGGGCCTGGCCAGGGCTTCTGC[CG]TCCCCTCCACGTCATCCATGAAGAACACGCGCTCCTCCTCGTCACTGCCTGACCGCAGGC	37	4	2306840	CGGCAGAAGCCCTGGCCAGGCCCGAGTCCCCAGCTGGCCCATTTGGGTGG	4	2276638	R					ZFYVE28	NM_020972	Body	chr4:2306274-2306904	Island				4:2275998-2277047
cg03420978	14740428	TCCTTTTTCTAAACAAACTTTACAAACTTTACAACATCTTCCTTAAATAC			II			AGCCCCTGTGTGAGGACACAGGAATTCCTCTTGGGATACAGGGAAGGCCCCCAGCTGAAT[CG]TATCCAAGGAAGATGTTGCAAAGCTTGCAAAGCTTGTTCAGAAAAAGGAGCCCAGCTTGA	37	4	37542310	CGTATCCAAGGAAGATGTTGCAAAGCTTGCAAAGCTTGTTCAGAAAAAGG	4	37218705	F					C4orf19	NM_001104629	5'UTR					TRUE
cg07855438	70792429	TTAAAATATTATTACATCRTAAATCTATAAAAAACCAAACCCCTTACTCC			II			TGGGTATGTGGTTAGGGTATTATTACATCGTAGGTCTATAAAGGGCCAAGCCCCTTGCTC[CG]ACATGCAAAGAAAGGATTGCAAACTGGCAGGCTGCAGGTCATACCGTGCTCATAGACAGC	37	4	56251840	CGGAGCAAGGGGCTTGGCCCTTTATAGACCTACGATGTAATAATACCCTA	4	55946597	R		rs28418730										TRUE
cg10744305	31777480	CAAAAAAAACCCTATCAATCCCATTCCACTCAAACCTATATAATAAAAAC			II			TCTCTCCTAGCAGAGGTGGTGGGAGGGGTTGGAATTTGGATGACAAGGATCTGTTTGTGC[CG]CCTTCATTACACAGGCCTGAGTGGAATGGGACTGATAGGGCTTCTTCTGGTTTCTGCTTC	37	4	146656680	AGAAGAAGCCCTATCAGTCCCATTCCACTCAGGCCTGTGTAATGAAGGCG	4	146876130	F		rs28491610						chr4:146653994-146654615	S_Shelf							TRUE
cg11222703	25646500	CAATTACTCTTAACAAACAAATAAACCCTAAAAACATAAATAACTTCCCC			II			GATCTTTTTCACAATTGCTCTTAACAAGCAGGTAGACCCTGAGAACATGAGTAGCTTCCC[CG]CAGGTAACTTGAGTGCATGAGAACTTTTGCTTTACAACCATGCCAATCTCACCTCAGCAG	37	4	190983569	CGGGGAAGCTACTCATGTTCTCAGGGTCTACCTGCTTGTTAAGAGCAATT	4	191220563	R								chr4:190986382-191013609	N_Shelf
cg13255629	10720428	CAACAAATCCTATTACCATTTTTCCCCAAACTTCTTCAAAATATAACCAC			II			ATCTGGTACCTCAGCAAATCCTATTACCATTTTTCCCCAAACTTCTTCAGAATATGACCA[CG]TCTCATCATCCCTTCTGCCGCACTCAGGTTCAAGCCTCCATCATCTCTGGCTGGGATTAT	37	4	88752660	CGTGGTCATATTCTGAAGAAGTTTGGGGAAAAATGGTAATAGGATTTGCT	4	88971684	R				TRUE	MEPE	NM_020203	TSS1500
cg13491848	55643321	TAATATTTAATCCACATTATAATAAAAAAAACTACCCAAACTCTAAACTC			II			GCAATACAGGGTAGTATTTGATCCACATTATGGTAGAAAGAGCTGCCCAAACTCTGAACT[CG]TACTAGTTCTTATTTATCAAAGTAACACCCAAGATTCTAAAAGCTTTGGAGGGACTTCTT	37	4	120991796	CGAGTTCAGAGTTTGGGCAGCTCTTTCTACCATAATGTGGATCAAATACT	4	121211244	R								chr4:120987617-120988156	S_Shelf					4:120991736-120991803	Unclassified_Cell_type_specific
cg15377758	21602506	TAACATACACAAATACTCAATAAACATCTAAAACACRAACTTCCTCCCCC			II			CGGACTGTGCCTGGCATACACAGGTACTCAATGAGCATCTGGAGCACGAGCTTCCTCCCC[CG]CCTCTCCCAAGCCTTGGCTCCTGCTACCCTGAGAACTGCCGGAAGGGCAAAAGCGCGTCC	37	4	1052676	CGGGGGAGGAAGCTCGTGCTCCAGATGCTCATTGAGTACCTGTGTATGCC	4	1042676	R		rs79067760						chr4:1049652-1049923	S_Shelf				4:1042514-1042762
cg15460584	11715506	ACTCTCAATACCCATCTTATACATCCCCAAAAATTTTATTTTCATCAAAC			II			ACTGGTGACTCAGGCCTCTGTCTTCCTCTGCCAGTGGGTCATGGGATGAGTTGAAGACAA[CG]TTTGATGAAAACAAAACTTCTGGGGATGTATAAGATGGGTACTGAGAGCAGGTGGGACCA	37	4	8540687	CTCTCAGTACCCATCTTATACATCCCCAGAAGTTTTGTTTTCATCAAACG	4	8591587	F	rs62287452											TRUE		4:8540233-8541134	Unclassified_Cell_type_specific	TRUE
cg17431301	10780493	AAATCACTACTAAATTTTACAAATCATATACCTAATAAAAAACTTCTATC			II			GATGAAAAGATAAATCACTACTAAGTTTTGCAAATCATATACCTAATAAAGGACTTCTAT[CG]AGAAAATATTTTAAAAATCCAAGTAACAACAATTTTTTTTTCTTCTGAGACAGGGTCCTA	37	4	910018	AATCACTACTAAGTTTTGCAAATCATATACCTAATAAAGGACTTCTATCG	4	900018	R					GAK	NM_005255	Body	chr4:908737-909040	S_Shore			TRUE
cg17879352	39752500	ATAAATAAATAACCCTAAAAACCCCTAAAACAATAATTTATTTACTACAC			II			CACAGGCATGGGTGGGTGAGTGGCCCTGAAGGCCCCTGAAGCAGTGATTTGTTTGCTGCA[CG]TCTGTGCGAAAGCCACACGGAGCCATCAGTGTGGGCGCCTGTCGCAGGGCGGGCACAGCC	37	4	1319092	CGTGCAGCAAACAAATCACTGCTTCAGGGGCCTTCAGGGCCACTCACCCA	4	1309092	R					MAEA;MAEA	NM_005882;NM_001017405	Body;Body	chr4:1320098-1320301	N_Shore				4:1309092-1309172
cg20567630	15791480	AATAAATCCCCCACAACAAAAAAACAACCRTACTATAATCTCCTACTACC			II			GTTCAAGGACAAGGAGAAAGAGAATTTGGGAGAGATGATTTGAGTAGGCCAGACTGGAAG[CG]GCAGTAGGAGATTACAGTACGGCTGCTTCCTTGCTGTGGGGGATTTATCTTTGTACTCTT	37	4	188588839	CGGCAGTAGGAGATTACAGTACGGCTGCTTCCTTGCTGTGGGGGATTTAT	4	188825833	F		rs74796665										TRUE
cg20823529	35605502	ATATCCCCTAAACACACAAAATACAAAAAACCCRTAATATCCACAAAAAC			II			CCGCAGGGACGGTGTCCCCTGAGCACACAGGATGCAGGGAACCCGTGGTGTCCACAGGGA[CG]GTGTCTCCTGAGCGCACAGGATGCAGGGAACCCGGGGTGTCCGCAGGGACGGTGTCCCCT	37	4	730453	TGTCCCCTGAGCACACAGGATGCAGGGAACCCGTGGTGTCCACAGGGACG	4	720453	R					PCGF3	NM_006315	Body	chr4:730282-731005	Island				4:720343-720990
cg21538834	69793346	CCAATTAATACTCCAATTAATCACACTTAACAACTCCCTAAAAAAACAAC			II			TGCGGCCTCTGCCAATTAGTGCTCCAGTTAATCACACTTAGCAACTCCCTGGAGAAGCAG[CG]AAGCCGGGAGGAGCCCAGCGTGGGAGACCCCCTCAGGCTGGCTCTGCCGAGACGGAGATG	37	4	183729461	CGCTGCTTCTCCAGGGAGTTGCTAAGTGTGATTAACTGGAGCACTAATTG	4	183966455	R								chr4:183727549-183728353	S_Shore				4:183965959-183966972
cg24358467	45792393	CAAAAATCAAACAAAAAATCAAAACRTACRTATAAAACAACACCAAAACC			II			AATTGCAGGGGCAGGGATCAGGCAAGAAATCAGAACGTGCGTGTGAGACAGCACCAGAAC[CG]AGTGACAAGATCCTTTGGGCCAGAGAGCGACCCTCGGAGAAGGTGAGCTGTCTGCCCGTC	37	4	7812736	CGGTTCTGGTGCTGTCTCACACGCACGTTCTGATTTCTTGCCTGATCCCT	4	7863636	R					AFAP1;AFAP1	NM_198595;NM_001134647	Body;Body						4:7863548-7864479
cg00986130	73796368	ACTACTTAACATAACTAATTAACTCAACTAATTCCCCTCAACCCTTACCC			II			ATGCCTCCCCAGGGTCACAAGTGGGACATAGCAGGGCTAGAATTACAAGGCCCTGGGTCT[CG]GGCAAGGGCTGAGGGGAATTAGTTGAGCTAATTAGTCATGCTAAGCAGCATTCGGCTCTC	37	5	177821799	CGGGCAAGGGCTGAGGGGAATTAGTTGAGCTAATTAGTCATGCTAAGCAG	5	177754405	F	rs67319660				COL23A1	NM_173465	Body	chr5:177821852-177823865	N_Shore
cg02087079	29720373	RAACTTTCCTAAAACTTCACCTCATATCAAAACTAAACAACCAACACCTC			II			ATCCGGCGACGGAGGCCCGGCCTGGCCACTGCCTGGCGTTTTCTCATAAACCAGCTTTCA[CG]AGGTGTTGGCTGCTCAGTCTTGACATGAGGTGAAGCCTCAGGAAAGCCCGGGGCTGTTCA	37	5	177811349	CGAGGTGTTGGCTGCTCAGTCTTGACATGAGGTGAAGCCTCAGGAAAGCC	5	177743955	F					COL23A1	NM_173465	Body						5:177743753-177744255
cg09637885	34739481	CTCCCTCCTTCTAAATCAAAACCTATTTCCTTCCAAAATAATAAACCCCC			II			GCACCAATTTCCTCCCTCCTTCTGGATCAGAGCCTGTTTCCTTCCAAAGTGGTGGACCCC[CG]AAATCTTACAGGCTTTTTTTTTTTTTTTTTTTTCCTCTGTCTCACTCTGTCGCCCAGGTA	37	5	55032952	CGGGGGTCCACCACTTTGGAAGGAAACAGGCTCTGATCCAGAAGGAGGGA	5	55068709	R					DDX4;DDX4;DDX4	NM_024415;NM_001142549;NM_001166533	TSS1500;TSS1500;TSS1500	chr5:55033694-55033993	N_Shore
cg10663557	63753347	TCAAATAACAAAAAAAAACCTCTCTAAACACTTATATCCAAATAAAACTC			II			CTGGGCCAGAGACAGGCAGGGCCCAGTCCAGGGGCCCCAGGCCTCCCCAGTCCCAGTGTG[CG]AGCCCCACTTGGACACAAGTGTTCAGAGAGGTCCCCCTCTGCCACTTGACAGGGACCTTC	37	5	175309346	CAAGTGGCAGAGGGGGACCTCTCTGAACACTTGTGTCCAAGTGGGGCTCG	5	175241952	F					CPLX2;CPLX2	NM_006650;NM_001008220	3'UTR;3'UTR							5:175309208-175309431	Unclassified_Cell_type_specific
cg10874992	64707439	ATTTAACCACTCTAACACATACTAAATACCTAACCAATCATCTCCCAACC			II			CCTCCTCGGTCCTGGTAAGGCACGAAGGTGGAGAGTTTGAGGGCGCTGCTCTTGGTCCGG[CG]GCTGGGAGATGACTGGCCAGGCATCCAGCATGTGTCAGAGTGGCCAAACTCACTGCACTC	37	5	141233893	TTTGGCCACTCTGACACATGCTGGATGCCTGGCCAGTCATCTCCCAGCCG	5	141214077	F	rs13340352				PCDH1	NM_032420	Body	chr5:141233566-141233894	Island				5:141213830-141214078
cg16339915	30801471	CCTAAAAAAAAACAATACCCTACTAACCTTCTACCTCAAAACCCTAAACC			II			CTCAGGGGGACCTGCTCCAGGTACCTCAGCGTCAGCCCATTGACCCACACACAGCCCTTG[CG]GCTCAGGGCCTTGAGGCAGAAGGCCAGCAGGGCACTGCCTTTCTCCAGGTAGGGCTCCAG	37	5	134785391	CGGCTCAGGGCCTTGAGGCAGAAGGCCAGCAGGGCACTGCCTTTCTCCAG	5	134813290	F					TIFAB	NM_001099221	Body
cg18836287	67759447	CACCAATATAACTTTAAACCAATATTCAATTCCCATAACTAATTCRAAAC			II			AGCAGGGATGACACCAATGTGGCTTTAAACCAGTGTTCAATTCCCATGGCTGATTCGGAA[CG]TCCTGAGGCAAAACGTGAAGTTTACTGCATCCGAGGAAGGAAGTGCAGCACCCACAGCAG	37	5	1145044	ACCAATGTGGCTTTAAACCAGTGTTCAATTCCCATGGCTGATTCGGAACG	5	1198044	R													5:1197950-1198045
cg24065270	36730488	ATATATACAAATCTTCAAAATAACCCAAAACCRACCRAATAATTTAAACC			II			CCCTGGTGCAATGGTGTGCTCTGCCGGCCCCCATTCTGTCTGAACTTTAATGGTACACCA[CG]GTCCAAACCATCCGGCCGGCCCTGGGCCATCCTGAAGACCTGCACACATCTTAAATGGAA	37	5	142005152	CGGTCCAAACCATCCGGCCGGCCCTGGGCCATCCTGAAGACCTGCACACA	5	141985336	F					FGF1;FGF1;FGF1;FGF1;FGF1;FGF1	NM_000800;NM_033136;NM_001144935;NM_001144934;NR_026696;NR_026695	5'UTR;5'UTR;5'UTR;5'UTR;Body;Body					TRUE
cg24096745	48785356	CTAAAAATCTAAAACACACTATAAACRAAAACRAAACCATCACCTACCCC			II			CCTAAACCCACCTGAAAGTCTGAGGCACACTGTGAGCGGGAACGAAGCCATCACCTGCCC[CG]GAAGGCCCCTTCCGCTTGGAGCAGCACCGTCTGCCCGGAGTTCCCAGCAGTCTCCCAAAG	37	5	180071916	CGGGGCAGGTGATGGCTTCGTTCCCGCTCACAGTGTGCCTCAGACTTTCA	5	180004522	R					FLT4;FLT4	NM_002020;NM_182925	Body;Body	chr5:180075688-180076906	N_Shelf				5:180004422-180004589	5:180071891-180071978	Unclassified_Cell_type_specific
cg24808105	49715399	AAAAAATTATCTACATTTCAAACTTATTAAACATTCTCTCCCCCCAAAAC			II			TCAGAAGCAATAAGGAGTTGTCTACATTTCAGGCTTGTTAGACATTCTCTCCCCCCAAAA[CG]TGTTTTCCTGGTGACTAGGAATGCATTTCAAAGTTAGATTTTTTTTTTTTTTTACCAATT	37	5	148339194	AGGAGTTGTCTACATTTCAGGCTTGTTAGACATTCTCTCCCCCCAAAACG	5	148319387	R		rs5872103										TRUE
cg25599786	38720382	AAACCAAAACAACACAAATTAAAACACAAACRAAATATTAACRCCRCAAC			II			ACCATCACGGCACACTCCATGCGTGCCCGTCCAGATGGCACCTGAGCCTCCCTGTGCCTG[CG]CTGCGGCGTTAACATCTCGCTTGTGTTTTAACCTGTGTTGCTTTGGTTTAAAACTTGTTT	37	5	301105	CGCTGCGGCGTTAACATCTCGCTTGTGTTTTAACCTGTGTTGCTTTGGTT	5	354105	F					PDCD6	NM_013232	Body						5:353768-354114
cg25951075	41616510	ATAACCCAATAAACAAAAACCAAAAAATACCTCACTATTTTACAAATACC			II			GTCTCCTGTGCCCGTATGGCCACTGTGGGGGGGGGGGGGGCGGGCAGCAGGCCACAGGGT[CG]GCATTTGCAAAATAGTGAGGCACTCCCTGGCCTCTGCCCACTGGGCCACTGAGGCAGGGC	37	5	179528386	CGGCATTTGCAAAATAGTGAGGCACTCCCTGGCCTCTGCCCACTGGGCCA	5	179460992	F					RASGEF1C	NM_175062	3'UTR
cg00053135	24680335	ACATCAAAACAAAAATCTAAACRCTTACAACCCTAAAAAACACACTAAAC			II			CGCTCAGGAAGACATCAGGACAGAGGTCTAGACGCTTACAACCCTGAGAGACACACTGGA[CG]CTGCGCGCAAGAGCCCTGTGCATATGGACTCCGATTGACGCCATCAGATTCGCCCACAAG	37	6	167032403	CATCAGGACAGAGGTCTAGACGCTTACAACCCTGAGAGACACACTGGACG	6	166952393	R					RPS6KA2;RPS6KA2	NM_021135;NM_001006932	Body;Body	chr6:167032330-167032582	Island				6:166952321-166952557
cg04822548	52665397	CTACATTACTCTCTAAATATACCAAAACATACCRTAAACTTTCATCCTAC			II			GTCTCCTGGAGCTGCATTGCTCTCTGGATGTGCCAGAACATGCCGTGGGCTTTCATCCTG[CG]TCACTCGACTGGGAATGCCCTGGGATCCTGCAGGTGCCCACCCAGCTGGCTCCCTCCGGG	37	6	161836946	CGCAGGATGAAAGCCCACGGCATGTTCTGGCACATCCAGAGAGCAATGCA	6	161756936	R					PARK2;PARK2;PARK2	NM_004562;NM_013987;NM_013988	Body;Body;Body					TRUE	6:161756936-161757378
cg07184423	38748350	AAAACAAAACTACTTAAATCCCAACTCAATAACTTACTAACTATATAATC			II			TGTAGTAGTTTAAAGCAGAACTACTTAAATCCCAGCTCAATGACTTACTAGCTGTGTAAT[CG]TAGAGAAGTTACTTATCCTCTGTGTCATTTTAAAAATAGAGATAATAAACTGTATCCACT	37	6	139294818	AAGCAGAACTACTTAAATCCCAGCTCAATGACTTACTAGCTGTGTAATCG	6	139336511	R					REPS1;REPS1	NM_001128617;NM_031922	Body;Body					TRUE
cg12966376	34645363	ATACCACTACCCTTCAACCTAAAAAATAAAACRACTCTATCTCCAAAAAC			II			GAGCCAAGATTATGCCACTGCCCTTCAGCCTGGGGGATAGAGCGACTCTGTCTCCAAAAA[CG]AGAGAGAAAAAAAAAAAGAAACCAAAAAACTCACATGTACCCCATAGATACGTATGACTA	37	6	32177664	TGCCACTGCCCTTCAGCCTGGGGGATAGAGCGACTCTGTCTCCAAAAACG	6	32285642	R					NOTCH4	NM_004557	Body
cg15925143	40735443	ATATACTAAACRCAAAATACCRTCCCAAAAAACRAACAACACAACCCTAC			II			CCGTGCTGCCCAGCCACAGCCCAGAGAGACAGAAAGGTGGAGACTCACGGCAGGGCCGCA[CG]CAGGGCTGTGTTGTCCGCTTCCTGGGACGGTACCCTGCGTCCAGCACACTCACGGCCAGG	37	6	170575847	CGCAGGGCTGTGTTGTCCGCTTCCTGGGACGGTACCCTGCGTCCAGCACA	6	170417772	F	rs9366191							chr6:170575833-170576800	Island			TRUE	6:170417759-170418908
cg17327665	73710419	TAACCTCTCAACAACTATATCATCCCCTTATTCCAACTATCCCTAAAACC			II			GCAGTCCAGGCTGTTCTTCGAGCTGACACCAAGCGATTGAAGCTGCTGGAAGAGGAGCGG[CG]GCTTCAGGGACAGCTGGAACAAGGGGATGACACAGCTGCTGAGAGGCTAGAGAAGGTAGA	37	6	30552052	AGCCTCTCAGCAGCTGTGTCATCCCCTTGTTCCAGCTGTCCCTGAAGCCG	6	30660031	F		rs61741255			ABCF1;ABCF1;MIR877	NM_001090;NM_001025091;NR_030615	Body;Body;TSS200
cg17400829	35669309	AAAATCTCATAAAAATTTCTTAAATTAATAACAAACAACAAAAACRATAC			II			TGCCTTCTATTTTTGAGGCCTTTGCTGAAACTCCAGAGACAATAGGAAGAACCCAGTTAA[CG]TACCGTCCCTGTTGTCTGTCATCAATTCAAGAAATTTTTATGAGACTTCTGATGAAGATG	37	6	43340655	CGTACCGTCCCTGTTGTCTGTCATCAATTCAAGAAATTTTTATGAGACTT	6	43448633	F								chr6:43336480-43337832	S_Shelf
cg17968511	63762300	ACRTTATAATTCTTCAATATCTAAAAAAAAACACCCTCAATCATACACCC			II			GCTCCTGCCCGACGTTGTGGTTCTTCAGTGTCTGGAAGGAGGCACCCTCAGTCATGCACC[CG]CATTCCCACACCTGCTGCTTCTCGGGCCTGCAATGTTCGCCCCTGCCCCACTTGCCCTCA	37	6	166205611	CGGGTGCATGACTGAGGGTGCCTCCTTCCAGACACTGAAGAACCACAACG	6	166125601	R													6:166125398-166125763
cg19124225	59708418	AACATATCTAAACCAAAACAACTCCTACATTAAATCCCCCAAAATACCCC			II			ATTATTTATTATTTATTTATTATTTATTTATTTACAGATGAATGTATTTATTTGGGAGAC[CG]GGGTATCCTGGGGGACCCAATGTAGGAGCTGCCTTGGCTCAGACATGTTTTCCGTGAAAA	37	6	31545836	CGGGGTATCCTGGGGGACCCAATGTAGGAGCTGCCTTGGCTCAGACATGT	6	31653815	F					TNF	NM_000594	3'UTR	chr6:31548436-31549277	N_Shelf
cg20982690	65797403	TACTAAATAACAATAATAACRAAACCCCAAATACCACCCAAAACTCRAAC			II			CTAATCACTCAAATCATCTACAGATGCCTTCCGTGCACATGCCAATGCCTTCCGTGCACA[CG]CCCGAGCCCTGGGTGGCATTTGGGGCCTCGCCACCACTGCTACCCAGCAGCTCCCAGCAG	37	6	170048394	CGCCCGAGCCCTGGGTGGCATTTGGGGCCTCGCCACCACTGCTACCCAGC	6	169790319	F					WDR27	NM_182552	Body						6:169790290-169790350
cg22693055	42642303	TATAATCAAAATATAAATATAACCAAAATTACCTACATCTATTCTAACCC			II			CCTGCTTTGCTGGTTGGTGGGCACCTGGGGGATGAGGTAAACTGAGGCTTAGCATATGGA[CG]GGCCAGAACAGATGTAGGCAACCCTGGTTATACCCATACCCTGATTATAGCATTTCTGTG	37	6	107897986	CGGGCCAGAACAGATGTAGGCAACCCTGGTTATACCCATACCCTGATTAT	6	108004679	F					SOBP	NM_018013	Body					TRUE
cg23949519	70753478	TATTAACCACATTTCAAATAATCAACACCCACATATAACCACTAACTACC			II			TGCTATCCAACAGATCCTTTTGTAGTGATGGAAATGTCCTTTGATCTGTACTGTCCAATA[CG]GTAGCCAGTGGTTATATGTGGGTGCTGACTACTTGAAATGTGGCTAATACAACTGAGGAG	37	6	143768292	CGGTAGCCAGTGGTTATATGTGGGTGCTGACTACTTGAAATGTGGCTAAT	6	143809985	F					ADAT2	NM_182503	Body	chr6:143771610-143772084	N_Shelf
cg25949002	67634321	AAAAATCATTCTTATATAAACAATATTACTAAATAACATAACAAACTTTC			II			TTCTGACCTTGTGATCCCCTGGTCTTAGCCTCCCAAAGTGCTGGGATTACTGCACCCAGC[CG]AAAGCCTGTTATGTTATTTAGCAACACTGCTTACATAAGAATGATCCTTGATGTTAGACT	37	6	32301073	AGGATCATTCTTATGTAAGCAGTGTTGCTAAATAACATAACAGGCTTTCG	6	32409051	F					C6orf10	NM_006781	Body
cg00435616	41637463	TATAAACTAAAACAAAATATATACAAACCACACATACACAAAAACCTAAC			II			AAGAGATAAGCTATGGACTGGGACAAAATATGTACAAACCACACATACACAAAAGCCTAG[CG]TCTAGAACACATAAACAACGAGAAGGCGCAGCTCGGAGCAGGGCTGGGAGGATGAGCAAA	37	7	1080473	CGCTAGGCTTTTGTGTATGTGTGGTTTGTACATATTTTGTCCCAGTCCAT	7	1046999	R					C7orf50;C7orf50;C7orf50	NM_001134395;NM_032350;NM_001134396	Body;Body;Body	chr7:1080835-1081069	N_Shore							TRUE
cg01433527	51630368	RAAAAATACRAACTAATAACRAAAATAAAAACACTACCCCACACRCAACC			II			TGCCATGTGGAGAGGCCAAGCGGGGGACAGGGGCGGCTTGTCCGCCAGGTGGCACCGAGG[CG]GCTGCGTGTGGGGCAGTGTTCCCACTCTCGTCACCAGCCCGCACTTCCCGCTGCCTCTGA	37	7	82541	GGAAGTGCGGGCTGGTGACGAGAGTGGGAACACTGCCCCACACGCAGCCG	7	177624	F								chr7:82324-82592	Island				7:177408-177815
cg04089246	30686381	TTAAAACTTCTCCCAAAACAATTTCCCATTCTCCTTTCTAACTAAAAACC			II			CTTGGGCTCACTTGGGGCTTCTCCCAAGGCAGTTTCCCATTCTCCTTTCTGGCTGAAAAC[CG]CTGTCCTGGGCTCAGTTGAAGATCCGCCCCCCATCTGACCTCCCAGACTGGTTAATCATC	37	7	47579217	TGGGGCTTCTCCCAAGGCAGTTTCCCATTCTCCTTTCTGGCTGAAAACCG	7	47545742	R					TNS3	NM_022748	TSS200	chr7:47576519-47577210	S_Shelf	low-CpG:47545717-47545752
cg06203307	56612345	CTTCTATTAACTCTATTAATACCATCCTCATCCCACTACCCRAATAACTC			II			GCTCAGGGTTCAGGGGGTACGCTAGACTCCTCTCCCCATTCGATTCTTGCATTTGGCAGA[CG]AGTCACCCGGGCAGTGGGATGAGGATGGCACCAACAGAGTCAACAGAAGGAAGACGGCTC	37	7	47694857	TTCTGTTGACTCTGTTGGTGCCATCCTCATCCCACTGCCCGGGTGACTCG	7	47661382	F	rs74838059				C7orf65;C7orf65	NM_001123065;NM_001123065	1stExon;5'UTR
cg07023501	33774372	CRTCCCCACTTATTCTATATCTACACCCRCATTATATCCACACCTATAAC			II			ACAAGTGGGGACGTCACAGGTGTGGACGTGGTGCGGGTGTAGACGTAGAACAAGTGGGGA[CG]TCACAGGTGTGGACACAATGCGGGTGTAGACATAGAACAAGTGGGGACGTCACAGGTGTG	37	7	155948572	GTCCCCACTTGTTCTATGTCTACACCCGCATTGTGTCCACACCTGTGACG	7	155641333	F	rs72118948							chr7:155946843-155948654	Island				7:155641186-155641383
cg08514594	26704441	AAATTCTCRAACCAACAATAACCTTCAAAATAAACRCCAATATCCAAAAC			II			GCGTGTACGTGTGTGTGGAAACAGCCTCACCTGTGGCCTTCTCCACATCCTCAGTGGTCA[CG]TTTTGGACATTGGCGCTCACTTTGAAGGTCACTGCTGGTCCGAGAACCCTGGAAGGGATA	37	7	157874020	GGTTCTCGGACCAGCAGTGACCTTCAAAGTGAGCGCCAATGTCCAAAACG	7	157566781	F					PTPRN2;PTPRN2;PTPRN2	NM_002847;NM_130842;NM_130843	Body;Body;Body						7:157566580-157566824
cg08549573	40787472	TAAAATAAAACTCRAAACCTAAAATAACCTATAATCAACTTTTTCTTCCC			II			CTGGCCGCTGCTGGGATGGGGCTCGGGGCCTGGGATGGCCTGTAATCAGCTTTTTCTTCC[CG]GCAGCGCCGCAAGCGTCCTATTCCATACTACCGGCCCAGCCCCTCTTCCTCCTCCAGCTG	37	7	75914927	GGGATGGGGCTCGGGGCCTGGGATGGCCTGTAATCAGCTTTTTCTTCCCG	7	75752863	R					SRRM3	NM_001110199	Body	chr7:75911818-75912496	S_Shelf				7:75752863-75753002
cg08604987	40724331	TATACAACACACTAATCCCAAATCCCTTTAAAAACCTAAAAACTAAATCC			II			TCGTTGAAGGTGGAAGAAACCGGCATGTCCAGGGTGGGGCCTTACTGTGGAAAGAAGGGC[CG]GACTCAGCTCCTAGGCCCCCAAAGGGATCTGGGACCAGTGTGCTGCACAGCTGTGTCCCC	37	7	57269554	GTGCAGCACACTGGTCCCAGATCCCTTTGGGGGCCTAGGAGCTGAGTCCG	7	57273496	F								chr7:57270847-57271464	N_Shore
cg09512004	42777338	ATTTAAAACAATAAACCAACCAAATTCCCRAAAAACCTCCTACTTCCCTC			II			GAAGCTAACATGTTTGGGACAGTGAGCCAGCCAGGTTCCCGGGAGGCCTCCTGCTTCCCT[CG]CCTGACTGCACTTACGCCTTCTCGGAGACTGACTTCTCCTTTGCTTCTTACCATGAGGCT	37	7	158802917	TTTGGGACAGTGAGCCAGCCAGGTTCCCGGGAGGCCTCCTGCTTCCCTCG	7	158495678	R					LOC154822	NR_024394	Body	chr7:158798591-158799434	S_Shelf				7:158495457-158495679
cg10586510	19793469	CCAAAACTCAAACCTAAACCTATTCTTTCCAAAAATACCCCCATCTTACC			II			AAGCTCGTGCTCTGGTCGGGTAAGTGCGGCGGAGCCGGGTCTGGGGGGCGGGAGGTGCCG[CG]GTAAGATGGGGGCACCCTTGGAAAGAACAGGCTCAGGCCTGAGTTTTGGAGAGGGCGGGG	37	7	128829365	CAAAACTCAGGCCTGAGCCTGTTCTTTCCAAGGGTGCCCCCATCTTACCG	7	128616601	F					SMO	NM_005631	Body	chr7:128828333-128829366	Island		DMR		7:128615343-128616672			TRUE
cg11537828	41669324	TCTCACAACTCTAAAAACCAAAAAACCAACACTAAAAAACCAACAAAACC			II			AAAATTCACTCTCTCACAGCTCTGGAGACCAGGAGGCCAACACTGAGGAACCAGCAGGGC[CG]TGATCTCTCTGCAGGCTCAGGCAAGGGTCCTTCCTTCCCTCTTCATGGTTCCGGTGGCTG	37	7	155322173	CGGCCCTGCTGGTTCCTCAGTGTTGGCCTCCTGGTCTCCAGAGCTGTGAG	7	155014934	R					CNPY1	NM_001103176	5'UTR	chr7:155325811-155326357	N_Shelf					7:155322142-155322243	Unclassified_Cell_type_specific
cg13289321	47619458	CCTTACCTTCTAACAAACAATACTAACTAAAAACRTAAACTATATCTCCC			II			GGGTCGCTGGTATCAAAGACGGAATCAGGAGCCAGGCCAGTACTGGAGTCCGCGAGGATG[CG]GGAGACACAGCCCACGTCCCCAGCCAGCACTGCCTGCCAGAAGGCAAGGGCAGGTCCTGA	37	7	150884003	CGGGAGACACAGCCCACGTCCCCAGCCAGCACTGCCTGCCAGAAGGCAAG	7	150514936	F				TRUE	ASB10;ASB10;ASB10	NM_001142460;NM_080871;NM_001142459	1stExon;Body;1stExon
cg13322072	47671301	CAAACCAATCATAACCTTACCAAAACAACTCCAAATAAACCCCAAAACCC			II			GAAGTGTACTTCAGGCCAGTCATGGCCTTACCAGGGCAGCTCCAAATAGGCCCCAGAACC[CG]GGGGTAAGCAACTTCTTAGAGAATTTACTTCTCCACTTTGGGAGGCCGAGGCGGATGGAT	37	7	98784083	AGGCCAGTCATGGCCTTACCAGGGCAGCTCCAAATAGGCCCCAGAACCCG	7	98622019	R					KPNA7	NM_001145715	Body
cg13619623	31734429	CTAATACCACAAATATCCCAAAACTAATACAAATTCCCCTCCTTCCTATC			II			AAGCAAATCCATTAAGATCTTCCTGCAAAAAAAAAATGTGTTATTGAGAAAGCCCTGGTG[CG]ATAGGAAGGAGGGGAACCTGCACTAGCTCTGGGACATTTGTGGCATCAGTTCCCCTCTCT	37	7	33637324	TGATGCCACAAATGTCCCAGAGCTAGTGCAGGTTCCCCTCCTTCCTATCG	7	33603849	F					BBS9;BBS9;BBS9;BBS9	NM_001033604;NM_014451;NM_198428;NM_001033605	Body;Body;Body;Body					TRUE
cg15364355	70740398	ATTAAAAACACTAAAAATAAATCRCTATCTCTCTTTTTCTCTAAAAATCC			II			ACCACTGTACTGTTAGAGACACTGAGAATGGATCGCTGTCTCTCTTTTTCTCTAAGAATC[CG]TTTGATGGGAAGCATGAATCTTAGTTACTATGAATACTGTTTTCATCCCAGCCTACCTCA	37	7	127567722	CGGATTCTTAGAGAAAAAGAGAGACAGCGATCCATTCTCAGTGTCTCTAA	7	127354958	R					SND1	NM_014390	Body					TRUE
cg17001464	41649326	TCATATTAAAAAACACRTTTTCTCTCTTTTCCCCAACTCCAAAAACTACC			II			TAAGTGCAATACCAAGGGGCAAATAAGAAGCCAAACTGTGGAAAATGAACAGGGGAGCAG[CG]GCAGTTCTTGGAGTTGGGGAAAAGAGAGAAAACGTGTTTTTTAACATGAAAATGTTTGTC	37	7	130679521	CGGCAGTTCTTGGAGTTGGGGAAAAGAGAGAAAACGTGTTTTTTAACATG	7	130330061	F					FLJ43663;FLJ43663	NR_015431;NR_024153	Body;Body					TRUE
cg17580613	15697502	AAATTCTAAAATACCAACTACRATATTAAATCACAAAACTTAAAAACTAC			II			TCCCTGCGGCGTCCCACGCCCCCAAAACCCCCCACCCCCCCACCCGTGCCAGGAATCTAT[CG]CAGTTCTCAAGTCCTGTGACTTAATACCGCAGCTGGCACCTCAGAATTCCTTATTCTTAC	37	7	23338304	CGCAGTTCTCAAGTCCTGTGACTTAATACCGCAGCTGGCACCTCAGAATT	7	23304829	F					C7orf30	NM_138446	TSS1500	chr7:23338797-23339264	N_Shore					7:23338181-23339614	Promoter_Associated
cg18990588	17779300	CTTCTTCATAACTATAACTTACAACAAAATCCTTTAATCTATTTCTTCAC			II			TCTGTCTTCAGGTGCGAAAACTGCGTTTTCTTCTTGAGTTCCGTGTTTCAGGGAGAGAAT[CG]TGAAGAAACAGACTAAAGGACTTTGTTGCAAGCTACAGTCATGAAGAAGGACACGTGGGT	37	7	175713	CGTGAAGAAACAGACTAAAGGACTTTGTTGCAAGCTACAGTCATGAAGAA	7	270796	F	rs78710493							chr7:178517-179127	N_Shelf				7:270487-271058
cg19028499	15764305	TTACATACTAATAATACAATCCCCRAAAACAAACAAAACATCCATTACAC			II			CTATAAATAATGAAAAAATCACAGTAATGACCAGAAATGTGTGTGAGGCGTCGCGGCGAG[CG]TGTAATGGATGCTTTGTTTGTCTTCGGGGACTGTATTACCAGCATGTAACTGATTAGGCT	37	7	3096493	TACATGCTGGTAATACAGTCCCCGAAGACAAACAAAGCATCCATTACACG	7	3063019	F	rs74827164												7:3063007-3063149
cg20998127	10738358	TCCAAAATACCTACTCCTACAACATTCTATAAAATTCAAAACACCATCCC			II			ATCTGTGGGATTCCAGGATGCCTGCTCCTGCAGCATTCTGTGGGATTCAGGGCACCATCC[CG]TGGATTCCAGGATAATTGCTCCTGAACCCTTCCATGGCATTCTGGGAGGCCACTTGGCCT	37	7	158859224	CGGGATGGTGCCCTGAATCCCACAGAATGCTGCAGGAGCAGGCATCCTGG	7	158551985	R					VIPR2	NM_003382	Body	chr7:158856817-158857209	S_Shelf							TRUE
cg23167506	51753479	CRCACCCATTTATCTTACTATAATTAAAAATACAAACATTATAAAATCAC			II			GCCCTCGTGCCCCCGGAGTTTATTTGCACCTCACTCCTCCATAGCTGCCACCAGCACTGG[CG]TGATTTTATAATGTTTGCACTTTCAACTATAGCAAGATAAATGGGTGCGATTACCCCGCT	37	7	1303302	GCACCCATTTATCTTGCTATAGTTGAAAGTGCAAACATTATAAAATCACG	7	1269828	F													7:1269704-1269829
cg23568324	23788504	CCTAAACCTCRAACCTCAAAAATTAAAAACAAAAACACAAAATTAACCCC			II			CAGCCTGGCGACCTGGACCTCGGACCTCAGGAGTTGGGGACAGGGACACAAAGTTGGCCC[CG]ACCCCGGCTCCCACGTGGCCGCTGCTGGCTGCACGTCCTCCAGGCACGGCCAGGAGCTCA	37	7	2678248	CGGGGCCAACTTTGTGTCCCTGTCCCCAACTCCTGAGGTCCGAGGTCCAG	7	2644774	R					TTYH3	NM_025250	Body						7:2644722-2644810			TRUE
cg25311271	64768338	AAACTATATTTTTAAATTCCTTCCTCAACTTCCCTAAACAATACAATCTC			II			TCTTCCCAGGGCGCGACGGGGTCCTGGCGCGCACCCGAGGGGCGGGCGCTGCCCACCCGC[CG]AGACTGCACTGTTTAGGGAAGCTGAGGAAGGAACCCAAAAATACAGCCTCCCCTCGGACC	37	7	55087519	GGCTGTATTTTTGGGTTCCTTCCTCAGCTTCCCTAAACAGTGCAGTCTCG	7	55055013	F					EGFR;EGFR;EGFR;EGFR	NM_201283;NM_201284;NM_201282;NM_005228	Body;Body;Body;Body	chr7:55086141-55088105	Island				7:55053636-55055599
cg27520905	70747413	ATATCCTACTAAAATCAAATTACTTAAACTTTAACCAACCAAACCCCACC			II			AGGCTCCTGATGACAGATGGGTGAATGGCAGAGTAGATGAGTGAGGGAGGTGGGGAGCCC[CG]GTGGGGCCTGGCTGGTCAAAGTCCAAGCAATCTGATCCCAGCAGGACATTCCTTTGAAGG	37	7	153999655	TGTCCTGCTGGGATCAGATTGCTTGGACTTTGACCAGCCAGGCCCCACCG	7	153630588	F					DPP6;DPP6	NM_130797;NM_001039350	Body;Body	chr7:154001964-154002281	N_Shelf
cg27629384	72710362	TCAATTTCCATTTTTCCACTTATAACRACTATTACAACCRCTATTTCATC			II			ACGCGGTCTCTTCAGTTTCCATTTTTCCACTTGTAACGGCTGTTACAGCCGCTGTTTCAT[CG]CGTCGTCATAGGAGTTGAACAAAGCTGTGTGTGTGTTTCCAGAATGTTGGCACAGCGGCG	37	7	157577757	CAGTTTCCATTTTTCCACTTGTAACGGCTGTTACAGCCGCTGTTTCATCG	7	157270518	R					PTPRN2;PTPRN2;PTPRN2	NM_002847;NM_130842;NM_130843	Body;Body;Body	chr7:157577685-157577942	Island				7:157270115-157271646
cg00696685	27772420	AACACCAACAACACAAAACAAACCAATATACCCAAAACCATAACAACCAC			II			CTCCACATACACCCCAGCTATGCTCCTGGCCTGGGGCCTGGGGGGCGTGCCGGCTCCCAG[CG]TGGCTGCCATGGCTCTGGGTACACTGGCCTGCTCTGTGCTGTTGGTGCCTGGGACGGGAA	37	8	144947335	GCACCAACAGCACAGAGCAGGCCAGTGTACCCAGAGCCATGGCAGCCACG	8	145019323	F	rs74594612				EPPK1	NM_031308	1stExon	chr8:144944614-144945388	S_Shore					8:144947059-144947600	Unclassified_Cell_type_specific
cg05276226	65746509	AACAAATTTTATACAAACACCTATACTTACATCTAACATTTCCCCTCCCC			II			AACGTCTCTGCAACAAATTTTGTGCAAACACCTATGCTTGCATCTGGCATTTCCCCTCCC[CG]CCCTGCGGAAGTGGCCCAGCTCTCAGAGCTCCTCAGACCTCACCCCCAGGGTCCTGGGGC	37	8	39441968	ACAAATTTTGTGCAAACACCTATGCTTGCATCTGGCATTTCCCCTCCCCG	8	39561125	R					ADAM18	NM_014237	TSS200
cg06626168	67772397	AAAAATTCCRCCCACTAAACTTAATAAAAATATCACACTAACCCTTCCCC			II			TTTAAAAAAGAAAAGATTCCGCCCACTAAACTTGATAAAAGTATCACACTGGCCCTTCCC[CG]GGCCCTGGCCAGGCTGCCACGCCTTCTCCCCTCCCCCTGCGCCAGGTCCCCAAATCCAGA	37	8	61834373	AAGATTCCGCCCACTAAACTTGATAAAAGTATCACACTGGCCCTTCCCCG	8	61996927	R								chr8:61834699-61835871	N_Shore		RDMR
cg07148318	60722307	CTAAACTAAACCRAAACCCAAACAACRAAACAAACACRAAAAATAAAAAC			II			TTCTCCGGGCCCTGGACTGGGCCGAAACCCAGGCAGCGGAGCAGGCACGGGAGGTGGGGA[CG]CCGCTGGACCCTGGAGCCCTCGGGCGGGGTCCCTCAGCACGAAAGAGGCACGGGAGTGCG	37	8	145115260	TGGACTGGGCCGAAACCCAGGCAGCGGAGCAGGCACGGGAGGTGGGGACG	8	145187248	R					OPLAH	NM_017570	5'UTR	chr8:145114550-145115828	Island			TRUE	8:145186581-145187950	8:145114686-145116059	Unclassified
cg09259595	30775371	TCCTCCCACTAAAAATAAACTTCTATAAACRTAAACTCAACTCATCTCTC			II			GGAGCCATGGCAGGCGAGGCGCCAAGAGAATGGGGTCATTGCCTGAAATGCCACTGGAGC[CG]AGAGATGAGCTGAGCCCACGTCCACAGAAGCCCATTCCCAGTGGGAGGAACAGCGTCTGC	37	8	1779056	CCTCCCACTGGGAATGGGCTTCTGTGGACGTGGGCTCAGCTCATCTCTCG	8	1766463	F	rs76177837				ARHGEF10	NM_014629	5'UTR	chr8:1779620-1779821	N_Shore				8:1766361-1766527
cg11885565	39610436	ATACCCTCATAATACTAAAATAACTAAAACAAAACTACCRACATCAAACC			II			TCCTGTCCTAGGTGCCCTCATGGTGCTGGGGTAGCTGAGACAGAGCTGCCGACATCAGGC[CG]CGACGGGCAGGATGCTTGTGCTTTCTGATGTTCTCAGTCTTTCTTGTTTGCCTAAAGTAC	37	8	869333	CGGCCTGATGTCGGCAGCTCTGTCTCAGCTACCCCAGCACCATGAGGGCA	8	859333	R												TRUE
cg14485877	31620375	AAATCATTTCTTCAAAAAAACRACAAAAACRCRCTCCTAATCTAATCAAC			II			CCCCAGCTCAGGAATCATTTCTTCAAGGAAGCGGCAGAGACGCGCTCCTGATCTGATCAG[CG]TCTGCACGAAGCACGGCTTCTGCTCCTTCCCACTCCCTGACCAGGAGCTCCAGCCACATA	37	8	1592736	CGCTGATCAGATCAGGAGCGCGTCTCTGCCGCTTCCTTGAAGAAATGATT	8	1580143	R					DLGAP2	NM_004745	Body	chr8:1590038-1592282	S_Shore				8:1579841-1580144
cg15164446	71615454	ATCTAAATTAAACCTAACCTAACTCTACAAAAAAAACCRACCCTCCTCCC			II			CTGCAGGCTCCCGCCGGCCTGGCCTCCGGGGGCTTCACGGGCTGAGAACCGTTCAAGCTG[CG]GGAGGAGGGCCGGCTCCTCCTGCAGAGCTAGGCCAGGCCCAACCCAGACCCAAGGGAGAA	37	8	143782355	CGGGAGGAGGGCCGGCTCCTCCTGCAGAGCTAGGCCAGGCCCAACCCAGA	8	143779357	F					LY6K;LY6K;LY6K	NM_001160354;NM_017527;NM_001160355	Body;Body;Body	chr8:143781581-143782609	Island				8:143778550-143779976			TRUE
cg15639838	72605414	ATAACCAAAAACAATATAAAAAACAACCTAAAAAACAAAAATCCTTCTCC			II			GCAGGTGCTGGAGCAGCCCCCCTGGAAGTGATGCAGCATCCAGGAAGACGGAGGAAGGGG[CG]GAGAAGGACCTCTGCTTTCCAGGCTGCCTTTTATACTGCCTCTGGTCACCTGACGTGGAA	37	8	12034388	TGACCAGAGGCAGTATAAAAGGCAGCCTGGAAAGCAGAGGTCCTTCTCCG	8	12071797	F		rs74322226											8:12071702-12071798
cg15654892	62747509	AATATTTATAAATTAACCAAAAATCAAATTATAACCTCTAAAATCCCTTC			II			GCATTGTAGAGGGTATTTGTGAATTAGCCAGAGGTCAGATTATAACCTCTGAAGTCCCTT[CG]AACTCTAATTCTGCTCCTGCATCTGGGTCAGCTGACTCCTGGCCCAATGCACTATCCATC	37	8	60834013	CGAAGGGACTTCAGAGGTTATAATCTGACCTCTGGCTAATTCACAAATAC	8	60996567	R												TRUE		8:60833886-60834423	Unclassified_Cell_type_specific
cg15682797	73719331	CRATATACATAAAAACCTTTAATCATTCCTACAACCATTTATCTTTACTC			II			ACGTGTGTCTCCGGTGTGCATAGGAGCCTTTGATCATTCCTGCAGCCATTTATCTTTGCT[CG]CAAGTTTCATTCAACAAATTACCGAGTGTCTGGGATGCGCCAGGGCCGTACTGGGGCTAC	37	8	1049394	GGTGTGCATAGGAGCCTTTGATCATTCCTGCAGCCATTTATCTTTGCTCG	8	1036801	R								chr8:1048559-1048873	S_Shore				8:1036734-1036885
cg16474701	57672509	ACCCRACCACACTAACRAAATTTATTTATACAAATATATAAATCTCCCCC			II			AACCAAGTCAGACCCGGCCACACTGGCGGGGTTTATTTATGCAAGTGTGTAAGTCTCCCC[CG]GCATGCACATTTATAGCCACTGAGCTGTCTTGTCAATTACTACCTTTTTAAATACAAAAG	37	8	27321661	CGGGGGAGACTTACACACTTGCATAAATAAACCCCGCCAGTGTGGCCGGG	8	27377578	R					CHRNA2	NM_000742	Body	chr8:27320914-27321276	S_Shore
cg19515984	67688481	AAAATAAAAAAAACTTCTTTTAAAATACTCTCAACATCCCCAACTATCTC			II			GAGCATGGGCTGGCCGAAGGGACTCAGTGGGATATTGAGCTAGGCGGAGACGAGAAGAGT[CG]AGACAGCTGGGGATGCTGAGAGCATCCCAAAAGAAGCCTCTCTCATCCCAGAAGCCCCCA	37	8	47160830	CGAGACAGCTGGGGATGCTGAGAGCATCCCAAAAGAAGCCTCTCTCATCC	8	47279995	F	rs77201035												8:47279644-47280223
cg19913199	71706482	CAACTTCTAACCCAAATACTAAACCCCTCATTACCTAAAACTTACCTACC			II			GTCGAGCACAGCAGCTTCTGGCCCAGGTGCTAAGCCCCTCATTACCTGGGGCTTGCCTGC[CG]GCCGGCCACTCCCAACATGGGGCCCGCGGAGCCCACGCCCACCCGGAATTCGTGCTGGCC	37	8	60674791	AGCTTCTGGCCCAGGTGCTAAGCCCCTCATTACCTGGGGCTTGCCTGCCG	8	60837345	R													8:60837345-60837486
cg20083442	55666478	TTATTCTCTAAATTTACATACATTACTATAACCCCCAAAACCTATTCAAC			II			CTGATTTCTTATTGTTCTCTGAGTTTGCATGCATTGCTGTAGCCCCCAGGACCTATTCAA[CG]TTCCCAAGTGCATCAAGCTGTTTCATCCCTCCCTGTGGGTTTTTCCACTGGAATGCCTAT	37	8	73600575	TGTTCTCTGAGTTTGCATGCATTGCTGTAGCCCCCAGGACCTATTCAACG	8	73763129	R					KCNB2	NM_004770	Body					TRUE
cg21997510	17612458	CACTAACRTACAAATTACTATAAAACTTAAAATAAAATCACATAACTATC			II			AGAAGTCCTGGAATCTCCTCCCTGGGCAGTAGCTCGAGCTACACCCATGAGAGGCCACCT[CG]ACAGTCATGTGATCTCACTTTAAGCCTCACAGTAACCTGCACGCCAGTGAGCATCGTGTT	37	8	10381792	ACTGGCGTGCAGGTTACTGTGAGGCTTAAAGTGAGATCACATGACTGTCG	8	10419202	F					T-SP1	NM_198464	TSS1500
cg22861744	52722507	TCTAATTAAAAATAACCCCAACCATAACCTACTCCAAACRAACCTAATCC			II			GCACCACAGCATCTGGTTAAGAGTGGCCCCAGCCATGACCTGCTCCAGGCGGACCTGGTC[CG]CAATACGCCGAGGGATGGCGCGTTTCTCCACCGCTCTCCGGAGCAGGGTTTCTAGCCGTA	37	8	26365402	CGGACCAGGTCCGCCTGGAGCAGGTCATGGCTGGGGCCACTCTTAACCAG	8	26421319	R					PNMA2	NM_007257	Body
cg26241863	31790485	ACAACCTTAAACRTCCCAACTAAAACCTAAAAAACTAACRAAACAACCTC			II			TGGCATCAGCAGCAGCCTTGGGCGTCCCAGCTAAGACCTGGAGAGCTGACGGAGCAGCCT[CG]TGCTGCAAACAAGCAGGACCCTCCACCCATCAGAAAGAGCCCAGACCTCACCAGCACGCA	37	8	145849419	CGAGGCTGCTCCGTCAGCTCTCCAGGTCTTAGCTGGGACGCCCAAGGCTG	8	145820227	R								chr8:145849885-145851998	N_Shore				8:145820227-145820432	8:145849214-145849431	Unclassified_Cell_type_specific
cg04927695	41673411	CTAAAACCTAAAAAAAATAACCTATAAATTTAAACACCAAATACACCCCC			II			TGGTGGGGAAGCTGAGGCCTGGGGGGAGTAGCCTGTGAGTTTGGACACCAGGTGCACCCC[CG]CCCCCTCCCAGGCCCCACCAAGGCAGGCAGCCCCCATGCCCATCTGGCCTGACCAGCCCC	37	9	138677436	TGAGGCCTGGGGGGAGTAGCCTGTGAGTTTGGACACCAGGTGCACCCCCG	9	137817257	R					KCNT1	NM_020822	Body	chr9:138678108-138678467	N_Shore
cg08763846	16723474	AACACATTTAAAAACTTAACTATAAAACCCCCTAACTCTACTACTCCTCC			II			CTGGTCAGCCTGGGCCACTGAGGCAGGGACATGTGCTACCAAGGTGAAGGTGGACTGGGC[CG]GAGGAGCAGCAGAGTCAGGGGGCCCCATAGTCAAGTTCCCAAATGTGTTCGTTACACTGG	37	9	138984533	ACACATTTGGGAACTTGACTATGGGGCCCCCTGACTCTGCTGCTCCTCCG	9	138124354	F					NACC2	NM_144653	5'UTR	chr9:138985837-138987846	N_Shore					9:138984147-138985196	Promoter_Associated
cg13531387	40647344	AAACTAAAAACTAAAACCCCAAACAAACTAAAAAATATAACACAAAACTC			II			TGGTCCTCTCTTTACGAACAAAGAAACAGGTTAAGCACTTTCCGGAAGGCTGGTGACCCA[CG]AGCCCTGTGTCACACTTCTCAGTCTGCCTGGGGCCCTAGCTCTCAGCCTGGACACTTGGC	37	9	136078657	CGAGCCCTGTGTCACACTTCTCAGTCTGCCTGGGGCCCTAGCTCTCAGCC	9	135068478	F								chr9:136075388-136075701	S_Shelf
cg13605781	29725317	ATATATACTTATCAACACRAACCAATATAAAAATTCTCRTAACTCAACAC			II			TGTGTGTGTGAGTGTGTGCTTGTCAACACGAGCCAGTGTGGGGGTTCTCGTGACTCAACA[CG]TGAAGATAAATGTGTGAATGTGTATGGATGAGTGTGTGTCGGTGCTTGTGTGTACTTGTC	37	9	110394728	CGTGTTGAGTCACGAGAACCCCCACACTGGCTCGTGTTGACAAGCACACA	9	109434549	R												TRUE
cg14161107	44760344	CCCTACTTCAAAACAAACAAAAACRTAAACAATAACAATACACCAAAATC			II			TTCAGGCATTGCCCTGCTTCAAAGCAGACAGAAACGTAAACAGTGGCAGTACACCAGGAT[CG]GGTTTCTTTGCTTTAGCTACCAAGAGTCAGGAAAGAGAAACCAGGTATTTATTTAGGTTT	37	9	113476867	CCTGCTTCAAAGCAGACAGAAACGTAAACAGTGGCAGTACACCAGGATCG	9	112516688	R		rs12344208			MUSK;MUSK;MUSK	NM_001166281;NM_001166280;NM_005592	Body;Body;Body					TRUE
cg14282304	72611465	TCTATAAATATAAAAACATCTTCCTTCAAAATAATCATCTCAATATCCTC			II			GCTTCCAGGGGTCTGTGAGTATAAAAGCATCTTCCTTCAGGATAGTCATCTCAGTGTCCT[CG]TGTCTTCCCATACCTGATTAAAACAAGTCCCGGACACATTTTAAAGCACTGCATTCATGT	37	9	98793317	CGAGGACACTGAGATGACTATCCTGAAGGAAGATGCTTTTATACTCACAG	9	97833138	R								chr9:98789666-98790305	S_Shelf
cg14400672	57602419	ACTTTCACACTAATTTAACATCCCCCACRTACAAAATACTAAAATAAACC			II			AACAAAGGGTGACTTTCACACTAGTTTAGCATCCCCCACGTGCAGAGTGCTGAGATGGGC[CG]ACTGGAGAGAGGAGACTACAACTCTTAACCCTCCTGGCCTCAGGTTCTGCCTGTTCTGTG	37	9	21393116	CGGCCCATCTCAGCACTCTGCACGTGGGGGATGCTAAACTAGTGTGAAAG	9	21383116	R								chr9:21396071-21396364	N_Shelf
cg14431734	62641452	AAAAAATAAAAACAACTACCCCTAAAAATAAACTACTCTAAACCRAACCC			II			CTGAGCATTCCTCAATGCAGCCACCACGTCTGATTCACCTCAGTCCCCTACGCCTGACGT[CG]GGCCCGGCCCAGAGCAGTCCACCCCCAGGGGTAGTTGCTTCCACCTCCCTTAGTAGCTGG	37	9	125874949	CGGGCCCGGCCCAGAGCAGTCCACCCCCAGGGGTAGTTGCTTCCACCTCC	9	124914770	F					MIR600;C9orf45	NR_030331;NR_026677	TSS1500;Body						9:124914420-124914777	9:125874842-125875134	Unclassified_Cell_type_specific
cg14462686	51636448	ATTAAAATATACTATACTTTAACTCAAACTCCRCCTCACAAAAACAACCC			II			CCCAAGAGAAAGTTAGGGTGTGCTATGCTTTGGCTCAAACTCCGCCTCACAGAAACAACC[CG]ACTATGCCTAAGGGGGAGGGAATGGTAAGGTGGAGCTAAGCAGAGGTAAAGATAAGAAAA	37	9	4226519	CGGGTTGTTTCTGTGAGGCGGAGTTTGAGCCAAAGCATAGCACACCCTAA	9	4216519	R					GLIS3	NM_001042413	Body					TRUE
cg07418124	37791340	TATAAAATACAACCTCAAAAAAATAATACTAAAAATCCCCCACCTAAACC			II			TCGTTCTGGAGGTGATGGGACGACACTGTGGGTACGTACCTGCGGTGGGTCCGGTGGACG[CG]GTTCAGGTGGGGGACCCTCAGCATCATCTCCCTGAGGCTGCACCCCACATCCTGAATGCT	37	10	3147381	GTGGGGTGCAGCCTCAGGGAGATGATGCTGAGGGTCCCCCACCTGAACCG	10	3137381	F					PFKP	NM_002627	Body	chr10:3148406-3148625	N_Shore				10:3137281-3137727
cg09469430	10612430	AAAAATAAACTCTCRATACTACCRAATACTAAAATACCACRTCTTTATCC			II			AGGATGCTGCGGGGGATGAGCTCTCGGTGCTGCCGGATGCTGAAGTGCCACGTCTTTATC[CG]CATCATGTCGTCAAACATGAACTCCAGGTACAACCGGCCCTCCACACACACCTGGGGACA	37	10	103869748	GGGATGAGCTCTCGGTGCTGCCGGATGCTGAAGTGCCACGTCTTTATCCG	10	103859738	R					LDB1;LDB1	NM_003893;NM_001113407	Body;Body
cg09614580	51686505	TAAAAACTAAAAACATTATTACTAATTCTCACTCACCRAAACAACCTACC			II			CGAGGGCAGTCCTGGTGCCGACCCGGAGGTGGTGGCCTGCACCTGGGGCCTGTGCATCTG[CG]GCAGGCTGCCCCGGTGAGTGAGAATCAGCAACAATGCCCTCAGTCCCCAGCTCTGCCAGC	37	10	5682262	CGGCAGGCTGCCCCGGTGAGTGAGAATCAGCAACAATGCCCTCAGTCCCC	10	5722268	F	rs41290337				ASB13;ASB13	NR_024581;NM_024701	Body;3'UTR	chr10:5683648-5683878	N_Shore
cg10191248	65616371	AAAAATATCTTTTTCRACTCTCACTCCCTCRTTCATTTCACTTATCATCC			II			AGGGCCAGTGCCTGGTCTGTCCCGACTCCCTCTGTGTCCCCAGCTGCCAGCAACGTGCAG[CG]GATGACAAGTGAAATGAACGAGGGAGTGAGAGCCGAAAAAGACACCTTCCAGGAATCGTG	37	10	134441085	AAGGTGTCTTTTTCGGCTCTCACTCCCTCGTTCATTTCACTTGTCATCCG	10	134291075	F					INPP5A	NM_005539	Body						10:134290827-134291446	10:134440944-134441112	Unclassified_Cell_type_specific
cg10616411	27768418	AAATATAACATTATAACCAACAACTTTTATATTAACCATCCACTCAAACC			II			AAGCAGATGAGAGGTGTGGCATTATGGCCAACAACTTTTATATTAGCCATCCACTCAAGC[CG]TTTCCCAGCATACATATGCAGCTTAATCACAGCTATACATCTCTACAATGTGAAATTCGA	37	10	118430927	CGGCTTGAGTGGATGGCTAATATAAAAGTTGTTGGCCATAATGCCACACC	10	118420917	R					C10orf82;HSPA12A	NM_144661;NM_025015	TSS1500;3'UTR	chr10:118429430-118429853	S_Shore			TRUE
cg11760395	10718447	TCATAATTCATTAACAAAATTTTAACATAAAAAATTCCCATAACRAATAC			II			GAAAGCTGATTCATCATTAGGACGAGGTTCAAGGGAGAAGTCAGTGGCTGCCCACACTGG[CG]CATCCGTCATGGGAACTTTCTATGTCAAAACCCTGCCAATGAATCATGAACATTTTAGTT	37	10	33701708	CATGATTCATTGGCAGGGTTTTGACATAGAAAGTTCCCATGACGGATGCG	10	33741714	F												TRUE
cg11815199	48777414	CRTATACACCTATACTCTAAAACCTAAATACCCCTAAAAAAACAAACACC			II			GCTGACAGTTCTCCCAGCAGCAGGATCTGTGGGAGCGGGACTCCAGTGCACTCGGGTCCT[CG]GTGTCTGTCCTTCCAGGGGTATCCAGGTCTCAGAGCACAGGTGCACACGGGTACAGTGGC	37	10	3280741	CGGTGTCTGTCCTTCCAGGGGTATCCAGGTCTCAGAGCACAGGTGCACAC	10	3270741	F													10:3270415-3271239
cg12404858	71685373	CTAAAAAAAACRACTACCTCTATACATAAACRACTAAAACCAAAACCCAC			II			GGCACTTCCGTCTGATGGAAAAGGTAAACTAAAACAGCAGAGAGCTGGTGAGAAGGGGGC[CG]TGGGTCCTGGCTCCAGCCGCCCATGCACAGAGGCAGCCGCTTCCCCCAGGTCTTGCCCGG	37	10	133558466	TGGGGGAAGCGGCTGCCTCTGTGCATGGGCGGCTGGAGCCAGGACCCACG	10	133408456	F	rs9419585	rs74163327										TRUE	10:133408379-133408516
cg12488096	46749339	CCTACTTTTAAACCATCTCCTCCCTTAAAACATACAAATCAACAACAACC			II			GGTCATTCCCACTCAGATCATTTTGGAGGGAAGAATTAAAGCATCCAAGTAGCTAAATCC[CG]GCTGCTGCTGATTTGTATGCTCCAAGGGAGGAGATGGCTTAAAAGCAGGAGTGTCAAAGG	37	10	71927914	CGGCTGCTGCTGATTTGTATGCTCCAAGGGAGGAGATGGCTTAAAAGCAG	10	71597920	F					SAR1A;SAR1A	NM_020150;NM_001142648	5'UTR;5'UTR	chr10:71930007-71930587	N_Shelf
cg12769792	22636406	TAATCATATCATAATCCAACTCAAACCTAAACATAACCTCAACCCAAACC			II			GCTTGCGTTCCTAGTCATGTCATAATCCAGCTCAGACCTGGACATGACCTCAGCCCAGGC[CG]TGCCCGGTCCCCCTACTCCGTGGTTCCCCCGTGGGACTCGCATTCCTTCATTTTTATCCC	37	10	134983383	CGGCCTGGGCTGAGGTCATGTCCAGGTCTGAGCTGGATTATGACATGACT	10	134833373	R					KNDC1	NM_152643	Body	chr10:134980302-134981059	S_Shelf				10:134833318-134833444
cg13889750	38635445	ATAACCTAAAAATACACTACATAACTACRACAAATTTCAAACCCAAACAC			II			GAGGTGACAGAATGGCCTGAAAGTGCACTGCATGACTGCGACAGATTTCAAACCCAGGCA[CG]TTGCTCTGGCCTTATGTTCTTTCTGTGACTCTAACTGCCTCTCTTGCAGCAACAGAACTG	37	10	101876889	CGTGCCTGGGTTTGAAATCTGTCGCAGTCATGCAGTGCACTTTCAGGCCA	10	101866879	R								chr10:101874821-101875139	S_Shore
cg15022173	34780371	ACCCTAACTTTACACTAACACAACAACTAAACTAAACACAACAAAACTAC			II			GCCCTGGGCGAGCACTGAGGGAAGCTTGGCCTCAGACATAGCCAGCTGCCCTCTGGACCT[CG]CAGCCCTGCTGTGCCCAGCTCAGCTGCTGTGTCAGTGCAAAGCCAGGGTGACATCAGCTG	37	10	102101046	CGCAGCCCTGCTGTGCCCAGCTCAGCTGCTGTGTCAGTGCAAAGCCAGGG	10	102091036	F												TRUE
cg15101985	10608325	AAAAAACAACTAAACCTCAACAAAAATACAAACCAACCCCAAAAATACCC			II			GAACCTCAGCCCTGAGGTCCTGTAATGAGGGGCAGTGAGGACCCCCTTCAGAAAGCAGAG[CG]GGCATTCCTGGGGCTGGCCTGCATTCTTGCTGAGGTCCAGCTGCCCCCTAATTCTTATAG	37	10	85961501	CGGGCATTCCTGGGGCTGGCCTGCATTCTTGCTGAGGTCCAGCTGCCCCC	10	85951481	F					PCDH21	NM_033100	Body
cg15657270	60667441	TACCTAACCAACTTTTAAAATTTTTTTCATACAAACAAAATCTCACCATC			II			ACACACTACTGTGCCTGGCCAACTTTTAAAATTTTTTTCATACAGGCAGGGTCTCACCAT[CG]AGCCCAGGCTGGTCTTGAACTCCTGGGCTCAAGCAGTCCTCCCGCCTTGGCCTCCCAAAG	37	10	104734496	GCCTGGCCAACTTTTAAAATTTTTTTCATACAGGCAGGGTCTCACCATCG	10	104724486	R					CNNM2;CNNM2	NM_199076;NM_017649	Body;Body					TRUE
cg16803967	23801406	CCAAATACTTCTCRACAAACRAAAAAATCATATATCTAAATAAATCCACC			II			GGGTGCTGCATCCAGATGCTTCTCGACAGACGAGGGAGTCATATGTCTGGATAAATCCAC[CG]TATGTTCAAGCGATCAAAAATGCATAAAGTACCCCGGTAATCCCATCATAAGGTCGAAGC	37	10	133872299	CGGTGGATTTATCCAGACATATGACTCCCTCGTCTGTCGAGAAGCATCTG	10	133722289	R													10:133722192-133722290
cg18037376	73694333	ACACACRAACTAAAAACTATTTACACCTACCTAAATACCATATAACCAAC			II			GTACACGCTGGCCACGTGGTATCCAGGCAGTTGAAAGTATGTTCCCAGCTCGTGTGTACA[CG]CTGGTCACATGGTATCCAGGCAGGTGCAAATAGTTCCCAGCTCGTGTGTACACGCTGGCC	37	10	134004552	CGCTGGTCACATGGTATCCAGGCAGGTGCAAATAGTTCCCAGCTCGTGTG	10	133854542	F	rs80162105				DPYSL4	NM_006426	Body	chr10:133998912-134001500	S_Shelf				10:133854273-133856029
cg18189112	24641487	AAACCACCACTTATAAAATTTTAATTTAATATTAACAAATACCCACAACC			II			ACTAATTTAAGAAACCACCACTTGTGAAGTTTTGATTTAGTGTTAACAAATACCCACAAC[CG]TCTGAAAACTTTTAAAATACACCTTCTACTAACTACATATTTGCATGAGGTTAGGTCATC	37	10	48905601	CGGTTGTGGGTATTTGTTAACACTAAATCAAAACTTCACAAGTGGTGGTT	10	48525607	R								chr10:48901419-48901642	S_Shelf
cg18948794	21747312	TAATACRAAAACAAAATTATAAAACCRCCTACTTCCTCCTCACTAAACCC			II			TCCCTCCTTGGTGGTACGGAGACAGGATTGTGGGGCCGCCTGCTTCCTCCTCACTGGACC[CG]CCCTCTTGCCTAAGCAGGACCCCGAGGGGTGCGGTGGGGGCTGGATCCCCGTCCTTCTTG	37	10	134894048	GGTACGGAGACAGGATTGTGGGGCCGCCTGCTTCCTCCTCACTGGACCCG	10	134744038	R								chr10:134891010-134893402	S_Shore				10:134743924-134744039			TRUE
cg22623319	57780417	AAACCCTTCTTACATCTATTTTTAACTAAATTTAACATATAAATATAAAC			II			AAAGTGAAGTCAGGCCCTTCTTGCATCTATTTTTAACTAAGTTTAGCATATGAATGTGAA[CG]TGAAGTCTTTCTTTAGATCCCCCTAACTCAATTACTGACGTATGCCAAGCATCCCGCCTG	37	10	112427911	GGCCCTTCTTGCATCTATTTTTAACTAAGTTTAGCATATGAATGTGAACG	10	112417901	R					RBM20	NM_001134363	Body	chr10:112431835-112432426	N_Shelf			TRUE
cg22757362	14689382	ACRACAATCACAATAACATTTAAAAAATACCAAAAACTAAATCCCAACCC			II			AGGGGTGGCTGGCGGCAGTCACAGTGACATTTGGGAAATGCCAGGGGCTGGGTCCCAGCC[CG]GAAGGCGGGTGTGGGCGGTGACAGGGGTGGGGGCTGGGTTATTCCCCGAGGCTGAGACCA	37	10	43721445	CGGGCTGGGACCCAGCCCCTGGCATTTCCCAAATGTCACTGTGACTGCCG	10	43041451	R					RASGEF1A	NM_145313	5'UTR	chr10:43724528-43725613	N_Shelf
cg23119049	67808372	AACAACCCRCAAATATCRATCATCATCAAACTTAACAACTACTAACTCAC			II			ATGTGTGTGGGGTCTGCCTCTGCTCCAGCTAACATCCCCTCTCCCCAGGGAACTTTTGGG[CG]TGAGCCAGCAGCTGTCAAGCCTGATGATGACCGATACCTGCGGGCTGCCATCCAGGAGTA	37	10	73572537	GCAGCCCGCAGGTATCGGTCATCATCAGGCTTGACAGCTGCTGGCTCACG	10	73242543	F					CDH23	NM_022124	Body					TRUE		10:73571183-73572582	Unclassified
cg23183348	65760399	AAAACAACAAAAACCCCCATACTATCCACCCACATAAACRTAACCATAAC			II			TCTAGGTCCCTGTTTCTAGACGTCGGCCTGGCCGTCGCATGGGGAAGGGAGTGGGTTTCG[CG]TCATGGCCACGTCCATGTGGGTGGACAGCATGGGGGTCTCTGCTGCTCCCCACCATGGCC	37	10	135009513	GAGCAGCAGAGACCCCCATGCTGTCCACCCACATGGACGTGGCCATGACG	10	134859503	F					KNDC1	NM_152643	Body						10:134859177-134859515
cg24985151	34803326	TCACTTTAAAAAATATTCCACACAATACCTAATCTATACTCTTAAATAAC			II			TCCTGCATTAGTCTTCTTTGATCTGGAACCGTTCCTTGGCTTTTATATTTATTGAAATGA[CG]TTATTTAAGAGTACAGACCAGGTATTGTGTGGAATATCCTTTAAAGTGAGTTTGTCTGAT	37	10	45721068	CACTTTAAAGGATATTCCACACAATACCTGGTCTGTACTCTTAAATAACG	10	45041074	F								chr10:45719712-45720203	S_Shore
cg01404122	69706453	AAAACTAATTCTTCTCCCAATTCTACATAAATACTAAATCTTACAACCCC			II			ACATTCATCACAGGCCTGGGAGGGAATGACCCAAGCCTGGAAGGACCAACTGAAAGGGTT[CG]GGGCTGCAAGACCCAGTACCTATGCAGAACTGGGAGAAGAACCAGTTCCCACCAGCCAGA	37	11	2243685	CGGGGCTGCAAGACCCAGTACCTATGCAGAACTGGGAGAAGAACCAGTTC	11	2200261	F											RDMR
cg01409873	69794462	TTTACCAAACTTAATCTTTACTTCCAAAAATACCCRCTATCTATAACCCC			II			CCTCGCTACAGCGGGGCTGGGCGTTCACGGCGGCCGGGGGCAGGGCCACGGGCACCATGC[CG]GGGCTACAGACAGCGGGCATCCCTGGAAGCAAAGATCAAGTTTGGTAAAAACGTCGGAAA	37	11	1298460	CGGGGCTACAGACAGCGGGCATCCCTGGAAGCAAAGATCAAGTTTGGTAA	11	1255036	F					TOLLIP	NM_019009	Body	chr11:1298009-1298476	Island				11:1254496-1255255
cg02939292	39749505	CCACTAAACAAAACCTCCCRTAACATCAACAAAACCAAAAACTCCTATAC			II			CATGAGGCCTTGTGGCCTGCCTTTGCTCCACCCAAAGTTCGTGCCCAGCCAAGGGGAGAA[CG]TACAGGAGCTTCTGGCCCTGTTGATGCCACGGGAGGCTCTGCTCAGTGGCCTGGCCTCCA	37	11	60716250	CACTGAGCAGAGCCTCCCGTGGCATCAACAGGGCCAGAAGCTCCTGTACG	11	60472826	F					SLC15A3;SLC15A3	NR_027391;NM_016582	Body;Body	chr11:60718428-60718888	N_Shelf			TRUE
cg03818576	41628506	CTATTCCTCTCTAAAACCTTCTATCAAAATCATAAACTCATATAACTTTC			II			TTCTCTAGGCCTCAGTTTCCTTTTTTTATTGACTTGAGATCTCTGGAGAGTCTTCTGGCT[CG]AAAGTTATATGAGTCTATGATTCTGATAGAAGGCCCCAGAGAGGAATAGCGAAGGGGGAA	37	11	40312660	TATTCCTCTCTGGGGCCTTCTATCAGAATCATAGACTCATATAACTTTCG	11	40269236	F					LRRC4C	NM_020929	5'UTR					TRUE
cg04096519	72670499	RAATTAACCACRCTATTAAAAAAAACCAAACTAATAACRAAAAACAACCC			II			CGTAGAGCACCGGGTTGGCCACGCTGTTGAAGAAGGCCAGGCTGGTGACGAAGGGCAGCC[CG]CGCCACACGAGCGGCCGCAGCCCCGGGTTTGCGTGCGCCCGCGCCTCCAGCAGGCTGAAC	37	11	60620343	GGTTGGCCACGCTGTTGAAGAAGGCCAGGCTGGTGACGAAGGGCAGCCCG	11	60376919	R					GPR44	NM_004778	Body	chr11:60619924-60621111	Island				11:60376446-60377687
cg06506768	37697357	CACTCAATCACCTACAAACCTTTACACAAACTATTCCCTCTACTCAAAAC			II			AATGCACTGTACACTCAATCACCTGCAGGCCTTTGCACAGGCTATTCCCTCTGCTCAGAA[CG]CCTTTCATGCTCATGTCCTCACTCTGCCTGCCTAACTTCTGCTCCTTTGGGGATCTGGCT	37	11	16848251	ACTCAATCACCTGCAGGCCTTTGCACAGGCTATTCCCTCTGCTCAGAACG	11	16804827	R					PLEKHA7	NM_175058	Body
cg08128650	56752439	CTCCTAACCCCCAATTTATCCTAATTTCCCATCCTTAAAACTCCAAATTC			II			TGAGCCCTTCCCTCCTGACCCCCAGTTTATCCTGGTTTCCCATCCTTGGGGCTCCAGATT[CG]TTTTATTTCCATTCATCCTGCTGGTTACTTAACTAAAGACTGCAGCTGATCAGTCAGCCC	37	11	65426704	CGAATCTGGAGCCCCAAGGATGGGAAACCAGGATAAACTGGGGGTCAGGA	11	65183280	R					RELA;RELA	NM_021975;NM_001145138	Body;Body	chr11:65430142-65431079	N_Shelf
cg09035529	41693490	CCATCCCCACACAAACAAACTAACRAACAACAAAAAAACTACTATAAACC			II			CAGGGCTTCTGCCATCCCCACACAGGCAGGCTGGCGGGCAGCAGGAAGGCTGCTGTGGAC[CG]GGCCCGGCGCTCTCTCCGTCATAGCAAGAGGCATCTCGGGACCCTAGGAGCCGCGGTGGG	37	11	64335804	CATCCCCACACAGGCAGGCTGGCGGGCAGCAGGAAGGCTGCTGTGGACCG	11	64092380	R					SLC22A11	NM_018484	Body	chr11:64335489-64335965	Island				11:64092066-64092436
cg13285077	25687348	AAAAACTCTACTAACACAACATAACCTCCCTCTATAAATCCRACAAAACC			II			TTGGAAATGGCAGTGATTGATTGGCAGGTGCTGGGTGGAGAGCAGAGGGGAGGCTGGGCT[CG]GTTCTGTCGGATCTACAGAGGGAGGCCATGCTGTGCCAGCAGAGCCCCCTTCAAGGAGGC	37	11	134651819	CGGTTCTGTCGGATCTACAGAGGGAGGCCATGCTGTGCCAGCAGAGCCCC	11	134157029	F											DMR
cg13608094	71689463	TTATTTATTCTCTCRAAATAAAATCTCRAATAAACCRCCACACCCCTAAC			II			CAAGGCCGAAGTTGTTTATTCTCTCGGGATGAAGTCTCGGATGGGCCGCCACACCCCTGG[CG]GCCCGTGGGGGCCCCTCTCCCTTTGTGCCTGGGTCGGCTCCCATTCAGCTCCCCCGACCC	37	11	69461236	TGTTTATTCTCTCGGGATGAAGTCTCGGATGGGCCGCCACACCCCTGGCG	11	69170417	R				TRUE	CCND1	NM_053056	Body	chr11:69461060-69461378	Island				11:69170132-69170559
cg14765337	18708510	ATAACRACCAAAACTATATATAAAACCTAACCRATAAACACRAAAAAACC			II			GAGGAACGCTGGTGGCGACCAGGGCTGTGTGTGGGGCCTGGCCGGTAGGCACGGAGAGGC[CG]CACGCTGGGACGCTGCCGGAGTCAGTTTTATTAGGGAAGAGGGGCTCCCTGCCCCACCCC	37	11	45931715	CGGCCTCTCCGTGCCTACCGGCCAGGCCCCACACACAGCCCTGGTCGCCA	11	45888291	R					PEX16;PEX16	NM_004813;NM_057174	3'UTR;Body							11:45931509-45931731	Gene_Associated_Cell_type_specific
cg15727249	55687368	CRATAATATAAAACTACTTCAACCAACTAAACAACAATACCAAAAAAACC			II			CACACTGTAGTCCCTCTTACTTGAGTTGCTGGGTGAGTTCAGATTTCTGGAGATGTTCCA[CG]GCCTCCTTGGCATTGTTGCTCAGCTGGCTGAAGTAGTCCCACATCACCGTGGCCACCTGG	37	11	116693415	CGGCCTCCTTGGCATTGTTGCTCAGCTGGCTGAAGTAGTCCCACATCACC	11	116198625	F	rs5092			TRUE	APOA4	NM_000482	Body	chr11:116691949-116692360	S_Shore
cg16792062	64697482	TAAACAATCTCTAAAATAAAAATACTTTTAACAACCCTAACTCATAATCC			II			AAGTCTGGTTTTAGGCAATCTCTAAAATAAGGATACTTTTAGCAGCCCTGACTCATGGTC[CG]TGGTGCAGGAATAAAAGGGCAGAAGTGTTCATACATTTCTCATTTAGGGAAAATGTAAAC	37	11	128458153	CGGACCATGAGTCAGGGCTGCTAAAAGTATCCTTATTTTAGAGATTGCCT	11	127963363	R					ETS1	NM_001143820	TSS1500					TRUE
cg18890215	67684445	ATACTAAAATATAATAAAAAATTACCATCAACCAAACACCTAATTTCCAC			II			CCTGCTTGCTGATGCTGAAGTGTGGTGGAGGGTTGCCATCAGCCAAACACCTGATTTCCA[CG]CGGTCCCCTTCCTTCAGCATTCCCACGGGCTCCACTTCCAGCCACACTTTTTCTGTCGGG	37	11	119183296	TGCTGAAGTGTGGTGGAGGGTTGCCATCAGCCAAACACCTGATTTCCACG	11	118688506	R					MCAM	NM_006500	Body	chr11:119181396-119181670	S_Shore
cg19013178	38665460	CTCACRTCCTATATTTACTTAACTACAACAAAAAACAAACTACTACAACC			II			TTTGTGGTCATCTCACGTCCTGTGTTTGCTTGGCTGCAGCAAGAAGCAGGCTGCTGCAAC[CG]CTGGTCATTTGTATCTGTTTGGAAGATTCAACAGGAGAGGGAGGCTTGCAGAAAACAAGC	37	11	110935112	TCACGTCCTGTGTTTGCTTGGCTGCAGCAAGAAGCAGGCTGCTGCAACCG	11	110440322	R												TRUE
cg19397037	65768457	CACCAACATCAAAAAAAACAATCAAAACTATCCAACAAAAAATTCRACTC			II			TCAAGGCCCATCACCAACATCAGGAAAAACAATCAGGGCTGTCCAACAAAGGATTCGACT[CG]CCTTCTCTGGAAGCATTCAGGCGGATATGGGGGTTGGCCGCCTGTTGAGGAGGCTTTAGA	37	11	85430634	ACCAACATCAGGAAAAACAATCAGGGCTGTCCAACAAAGGATTCGACTCG	11	85108282	R					SYTL2;SYTL2;SYTL2;SYTL2;SYTL2;SYTL2;SYTL2;SYTL2	NM_001162951;NM_001162952;NM_206929;NM_032943;NM_206930;NM_206928;NM_206927;NM_001162953	Body;TSS1500;TSS1500;Body;TSS1500;Body;Body;Body					TRUE
cg19988316	73674390	AAAATTCTAAACAAAATCCRTTTAAAATCTACAAAACCAAATACTAAACC			II			AATTCTCTGGGGAGGTTCTAGACAAGATCCGTTTGAGATCTGCAAAACCAAATGCTAAGC[CG]TATGTGTGTCTGTACCTATGTATGGGTGTCTGTCTTGCTTTTGCTGTTCATTGAGCCTTC	37	11	36052181	CGGCTTAGCATTTGGTTTTGCAGATCTCAAACGGATCTTGTCTAGAACCT	11	36008757	R					LDLRAD3	NM_174902	Body					TRUE
cg20803916	69729372	CAAAATCTACAAAATAAACCAAAAAACTCTAAATCCAAAAAAAAATCAAC			II			ACTGGCAAATCCAAAGTCTGCAAGGTAGGCCAAGAGGCTCTGGATCCAAGAAGGAGTCAA[CG]TTATAGCTCACGCCTGAGGTTTGCCTGCTGGTAATATTCCCTCTTCTCGGGGAGAAGTCA	37	11	5709456	CGTTGACTCCTTCTTGGATCCAGAGCCTCTTGGCCTACCTTGCAGACTTT	11	5666032	R					TRIM22	NM_006074	TSS1500
cg21424090	41649507	AACCTAACTCACCTACCTATCCAAATCRACCAAAATCCAACCTTTAAAAC			II			TTGCTGGGCACAGCCTGGCTCACCTGCCTGTCCAAGTCGGCCAAAGTCCAGCCTTTGAGG[CG]TGGCCACCTGAGGGGACGTGTGCTTGGTCTGTGTGTGGCCCGCTTGCCCCTCCTGCTCTC	37	11	118550443	CGCCTCAAAGGCTGGACTTTGGCCGACTTGGACAGGCAGGTGAGCCAGGC	11	118055653	R					TREH	NM_007180	TSS200
cg21886186	67685410	AATCCCTTCTAACCCTTTCCTTCTACCAAATAAACCATAAAACCCAAAAC			II			TTTGGATCCATTCTCTTTGATCACCCTGAGGCAAGGAGCTGACCCTCTCCTGTACCCCCA[CG]CTCTGGGCCCCATGGCCCATCTGGCAGAAGGAAAGGGCTAGAAGGGACTTGTTCCTTGGT	37	11	120106598	CGCTCTGGGCCCCATGGCCCATCTGGCAGAAGGAAAGGGCTAGAAGGGAC	11	119611808	F								chr11:120110497-120110719	N_Shelf			TRUE		11:120104998-120106648	Unclassified
cg22195512	54650491	TAAATACACACTCACAAACRTACCCCATACAAAAATAAAATACTCCACAC			II			CACGTGCGTGTGCCGGGTCGTGTGTTTCCGTGTGTGTGTGCACAAGCACAGACACGTGCA[CG]TGTGGAGCATCCCATCTCTGCATGGGGCACGCTTGTGAGTGTGCACCCACATACACAGAG	37	11	2602980	GGGTGCACACTCACAAGCGTGCCCCATGCAGAGATGGGATGCTCCACACG	11	2559556	F	rs2283174				KCNQ1;KCNQ1	NM_000218;NM_181798	Body;Body	chr11:2603220-2603469	N_Shore				11:2559494-2559620
cg23137936	21696315	TTAATTCAAACAATTACCTAATCATCAAATACCCTTTAAACATAAACTAC			II			AGTCAGAAATAGGGAGGGTAATTAATTAGACTGTAAGCTCCAGGAAAGCAGGGGCGGCAG[CG]CAGCCTATGCTCAAAGGGCATTTGATGATTAGGTAACTGCTTGAATCAACAACTTCTGAC	37	11	45724816	TGATTCAAGCAGTTACCTAATCATCAAATGCCCTTTGAGCATAGGCTGCG	11	45681392	F
cg23614000	17601322	ATAAAAACCCTCCATTCACTCRTAAAATAACCTATATTACAAATACAACC			II			CCAACAGTAGGGAGGGGTTTCCCCAACTTCCCTCCAGGCTCCTGGCACGGGGCTGGCATC[CG]GTTGTACCTGCAACACAGGTTATCTTACGAGTGAATGGAGGGCCCCTACAGCCTCCCATT	37	11	47353259	TAGGGGCCCTCCATTCACTCGTAAGATAACCTGTGTTGCAGGTACAACCG	11	47309835	F					MYBPC3	NM_000256	3'UTR
cg26389053	34688466	AACTAAAATATAACCRCCATAACCAACCAATCTAACTAAAAATAAAACCC			II			TCTTCCCCTCGGGCTGGAGTGTGGCCGCCATGGCCAACCAGTCTGGCTGGAGGTGAGGCC[CG]GGCCCCAGCCCGGCTGGGGGCCCCGCAGCACCCGCAGCCCTGACCGCCCTCCCCTGCGTT	37	11	67815280	GCTGGAGTGTGGCCGCCATGGCCAACCAGTCTGGCTGGAGGTGAGGCCCG	11	67571856	R					TCIRG1;TCIRG1	NM_006053;NM_006019	Body;Body						11:67571714-67571949
cg01407875	64778355	AAAACATACCTAACAACCACTAAAATTTAAAAATACTAATAACCCAAACC			II			GGCTCTGTAAAAGAACATGCCTAGCAGCCACTGGGGTTTGAGAGTGCTAGTAACCCAGAC[CG]AGGAGGAGGGCATCTCTCCAGAGTCATTCAAAGAGAGTGGGTAAAGCTAATCGTTTTTGC	37	12	91817272	CGGTCTGGGTTACTAGCACTCTCAAACCCCAGTGGCTGCTAGGCATGTTC	12	90341403	R		rs73364190										TRUE
cg02060434	65772420	CCAAAAAACACACRAACAACCATAAAAATAAATAAATCCCACCCTTCCTC			II			TGTGGAGGAGGCATTGGCCTGCTTGTCCAGCCCTAGGAGGCTTCTGAAGGGGATGATGGA[CG]AGGAAGGGTGGGACTCACTCACCCTTATGGCTGCCCGTGTGCCTCCTGGCTCAGCAGCCA	37	12	52473014	CGAGGAAGGGTGGGACTCACTCACCCTTATGGCTGCCCGTGTGCCTCCTG	12	50759281	F	rs35953258							chr12:52473350-52474178	N_Shore			TRUE
cg02505216	47603388	CCCRAAAACRAACACRAAAACCAAAAACAAATCTCTTCTATAACCTAAAC			II			TGATGGGGGACCCCGAGGGCGAGCACGAGGACCAGAAGCAGATCTCTTCTGTGGCCTGAG[CG]CCCATCCCCACCCGGCCAGGTAGGAAGGGCGGGGAGAGCACACGGCATTGCTCAGCCACA	37	12	1943889	CCGAGGGCGAGCACGAGGACCAGAAGCAGATCTCTTCTGTGGCCTGAGCG	12	1814150	R					LRTM2;LRTM2;CACNA2D4;LRTM2	NM_001039029;NM_001163926;NM_172364;NM_001163925	3'UTR;3'UTR;Body;3'UTR						12:1813937-1814165
cg08245487	36612488	ATAATCTCCACCTTCCAATTAAAACATTAAAATAAATACTATTACCRAAC			II			TTGTTCCATGGGTGGTCTCCACCTTCCAGTTAGAACATTAGAATAAGTACTATTGCCGGG[CG]TGGTGGATCACGCCTGTAATCCCAGCACTTTGGGAGGCCTAGGTGGGCGGATCACAAGGT	37	12	13249133	CGCCCGGCAATAGTACTTATTCTAATGTTCTAACTGGAAGGTGGAGACCA	12	13140400	R				TRUE	GSG1;GSG1;GSG1;GSG1	NM_001080555;NM_153823;NM_001080554;NM_031289	Body;TSS1500;Body;TSS1500
cg09798033	49651348	CACTAAAAAACACTAAACCRACTAAACCATAAAATAAATACACRCCCAAC			II			GGCTTTTAATGGACTGCATTATGGAAGGCCGTGCGGGGCCAGTCGGTGGGGAGATAAGGC[CG]CTGGGCGTGCATCCATCTCATGGCTCAGTCGGCCCAGTGTCTCTCAGTGCTCACGTCTGC	37	12	111664754	ACTGAGAGACACTGGGCCGACTGAGCCATGAGATGGATGCACGCCCAGCG	12	110149137	F					CUX2	NM_015267	Body						12:110149106-110149169
cg11566267	42650306	CAAAAACAAAACTAAACCTACTCCCACRATATATAAAATTAAATAAACCC			II			ACAGTGCACGCCGTGGGCCGCCTGCCCTCCTCTCGTCTGCCTGGCAATCCCAGCTGTGGC[CG]GGTCCACTCAACCCTACACATCGTGGGAGCAGGTCCAGCCCTGCTCCTGCCCCAGCCCGG	37	12	132895346	AGGAGCAGGGCTGGACCTGCTCCCACGATGTGTAGGGTTGAGTGGACCCG	12	131405419	F					GALNT9	NM_001122636	Body	chr12:132896299-132896569	N_Shore				12:131405337-131405755	12:132895196-132895606	Unclassified_Cell_type_specific	TRUE
cg11755803	10654434	CACCACTCAATTTCTAAATACAAAAACCTCAAACCAACRAACCACAAAAC			II			GATACAGGATTATAGGATGATACACAGGCACGTCGGGCCCATGTCCGTGCCAGCATCACC[CG]CCCTGTGGTTCGCTGGTTTGAGGTCCTTGTACTTAGAAACTGAGTGGTGTTTCCATTCAG	37	12	129000542	CGCCCTGTGGTTCGCTGGTTTGAGGTCCTTGTACTTAGAAACTGAGTGGT	12	127566495	F		rs75106667			TMEM132C	NM_001136103	Body						12:127566480-127566585
cg14282126	59633372	AACRCTACAAATATCCAAAACAATAAATAATTAACTAATAAAACAAAAAC			II			TAGAAAAATATACAAAAGCAAAATTTTGCAAATCATGGGAGAAGGGAATTTCCAGGCGAC[CG]CTTCTGCTTTACCAGCCAATCATCTACTGTCTTGGATACTTGCAGCGTTATCTAGTCTTT	37	12	93859780	ACGCTGCAAGTATCCAAGACAGTAGATGATTGGCTGGTAAAGCAGAAGCG	12	92383911	F	rs76353160				MRPL42;MRPL42;MRPL42	NM_172178;NM_014050;NM_172177	TSS1500;TSS1500;TSS1500	chr12:93861204-93861539	N_Shore
cg15773148	57704349	CTCTCAATTAATTATAACAAAAAATCCAAACTAAAATTCTCTATTTACCC			II			GGTGTGGGTGGTGAGGATGGAGTTGTAGGGCTCAACTACAGCTGTGGAAACCTGGGGCGC[CG]GGTAAATAGAGAACTCCAGCTTGGACTTCTTGCCATAATCAACTGAGAGACGTTCCATGA	37	12	49579630	TCTCAGTTGATTATGGCAAGAAGTCCAAGCTGGAGTTCTCTATTTACCCG	12	47865897	F					TUBA1A	NM_006009	Body	chr12:49582096-49582881	N_Shelf
cg17527422	35789482	CAAAAATCCCTCAAATATCCCCTAAATCTAAACTACTACTAAACACCCCC			II			GATTGCTTTTCCACTCCCTGGGGCTTAGAGAACAAAGAGCCCGGTTCACAGGCAGAGACT[CG]GGGGTGCTCAGCAGCAGCCCAGATTTAGGGGACATTTGAGGGACTCTTGGGGCCGCAGCC	37	12	48579245	CGGGGGTGCTCAGCAGCAGCCCAGATTTAGGGGACATTTGAGGGACTCTT	12	46865512	F					C12orf68;C12orf68	NM_001013635;NM_001013635	3'UTR;1stExon	chr12:48577361-48578574	S_Shore					12:48579151-48580993	Unclassified_Cell_type_specific
cg19273074	34716455	ATAAACACTTAACTACTACTATACCATAAACCACCAACATCCCAAACATC			II			GTTTGTCCCAAAGGTGACACAGTGCTACATTTGTTCTTAGACAAGATTGCTGATGAAGGA[CG]ATGCTTGGGATGTTGGTGGCCCATGGCACAGCAGTAGCCAAGTGCCCACTGACTACTGGC	37	12	41832738	TGGGCACTTGGCTACTGCTGTGCCATGGGCCACCAACATCCCAAGCATCG	12	40119005	F	rs2125288				PDZRN4;PDZRN4	NM_001164595;NM_013377	Body;Body					TRUE
cg20596724	28608306	AAACAAACAACATTAATTCTATACCTTCCAAACCCCAAAAAAAACAAATC			II			TTATTAATGTAAAACAAACAACATTGGTTCTGTACCTTCCAAACCCCAAGAGAAACAAGT[CG]CAGGTCATCAGCTCTCTGGAATTCTTAGGTAAGTCTCCATCATGAGAGAGGATGAAAAGC	37	12	57328644	AACAAACAACATTGGTTCTGTACCTTCCAAACCCCAAGAGAAACAAGTCG	12	55614911	R					SDR9C7	NM_148897	TSS1500
cg21337717	17767355	ATAAAAACTATCTAAAACATAAAATCATATCAAAATCTAAAAACACTACC			II			GAGACCCTGTCTCAAATAAATAAATAAAGGCCAATGACATGAATGAGATATGGGAGCCAA[CG]GCAGTGTTTCCAGATCTTGACATGATTTTATGCTCTAGACAGCCTTTATAATACAAGAAT	37	12	117308650	CGGCAGTGTTTCCAGATCTTGACATGATTTTATGCTCTAGACAGCCTTTA	12	115793033	F			TRUE		HRK	NM_003806	3'UTR
cg22253541	73767476	CCTACTATACCAAAACTAATACTCTTTTTATTATATTATCTTACCTTTCC			II			GAGAGTGTTTTAATGTGGAGGAATGACCCTAATGATAGAAGTTTTAATAAGTCAAATGAG[CG]GAAAGGCAAGACAATATAACAAAAAGAGCACCAGTTTTGGCATAGCAGGCACTCAATAAA	37	12	65385603	CTGCTATGCCAAAACTGGTGCTCTTTTTGTTATATTGTCTTGCCTTTCCG	12	63671870	F												TRUE
cg22353792	10806420	AAATAAAATACTCACTACAACTCTAATATATATAACACACAACCCCCTCC			II			CGAATACTCAGAGGCCCGGAGTGAAACACAGTGCACTTTATTGGCGACAGACCGGAGGGG[CG]GAGGGGGCTGTGTGCTATATACATCAGAGCTGTAGTGAGCATCCCACCCAGGGAGGGGAC	37	12	53183508	GGTGGGATGCTCACTACAGCTCTGATGTATATAGCACACAGCCCCCTCCG	12	51469775	F					KRT3	NM_057088	3'UTR	chr12:53183713-53183931	N_Shore
cg24906157	67686402	TTTTAACATTTATTCTACCCTCTAAAAACCRTAAATACAAAAACTATATC			II			ATTTGTATAACTTTTAACATTTGTTCTACCCTCTGAAAACCGTGAGTGCAGAAGCTATGT[CG]CATTCACTATGTCTCTGTAGTGTTTATATGCAGTACTTTAGTTATTTTCCATAAATTTTT	37	12	27177936	TTTAACATTTGTTCTACCCTCTGAAAACCGTGAGTGCAGAAGCTATGTCG	12	27069203	R					MED21	NM_004264	Body	chr12:27175342-27175843	S_Shelf
cg25600933	72649481	ATAACAATATAAAACCTCTATCAACTCTTATTTTATCCTCRTTTAAATCC			II			GGACTGTCTCCTTGACCCAAAGGAAAATGCTAATTCAAAGCTGGCTTCCCCTGCCTGGCT[CG]GACTTAAACGAGGACAAAACAAGAGCTGACAGAGGCCCCACACTGCCATCACCACAAATG	37	12	118031023	CGGACTTAAACGAGGACAAAACAAGAGCTGACAGAGGCCCCACACTGCCA	12	116515406	F					KSR2	NM_173598	Body					TRUE
cg27165667	27617355	AAATATCTCCCRTAATTCCTAAACTTTATACRCAAACACTAAACTTAAAC			II			CCTTACTTCGAGGAGCCGTATCATCAAGTGCAAATTAATTTGTGCAAGGTAGCACACCTG[CG]TCTAAGCCCAGTGTCTGCGTATAAAGCCCAGGAATTACGGGAGACATTTTGAAGCCAAGT	37	12	131129133	AATGTCTCCCGTAATTCCTGGGCTTTATACGCAGACACTGGGCTTAGACG	12	129695086	F								chr12:131125848-131126059	S_Shelf				12:129695086-129695199
cg01250888	69661452	TATAAAACCCTACACTACRACAAAAAACAACTCAAAAAAACCTCCRTACC			II			GCATGCACGACTATGAGGCCCTGCACTACGACAAGGAGCAGCTCAAGGAGGCCTCCGTGC[CG]CTGGGCACTGTGGTGGTCCCAGGAGACAGTGACCTAGAGCTCTGCCGTGCCCACATTGAG	37	13	44544577	CGGCACGGAGGCCTCCTTGAGCTGCTCCTTGTCGTAGTGCAGGGCCTCAT	13	43442577	R								chr13:44544202-44544578	Island				13:43441569-43443480
cg02217184	21686437	CRAAACAAATATAAAAAAACATAAAACAAACRAACACCTACACCAACAAC			II			CATCAGGAAAGCGAAACAGATGTGGAAGGGCATAAAGCAGACGAGCACCTGCACCAGCAG[CG]TGATGATGATCCTTATGGACTTCTCCTTGACTTTGGGTTTCAGCTTAGACGTCCTGCCGT	37	13	99907419	CGCTGCTGGTGCAGGTGCTCGTCTGCTTTATGCCCTTCCACATCTGTTTC	13	98705420	R					GPR18;GPR18;UBAC2;UBAC2;UBAC2	NM_001098200;NM_005292;NM_001144072;NM_177967;NR_026644	Body;Body;Body;Body;Body						13:98705351-98705421
cg07790085	39663481	AAATAAAATTAAAACCAAAAAAATATTCAAAACCTAATCATACAAACCTC			II			AGCAGAGGGTGAGGTGGGGTTGAGGCCAGAAAGGTGTTCAGGGCCTGATCATGCAGGCCT[CG]AAGGCCAGAGTAAAGCATTTCCCCCAAGTTTTTATTTTGGAAAATTTCAAACCTATAGAA	37	13	29597447	CGAGGCCTGCATGATCAGGCCCTGAACACCTTTCTGGCCTCAACCCCACC	13	28495447	R					MTUS2	NM_001033602	TSS1500
cg12637085	29658363	AAAAATAAAATATCTTCCTCCCAAAAACCAATATAAACAACAAAATACCC			II			CAGAACCCACAGGGAATGGAATGTCTTCCTCCCAGGGGCCAATATAAACAGCAGGGTGCC[CG]GCTTTCCTAATTTAGTTGTTGGTGGCTCTGGCCAGCCAGAGAGGTCGTTTGAAAATACAA	37	13	114068181	CGGGCACCCTGCTGTTTATATTGGCCCCTGGGAGGAAGACATTCCATTCC	13	113116182	R								chr13:114066946-114067488	S_Shore
cg15800975	26762349	AAAAAATCATAACAATTAATCCACCATCACCAAACTAAAATCAAAATAAC			II			CTCCCGTTTAGGGGGAGTCATGACAATTAGTCCACCATCACCAGGCTGAAGTCAAGATAA[CG]CCAATCATACCTTTGGACAGGTGATTACCCAAGATAGCCACCAGAACAAGACACACAGGA	37	13	21541652	GGGAGTCATGACAATTAGTCCACCATCACCAGGCTGAAGTCAAGATAACG	13	20439652	R												TRUE
cg15978017	38670366	ATCAAATCTAAACAACAACACCATACCATACATAAAAAATCCACCCCCAC			II			TCTGATGGTGAATTGTAATCCTCAATGTTGGAGGTGGGGCCTGATGGGAGGTGTTTGGGT[CG]TGGGGGTGGATCCCTCATGCATGGCATGGTGCTGTTGTTTAGATCTGATTATCTGAAAGT	37	13	29042758	CGTGGGGGTGGATCCCTCATGCATGGCATGGTGCTGTTGTTTAGATCTGA	13	27940758	F	rs78248161				FLT1;FLT1;FLT1;FLT1	NM_001159920;NM_001160030;NM_002019;NM_001160031	Body;Body;Body;Body					TRUE
cg18468572	28622325	CACRTAACCCAAAACTAAAAACACAAAACTCCCACAAAAAAACCATCTCC			II			TCAGTGAAGCCCACGTGGCCCAAAACTGGAAACACAGAGCTCCCACAGAGGAACCATCTC[CG]GCCTTCCCAGCTCCAGCCTCTCCACGGTCTGTCCTTTCCCGGTGCTATTGCCAAACAACA	37	13	113731875	ACGTGGCCCAAAACTGGAAACACAGAGCTCCCACAGAGGAACCATCTCCG	13	112779876	R					MCF2L;MCF2L	NM_001112732;NM_024979	Body;Body	chr13:113731153-113731583	S_Shore				13:112779199-112780200
cg19364021	36699385	TAACAAAAACAAATCACAATAATAATAACCACTAACAAAAAAATACAACC			II			TCAGGCAGCGAATGGGAGGGCAGCTTGAACCCTCCCTGTTCTGGTGGGTGTTTTGGCCAG[CG]GCTGCATCCTTCTGCTAGTGGCCATCATCACTGTGACTTGTTCTTGCCAAGGCAAGGCTA	37	13	53776396	CGGCTGCATCCTTCTGCTAGTGGCCATCATCACTGTGACTTGTTCTTGCC	13	52674397	F								chr13:53774264-53776345	S_Shore				13:52672287-52674531			TRUE
cg19528830	69643401	ATCTCTCTTTCTTTCTCACATTATTTTCCCACAACCCTACTACCCTATAC			II			CACAACAGCAAATAAACAGAGAAAATTGTGGCGCTGAGACAATATGTCAGCTATGGAGGG[CG]TACAGGGCAGCAGGGCTGTGGGAAAACAATGTGAGAAAGAAAGAGAGACAGAGAGACAGA	37	13	113685296	TCTCTCTTTCTTTCTCACATTGTTTTCCCACAGCCCTGCTGCCCTGTACG	13	112733297	F	rs71836402	rs72661996			MCF2L;MCF2L	NM_001112732;NM_024979	Body;Body	chr13:113684525-113684991	S_Shore					13:113685261-113685535	Unclassified_Cell_type_specific
cg20039073	64729373	TAATCTTAAACTACTAAACTCTAACAATCTACCCACCTAAACATCCCAAC			II			AATCAGAGATTGAAACAAGGCTTGGGCTGAGCACGGTGGCTTACACCTATAACCCCAGCA[CG]TTGGGATGCCTAGGTGGGCAGATTGCTAGAGCCCAGCAGTTCAAGACCAGCTTGGGCAAC	37	13	53510197	GGTCTTGAACTGCTGGGCTCTAGCAATCTGCCCACCTAGGCATCCCAACG	13	52408198	F												TRUE
cg02201898	37678344	CAAAATCAAATAAAAAATACCCTTACAATAAACTACTAACCCCRCCTCAC			II			TCCAGGCTGATGCTGATGGTCACAGGCACGGTGGCATCAGGGAGCCGGGCCAGCAGGCGG[CG]TGAGGCGGGGCCAGCAGCTCACTGCAAGGGCATTTTCCACCTGATCCTGGTGTGCCCCAC	37	14	103376914	AGGATCAGGTGGAAAATGCCCTTGCAGTGAGCTGCTGGCCCCGCCTCACG	14	102446667	F								chr14:103373837-103374140	S_Shelf				14:102446635-102446907
cg05082965	39809338	AACCCAAACRAAACTACTCACCRCTACTAATAAAAAATAATACCCTAAAC			II			GGTGCCGGCCGGCGCGGGCATGGGGAGGGCCGGCGCCGCGGCCAACGGCACCCCGCAGAA[CG]TCCAGGGCATCACCTCCTACCAGCAGCGGTGAGTAGTCCCGCCTGGGCTGGGATAGTGCC	37	14	33404180	CGTCCAGGGCATCACCTCCTACCAGCAGCGGTGAGTAGTCCCGCCTGGGC	14	32473931	F								chr14:33402094-33404079	S_Shore		DMR		14:32472784-32474336			TRUE
cg06934680	44693492	ATTTTTCCTTTAAATAAAAACAATTAACCAACACAAACRACCACTCCAAC			II			ACGCATCTTCTCATGTAAGACGAGTTAACATGGTTTGGTATTCAATTTTTGGTAGTTCAC[CG]TTGGAGTGGCCGCCTGTGTTGGTTAATTGCCTTTATCCAAAGGAAAAATAAAACGTTATC	37	14	70884244	TTTTTCCTTTGGATAAAGGCAATTAACCAACACAGGCGGCCACTCCAACG	14	69953997	F					SYNJ2BP	NM_018373	TSS1500							14:70883254-70884280	Promoter_Associated
cg08139206	70707396	AAACACCCCATATTCTCTAAACAAACCAACTACTCCTTTAAACTCCTAAC			II			CATCCAGGAAAAAGCACCCCATATTCTCTAAACAAGCCAGCTGCTCCTTTGAACTCCTGA[CG]GCATCACACCCTCCCACTCCCATCCAGTTGCTCAGCGGTGAGCTGGCTGCCAGCTGCTGG	37	14	103748318	AGCACCCCATATTCTCTAAACAAGCCAGCTGCTCCTTTGAACTCCTGACG	14	102818071	R								chr14:103745232-103746271	S_Shelf			TRUE				TRUE
cg10074290	66759425	AACTAATAACCTAACCCCCAAACTTCAAACCRTTCCTAACCTAAAAAAAC			II			CTGACGGTGGTGGGAGGCAGACAGGTTTGTAGGCGCGAAGGGGTGGTTCGCTGGTGAAAC[CG]TTCCTTCAGGCCAGGAACGGCCTGAAGCCTGGGGGCCAGGCTACCAGTTCTGGGCGAAGT	37	14	44408417	ACTGGTAGCCTGGCCCCCAGGCTTCAGGCCGTTCCTGGCCTGAAGGAACG	14	43478167	F	rs75234042												14:43478078-43478274
cg14165308	57608391	AAAAACTATTTATATAAACAAAAATTCCRCTATAAATACRCTAATATCCC			II			GGCGGCCGGGACGCCGCTCCTACGGATGGGCGTGGGAGGCGCTCGCCATGCGCTGGCAGC[CG]GGATATTAGCGCATTTACAGCGGAATCTCTGTTTATATAAACAGCTCTTCCCACCCAGGC	37	14	37051703	AGAGCTGTTTATATAAACAGAGATTCCGCTGTAAATGCGCTAATATCCCG	14	36121454	F					NKX2-8;NKX2-8	NM_014360;NM_014360	5'UTR;1stExon	chr14:37049333-37051726	Island		DMR	TRUE	14:36119680-36121860			TRUE
cg17904717	72737380	AACATATTACATTTACTTCCAAATACTAAATCTAATAATCACAATTCAAC			II			CCCAGTCCAATGGCCAGAACTCATACTCCCACTCAGGGTGTTCCATTGCAGACCCTGTCT[CG]CTGAATTGTGATCATTAGATTTAGTATTTGGAAGTAAATGTAACATGTTATTAGTTTTCC	37	14	52793391	CGCTGAATTGTGATCATTAGATTTAGTATTTGGAAGTAAATGTAACATGT	14	51863141	F					PTGER2	NM_000956	Body					TRUE
cg19800856	50660379	TCAAAACTACTTAAAAATCTCTAAAAAAAAAATCCCATACCTAAACCCCC			II			CGGGGGCCACATCAGGGCTGCTTGGGGGTCTCTGGGGAGAGGGTCCCATGCCTGAGCCCC[CG]CCCGCCCTGCCTCCCAGGGTCTGGCGTGCGTCAGTACAAGGCTGCGGCTGGCGGAGCGCA	37	14	104645554	CAGGGCTGCTTGGGGGTCTCTGGGGAGAGGGTCCCATGCCTGAGCCCCCG	14	103715307	R					KIF26A	NM_015656	Body	chr14:104645553-104645762	Island
cg21207436	58801337	ATTTTACTAACCTAAAATATAACCCAAAACCCTAAAAACATCCACTTCTC			II			GCTACTTGAGAAGGCCTTTCCCCACAGGGTGACTTAAATGTCCCAGGCTGGAAGGTGGAG[CG]AGAAGTGGATGCCCCCAGGGCTCTGGGTCACACTCCAGGTCAGTAAAACAGCGAGTTTCC	37	14	74815316	TTTTACTGACCTGGAGTGTGACCCAGAGCCCTGGGGGCATCCACTTCTCG	14	73885069	F				TRUE	C14orf115;C14orf115	NM_018228;NM_018228	1stExon;5'UTR
cg01390082	32727308	TAAAAAAATAAAATCCTCATAAAACTTTCTTATAATTAAAAACATAAACC			II			TGTTGTGGTTATAAAGAGATGGGATCCTCATAGAGCTTTCTTATGGTTAGAGACATAGAC[CG]TGAGCACCATTGAACAGGCTGGGCTGCTGGGAAGGAAGGGAGAGCTCTTCTCATGATAGG	37	15	85365662	CGGTCTATGTCTCTAACCATAAGAAAGCTCTATGAGGATCCCATCTCTTT	15	83166666	R					ALPK3	NM_020778	Body					TRUE		15:85365635-85365756	Unclassified_Cell_type_specific
cg02030270	22802314	ACAAAACAAAATCCTCTTTACACTTCCCTCTTCTTACAAAACTATAAACC			II			GTATCCAAATTGCAAGACAAGGTCCTCTTTACACTTCCCTCTTCTTACAGAACTGTGAGC[CG]CATTGCCTGGAGTTGGGGAAGGGGTGATGCAAGCACTCCCTTGGCCACTCCAGCTGGTGT	37	15	84215725	CGGCTCACAGTTCTGTAAGAAGAGGGAAGTGTAAAGAGGACCTTGTCTTG	15	82006729	R					SH3GL3;SH3GL3	NR_026799;NM_003027	Body;Body					TRUE
cg07320850	38774382	AAACTAACATTCCCCTTTCTTCCATAACRTAAAAAAACTACRACTCCCCC			II			GGCTTTTCCCGGCCCGCGGGCCTGGGCGCTCCGGGGGAGGGAGCTCCAAGGGCAGGGTGG[CG]GGGGAGCCGCAGCTCCTCCACGTTATGGAAGAAAGGGGAATGCTAGCCCCCTGCGCCTCC	37	15	45422371	CGGGGGAGCCGCAGCTCCTCCACGTTATGGAAGAAAGGGGAATGCTAGCC	15	43209663	F					DUOX1;DUOXA1;DUOX1	NM_175940;NM_144565;NM_017434	5'UTR;TSS1500;5'UTR	chr15:45421236-45422394	Island					15:45421340-45422704	Unclassified	TRUE
cg10474377	28670437	AACTATCATATCCTCCAAATCCTACCAAATCAAACTAAAAATAATCCCCC			II			CCCGGTGCGCCTGCCAGGCTGCATTCCCAGAACCAGGGGCATGGGTTTGGAGGGAGCTAC[CG]GGGGACCATCTTCAGCCTGACCTGGCAGGACCTGGAGGACATGACAGCCTGTGAGGGGTC	37	15	42131658	CGGGGGACCATCTTCAGCCTGACCTGGCAGGACCTGGAGGACATGACAGC	15	39918950	F					JMJD7-PLA2G4B;JMJD7-PLA2G4B;PLA2G4B	NR_015346;NM_005090;NM_001114633	Body;Body;Body
cg13288361	35774487	AAAAAATAAATCCRAAACTCAACACAAAAAAATACTCCRCAAAACTCTCC			II			TCTGTAAAACCAAGGAATGAATCCGGGACTCAGCACAGGGGGATGCTCCGCAAGACTCTC[CG]GCGCCTGCGCGGCTCTTCCCCAGCTCCCCCTGCAGCTACGTCACCTCCCACGGCCTCCTC	37	15	101626347	AGGAATGAATCCGGGACTCAGCACAGGGGGATGCTCCGCAAGACTCTCCG	15	99443870	R		rs71979667						chr15:101626334-101626852	Island				15:99443870-99444423
cg13580002	15639428	AAACCTCATATATAACCTTACATATTTTAATAACCACRTTTTTAAAATAC			II			ATTTTCCATGCTTCTTTTAAAAAAATGTGGTGGCTACTTACCTGTTTGAGCTTGCAGGAG[CG]TATTTTAAAAACGTGGCTACTAAAATATGTAAGGTCACATATGAGGCTCACGTGTGTGCT	37	15	57626444	AGCCTCATATGTGACCTTACATATTTTAGTAGCCACGTTTTTAAAATACG	15	55413736	F												TRUE
cg13796110	38791375	CTAAAATAAACACACTACATATCCCCCTACAATAATAAAACCCACAAACC			II			GCAATAGAGACCTGGAGTGGGCACACTACATATCCCCCTGCAGTGATGGAACCCACAGAC[CG]CAGGTCCTCTGCAGTCCATTCTCCTGCCTGTCCAGAGGATCCGGATGTTTTCTCTTTACT	37	15	65337510	TGGAGTGGGCACACTACATATCCCCCTGCAGTGATGGAACCCACAGACCG	15	63124563	R					OSTBETA	NM_178859	TSS200
cg14573591	74609393	AATCCCTCRTTCTTATCTAAAAAAATTCCTATTACTTAATATATTAATCC			II			TGAGCCTCATTAGTCCCTCGTTCTTATCTGAGAAGGTTCCTATTGCTTGGTGTATTAGTC[CG]TTTTCATGCTGCTATAAAGATACTACCTGAATTGGGTAATTTATAAAGAAAGGAGGTTTG	37	15	75179096	CGGACTAATACACCAAGCAATAGGAACCTTCTCAGATAAGAACGAGGGAC	15	72966149	R								chr15:75182262-75182622	N_Shelf
cg18813177	66761411	CCTAACTTCTCAAAAACTATTCTCTATACCRAACRAACACCAATAACTCC			II			CTTCTGTGTGCCCTGGCTTCTCAGGAACTGTTCTCTGTGCCGGACGAGCACCAATGGCTC[CG]CTCCTCCTTGCTGCCTCCCTGAGTCGCTCTGTCCCTGGGACTGCTAAGGGCACGGGGCCT	37	15	93584909	CGGAGCCATTGGTGCTCGTCCGGCACAGAGAACAGTTCCTGAGAAGCCAG	15	91385913	R								chr15:93588102-93588570	N_Shelf				15:91385893-91385968
cg18817654	19750378	TATATATAATAAACCACACCCATCCACAACCATCRTTATAACTTTTAATC			II			GTAGTTCACCATGTGTGTGATGGGCCACACCCATCCACAACCATCGTTATAACTTTTGAT[CG]ATTTCAGATAATCTCCTCACCATTTTGCAATAATTTATCAACCGCAACCCTTCAGATACC	37	15	39485138	CGATCAAAAGTTATAACGATGGTTGTGGATGGGTGTGGCCCATCACACAC	15	37272430	R												TRUE
cg18980263	17660353	ATAAAATATCCAAAATTTCAAAACACTCTCCACATTAAACATATAACCCC			II			ACCCTTAAGAGATGGAGTGTCCAGAATTTCAGGGCACTCTCCACATTGGACATGTAGCCC[CG]AAGATTTCTCCTGGTCCTTAAAATGCCAGTACGGCATAAAGGCAGACAATGGGACTTTAG	37	15	97321776	CGGGGCTACATGTCCAATGTGGAGAGTGCCCTGAAATTCTGGACACTCCA	15	95122780	R
cg24035519	50623498	AAATCATTTACAAATAATCTTTCAAAAAAACAAACATCAAATACATATTC			II			CTCCACACGTCCTTTCTGAGGCACATTCATCAAAGGGATGAATAAGGTCCCGAGCAGCAC[CG]AATATGCATTTGATGTTTGTCTTCCTGAAAGATTACCTGTAAATGACCCATGTAAAATGT	37	15	94346356	GGTCATTTACAGGTAATCTTTCAGGAAGACAAACATCAAATGCATATTCG	15	92147360	F											CDMR
cg24728698	66662381	ATTTTATCTATTAAAATCTACTAACTACCTCATTAAAAATCCACATATTC			II			CCTACTATCTTCAGTTAGGATAACTGAGTATCAGATTAGTTTTCAGGGTGGGAACTGGCT[CG]AATATGTGGATTCCCAATGAGGTAGTCAGCAGACTTTAACAGACAAAATCATTCTTTTCT	37	15	97081353	TTTTGTCTGTTAAAGTCTGCTGACTACCTCATTGGGAATCCACATATTCG	15	94882357	F												TRUE
cg25513800	45622393	TCAAAATACAAACTATCCTTAACAAACACTCTTCCCRCTAACAAAAAACC			II			GAACATGAGCCTCAGGGTGCAAACTGTCCTTAGCAGACACTCTTCCCGCTAGCAAGGGAC[CG]CACCGTCACCTGAGGGGCAGCCAAGAGGCGGGCGGTGCACCTGTGCCTTCCAGAATAGGA	37	15	83314985	CAGGGTGCAAACTGTCCTTAGCAGACACTCTTCCCGCTAGCAAGGGACCG	15	81112040	R					CPEB1	NM_030594	Body	chr15:83315116-83317541	N_Shore							TRUE
cg27384569	10624453	AAAAACCAATACTAACATAACCCCATACAAAATATACAAACACRAAACCC			II			AGGGCCCGTGAAAAGACCAGTACTGACATAACCCCATGCAGGATGTACAGACACGGAGCC[CG]GCACGGGACAGCCCCCGAGCTTACTTAAATGAAAGAGCATCAACACAATGTTATAGAAAA	37	15	26927633	CGGGCTCCGTGTCTGTACATCCTGCATGGGGTTATGTCAGTACTGGTCTT	15	24478726	R					GABRB3;GABRB3	NM_000814;NM_021912	Body;Body					TRUE
cg00953006	67691484	CAAACACCTCTATAACCCCCCAAAAATATAAATAACCTAAAAAAAAAACC			II			GCCCTGCTGTGCAGACACCTCTGTGGCCCCCCAGGAGTGTGAGTGGCCTGGGGAGGGGGC[CG]TGGCACTGAGGCCGAAAGTGCCTGCCAGACGGCACGGTCTGGGTGCGGGTGTTCCCTGTG	37	16	633868	CGGCCCCCTCCCCAGGCCACTCACACTCCTGGGGGGCCACAGAGGTGTCT	16	573869	R					PIGQ;PIGQ	NM_148920;NM_004204	3'UTR;3'UTR	chr16:633867-634143	Island				16:573681-574208	16:633721-633876	Unclassified_Cell_type_specific	TRUE
cg01522083	14661401	RATACAAAAAATAACAACAAACRCTTCCACRCAAAAAAATCTATAAAACC			II			GACTCACCTACGATGCAGAAGGTGGCAGCAAACGCTTCCACGCAGGAAAGTCTGTAGGGC[CG]GCCATAGTTCACGGGGTTGGCGGCCACCAGGTAGGGCAACAGGCGCAAGTGGCTCCCTCG	37	16	1400861	CGGCCCTACAGACTTTCCTGCGTGGAAGCGTTTGCTGCCACCTTCTGCAT	16	1340862	R					C16orf42;GNPTG	NM_001001410;NM_032520	Body;TSS1500	chr16:1401334-1402348	N_Shore				16:1340145-1342349	16:1400843-1400879	Unclassified_Cell_type_specific
cg02412803	28690325	CTAAAACCTAATACATTCRAAAAACCCAAACTAACAACRATACAACAAAC			II			CCTCACCCCTGGGAGAGTCAACAGAGCCAGAGATGCCCGGGCCACCCCGCCCTCCTCGGC[CG]CCTGCTGCACCGCTGCCAGCCTGGGTCCTCCGAATGTACCAGGTCCCAGAAGCCCCGCCA	37	16	1099138	TGGGACCTGGTACATTCGGAGGACCCAGGCTGGCAGCGGTGCAGCAGGCG	16	1039139	F								chr16:1100626-1100848	N_Shore				16:1038591-1039152	16:1098370-1099278	Unclassified_Cell_type_specific	TRUE
cg03779072	39769454	ACTCAACAAAAAACCCAACCAAAAACAAATTCCACAAAAAAACATCCAAC			II			AGCTGTGGATTTTGGCTGCCCCCGCGGTCCCAGATCCGTGCTGCTGATGTCTGCTTGGCG[CG]CTGGATGCCTCTCTGTGGAATCTGTCCCTGGCTGGGTCTTCTGTTGAGCCCCCCTGTGCC	37	16	88186112	CTCAACAGAAGACCCAGCCAGGGACAGATTCCACAGAGAGGCATCCAGCG	16	86743613	F								chr16:88184856-88185101	S_Shore				16:86743370-86743705
cg04789818	16750360	ATCACAACAATATCTATACTATCCCCTAAAAATACCACACAACTTCCCCC			II			TGCCAGCCCTGATCACAGCAGTGTCTGTGCTGTCCCCTGGGGGTGCCACACAGCTTCCCC[CG]CTCCTACCTCCTCTGTGCTAATTGAGCCCTGGCTTGGTTGCATCTGCTTTGCTGGCAACT	37	16	49005567	CGGGGGAAGCTGTGTGGCACCCCCAGGGGACAGCACAGACACTGCTGTGA	16	47563068	R												TRUE
cg05184256	30617307	TTCCTTTTACCAAACTTCCACAAAAACCAAATAAACAATATAAACACTCC			II			AGTGATTCCTCTTCCTTTTGCCAAACTTCCACAGAAGCCAAATAAACAGTGTAGACACTC[CG]TCACTCGCTACGGCCACGGCGGCCACTCGGATCACACTCTGTCACTCACTACGGCCACGG	37	16	88155593	CGGAGTGTCTACACTGTTTATTTGGCTTCTGTGGAAGTTTGGCAAAAGGA	16	86713094	R								chr16:88155592-88156108	Island				16:86712997-86713609
cg05402622	60600306	AAAAATCCTTAAATAACACTAAATCAAACAAAAATAAACTATCCCTACCC			II			TTCCAGCCTTGAGGAGTCCTTGGGTGACACTGAGTCAGGCAGAGATGAGCTGTCCCTGCC[CG]GCCCCGCCCGATTTGCAAATTTGTGAGCAAAATAAACATGGTCTTTGTTTTCCGTCACTA	37	16	86666183	GGAGTCCTTGGGTGACACTGAGTCAGGCAGAGATGAGCTGTCCCTGCCCG	16	85223684	R													16:85223422-85223695
cg05509896	24608337	ACTAAAACCCTCAAACRAAAACTAAAAACCTCCCTCTACCTAAACTAAAC			II			ACCCCCTGGTGGCTGAGGCCCTCAAGCGGGAGCTGGGGGCCTCCCTCTACCTGGGCTGGG[CG]GCGGCTGCACTGCTTATGCTGGGCGGGGGGCTCCTCTGCTGCACGTGCCCCCCGCCCCAG	37	16	3063869	CTGAGGCCCTCAAGCGGGAGCTGGGGGCCTCCCTCTACCTGGGCTGGGCG	16	3003870	R					CLDN9	NM_020982	1stExon	chr16:3063679-3063981	Island				16:3003439-3003954			TRUE
cg05603908	68683475	AAACCCTTCRTAAACCTCAAACAAAAAATAATAAACAAAACCCTCCTCCC			II			TCGTGCCGTGAGCGATCCGGTCCAGCATCCCGGCGCTGGGAGCCGGCAGCTGCTGTGAGG[CG]GGAGGAGGGCTCTGTCCACTATTTCCTGCCTGAGGCCCACGAAGGGTCCCCCGCCCCAGG	37	16	88564112	CGGGAGGAGGGCTCTGTCCACTATTTCCTGCCTGAGGCCCACGAAGGGTC	16	87091613	F	rs968460				ZFPM1	NM_153813	Body	chr16:88564052-88564394	Island				16:87091554-87091980			TRUE
cg06009685	53662346	CCTCTAACTACTCAAAACTACATCAAACAATAAACTAAATCTTACTAAAC			II			AAACTCTTCCTCCTCTAGCTGCTCAAAGCTGCATCAAACAGTGGGCTGGGTCTTACTGAA[CG]GGTGTCCAGTACTTTCCTGTAGAAAACATTTTGATGTCCAAAGAGATAGATGTCCATAGT	37	16	77472697	CTCTAGCTGCTCAAAGCTGCATCAAACAGTGGGCTGGGTCTTACTGAACG	16	76030198	R								chr16:77468309-77469074	S_Shelf
cg06338958	73730350	RAACAAACTCCCACCTTCTCCAAAACCAAAAAACTCTTCTACAAAAAACC			II			AGGCCAGCCGCGGGCAGGCTCCCACCTTCTCCAGGGCCAGGAAGCTCTTCTGCAGGAAGC[CG]CACAGCTTGGCCTCCCTCTTCAGGAAGCGCAGGCTCACCTCTTCGCCGAGCTTGGTCACC	37	16	1489061	CGGCTTCCTGCAGAAGAGCTTCCTGGCCCTGGAGAAGGTGGGAGCCTGCC	16	1429062	R					CCDC154	NM_001143980	Body	chr16:1487017-1487260	S_Shore				16:1428758-1429136
cg07866823	74756418	RATATATAAACCATTCCTACCCCAAAAAACACAATAAACCRCAAAAAACC			II			CCCCTGAGGCCGGTATATGGGCCATTCCTGCCCCAGGAGACACAGTGAACCGCAAAGAGC[CG]TGTCACGGCGGTCCACCTGCTGCAGGCACGGCGCCGCACTGCTCTGAACGCTCGCTACTC	37	16	940197	CGGCTCTTTGCGGTTCACTGTGTCTCCTGGGGCAGGAATGGCCCATATAC	16	880198	R					LMF1	NM_022773	Body						16:880198-880253
cg08768435	55803431	TACCTATCTCCCCAAAACTACRACAAATCTACAAAAACCCTAAAACCCTC			II			TCAGCACCCGAGGGTGCGCAGTGAAGTCTGCCCAACGCCACGAAGAGGAGTCCCGGAACA[CG]AGGGTCTCAGGGTCCCTGTAGATTTGCCGCAGCCTTGGGGAGACAGGCAAGCCGTGGGCA	37	16	84215035	CGAGGGTCTCAGGGTCCCTGTAGATTTGCCGCAGCCTTGGGGAGACAGGC	16	82772536	F					TAF1C;TAF1C	NM_139353;NM_005679	Body;Body	chr16:84214835-84215036	Island				16:82772226-82772736
cg08797423	60638306	AAAAAATCAAATCTTTCRTAAACTCTATTCTAAAAAAAATCCCCTTACAC			II			CCAGACATGATCATATGTAACAAATGCAAAGCTGGGGCTTGAACATGGGCTCTGGGAGAA[CG]TGCAAGGGGACCCCTCTCAGAACAGAGCCTACGAAAGATCTGACCTTCCTGGTGCTTGCC	37	16	66502262	CGTGCAAGGGGACCCCTCTCAGAACAGAGCCTACGAAAGATCTGACCTTC	16	65059763	F					BEAN	NM_001136106	5'UTR
cg08835258	19694484	CCRTAACCCTACAAATAAACAACCACATCATAAAAATAATACAACAAATC			II			CTCTTGCTGAGCCGTGGCCCTGCAGGTGGACAGCCACATCATGAAGGTGGTGCAGCAGAT[CG]TGCACCAGGCTAGCGCCGGCCACCAGATCATCGTGCAGAACGTCACCATGGACGAGGAGA	37	16	2285252	CGTGGCCCTGCAGGTGGACAGCCACATCATGAAGGTGGTGCAGCAGATCG	16	2225253	R					DNASE1L2;E4F1	NM_001374;NM_004424	TSS1500;Body	chr16:2284626-2285598	Island				16:2224628-2225599
cg09427745	38688434	AATATAACTTTATAAAACTATACCTTAAAAAAAACCCTTAACCAAACACC			II			CTCAGTCCATGAGTATAGCTTTGTAAAACTATACCTTAAGAAAAACCCTTGGCCAGGCAC[CG]TGGCTCACGCCTGTAATCCCAGCACTTTGGGAGGCTGAGGCAGGCAGATCACTTGAGGTA	37	16	71932006	CGGTGCCTGGCCAAGGGTTTTTCTTAAGGTATAGTTTTACAAAGCTATAC	16	70489507	R	rs72801778				KIAA0174	NM_014761	5'UTR	chr16:71928861-71929953	S_Shelf
cg09633240	10615302	TTTTTAAATTTATTCAAAAACCATCTAAAAACATCCTCTACTCCAAAAAC			II			ACTCTGAATGTTTTTTAAGTTTATTCAGGAACCATCTAAAAGCATCCTCTGCTCCAGAGA[CG]CTGCTCTAATACAAATAACCACCTTGCAGTTTTCCATAAGGTTGCAGTGATGTGAGATGG	37	16	18135667	TTTTAAGTTTATTCAGGAACCATCTAAAAGCATCCTCTGCTCCAGAGACG	16	18043168	R												TRUE
cg09674048	50773351	AACATTCAAACCAAACCCATCCTACACCATAACCAAATACAAATACTATC			II			CGCCTCCTTCGTCTGCGACTTCTTTGTCTCTGGCGGTAATATCTGCTCCGGCTCTGGCTG[CG]ACAGCATCTGTACCTGGCCATGGTGCAGGATGGGCTTGGCCTGAATGCTCAGAGCAGGGC	37	16	11375073	GCATTCAGGCCAAGCCCATCCTGCACCATGGCCAGGTACAGATGCTGTCG	16	11282574	F					PRM1	NM_002761	1stExon
cg10166735	40601335	CTAAACCTTTCTAACCAAAAAAAACACAACCACTAAAATCTCTCTCTACC			II			GGGACAAGCACAAGGGACCCCGAGCAGGAGCTCTCACAAGAAGAGTGGCTCAGGGCTGCC[CG]GTAGAGAGAGATCTTAGTGGTTGTGCTCTTCCTGGCCAGAAAGGCTCAGCCCTAGCTTGG	37	16	1570449	TGAGCCTTTCTGGCCAGGAAGAGCACAACCACTAAGATCTCTCTCTACCG	16	1510450	F					IFT140	NM_014714	Body						16:1510176-1510918
cg16397028	32688421	CAATCAATCCTTTAAACCCAAAACACATCTTAAAAAAAAACATCCTCCAC			II			AGGGCATTAACACCAGAGCAAAGAGGCCGGGCTCGCCAGGCCCACAGCTTTGGGAGGAAA[CG]TGGAGGATGCCTCCCCCTAAGATGTGCTTTGGGCTCAAAGGATTGACTGGAGTTTGCCCC	37	16	72884581	CGTGGAGGATGCCTCCCCCTAAGATGTGCTTTGGGCTCAAAGGATTGACT	16	71442082	F					ZFHX3;ZFHX3	NM_001164766;NM_006885	Body;Body					TRUE
cg26564329	58808456	AAAAAACCTAATCRAACTTCAATCRAAACAAAAATCTCCCCTACAACAAC			II			GGGATCCCGTGAGCCTCAGCAGCCGGATGCCGAGCACTTCTGTTCTCCTTGTGTCCTGGG[CG]CTGCTGCAGGGGAGACTTCTGCCTCGATTGAAGTCCGACTAGGCCTCCCAGAGCAGGGGC	37	16	88057661	GGAGGCCTAGTCGGACTTCAATCGAGGCAGAAGTCTCCCCTGCAGCAGCG	16	86615162	F					BANP;BANP	NM_017869;NM_079837	Body;Body	chr16:88061122-88061595	N_Shelf				16:86615109-86615302	16:88057607-88059100	Unclassified_Cell_type_specific
cg26746669	12688334	ACCACATCACAAAAACCCATTAAAACRCTAAAAAAATAACACCCATAACC			II			AGTGCTGGGGAGTGGGGGGACCTTCTGGTTTTCCATAGGTCCCTCAGGATGGGTGGGTGG[CG]GCCATGGGTGTCATCTTCTTAGCGCTTTAATGGGTCTTTGTGATGTGGTCTCCGGTAGAG	37	16	50587910	CGGCCATGGGTGTCATCTTCTTAGCGCTTTAATGGGTCTTTGTGATGTGG	16	49145411	F					NKD1	NM_033119	Body				RDMR
cg27588083	20725462	AAAATAAAAAACCACCRCCTACCAAACCACTTATCCAAAAATTCACAACC			II			ACAGGGCAGGTGGTGGAGGGGTTAGAGGTGCCCTGAGCGCACATCCCACTCCATTACTTC[CG]GCTGTGAACCCTTGGACAAGTGGCTTGGCAGGCGGTGGCTTCCTACCTCAGCTGTGAAGT	37	16	87022565	CGGCTGTGAACCCTTGGACAAGTGGCTTGGCAGGCGGTGGCTTCCTACCT	16	85580066	F													16:85579864-85580286
cg03234188	63626409	CCAACTACCTATATAAAACCTTCTAATTTATTCTAAAACCCCCACCCCAC			II			GCTGGCTGGGCCCAGCTGCCTATGTAAGGCCTTCTAGTTTGTTCTGAGACCCCCACCCCA[CG]AACCAAATCCAAATAAAGTGACATTCCCAGCCTGCTCGTCCTGTCCTGGTGACTGGGGAG	37	17	74383906	CGTGGGGTGGGGGTCTCAGAACAAACTAGAAGGCCTTACATAGGCAGCTG	17	71895501	R					SPHK1;SPHK1;SPHK1;SPHK1	NM_001142601;NM_182965;NM_021972;NM_001142602	3'UTR;3'UTR;3'UTR;3'UTR	chr17:74378848-74382513	S_Shore
cg03917100	16619446	TACAAACAAACACACAACCACAAATACACACACAAATAAATAAATCCAAC			II			CTATAAAAGCATACAAGCAGACACACAGCCACAGGTACACACACAAGTGAATAAATCCAG[CG]ACGCCTGAGCAGGTCTCTCACCCCTCCTCCTGAGCCAGCAGAGGCCTGGCCCTGCCATGC	37	17	62016913	CGCTGGATTTATTCACTTGTGTGTGTACCTGTGGCTGTGTGTCTGCTTGT	17	59370645	R					SCN4A	NM_000334	3'UTR	chr17:62019023-62019319	N_Shelf
cg08972916	35606464	TAAACTACCTCTACTACTAAAAAAATACTACTATCCTAAAAAACRACTCC			II			AGGCTGTTCCCTGAGCTGCCTCTGCTGCTGGGAAAGTGCTGCTGTCCTGGGAGACGGCTC[CG]GCTGCTGACTTCCTGAGGCCCCAGCAACCTGGGGCTGGCTGAGGTCTGGTGGGGCCCCTG	37	17	73549091	GAGCTGCCTCTGCTGCTGGGAAAGTGCTGCTGTCCTGGGAGACGGCTCCG	17	71060686	R					LLGL2;LLGL2;LLGL2	NM_001015002;NM_004524;NM_001031803	Body;Body;Body					TRUE
cg10030648	61642496	TTTTTAAAAACCACACAAAAACATTTCCACTACCTACCTAAACTCCTAAC			II			ATAAATTCACTAAAGAGATGTGGTTAAATTTCTGCTGTAGTTAGATTACGTTGAGTGAAC[CG]TTAGGAGTTTAGGCAGGCAGTGGAAATGCTTTTGTGTGGCTCTTAAAAACAGCATGCAAA	37	17	11322852	TTTTAAGAGCCACACAAAAGCATTTCCACTGCCTGCCTAAACTCCTAACG	17	11263577	F		rs72635525	TRUE		SHISA6	NM_207386	Body
cg10618704	69639478	AAAACTAAACTATTATTTTACTACATACTAACTCCAAAACCCTAAACAAC			II			GGAGTCAGACCAGAGCTAAGCTGTTGTTTTACTACATACTAGCTCCAAGACCCTGGGCAA[CG]GCTCCAGCTTCAATTTCTCCAAGTGTAAAATGCAGATGATCACAGTATCTTTCTCAAAAG	37	17	9940970	GAGCTAAGCTGTTGTTTTACTACATACTAGCTCCAAGACCCTGGGCAACG	17	9881695	R					GAS7;GAS7	NM_201432;NM_201433	TSS1500;Body							17:9940957-9941001	Unclassified_Cell_type_specific
cg13269964	20728334	CTAAAAACAACAAACAACCCCATAACAAAACCAAAAACCRCATTCTAAAC			II			AAGACCCGTGTGACTGAAGAGGAGCTCACAGTTCCCAGCGTCTGCTCCCACGGTGTCCAG[CG]CCCAGAATGCGGCTTCTGGTCCTGCTATGGGGTTGCCTGCTGCTCCCAGGTGAGATGGGG	37	17	41924577	CGCCCAGAATGCGGCTTCTGGTCCTGCTATGGGGTTGCCTGCTGCTCCCA	17	39280103	F				TRUE	CD300LG;CD300LG;CD300LG;CD300LG;CD300LG;CD300LG;CD300LG;CD300LG	NM_001168323;NM_001168324;NM_001168324;NM_145273;NM_145273;NM_001168322;NM_001168323;NM_001168322	5'UTR;5'UTR;1stExon;1stExon;5'UTR;5'UTR;1stExon;1stExon					TRUE
cg14422451	25662415	AATACACAAAAAATTACAATATAAATAAACATTAACRCCACTAAAAACAC			II			CAGGGAGACCCAGTACACAAGAAATTGCAGTGTAAGTGAGCATTAGCGCCACTGGAGGCA[CG]CACAGGGGACTGTGAGTGCACAGAGGAAAAAGAGATTCGCTGCTTCCAGGGAAGACATTA	37	17	41929283	GTACACAAGAAATTGCAGTGTAAGTGAGCATTAGCGCCACTGGAGGCACG	17	39284809	R					CD300LG;CD300LG;CD300LG;CD300LG	NM_001168324;NM_145273;NM_001168323;NM_001168322	Body;Body;Body;Body
cg15224383	45748342	AACCTAAATAAAAAACCRTACCRAACTCTAAACTCACCTCCCCCTTAAAC			II			TGATACTTCTCAGCCTGGGTGAGGGGCCGTGCCGGGCTCTGAGCTCACCTCCCCCTTGGG[CG]TTGTCACTGCAGTCCGGCGGGGGTCGATGTCCTCGTTGATGCTGGACAGGAAGTTCTGGG	37	17	975866	CGCCCAAGGGGGAGGTGAGCTCAGAGCCCGGCACGGCCCCTCACCCAGGC	17	922616	R					ABR;ABR;ABR	NM_021962;NM_001092;NM_001159746	Body;Body;Body	chr17:975592-975902	Island				17:922384-922652
cg15326656	49756494	AAAAAAAATTCTACATACAATTTCACCCCRATTTACCTCACCCCTACCAC			II			CCCGGATCTAAGGAAGGAATTCTACATGCAGTTTCACCCCGATTTGCCTCACCCCTGCCA[CG]GCTCCAACGCAGCCACGCGGCACCCCCAGACCCGGGCCCACGTGGCCGCTCCTCACAGTG	37	17	80918416	GAAGGAATTCTACATGCAGTTTCACCCCGATTTGCCTCACCCCTGCCACG	17	78511705	R					B3GNTL1	NM_001009905	Body	chr17:80918218-80919258	Island				17:78511095-78512508
cg15682851	63754474	ACACAAAACAAAATATAACAAAACCCAAAAACCCCCAAAAATACATAAAC			II			CACCCACAAGGTGCTCCCTTCCCCCTAGCCTGAATCTGCTGCTCCCCGTCTGGGGTTCCC[CG]CCCATGCACCTCTGGGGGCCCCTGGGTTCTGCCATACCCTGCCCTGTGTCCCATGGTGGG	37	17	44076429	CACAGGGCAGGGTATGGCAGAACCCAGGGGCCCCCAGAGGTGCATGGGCG	17	41432266	F	rs62063856				STH;MAPT;MAPT;MAPT;MAPT;MAPT;MAPT	NM_001007532;NM_016835;NM_001123067;NM_016834;NM_005910;NM_001123066;NM_016841	TSS200;Body;Body;Body;Body;Body;Body
cg16557906	11652410	TATACTTACRACAACAAACAACACAACAATCCCACCTAAAATAACCCCAC			II			GGATCGTCATGTATACTTACGGCAACAAGCAGCACAACAGTCCCACCTGGGATGACCCCA[CG]CTGGCCATCGCCCTCGCCGCCAATGCCTGGGCCTTCGTCCTCTTCTACGTCATCCCCGAG	37	17	72436751	ATACTTACGGCAACAAGCAGCACAACAGTCCCACCTGGGATGACCCCACG	17	69948346	R					GPRC5C;GPRC5C	NM_018653;NM_022036	Body;Body						17:69947891-69948366
cg16637813	25655412	AAAACCCCACACTAAACAAAAATTATACCAAAACCCTTAACAAAACATTC			II			TCAGCTTCTAAGAGGCCCCACACTAAGCAAGGATTATGCCAAAACCCTTAACAAGGCATT[CG]AGGCCATTCAGAACATAGGCTTAACCCACCTCCCCAGCAAAACCCACCACCATCCTCCCC	37	17	41900587	AGGCCCCACACTAAGCAAGGATTATGCCAAAACCCTTAACAAGGCATTCG	17	39256113	R					MPP3;MPP3	NM_001932;NR_003562	Body;Body					TRUE
cg16841761	58644329	TATAACAACTCTAAAAATCAATTATTCCCCCTTCTTAAAAATTTATTCCC			II			ACACATGACAAAAAACACATACTTTACCATCTTAGTTCAAAAAAGTCACTAAACAAACAA[CG]GGAACAAATCTTCAAGAAGGGGGAACAACTGATTTCCAGAGTTGCCACATTATATTGTTT	37	17	65044234	CGGGAACAAATCTTCAAGAAGGGGGAACAACTGATTTCCAGAGTTGCCAC	17	62474696	F					CACNG1	NM_000727	Body	chr17:65040729-65041029	S_Shelf					17:65044109-65044266	NonGene_Associated_Cell_type_specific
cg17233517	63742346	TATCCATCCTAACTCCTCCAATAAATACAAAAACTTATATATCTCTCCCC			II			AGTTCAGCGTGTATCCATCCTGACTCCTCCAATAAATGCAGAAACTTGTATGTCTCTCCC[CG]ACAACTGGATTATCATATACATTATTCAAGCATAGGCTTTAGACTCAGACATATCTACAT	37	17	45285328	CGGGGAGAGACATACAAGTTTCTGCATTTATTGGAGGAGTCAGGATGGAT	17	42640327	R					MYL4;MYL4	NM_001002841;NM_002476	TSS1500;TSS1500
cg19933343	66605402	TAAATAATATTAACCTAAACATCACTTAAAACTCTAAAACAACAAAAAAC			II			CAGCGGTGGCGTAAGTAGTGTTGACCTGGACATCACTTAAAGCTCTGGAACAGCAAAGGG[CG]TACAGTGGAGACGACTGCAATACATACTTAACAGTTTAAAAATGTATAATATTTGGGACA	37	17	71241372	CGCCCTTTGCTGTTCCAGAGCTTTAAGTGATGTCCAGGTCAACACTACTT	17	68752967	R					C17orf80;C17orf80;C17orf80	NM_017941;NM_001100621;NM_001100622	Body;Body;3'UTR
cg23660949	49637331	AACTAAAAATTTTCCAAAACTTCCRCRTTTATCTAAAACACATTCTCCCC			II			GCACCTGCCAGGGCTGAGGGTTTTCCAAAGCTTCCGCGTTTGTCTGGGACACATTCTCCC[CG]TCCCCCCATCCCCCCATCCCCCCATCCCCCCATCCCCCCATCCCACGGGGACACCCGGGT	37	17	79072761	CGGGGAGAATGTGTCCCAGACAAACGCGGAAGCTTTGGAAAACCCTCAGC	17	76687356	R					BAIAP2;BAIAP2;BAIAP2;BAIAP2	NM_017450;NM_006340;NM_001144888;NM_017451	Body;Body;Body;Body						17:76686923-76687698
cg24500145	71643490	AAATTCTAAAATTCTATATAATTAAAATATAAAAATCACCTAACAAACCC			II			GAGTATCTAGAAAATTCTAAAGTTCTGTATGGTTGGGATGTAGGGGTCACCTAGCAGACC[CG]TGAGAGATGAGATAGGAGAAATAGACAGGAGCCAGGGTACAGAAGGCCTTGCAGTTGAGG	37	17	67430018	CGGGTCTGCTAGGTGACCCCTACATCCCAACCATACAGAACTTTAGAATT	17	64941613	R					MAP2K6	NM_002758	Body					TRUE
cg25002069	49708359	CTCCAAAAATTATCTTCCAATTCAACAAAAACTCTATATTTCCCACCTTC			II			CAGGAATGGGATGACCTGTGGGATGGCATCCCACCCTGAGAGGTCCCTGAGGGGCAGACC[CG]AAGGTGGGAAATACAGAGCTTTTGCTGAACTGGAAGATAATTCCTGGAGATGAGGCAGTC	37	17	29937616	TCCAGGAATTATCTTCCAGTTCAGCAAAAGCTCTGTATTTCCCACCTTCG	17	26961729	F		rs61064609										TRUE		17:29937609-29937636	Unclassified_Cell_type_specific
cg27038367	67609395	ACATTAATTTACRATTAACTCAATACATACCCACTAACRCTACAAAAACC			II			TTTCATCTGTCACATTAGTTTACGATTGGCTCAATGCATGCCCACTAACGCTACAGGGGC[CG]CTCTGCCAGCCCCCCGCATGCCGATGGTCTTTTCCCGTCTGCGCCGGATTTACGCCTCTC	37	17	79253785	CGGCCCCTGTAGCGTTAGTGGGCATGCATTGAGCCAATCGTAAACTAATG	17	76868380	R					SLC38A10;SLC38A10	NM_001037984;NM_138570	Body;Body	chr17:79254407-79254608	N_Shore				17:76868368-76868619
cg27253454	55702315	AATTAATCTAAAATTCTAAAACRAAACCTTCAACAAACTTAACAACCTCC			II			AGGCACTGTGAGGTTGGTCTGAAGTTCTGAGACGGAGCCTTCAGCAGACTTAGCAGCCTC[CG]AGGATAGCTGACCTTGGCTTACTGGCAGTTTTGGGTATTTCTGTTTGGAACATCAGTCCT	37	17	9603340	CGGAGGCTGCTAAGTCTGCTGAAGGCTCCGTCTCAGAACTTCAGACCAAC	17	9544065	R					USP43	NM_153210	Body
cg19077165	40638479	ATCTAAATTTCACAAAATCRCTAATTAAATTATATCCCCTTCCCCRAAAC			II			TGCCCGGACATGTCTGAGTTTCACAGGGTCGCTGATTGGATTATGTCCCCTTCCCCGGAA[CG]AATGCTTTTCTGTCTTCCTTAAGGGTAGTATCTCTGTGGCACCCTGTTCTGGCTCCTTAC	37	18	44547161	CGTTCCGGGGAAGGGGACATAATCCAATCAGCGACCCTGTGAAACTCAGA	18	42801159	R					KATNAL2	NM_031303	5'UTR	chr18:44548964-44550756	N_Shore
cg20794690	53612396	AAAAAATTATAACTTAAAAACATATATACAAAAAATACRTATAACCACAC			II			GAACCAAGAAGGGAAAGTTGTAGCTTAAGAACATGTATACAGAAGATACGTGTAACCACA[CG]CTGTTTGTCCTTCTGCTGAATGAGTTTTTCAGATTAATACATCATTCATCAGACTTCATT	37	18	9886405	GAAAGTTGTAGCTTAAGAACATGTATACAGAAGATACGTGTAACCACACG	18	9876405	R					TXNDC2;TXNDC2;TXNDC2	NM_001098529;NM_001098530;NM_032243	Body;5'UTR;5'UTR
cg24182329	67725334	CAAAATCACACTATCCTATAAACRCATCACAATAATCAAACCAAAACCAC			II			GTATAAGCACCTTGAGGACAAGCACTGTGGCTTGATCACTGTAGTGCACTCAGAGGACAG[CG]TGGTCCTGGCTTGATCACTGTGATGCGCTCATAGGACAGTGTGATCCTGGCTTGATCACT	37	18	32334456	AGGATCACACTGTCCTATGAGCGCATCACAGTGATCAAGCCAGGACCACG	18	30588454	F					DTNA;DTNA;DTNA;DTNA;DTNA;DTNA;DTNA	NM_001128175;NM_001391;NM_032978;NM_001390;NM_001392;NM_032979;NM_032975	5'UTR;TSS1500;5'UTR;TSS1500;5'UTR;5'UTR;5'UTR
cg01416317	37720487	TTCCAACACCTTAATACCATAAACRCTTACAATCCTAAAATAAAAACTCC			II			CGAGGCGATCTAGAGTGTAAGTGTTGACAGAGCGCTGAGGTTTTTGGACCACAGTGGTGC[CG]GAGCTCTTATTCTAGGACTGCAAGCGTCCATGGTACTAAGGTGCTGGAACCGGAAGCCTC	37	19	45737208	TCCAGCACCTTAGTACCATGGACGCTTGCAGTCCTAGAATAAGAGCTCCG	19	50429048	F	rs346750				EXOC3L2	NM_138568	5'UTR	chr19:45737482-45738145	N_Shore				19:50428993-50429985
cg02717840	25639351	ATCAAAATAACRATCTAAAATACTTTCCAATAAAAACACACAAAAACTAC			II			CTTATTCTCCCCAGTTCACTCTTTCTCCCCGGGTGATTGAGTGTGGATCAAGGACTGGAA[CG]TAGCCCCTGTGTGCCCCCACTGGAAAGTACCCCAGACCGTCATCCTGACCACTCCCACCG	37	19	53463943	CGTAGCCCCTGTGTGCCCCCACTGGAAAGTACCCCAGACCGTCATCCTGA	19	58155755	F					ZNF816A	NM_001031665	5'UTR	chr19:53465730-53466323	N_Shore
cg03757653	55728449	CTTATCRCTATCRAAATTCAAATCCACRAACATCTTCAAAATAAACTCCC			II			CTGGGGCACAGCCTCACCCTCTGCCCTCCCCCAGGTCCCCAGCGGGACGCCCAGGCGGCG[CG]GGAGTTCATCCTGAAGATGTTCGTGGACCTGAACCCCGACAGCGACAAGATCATCTACTC	37	19	3121013	TTGTCGCTGTCGGGGTTCAGGTCCACGAACATCTTCAGGATGAACTCCCG	19	3072013	F					GNA11	NM_002067	Body	chr19:3120994-3121291	Island				19:3072000-3072289	19:3120695-3121116	Unclassified_Cell_type_specific
cg04253011	14801505	CTAAAAAAATCCCAAACAAATCAAACTTAAAAAATCACTCRCATACTCAC			II			GTGTCAGGTCTGGGCTCACGATGAATCCAAGAATCATATGGGGCCTGAAGGCCGAGACAG[CG]TGAGCATGCGAGTGACCCCCTAAGCCTGATTTGCCTGGGACTTTTCCAGTTTTAGCACTG	37	19	39906496	TGGAAAAGTCCCAGGCAAATCAGGCTTAGGGGGTCACTCGCATGCTCACG	19	44598336	F					PLEKHG2	NM_022835	Body	chr19:39903036-39904490	S_Shelf							TRUE
cg04604505	62690460	CAACCTACRACAACTATATCTAATAATAAAAACTACTAAAACCTACATCC			II			TCCCTCAGTGCCCACCGGGTGATGGTGGCAGATTTTCCATCCGCATTGCTCCCGGACATG[CG]GATGTAGGTTTCAGCAGTTCCCATCATTAGACACAGTTGCCGTAGGCTGGGTTCTTAGTA	37	19	1922613	AGCCTACGGCAACTGTGTCTAATGATGGGAACTGCTGAAACCTACATCCG	19	1873613	F	rs35881547				SCAMP4	NM_079834	Body	chr19:1924512-1924775	N_Shore
cg04613452	46669321	CTCTAATATTCCCCATCTCACCTTAACAATCTATATCAAACAAAAAACAC			II			GCAGCAGCTGACTCTGATATTCCCCATCTCACCTTAGCAGTCTATATCAAGCAAAGGGCA[CG]CAGAATCCCATGCACCCATCATGTATGTAATAAAAGGCAGATATTATGTGGTCTCTTGAA	37	19	14843922	TCTGATATTCCCCATCTCACCTTAGCAGTCTATATCAAGCAAAGGGCACG	19	14704922	R		rs2732798			EMR2;EMR2;EMR2;EMR2;EMR2;EMR2;EMR2	NM_152916;NM_152919;NM_152921;NM_152920;NM_152918;NM_152917;NM_013447	3'UTR;3'UTR;3'UTR;3'UTR;3'UTR;3'UTR;3'UTR
cg07538634	55698433	AAACCCTAACCRCCTAATAAAAATTTCRTAAAAAAATCTACCATCCAATC			II			ATAAGGGAGAGACGGCACCAGCCAGCCCCTCACCACCCCCCGGGAAGACATGACGAAAAT[CG]ACTGGATGGTAGATTTTCTCACGAAACTTTCACTAGGCGGCCAGGGCTCTGGTGGGTACA	37	19	3825141	CGACTGGATGGTAGATTTTCTCACGAAACTTTCACTAGGCGGCCAGGGCT	19	3776141	F					ZFR2	NM_015174	Body	chr19:3825120-3825516	Island
cg10384570	31632423	TAAAATACATTCTCCACCTAACAAAAATAATCTTTACAAAATATAAATCC			II			ACGGTGCAGGCCTGGTAGGGTTTTATTCTATTCACAGTGGGAAGAAGGGAGTGTCAAAAT[CG]GATTTACATTTTGTAAAGATTATTTCTGCCAGGTGGAGAATGTACCTTAGAGCAGCGGTC	37	19	41947118	CGGATTTACATTTTGTAAAGATTATTTCTGCCAGGTGGAGAATGTACCTT	19	46638958	F					ATP5SL;ATP5SL;ATP5SL;ATP5SL;ATP5SL	NM_001167869;NR_030765;NM_018035;NM_001167870;NM_001167871	TSS1500;TSS1500;TSS1500;TSS1500;TSS1500	chr19:41945690-41945904	S_Shore
cg13126655	28613486	TAACTACCCATCTCCCTCTCCTATTCCCCAAATAATCTCTAAAACTAAAC			II			GGGGCTGACGGGCTGCCGAGACCCTGGGCCCACGTGACGGACAGGTGGGGCCGGCCTGCG[CG]CTCAGTTCCAGAGACCACCTGGGGAACAGGAGAGGGAGATGGGCAGTCAGCCCCAAAGCG	37	19	5997434	GACTGCCCATCTCCCTCTCCTGTTCCCCAGGTGGTCTCTGGAACTGAGCG	19	5948434	F	rs672355				RFX2;RFX2	NM_000635;NM_134433	Body;Body	chr19:5997031-5997435	Island				19:5946931-5948788
cg13300756	40748509	CTAAAACCRAAACTATAAATAAACATCTATCCATTCAACRCCTAACTAAC			II			GGCACGGCTGCCTGGAACCGGAGCTGTGAGTGAACATCTGTCCATTCAGCGCCTAACTGA[CG]TGGGTCTGCGTGTGTGCACCAGGGTCTGGGGTGGAGAGCTGGGGCGCTGGGATTTGTATC	37	19	52228038	TGGAACCGGAGCTGTGAGTGAACATCTGTCCATTCAGCGCCTAACTGACG	19	56919850	R				TRUE	HAS1	NM_001523	TSS1500
cg14322697	38668341	AAAATATAAATCAAATAAATATATACCTAACCCRCCCAAATACAAATAAC			II			CTCTGGGACATGAGATATGGGTCAAGTGAGTGTGTACCTGGCCCGCCCAGGTACAGGTGA[CG]GTAAACAGGCCAAGTCTGGGTGTACCTGTGGACAGGAGAGTCCAGGCTAGGTGATTAGAG	37	19	8594220	AGATATGGGTCAAGTGAGTGTGTACCTGGCCCGCCCAGGTACAGGTGACG	19	8500220	R		rs74801269			MYO1F	NM_012335	Body	chr19:8595086-8595471	N_Shore
cg15651980	74612458	ACCATCCCTTCCCAACAAACTCCTAACTTTAATCTATCATTAACTAAATC			II			GAGGTGTGGAAAGCGAGAGTCCAGAGGATGGGCAGGAGGATGAAGGCTTATGGTGGAGGC[CG]ACCCAGCCAATGACAGATCAAAGCCAGGAGCCTGCTGGGAAGGGATGGTAGAGGCTGGAG	37	19	48903304	CCATCCCTTCCCAGCAGGCTCCTGGCTTTGATCTGTCATTGGCTGGGTCG	19	53595116	F					GRIN2D	NM_000836	Body	chr19:48901804-48902123	S_Shore		CDMR			19:48902926-48903983	Unclassified_Cell_type_specific
cg17379828	11719488	CCTCCAAAAACAAACATCTAACCCAATCCAAATCCCAAAAAAACRAAATC			II			AGAGCTATCTGGGGAGGGGGAGAGGAGGCCGAGCAGAATACACCCCAGAGTTAGGGTTTG[CG]ACTCCGCCTCCCTGGGACCTGGATTGGGTCAGATGCCTGTCCTTGGAGGGGACAAGGTTG	37	19	55998732	CTCCAAGGACAGGCATCTGACCCAATCCAGGTCCCAGGGAGGCGGAGTCG	19	60690544	F		rs80227569			NAT14;SSC5D	NM_020378;NM_001144950	3'UTR;TSS1500	chr19:56000722-56001026	N_Shore		RDMR	TRUE
cg20082196	44630335	TAACRAATCTAAATAACCTAACACATTAAATAATCRCTTATTTAAACAAC			II			GCCCTGCAGATGTCCAAATGGCTCCCTGCAGCAGCCCCTGCCACACTGTTCTGACAATCA[CG]CTGCCCAAATAAGCGACCATCCAATGTGTCAGGCCACTCAGATCCGCCACCTGCCTGCAC	37	19	49116824	CGCTGCCCAAATAAGCGACCATCCAATGTGTCAGGCCACTCAGATCCGCC	19	53808636	F					FAM83E	NM_017708	TSS200	chr19:49116245-49116641	S_Shore
cg20513206	45804301	AAAAACACCATATCAAACTAAACCTACCACAAAAATAAACTCACAAAATC			II			CCAATCCCAGCTTCATCTGCAAAATGCACACGGGGACATCCACATCAGGGCTGAGTGTGA[CG]ATTCTGTGAGTTTATTCTTGTGGTAGGCTCAGCTTGACATGGTGTTTTTGGCTAATATTG	37	19	40855502	AAAACACCATGTCAAGCTGAGCCTACCACAAGAATAAACTCACAGAATCG	19	45547342	F				TRUE	PLD3;PLD3;C19orf47	NM_012268;NM_001031696;NM_178830	5'UTR;5'UTR;TSS1500	chr19:40854180-40854733	S_Shore
cg21697944	49720391	CTCTCCAACTAAATTTACTCTCAACCCTAAATTATTCTAAATCAATCCCC			II			TCCCCTCCCCTCTCTCCAGCTAAATTTACTCTCAGCCCTGAGTTATTCTGGGTCAGTCCC[CG]CCTGCCTGCCTCCTGCTCCTCCTCCTCCCAGCTGGGGAGGGGACCAGTGAGGGGTCTCTC	37	19	49658797	CGGGGACTGACCCAGAATAACTCAGGGCTGAGAGTAAATTTAGCTGGAGA	19	54350609	R					HRC	NM_002152	TSS200	chr19:49660880-49661157	N_Shelf
cg22765612	62801364	CRAACTCCTTAAACTAAACACAAAATAAATACAAATCAAACCACTCAACC			II			TGCGCACGCTGAGGTTCCAGGCTGGAGGCAGGAAGGTGGCACGGTGTCTGGGGAGACCCA[CG]GCTGAGTGGTCTGACCTGCACCTACCCTGTGTTCAGCCTAAGGAGCCCGCAGTCCCCGGG	37	19	5237246	CGGCTGAGTGGTCTGACCTGCACCTACCCTGTGTTCAGCCTAAGGAGCCC	19	5188246	F					PTPRS;PTPRS;PTPRS;PTPRS	NM_130855;NM_002850;NM_130854;NM_130853	Body;Body;Body;Body	chr19:5237294-5237669	N_Shore				19:5188097-5190016
cg24694329	54804390	AACCTTCCAAAATCCTAACCAAACAAAAATCAAACACCCCATACTCTTCC			II			CTGCGGCCCTTGGCCTTCCAGGGTCCTGGCCAGGCAGGGGTCAGGCACCCCATACTCTTC[CG]TGTGGCACAGGTGTCCACCCACCCCCACTGGCCACAGACACCATTCTCCCCCTGGGAGCA	37	19	18892320	CGGAAGAGTATGGGGTGCCTGACCCCTGCCTGGCCAGGACCCTGGAAGGC	19	18753320	R					CRTC1;CRTC1	NM_015321;NM_001098482	3'UTR;3'UTR	chr19:18888032-18888969	S_Shelf					19:18892086-18892523	Unclassified_Cell_type_specific
cg25196389	23701309	ATCAAAACTAAAAAAAACTCCACAATATAACCCTTCCAAACCCAAAAAAC			II			CCACAGGTAAAATCAGGGCTAGGAAGGGCTCCACAGTGTAGCCCTTCCAGGCCCAGGGAG[CG]CCGCGAACTCGACAGGGCCACACATCGAGGCCTGCGCAGCCGCGGCCCAGCACTCCACGA	37	19	46806999	TCAGGGCTAGGAAGGGCTCCACAGTGTAGCCCTTCCAGGCCCAGGGAGCG	19	51498839	R					HIF3A;HIF3A;HIF3A	NM_022462;NM_152795;NM_152794	5'UTR;Body;Body	chr19:46806998-46807617	Island				19:51498839-51499729
cg26229361	13710429	TTATATAAATAAAACCTAAAAAATTCCTCCCAACAACCCTAAAAAAACCC			II			CGTATGGGTTTTTATGTGGATGGGGCCTAGGGAATTCCTCCCAGCAGCCCTGAGGGAGCC[CG]GGCGTGATGTTCCCCCACGTCCCGGAGGAGAAAACAGGGCTAAGAGAGGTCAGGTGGGAT	37	19	750564	TATGTGGATGGGGCCTAGGGAATTCCTCCCAGCAGCCCTGAGGGAGCCCG	19	701564	R					C19orf21	NM_173481	TSS1500	chr19:746300-747161	S_Shelf							TRUE
cg27259323	67647374	CRATTAACTAACRAAATCRATAACRCCAAACACAAAATACTAAACCTACC			II			GCTCGAACAATCGATTGGCTAACGAGGTCGATGACGCCAGGCACAAGATGCTGGGCCTAC[CG]CGGTAGCGTGAGGGAAGCCGTGCGTTCTGTTCCAAGGCATCTGTGAGCCCATGGAGTATA	37	19	14600134	GATTGGCTAACGAGGTCGATGACGCCAGGCACAAGATGCTGGGCCTACCG	19	14461134	R					LOC100130932;GIPC1;GIPC1;GIPC1;GIPC1;GIPC1;LOC100130932;GIPC1	NM_001146693;NM_202469;NM_202467;NM_202470;NM_202494;NM_202468;NM_001146693;NM_005716	1stExon;5'UTR;5'UTR;5'UTR;5'UTR;5'UTR;5'UTR;5'UTR						19:14461096-14461143
cg27270830	54761378	TACTTCTACCAATTACCCACRAAATACTCCRATTCCATAATATAATAAAC			II			CGTCCACGTTGTGCTTCTGCCAGTTGCCCACGGGGTGCTCCGGTTCCATGGTGTAGTAGA[CG]CGGTAGCCGCGGATCAGGCCGTTGGGCTCCACCGGCTCCTCCCACTGCACAATCATGGTG	37	19	5244098	GCTTCTGCCAGTTGCCCACGGGGTGCTCCGGTTCCATGGTGTAGTAGACG	19	5195098	R		rs73545312			PTPRS;PTPRS;PTPRS;PTPRS	NM_130855;NM_002850;NM_130854;NM_130853	Body;Body;Body;Body	chr19:5243869-5244393	Island				19:5194832-5195393
cg27648056	54633347	CAAACCCRCCTAACTTTCTTAACATAAAATTAAAAATAACAAAACCCCCC			II			GGAGGTTCCACCAAGCCCGCCTAGCTTTCTTGACATGGGGTTGGGGGTGGCAGGGCCCCC[CG]GGAGATAGGGAGTGTTAGGGGGCTCCCGGAGGTGAGGGCTCCCTGGCCTTCTGCATACCC	37	19	18085190	CGGGGGGCCCTGCCACCCCCAACCCCATGTCAAGAAAGCTAGGCGGGCTT	19	17946190	R					KCNN1	NM_002248	Body	chr19:18084635-18085073	S_Shore
cg02216206	17600485	ATCAAACRACAAATCCCTCCTTACATCTATAACCCCCAAACCTAATATAC			II			ATGCCAGGCTGGGCCGCGGTGCCCCCTCTTCCTAGGGCCCCGGGACACTTGTGCAGGTGA[CG]CACACCAGGCCTGGGGGCCACAGATGCAAGGAGGGATCTGCCGCCTGACAGCCGGCTGGG	37	20	62465502	CGCACACCAGGCCTGGGGGCCACAGATGCAAGGAGGGATCTGCCGCCTGA	20	61935946	F								chr20:62462511-62464091	S_Shore
cg02379079	61770507	AACTATCCCAACTATAAATTAAACCCAAATCCCTTAAATAACCAAAACTC			II			CTGTGCCTCCCCTTCCCGCTCCCAGGAACCCATCCAGCCTCAGGAACTGCCCCCAGCCAT[CG]AGCCTTGGCTACTTAAGGGACCTGGGCCCAATCCACAGCTGGGACAGTCCTGGCCCACTG	37	20	36974843	CGAGCCTTGGCTACTTAAGGGACCTGGGCCCAATCCACAGCTGGGACAGT	20	36408257	F	rs2232579				LBP	NM_004139	TSS200			low-CpG:36407891-36408303
cg03726785	10780435	TACCTTACCAAATAAACCTATCTTATAATTCAAAAAAACAAAACCAAACC			II			GTGTCTCCAATCTCTTTTACTCTGGGAAAGTTACCTTGTTTGAAATTGTAGATTAATTTC[CG]GTTTGGCCCTGTTCCCTTGAACCACAAGACAGGTCCATTTGGTAAGGTATTGGGTACGCT	37	20	1532543	CGGTTTGGCCCTGTTCCCTTGAACCACAAGACAGGTCCATTTGGTAAGGT	20	1480543	F					SIRPD	NM_178460	Body
cg09028132	44768332	ACCRTTTCCCRTATTTAAAAAATTCACACCTATCCCTTTCAAATACTAAC			II			AATTGCTGAAAGCCGTTTCCCGTGTTTGGAGGGTTCACACCTGTCCCTTTCAAATGCTGG[CG]CTTTCACACACTCCTTCTCTCCTGCCAGCACCTTCTGGTCTCAGGAGCATTGCAGGATGT	37	20	37078135	CGCCAGCATTTGAAAGGGACAGGTGTGAACCCTCCAAACACGGGAAACGG	20	36511549	R					SNORA60;SNHG11	NR_002986;NR_003239	Body;Body	chr20:37075227-37075854	S_Shelf
cg10264692	16741331	CTAAACATTATTCCAAAATACRTAACTATATTCTTACAATCCTCACTATC			II			AGCTCCATGGGCGCTTGGCGGGACGGAAGCTGCGGGAATAGTTGATGTTGAGGTTGACGG[CG]ACAGTGAGGACTGCAAGAATACAGTCACGTACCCTGGAACAATGTTCAGGCCAGTGATGA	37	20	61314827	TGAACATTGTTCCAGGGTACGTGACTGTATTCTTGCAGTCCTCACTGTCG	20	60785272	F								chr20:61314627-61314828	Island				20:60785073-60785919
cg14752227	60757476	CRACACATAACCRCCTTCTTACCTTAACTTTCAAAAATCTAATATCCCCC			II			AAAAAAAAAAAAAAAAAAAAAAAAAAAAAAGCCAGAGAAGGAGGCTAAGATAAAAGAATA[CG]GGGGATACCAGACTCCTGAAAGTCAAGGCAAGAAGGCGGTCATGTGCCGATCTGAAGCCT	37	20	34000481	CGGGGGATACCAGACTCCTGAAAGTCAAGGCAAGAAGGCGGTCATGTGCC	20	33463895	F	rs6088829				UQCC;UQCC	NM_018244;NM_199487	TSS1500;TSS1500
cg17011585	25781471	AATAACCTACTAAACACCAAAAAAACTAAAACCAACATACCAAAAAACCC			II			ACCCCGGGCCGAGTGACCTGCTGAGCACCAGGAGGGCTGGGGCCAACATGCCAGGGAACC[CG]GACCTTCCTTCACCTGAAGGTTCTCACCCATGAGGAAGTGGACTTTGCCGTACCATTTCA	37	20	44943004	CGGGTTCCCTGGCATGTTGGCCCCAGCCCTCCTGGTGCTCAGCAGGTCAC	20	44376411	R								chr20:44941342-44941569	S_Shore
cg17697105	54806304	CAAAAACAAATCTCCAAAACAAACCCAACTAATATAACTTAAACAATAAC			II			ACAGAACTGAGCAGGGGCAGGTCTCCAAGGCAAGCCCAGCTGGTGTGACTTAGACAATGA[CG]AGGCTTCAACTCACTGTCTTTTTTTTTTTTTTTTGGAGGGTATTTTTTATTTGTGGGTTC	37	20	5170968	AGGGGCAGGTCTCCAAGGCAAGCCCAGCTGGTGTGACTTAGACAATGACG	20	5118968	R					CDS2	NM_003818	3'UTR
cg19555116	69602361	AACTAAACTCTCAAAATAAACTCACCTACAAAAATCCACCAAAAAAAACC			II			TCCTCACTTTTCTAACAAAACAGGCCCAGGCTTCCACAGGGTCAAGCGGTCTCAAGCCGG[CG]GCTCTCCCTGGTGGATTCCTGCAGGTGAGTTCACTCTGAGAGCTCAGCCAGGGCCAGCAG	37	20	61995604	GCTGAGCTCTCAGAGTGAACTCACCTGCAGGAATCCACCAGGGAGAGCCG	20	61466048	F								chr20:61992186-61993599	S_Shelf
cg21341134	33699418	CACTCTATACCAATTACAACCCCCACAAAAATAACTACTATCTTAACTTC			II			CACACTCTGTGATTCTACTTAAGTAAAGTTTAAAAACAGGCAAATCAAATCTATGGTGTT[CG]AAGTCAAGACAGTAGTTACCCTTGTGGGGGCTGCAACTGGTACAGAGTGTAAGGGGGGAC	37	20	3666877	ACTCTGTACCAGTTGCAGCCCCCACAAGGGTAACTACTGTCTTGACTTCG	20	3614877	F		rs4389384						chr20:3662310-3663187	S_Shelf		RDMR
cg23242649	28601323	AAACAAAAATACAATAATATAATCTTAACTCATAACCACCTCTACATCCC			II			TTCTGTCGCCCAGGCAAGAGTGCAATGGTGTGATCTTGGCTCATGGCCACCTCTGCATCC[CG]GGTTCAAGCGATTCTCCTGCCTCAGCCTCCCAAGTAGCTGGGATTACAGGCATATGCCAC	37	20	34196465	CGGGATGCAGAGGTGGCCATGAGCCAAGATCACACCATTGCACTCTTGCC	20	33659879	R					FER1L4	NR_024377	TSS1500
cg24366087	11664476	AACAAAACTCCAAAATTAAAAAAAATCCCCTAACAAAAAATTAACACCCC			II			TGGCCTCTCCCAGCAAAGCTCCAGGGTTGGAAAGAGTCCCCTGGCAGGGAATTGGCACCC[CG]TCGTGCCCATCCTCTCTCTCTGACTGCCTGCTGGAAATGCCCCCATCTCCCTTTGAGTCC	37	20	55099623	CGGGGTGCCAATTCCCTGCCAGGGGACTCTTTCCAACCCTGGAGCTTTGC	20	54533030	R					C20orf106;GCNT7	NM_001012971;NM_080615	TSS200;5'UTR
cg25397426	37626350	TCCCRATCAAACCCACCTACTCTCCTCCAAAAACATAAACTATTCTAAAC			II			AGCCCCTCAGCGTCTGCCGCCCGCCCTTGGGCCTTTCCGGCCAGCCCCTCCCTCCGCCCA[CG]CCCAGAACAGCCCATGCTCTTGGAGGAGAGCAGGTGGGCTTGACCGGGACTGGCCCCTCA	37	20	56100021	CGCCCAGAACAGCCCATGCTCTTGGAGGAGAGCAGGTGGGCTTGACCGGG	20	55533427	F	rs73625090				CTCFL	NM_080618	5'UTR	chr20:56099970-56100250	Island				20:55533245-55533631
cg26650480	73768497	TTCAACAACCAACCCTACAACCACTAAAATAAATATTTAACAAAACAAAC			II			TGGACAAAACATTCAACAACCAGCCCTACAGCCACTGGGATGGGTATTTAGCAGGGCAAG[CG]TTGGGCACACACAAAGGATGCTTGAAATAGAAAGGCAGAGATCCTCCTTCTCGAGCTTCA	37	20	4796176	CGCTTGCCCTGCTAAATACCCATCCCAGTGGCTGTAGGGCTGGTTGTTGA	20	4744176	R					RASSF2;RASSF2	NM_014737;NM_170774	5'UTR;TSS1500					TRUE
cg08451325	56742400	ATTTCAAAATAAAAAATACCCTTATATTCCACRTTCCAATTCAAAAACCC			II			ACAGAGCTGTTGTTTCAGGATAAAAAATGCCCTTGTATTCCACGTTCCAGTTCAGAGGCC[CG]TCTGTTCCCAAGAGCGGAGGCGTCAGCCGCATGAGTCCCACCGGAAGCCGGGTTGCCGGG	37	21	44720984	CGGGCCTCTGAACTGGAACGTGGAATACAAGGGCATTTTTTATCCTGAAA	21	43545412	R								chr21:44720983-44721212	Island				21:43545235-43545661	21:44720955-44721063	Unclassified_Cell_type_specific
cg01021975	50606488	CAAATTAAAAATTCRAAACAACCAAAATAAACCCTCRAAACCACCTACCC			II			AGCTCAGTGCGCAGGTTGAAGGTTCGGGGCAGCCAGGGTGGGCCCTCGGGGCCACCTGCC[CG]GCGCGCGATGGAGGCCAGGCAGTCCTTGACAGTCAGCAGGTTCTCGCAGGGGAACTGGTT	37	22	43570314	AGGTTGAAGGTTCGGGGCAGCCAGGGTGGGCCCTCGGGGCCACCTGCCCG	22	41900258	R					TTLL12	NM_015140	Body	chr22:43570061-43570322	Island				22:41900019-41900494
cg01441988	72740314	ACAAATAACACATCCCCCTATAAAACTAAAAAAAACTCCAACCCAACTTC			II			AACTTGACGGATGGGAGCCCCCGCCCCCAGCTGTGCAGCCCTTACCCGCTCGTGCATGGG[CG]AAGCTGGGCTGGAGTCCTCTTCAGTCCCACAGGGGGATGTGTCACCTGTAGACACTCGGC	37	22	45598886	CAGGTGACACATCCCCCTGTGGGACTGAAGAGGACTCCAGCCCAGCTTCG	22	43977550	F					C22orf9;C22orf9	NM_001009880;NM_015264	Body;Body	chr22:45598721-45599080	Island				22:43977394-43978425
cg03873518	45753335	RTACCCACCRATAAAATCTAAAAATTTCCCTAAAAAAACAAATTCAAACC			II			CGCCATGCTCCGTGCCCACCGGTAGGGTCTGAGGGTTTCCCTGGAGGGGCAGGTTCAGAC[CG]GAGCCCACCTTGCAGCCTGGGGTGTTCTGACCGCCCCTCTCAGTGCTCCAGGAGCTCTTC	37	22	47026467	TGCCCACCGGTAGGGTCTGAGGGTTTCCCTGGAGGGGCAGGTTCAGACCG	22	45405131	R		rs732925			GRAMD4	NM_015124	Body	chr22:47027366-47027910	N_Shore				22:45405025-45405623
cg09322432	21629479	TAAACTAAAAACAACCTCTAAACAAAAATAATCCCATCCAAAAAACCTCC			II			CACACACCAGTCACACACACATACAGACCCGGCACCAAGTACCCCACTTCCCAGCCATGC[CG]GAGGTTTCCTGGATGGGACCACTCCTGTCCAGAGGCTGCTCCCAGCCCAGCCCACATTCC	37	22	42527611	GGGCTGGGAGCAGCCTCTGGACAGGAGTGGTCCCATCCAGGAAACCTCCG	22	40857555	F					CYP2D6;CYP2D6	NM_001025161;NM_000106	TSS1500;TSS1500	chr22:42524731-42525908	S_Shore
cg14543179	65727426	TCACTCATAAACAACATCCAATCCAAAAAACCCCATTTTCTTAAACCCTC			II			CTCAGTAACAAAGTGTTACAAAGGACACATAGGATTTGGGCTTGCATTAGGTGATTTGGA[CG]AGGGCTTAAGAAAATGGGGTTTTCTGGATTGGATGCTGCCTATGAGTGAGTACCTTGATA	37	22	31553928	CGAGGGCTTAAGAAAATGGGGTTTTCTGGATTGGATGCTGCCTATGAGTG	22	29883928	F								chr22:31556124-31556466	N_Shelf
cg22042992	45645327	TACACAACATCRCTAATAATAACACCRTACAAAACATCACCAATAAAAAC			II			GTCGTGTACAGCGTCCACGATAGCGTGCCTTGTCGGTATCATTAGCAATGTCGTATAAAG[CG]CCCTCATTGGTGATGTCTTGTACGGTGCCATCATTAGCGATGTTGTGTACAGTGTCCTTG	37	22	20640123	CGCCCTCATTGGTGATGTCTTGTACGGTGCCATCATTAGCGATGTTGTGT	22	18970123	F								chr22:20639716-20640981	Island				22:18969750-18970954
cg23066564	12614384	AAATCAAACTCCCAAAAAATAAAACCAAAAATTCCCTTACAAACACTAAC			II			TTCCGGCAAAACCCCAGAAGGAATCCACAGGAGGTGGGGACCGGGAAGGCAGCCGGGTTG[CG]CCAGTGCCTGCAAGGGAACCTCTGGCCCCATTTCCTGGGAGCCTGACCCCGCCCTAGGAT	37	22	46481734	CGCCAGTGCCTGCAAGGGAACCTCTGGCCCCATTTCCTGGGAGCCTGACC	22	44860398	F		rs77409217			LOC400931	NR_027033	TSS200	chr22:46481815-46482024	N_Shore							TRUE
Age			age_group
20	16.3373		9-24	18.3767
21	16.6366		25-28	16.0306
22	15.7371		29-32	19.0373
24	19.2574		33-36	18.956
25	16.2631		37-40	18.592
26	12.4296		41-44	20.0721
27	14.4233		45-48	19.7597
28	14.8876		49-52	19.7044
29	14.6853		53-54	20.3641
30	15.8587		55-56	20.868
31	19.6178		57-60	20.8993
32	14.6322		61-64	22.128
33	19.1527		65-68	21.2162
34	17.8726		69-72	23.0819
35	20.5454		73-76	21.3059
36	15.431		77-80	20.8129
37	18.1988		>80	21.3348
38	18.3018
39	16.3834
40	18.4763
41	17.9572
42	20.9093
43	19.3048
44	19.3042
45	16.358
46	19.5879
47	21.7507
48	19.6158
49	20.3346
50	18.2776
51	17.9281
52	20.1289
53	19.4082
54	20.757
55	20.4282
56	21.0875
57	21.2956
58	20.8232
59	20.0454
60	20.0456
61	17.0321
62	20.2565
63	23.1328
64	24.3353
65	21.731
66	20.744
67	19.6742
68	20.9777
69	22.4909
70	21.2323
71	18.6279
72	19.2856
73	17.7132
74	19.9344
75	16.811
76	22.4755
77	17.804
78	21.2579
79	20.3815
80	19.429
81	20.3786
82	22.0206
83	15.8374
84	18.2296
86	19.427
87	14.0153
89	14.8665

## Sheet: 460 Cyt beta value
cg05639522	cg06649280	cg07367222	cg08137948	cg13446070	cg23603891	cg26837773	cg09606941	cg10859133	cg17942639	cg22860848	cg03637769	cg08929133	cg16239482	cg05322332	cg17082366	cg24385450	cg24979233	cg25186874	cg02084828	cg22132026	cg24756698	cg00346623	cg00512454	cg00694180	cg05068156	cg05699123	cg16739976	cg25412448	cg26570901	cg00830401	cg09424415	cg10592734	cg14391382	cg15340709	cg26651148	cg01614020	cg03899054	cg21193975	cg12338214	cg24749860	cg04085571	cg09575189	cg14433983	cg25201101	cg17878139	cg19001789	cg24852565	cg00716025	cg18729681
0.484404	0.388337	0.920565	0.254334	0.869727	0.0937308	0.428024	0.0141111	0.216348	0.00826582	0.832586	0.951073	0.961888	0.0707041	0.741999	0.560059	0.956291	0.972279	0.879274	0.925662	0.886844	0.797353	0.89247	0.836346	0.836604	0.897333	0.699402	0.911059	0.9063	0.154512	0.83534	0.215883	0.855818	0.853659	0.893926	0.876053	0.0141998	0.64913	0.936534	0.848528	0.963895	0.660989	0.921827	0.898689	0.805341	0.757847	0.342047	0.859861	0.881065	0.920012
0.434759	0.513451	0.940798	0.275639	0.850771	0.144119	0.616111	0.0150176	0.213652	0.0125018	0.886014	0.944908	0.95737	0.0569971	0.646744	0.392848	0.952325	0.978331	0.917533	0.955119	0.941585	0.802606	0.912733	0.872474	0.867377	0.892282	0.666935	0.917533	0.886396	0.284811	0.809273	0.245088	0.850544	0.922093	0.909556	0.921406	0.00875697	0.628938	0.954637	0.84278	0.973955	0.693473	0.90012	0.798374	0.780526	0.795402	0.271852	0.901766	0.925042	0.925501
0.558335	0.453735	0.939185	0.204672	0.893114	0.129196	0.650037	0.0109265	0.203519	0.0208757	0.896615	0.945524	0.950673	0.0576825	0.739623	0.568997	0.958452	0.968171	0.872336	0.922966	0.896653	0.886665	0.807145	0.894541	0.875707	0.923248	0.686724	0.911774	0.912412	0.199843	0.80945	0.297329	0.847688	0.962211	0.918502	0.917963	0.0199355	0.742319	0.900343	0.832633	0.952659	0.677697	0.906708	0.920579	0.848198	0.839098	0.429557	0.758355	0.85418	0.897206
0.505343	0.540826	0.942468	0.413155	0.863136	0.119017	0.499014	0.020892	0.193755	0.0133201	0.869267	0.939078	0.950217	0.0509409	0.737693	0.604006	0.971916	0.982794	0.886469	0.907692	0.893795	0.831531	0.882979	0.815394	0.832292	0.86898	0.664047	0.895812	0.881312	0.200639	0.817513	0.29884	0.858438	0.860971	0.865953	0.839677	0.018447	0.652076	0.906014	0.866128	0.944712	0.665606	0.891103	0.908266	0.69272	0.79093	0.430914	0.909939	0.866121	0.900415
0.478293	0.50094	0.913228	0.18193	0.863424	0.131129	0.446378	0.0298896	0.273293	0.0178025	0.734167	0.95351	0.913143	0.0557368	0.644132	0.581698	0.955331	0.893633	0.884093	0.87329	0.886105	0.812055	0.850732	0.822213	0.856175	0.894081	0.700989	0.912627	0.861572	0.379117	0.734391	0.278839	0.779892	1	0.838403	0.876498	0.0333644	0.597879	0.851385	0.758039	0.938633	0.529898	0.862247	0.864564	0.788517	0.72485	0.51736	0.911656	0.879279	0.943067
0.570349	0.513015	0.925266	0.211401	0.874513	0.129825	0.454957	0.0176561	0.20195	0.0211926	0.866189	0.95361	0.960286	0.0561416	0.624954	0.483239	0.967686	0.981492	0.936532	0.936607	0.9119	0.831609	0.904156	0.855683	0.856546	0.918668	0.719975	0.909015	0.936029	0.12008	0.835876	0.304525	0.885825	0.890752	0.865236	0.917123	0.0202439	0.714514	0.977499	0.881178	0.950149	0.726382	0.926876	0.920756	0.816985	0.771756	0.426093	0.868285	0.887718	0.954233
0.486452	0.431685	0.921479	0.204964	0.915438	0.143529	0.508143	0.011524	0.20022	0.0073669	0.85662	0.952993	0.940141	0.0591478	0.7676	0.648392	0.966779	0.968357	0.947074	0.909512	0.914899	0.801374	0.934584	0.876361	0.858359	0.883184	0.729336	0.907145	0.88729	0.273697	0.816817	0.30069	0.812261	0.905626	0.858713	0.875718	0.0197318	0.59203	0.890045	0.805439	0.946686	0.68839	0.911927	0.850674	0.794899	0.769997	0.377208	0.900326	0.867017	0.926374
0.55617	0.424759	0.908946	0.2323	0.858559	0.127918	0.430541	0.0108667	0.215859	0.0106713	0.810377	0.956549	0.930017	0.0700483	0.707908	0.648798	0.966655	0.962939	0.894936	0.947239	0.818812	0.826632	0.880822	0.868297	0.856902	0.909209	0.745557	0.911749	0.852295	0.354763	0.798348	0.238326	0.853709	0.964372	0.893258	0.896852	0.0609397	0.575693	0.90257	0.822005	0.975407	0.619006	0.877873	0.916847	0.70868	0.796341	0.365716	0.914621	0.821872	1
0.461791	0.461596	0.936314	0.224843	0.855365	0.184567	0.503471	0.0118567	0.185999	0.00807241	0.888836	0.966613	0.957423	0.0485454	0.707647	0.641835	0.976927	0.968441	1	0.952731	0.894137	0.802347	0.993966	0.875932	0.872754	0.935773	0.753118	0.939343	0.890627	0.224285	0.811661	0.284938	0.828916	0.928466	0.915171	0.894707	0.034306	0.710653	0.897563	0.847775	0.951704	0.690584	0.911944	0.908133	0.770933	0.795197	0.315065	0.90215	0.897207	1
0.504683	0.500417	0.930051	0.358153	0.851611	0.187855	0.446631	0.0354716	0.221432	0.0642565	0.795871	0.956065	0.934342	0.089172	0.665357	0.656569	0.9666	0.955141	0.880489	0.952724	0.911134	0.782303	0.968966	0.831548	0.801254	0.883199	0.700353	0.930262	0.872543	0.166716	0.829555	0.331271	0.802475	0.873945	0.920228	0.914399	0.0279401	0.572002	0.897323	0.854497	0.943179	0.644584	0.86777	0.895316	0.740704	0.718991	0.31388	0.912509	0.887763	0.978074
0.563751	0.482913	0.936711	0.228271	0.850202	0.148908	0.618839	0.0272888	0.240403	0.00806909	0.879689	0.933151	0.95645	0.020122	0.768684	0.597215	0.979719	0.968788	0.933916	0.933173	0.880618	0.829496	0.921969	0.880539	0.820251	0.888125	0.69169	0.917885	0.87829	0.195868	0.838996	0.325174	0.846877	0.915188	0.885504	0.89407	0.0473121	0.734815	0.959658	0.853273	0.971389	0.72689	0.894896	0.840926	0.827109	0.805722	0.307258	0.862635	0.851787	0.946573
0.524535	0.469697	0.874532	0.258995	0.868395	0.156924	0.498958	0.0764096	0.216638	0.0275673	0.856036	0.952501	0.943391	0.0527228	0.671973	0.502768	0.964247	0.957998	0.941731	0.928929	0.898424	0.726364	0.889778	0.824484	0.787708	0.89744	0.658108	0.898843	0.891226	0.357021	0.820709	0.248773	0.88298	0.887405	0.883516	0.897275	0.0117833	0.607555	0.926921	0.828976	0.958748	0.66336	0.856344	0.84894	0.828806	0.7873	0.24156	0.866884	0.812172	0.873793
0.528563	0.484379	0.941211	0.228516	0.838826	0.122968	0.44336	0.0359039	0.218044	0.0432104	0.830487	0.941777	0.952899	0.0544776	0.692346	0.621722	0.961888	0.952554	0.882447	0.912456	0.801471	0.795002	0.942352	0.822125	0.789879	0.867158	0.695345	0.863481	0.879418	0.179998	0.842036	0.292517	0.83893	0.848107	0.875321	0.938703	0.0124703	0.513675	0.929434	0.820186	0.955999	0.703662	0.874006	0.830326	0.732465	0.784162	0.425194	0.823014	0.797806	0.893726
0.501323	0.546534	0.915252	0.221886	0.865153	0.147106	0.478133	0.0297697	0.251487	0.0165475	0.857628	0.934056	0.951282	0.0692196	0.681433	0.515821	0.946158	0.95996	0.958412	0.897186	0.830474	0.808785	0.922217	0.829657	0.776823	0.912758	0.690583	0.89408	0.882238	0.176595	0.793452	0.342105	0.89244	0.915436	0.870508	0.868336	0.07556	0.669413	0.887178	0.850543	0.935289	0.702385	0.850748	0.897796	0.700763	0.748938	0.325905	0.871144	0.830692	0.912156
0.572684	0.671912	0.937526	0.338743	0.834768	0.246681	0.479277	0.0612933	0.242769	0.0155578	0.844041	0.957692	0.91409	0.120863	0.690594	0.537841	0.912657	0.96912	0.866537	0.855857	0.884822	0.794278	0.872508	0.859719	0.820035	0.853288	0.713733	0.917725	0.878284	0.293971	0.794214	0.312855	0.862994	0.861791	0.797386	0.862946	0.0898867	0.57456	0.875746	0.79338	0.923607	0.599631	0.847215	0.856974	0.705129	0.762108	0.56775	0.875727	0.839354	0.936689
0.510285	0.443174	0.903259	0.248986	0.859193	0.138028	0.492815	0.0313287	0.209594	0.0144619	0.898167	0.920042	0.937721	0.0607211	0.706716	0.528421	0.950494	0.965561	0.880229	0.916023	0.893721	0.8246	0.878709	0.850546	0.839521	0.904213	0.692793	0.891113	0.890236	0.252166	0.796027	0.329493	0.864003	0.810831	0.799729	0.906799	0.0272487	0.608483	0.959082	0.824942	0.961557	0.750403	0.883511	0.852275	0.751753	0.742406	0.303872	0.817268	0.84385	0.881044
0.510224	0.534761	0.950858	0.275771	0.88698	0.118432	0.503665	0.0209869	0.219462	0.0164444	0.859164	0.942674	0.935605	0.0684686	0.74867	0.520924	0.957622	0.976223	0.916056	0.909479	0.880506	0.818993	0.922098	0.855924	0.868078	0.921113	0.721781	0.901032	0.918679	0.218249	0.843565	0.34077	0.869693	0.784297	0.814815	0.925081	0.00973032	0.693538	0.864659	0.827402	0.935052	0.767726	0.912392	0.904018	0.811175	0.775953	0.367171	0.908465	0.827944	0.900628
0.495592	0.480898	0.941146	0.270229	0.9028	0.12503	0.426203	0.0149317	0.251387	0.0145952	0.892215	0.968409	0.957644	0.0495555	0.713248	0.60147	0.962977	0.966677	0.868178	0.973848	0.941165	0.807037	0.940024	0.881368	0.855801	0.895654	0.722941	0.93386	0.899428	0.179854	0.855292	0.271711	0.857537	0.705156	0.863555	0.897858	0.0183405	0.619529	0.870932	0.866455	0.95262	0.782914	0.911816	0.770595	0.805449	0.779737	0.269672	0.932394	0.850369	0.905577
0.363728	0.48011	0.922721	0.119221	0.856372	0.128304	0.602248	0.0131668	0.225383	0.0183911	0.91908	0.934168	0.967542	0.0411718	0.701968	0.585199	0.963836	0.975352	0.914712	0.907797	0.898767	0.837207	0.888998	0.856146	0.83508	0.924187	0.714449	0.903932	0.863421	0.489294	0.795332	0.263525	0.896483	0.884571	0.843234	0.903258	0.0247221	0.321273	0.926166	0.866949	0.933881	0.691931	0.917637	0.936019	0.785327	0.799833	0.12349	0.917425	0.804585	0.825704
0.410622	0.446953	0.953859	0.163851	0.858798	0.162957	0.509369	0.0159228	0.181203	0.00620006	0.883247	0.933371	0.980029	0.0578691	0.673757	0.459094	0.962639	0.969481	0.922179	0.941425	0.84129	0.826579	0.982366	0.872896	0.822159	0.941939	0.682155	0.921704	0.863719	0.155107	0.846579	0.243136	0.865514	0.864691	0.873841	0.898268	0.0260556	0.60658	0.905093	0.834119	0.942356	0.652215	0.897066	0.922435	0.731155	0.794458	0.324416	0.75898	0.825914	0.909483
0.407407	0.481982	0.938035	0.202227	0.88376	0.231461	0.370553	0.0999265	0.217949	0.00808667	0.774041	0.957552	0.942925	0.147801	0.68257	0.541771	0.921364	0.957756	0.910383	0.909434	0.900518	0.876221	0.921219	0.858222	0.84043	0.882169	0.723676	0.922874	0.896132	0.0487156	0.816413	0.289722	0.843636	0.887646	0.912688	0.947957	0.0267729	0.592635	0.942438	0.852472	0.960326	0.683667	0.876251	0.872323	0.684536	0.778288	0.272095	0.802287	0.68253	0.901075
0.47468	0.519139	0.905745	0.223124	0.84011	0.151998	0.490444	0.034316	0.238369	0.0112488	0.861729	0.94656	0.943313	0.0648839	0.657919	0.391982	0.9313	0.966389	0.87988	0.941987	0.876995	0.796578	0.959507	0.831057	0.792	0.878229	0.708029	0.926237	0.877415	0.402378	0.811804	0.336014	0.834675	0.827298	0.9126	0.863466	0.018876	0.630602	0.904293	0.834922	0.931212	0.678345	0.898008	0.883021	0.676609	0.743772	0.373708	0.827483	0.86352	0.970238
0.516223	0.420446	0.941677	0.16011	0.914498	0.105505	0.439603	0.0205577	0.193745	0.0198513	0.884414	0.952758	0.933167	0.0289359	0.707351	0.308129	0.968658	0.979208	0.925858	0.939891	0.940294	0.816379	0.938091	0.883686	0.844288	0.91418	0.744664	0.950324	0.932032	0.124758	0.858739	0.276372	0.931733	0.910199	0.971389	0.888852	0.0116709	0.635512	0.872297	0.889154	0.953082	0.692064	0.919377	0.917969	0.863529	0.713083	0.393689	0.891558	0.85697	0.968637
0.507291	0.611528	0.93207	0.248886	0.886176	0.166971	0.443892	0.0598879	0.223398	0.0487584	0.860589	0.949037	0.921844	0.110909	0.692719	0.40846	0.956585	0.923463	0.941119	0.919933	0.84409	0.772392	0.903962	0.8	0.851716	0.878767	0.727677	0.908822	0.82012	0.374895	0.826587	0.327041	0.848068	0.907532	0.96337	0.898068	0.0337402	0.633283	0.862633	0.842508	0.960643	0.678799	0.881488	0.904235	0.800334	0.782913	0.512591	0.788491	0.814606	0.873251
0.437954	0.453883	0.948304	0.395282	0.887049	0.115551	0.419258	0.0175995	0.210674	0.0121929	0.904087	0.970019	0.974934	0.0773271	0.820959	0.44435	0.961477	0.981734	0.880476	0.870092	0.914825	0.815926	0.944302	0.908206	0.882384	0.910351	0.678708	0.903263	0.9214	0.0864928	0.843832	0.314948	0.891617	1	0.792889	0.937544	0.0180938	0.655311	0.898985	0.903685	0.995299	0.802453	0.919018	0.930967	0.877127	0.808924	0.212401	0.911937	0.83557	0.815085
0.570902	0.438156	0.93011	0.323926	0.819545	0.207703	0.563325	0.095071	0.263749	0.0786542	0.774967	0.952665	0.903378	0.173049	0.623791	0.710854	0.959822	0.931615	0.925035	0.930116	0.886614	0.791475	0.939693	0.878034	0.797936	0.862033	0.661727	0.910971	0.857632	0.160636	0.824951	0.246042	0.837472	0.893506	0.885125	0.904858	0.0945722	0.646307	0.867948	0.822891	0.944961	0.681586	0.815994	0.846624	0.668524	0.774401	0.291321	0.932097	0.873524	0.989414
0.495742	0.455116	0.929995	0.234002	0.872665	0.12508	0.483043	0.0130953	0.185646	0.0164236	0.844468	0.504065	0.945891	0.0884901	0.705937	0.571501	0.93764	0.981187	0.852329	0.868421	0.839171	0.776872	0.849663	0.824827	0.830527	0.890306	0.727959	0.924597	0.849307	0.239814	0.802977	0.293089	0.833435	0.853208	0.833075	0.884796	0.0175039	0.658898	0.853279	0.870156	0.981365	0.697741	0.884607	0.791415	0.840855	0.704594	0.467995	0.840635	0.844914	0.992123
0.68867	0.481449	0.924724	0.308278	0.846812	0.13079	0.542285	0.0252109	0.274005	0.0136986	0.797529	0.950858	0.926184	0.108377	0.649324	0.688085	0.943548	0.960363	0.857001	0.918423	0.934502	0.770057	0.838281	0.833045	0.784771	0.870094	0.706658	0.903519	0.864195	0.285524	0.833702	0.293308	0.843221	0.78681	0.823814	0.898799	0.0393434	0.648941	0.904544	0.805133	0.947444	0.607448	0.827439	0.815416	0.632074	0.790892	0.302541	0.841989	0.853723	0.945645
0.513566	0.445065	0.950831	0.190339	0.835642	0.120329	0.438965	0.026309	0.218837	0.015342	0.853222	0.960806	0.956821	0.0874341	0.706052	0.406727	0.949208	0.966652	0.904433	0.906028	0.927651	0.808096	0.963026	0.855743	0.84053	0.913595	0.709534	0.934391	0.905823	0.191399	0.847664	0.301803	0.844124	0.919504	0.877578	0.914708	0.0317541	0.53689	0.897517	0.869904	0.951482	0.690759	0.907683	0.920028	0.735667	0.736908	0.260408	0.722438	0.837475	0.911024
0.557434	0.544933	0.92986	0.423988	0.875792	0.186164	0.370087	0.0463038	0.244911	0.0071845	0.863694	0.930307	0.938389	0.0812668	0.756015	0.358303	0.956922	0.956712	0.933224	0.933835	0.866929	0.827505	0.947287	0.81185	0.810557	0.922127	0.657923	0.889096	0.880375	0.32307	0.825081	0.30818	0.799394	0.842614	0.930907	0.903966	0.0563942	0.567763	0.958674	0.857914	0.961776	0.681191	0.884007	0.828419	0.736675	0.704345	0.322157	0.976024	0.860423	0.849103
0.433141	0.452496	0.915053	0.278821	0.813177	0.117466	0.510579	0.00970089	0.194948	0.011828	0.870266	0.938957	0.954746	0.0417535	0.718986	0.557633	0.920558	0.961462	0.860192	0.901394	0.893935	0.834807	0.790081	0.85427	0.800585	0.907203	0.672803	0.906916	0.878916	0.270842	0.814838	0.264443	0.860274	0.812233	0.951669	0.91007	0.0244355	0.63783	0.918841	0.849126	0.937788	0.605507	0.889795	0.895234	0.796267	0.737503	0.393556	0.746593	0.799562	0.94727
0.55725	0.450733	0.937732	0.255248	0.834388	0.130027	0.481207	0.0145981	0.196384	0.0142218	0.904542	0.961664	0.964765	0.0643773	0.764061	0.534087	0.965846	0.982708	0.875793	0.922776	0.84544	0.844831	0.904145	0.81442	0.841991	0.913018	0.723892	0.905555	0.910664	0.144043	0.859235	0.285164	0.862823	0.892922	0.909896	0.903437	0.0600573	0.593893	0.922851	0.858669	0.962673	0.702265	0.891629	0.907319	0.808902	0.761609	0.284945	0.856472	0.853809	0.892386
0.442766	0.420399	0.924054	0.26199	0.843466	0.13524	0.504629	0.0186635	0.171962	0.000440917	0.867216	0.911744	0.965978	0.0298568	0.765777	0.572515	0.976726	0.973659	0.926061	0.944261	0.930793	0.804822	0.948052	0.858399	0.850975	0.94244	0.689791	0.899198	0.884739	0.304023	0.820807	0.315303	0.859752	0.721547	0.849347	0.936447	0.00858773	0.693116	0.984333	0.865515	0.96593	0.713483	0.909278	0.878375	0.821405	0.773343	0.209123	0.848012	0.81768	0.943992
0.52488	0.552197	0.931424	0.215611	0.84999	0.147355	0.476053	0.0351186	0.269404	0.00860639	0.849666	0.95868	0.946842	0.136862	0.658148	0.588035	0.952398	0.964553	0.845577	0.956532	0.900236	0.835497	0.883747	0.839054	0.854053	0.908139	0.70778	0.853588	0.856606	0.334295	0.83081	0.311846	0.861991	0.906351	0.856274	0.915833	0.0112269	0.680931	0.852528	0.834	0.965525	0.688168	0.879056	0.881556	0.768472	0.727273	0.423425	0.87904	0.864844	0.924812
0.52611	0.47559	0.936916	0.275859	0.905821	0.140215	0.561118	0.0173158	0.227564	0.011002	0.859164	0.94881	0.959821	0.0597908	0.700613	0.603939	0.961797	0.975921	0.96084	0.914458	0.891118	0.777805	0.970526	0.845595	0.839033	0.893559	0.714452	0.915789	0.876112	0.194069	0.825781	0.326494	0.809589	0.883253	0.848786	0.901531	0.030514	0.614097	0.859058	0.857718	0.944183	0.654037	0.886139	0.894389	0.790317	0.779317	0.446317	0.893886	0.841249	0.931316
0.510637	0.436388	0.944639	0.36967	0.885012	0.151087	0.56215	0.0500855	0.233352	0.0202262	0.918346	0.961175	0.97848	0.0512413	0.71831	0.465929	0.953123	0.975564	0.870265	0.939985	0.903203	0.869326	0.927306	0.875374	0.862468	0.931032	0.738018	0.928651	0.879942	0.301597	0.851968	0.297719	0.890628	0.87291	0.928412	0.925155	0.0635278	0.702703	0.947644	0.895259	0.975716	0.753422	0.91646	0.910198	0.777235	0.836418	0.295357	0.837063	0.862183	0.925539
0.496554	0.525958	0.968369	0.281963	0.881757	0.10974	0.503864	0.0480369	0.220405	0.0294514	0.918169	0.945599	0.973938	0.0465684	0.737494	0.692173	0.984169	0.977908	0.871378	0.873956	0.902929	0.823001	0.826493	0.880896	0.841712	0.88809	0.743647	0.926836	0.863061	0.356727	0.848255	0.25072	0.784049	0.936836	0.797573	0.85728	0.0133555	0.754678	0.915856	0.859846	0.944763	0.744618	0.910344	0.878829	0.792876	0.769672	0.401278	0.907719	0.849613	0.888716
0.558872	0.453109	0.920477	0.273606	0.86974	0.161852	0.451329	0.0160311	0.210607	0.0127803	0.884886	0.934368	0.942302	0.0475583	0.67833	0.549493	0.967125	0.952883	0.820283	0.88164	0.870004	0.830528	0.936144	0.801346	0.8094	0.914632	0.691628	0.910184	0.902916	0.342927	0.819133	0.241431	0.820986	0.846337	0.813218	0.911326	0.0107886	0.621592	0.95844	0.888724	0.977743	0.636563	0.911055	0.924358	0.842113	0.802389	0.435361	0.840188	0.766561	0.85617
0.498795	0.516796	0.962407	0.188231	0.854575	0.125966	0.50405	0.0122072	0.200411	0	0.895823	0.950382	0.957918	0.061615	0.783803	0.653141	0.97786	0.971135	0.922161	0.905317	0.940464	0.811626	0.969591	0.866155	0.853933	0.929607	0.710901	0.911314	0.88557	0.238745	0.863888	0.309883	0.889348	0.819433	0.910767	0.925607	0.0270596	0.575315	0.917504	0.855478	0.961102	0.638386	0.908717	0.901593	0.753558	0.728516	0.303896	0.821934	0.86152	0.918033
0.459987	0.511738	0.954908	0.431571	0.849493	0.135853	0.493609	0.00584831	0.232446	0.0020763	0.909801	0.41302	0.970166	0.0449749	0.771467	0.662551	0.958165	0.97967	0.934312	0.930237	0.897144	0.852599	0.860529	0.892893	0.835026	0.919989	0.711219	0.931282	0.907557	0.334618	0.8364	0.332578	0.876896	0.94403	0.887916	0.92379	0.0264329	0.676396	0.904062	0.835656	0.966158	0.731046	0.914687	0.894907	0.775773	0.709051	0.385803	0.878965	0.864078	0.901793
0.451909	0.466728	0.929496	0.199105	0.891483	0.267451	0.385721	0.0356908	0.236767	0.045205	0.804923	0.965699	0.924254	0.0710615	0.664989	0.529218	0.939302	0.936905	0.876138	0.948805	0.893257	0.80563	0.962963	0.835204	0.804489	0.89977	0.701756	0.920028	0.858542	0.330955	0.837209	0.318812	0.789357	0.854123	0.859843	0.894301	0.0281698	0.541281	0.893401	0.849984	0.972941	0.651962	0.87295	0.854376	0.665087	0.714565	0.362012	0.887883	0.859994	0.915818
0.489578	0.383151	0.934362	0.3136	0.875625	0.164182	0.616279	0.0173271	0.217545	0.00916223	0.871617	0.924082	0.942941	0.0840216	0.709726	0.535515	0.922523	0.954246	0.937213	0.858352	0.903823	0.835874	0.864297	0.833825	0.872553	0.927352	0.700303	0.914039	0.883711	0.0990904	0.849519	0.303709	0.732354	0.96868	0.88062	0.923227	0.0170963	0.603234	0.866382	0.850402	0.909137	0.632685	0.915315	0.773051	0.819424	0.600493	0.246051	0.919803	0.87234	0.925173
0.498145	0.374704	0.875074	0.130192	0.845941	0.125088	0.547677	0.018699	0.233847	0.0142282	0.827518	0.940382	0.934422	0.0989105	0.752246	0.587193	0.946289	0.977011	0.914731	0.922535	0.879045	0.74938	0.920992	0.794146	0.867115	0.876913	0.747727	0.908277	0.883714	0.272133	0.821176	0.319311	0.850394	0.967658	0.817673	0.829863	0.0136136	0.791416	0.89725	0.791779	0.95686	0.692177	0.890545	0.908925	0.778857	0.586755	0.28531	0.813953	0.919529	0.968962
0.5027	0.395456	0.935637	0.158884	0.872167	0.138095	0.428984	0.0110384	0.226669	0.0472146	0.902462	0.926148	0.947301	0.0677298	0.677559	0.542216	0.952216	0.953927	0.927956	0.933437	0.877067	0.790474	0.858331	0.840481	0.827905	0.891417	0.701296	0.906926	0.860474	0.235772	0.83425	0.277308	0.885272	0.847042	0.845623	0.926251	0.00982187	0.692504	0.89749	0.869377	0.929681	0.713888	0.888165	0.762821	0.84116	0.75873	0.379751	0.865554	0.857552	0.937202
0.456906	0.522885	0.935453	0.268968	0.809364	0.113373	0.417759	0.0627535	0.231099	0.0758514	0.783232	0.94894	0.933085	0.0948564	0.748942	0.536594	0.950869	0.95156	0.922902	0.934569	0.863266	0.793414	0.935729	0.822181	0.828625	0.882063	0.695535	0.902331	0.873733	0.308888	0.837695	0.276499	0.826714	0.888889	0.976429	0.798877	0.0340985	0.653846	0.922596	0.841569	0.968591	0.598165	0.85876	0.857331	0.62968	0.707356	0.281966	0.755314	0.855787	0.947764
0.68427	0.382069	0.922787	0.171998	0.869703	0.145299	0.619883	0.0301117	0.255946	0.0168468	0.879015	0.964253	0.942668	0.115293	0.686427	0.534699	0.952962	0.963821	0.909487	0.897123	0.944519	0.808246	0.855339	0.835193	0.841437	0.890278	0.70778	0.919242	0.92018	0.138083	0.787207	0.291194	0.826248	0.789793	0.885222	0.961214	0.0184489	0.589305	0.86164	0.852133	0.968259	0.708312	0.903586	0.833528	0.845383	0.843385	0.246755	0.936213	0.721944	1
0.536462	0.42561	0.9203	0.251384	0.809865	0.121002	0.476924	0.0423335	0.239113	0.046951	0.789222	0.952293	0.916827	0.0770618	0.62099	0.534298	0.94728	0.939095	0.918101	0.960577	0.89979	0.733498	0.888226	0.773648	0.748487	0.849467	0.674629	0.802697	0.819553	0.174067	0.813267	0.317824	0.793555	0.84544	0.919603	0.884899	0.0571253	0.675711	0.901034	0.849236	0.97379	0.607296	0.83613	0.771067	0.704763	0.750417	0.233773	0.862066	0.807547	0.863754
0.52311	0.506203	0.935853	0.237085	0.853196	0.122353	0.385588	0.0744144	0.2337	0.0588293	0.794874	0.962535	0.915178	0.0499201	0.723152	0.487911	0.95482	0.938245	0.872866	0.907359	0.923763	0.801181	0.883297	0.782373	0.836805	0.875822	0.649555	0.914678	0.862173	0.256255	0.869811	0.304138	0.838306	0.91445	0.787662	0.909096	0.0687944	0.610452	0.93161	0.855761	0.962881	0.651939	0.906987	0.881044	0.680516	0.753376	0.398684	0.864795	0.814651	0.843812
0.361157	0.616487	0.932759	0.182401	0.821002	0.155873	0.406141	0.0116052	0.23423	0.0151481	0.898035	0.950509	0.954757	0.0508869	0.762357	0.532589	0.933472	0.980887	0.940026	0.924672	0.892371	0.793022	0.932246	0.866768	0.821214	0.92293	0.661081	0.92234	0.899643	0.0508688	0.835981	0.229284	0.901235	0.867971	0.904497	0.939766	0.0129436	0.81199	0.931101	0.861075	0.946246	0.769529	0.924492	0.874983	0.704149	0.659182	0.23861	0.803893	0.837545	0.975076
0.502538	0.507555	0.906353	0.427081	0.830844	0.187524	0.414343	0.0522585	0.251897	0.0544946	0.802494	0.956257	0.927804	0.0840815	0.712103	0.620593	0.953019	0.941848	0.914649	0.924223	0.880232	0.769302	0.92993	0.793959	0.81866	0.864217	0.675325	0.925547	0.842519	0.278474	0.845442	0.328156	0.809306	0.959023	0.897548	0.903934	0.0915467	0.592093	0.940203	0.826336	0.929119	0.692578	0.867057	0.874516	0.703255	0.793427	0.396635	0.861684	0.844065	0.871824
0.452868	0.307186	0.950285	0.302066	0.861198	0.18079	0.483451	0.0172353	0.226051	0.0175904	0.848351	0.96535	0.953495	0.0822675	0.670128	0.573892	0.944312	0.973053	0.869955	0.905166	0.824267	0.769621	0.851152	0.850636	0.843798	0.930346	0.671713	0.92017	0.84917	0.107176	0.872169	0.249018	0.864758	0.682432	0.771379	0.828411	0.0448368	0.64247	0.892924	0.84439	0.920536	0.664198	0.899656	0.956805	0.733854	0.842256	0.372381	0.735099	0.818122	0.847285
0.408484	0.366048	0.92324	0.284931	0.876606	0.0967184	0.511135	0.0196774	0.267554	0.0160445	0.882211	0.964406	0.962579	0.0340497	0.611982	0.622203	0.95553	0.961939	0.895241	0.938931	0.811582	0.85691	0.904685	0.82891	0.870022	0.903579	0.708624	0.901822	0.887655	0.109357	0.858059	0.244047	0.862077	0.905413	0.839542	0.868759	0.0137499	0.69989	0.862883	0.914023	0.94104	0.632877	0.876158	0.790781	0.747888	0.757672	0.501929	0.641764	0.848443	0.818083
0.48605	0.329772	0.934898	0.145066	0.863249	0.170796	0.457737	0.0320989	0.260469	0.0135673	0.779904	0.941068	0.922209	0.07094	0.649164	0.575714	0.937837	0.922406	0.867193	0.916897	0.84371	0.811995	0.816966	0.830621	0.755831	0.860812	0.70988	0.889611	0.835233	0.302944	0.847332	0.257009	0.76041	0.770174	0.863171	0.898101	0.0104325	0.536503	0.870737	0.851595	0.971608	0.625516	0.863303	0.839252	0.805107	0.716066	0.364041	0.836695	0.790448	0.889517
0.389725	0.366368	0.925105	0.272468	0.903899	0.122888	0.664335	0.0232866	0.215856	0.0147976	0.871623	0.955571	0.944844	0.0578035	0.627033	0.602424	0.955328	0.951004	0.923856	0.917683	0.860617	0.778647	0.730566	0.845667	0.825499	0.865588	0.70249	0.90414	0.873374	0.13573	0.81241	0.211061	0.846215	0.815686	0.722829	0.92474	0.0244248	0.643925	0.881125	0.827273	0.928925	0.598847	0.900238	0.798385	0.797157	0.82226	0.222772	0.922458	0.757751	0.931829
0.483085	0.519539	0.967217	0.237294	0.836789	0.102873	0.622329	0.00943237	0.216672	0.0162843	0.889672	0.945226	0.957315	0.136224	0.761311	0.641252	0.957527	0.969431	0.83689	0.91343	0.874626	0.876943	0.908454	0.893479	0.869706	0.928725	0.681823	0.848419	0.879279	0.095349	0.848038	0.242324	0.769455	0.903478	0.799873	0.701786	0.0150003	0.353759	0.825493	0.791837	0.92891	0.653468	0.684574	0.844118	0.819672	0.78632	0.511589	0.82874	0.799747	0.945199
0.489554	0.530052	0.942641	0.306924	0.868018	0.186406	0.455439	0.0396916	0.209184	0.0308762	0.844262	0.95586	0.911439	0.0674382	0.707397	0.61064	0.941368	0.958797	0.887939	0.885406	0.899923	0.753182	0.895066	0.831967	0.814528	0.869949	0.691553	0.907331	0.846511	0.31418	0.833836	0.269251	0.81574	0.885906	0.876976	0.878392	0.0445335	0.699168	0.880984	0.850202	0.945485	0.680092	0.875673	0.898633	0.695955	0.712326	0.592295	0.862768	0.853819	0.856525
0.41891	0.268347	0.924651	0.146779	0.846025	0.112576	0.465523	0.0163067	0.209709	0.0232193	0.880349	0.951492	0.939024	0.0501944	0.641351	0.618702	0.94541	0.974171	0.886266	0.89492	0.799337	0.818125	0.888953	0.868951	0.848826	0.883671	0.674374	0.683461	0.892788	0.359886	0.816302	0.254292	0.820859	0.854701	0.886391	0.822115	0.0236529	0.554553	0.829575	0.824374	0.88446	0.643743	0.900968	0.879776	0.78996	0.730662	0.34187	0.918095	0.727796	0.92918
0.401521	0.317471	0.945621	0.339734	0.87382	0.188099	0.492643	0.0222681	0.202674	0.0152494	0.88059	0.952651	0.94589	0.0417156	0.552729	0.658232	0.935048	0.941396	0.891086	0.892022	0.852694	0.878321	0.851436	0.855063	0.841777	0.934344	0.715715	0.878443	0.893019	0.151204	0.814727	0.278984	0.858219	0.78663	0.854922	0.909629	0.0252314	0.618999	0.909924	0.829945	0.940384	0.702747	0.916314	0.901464	0.797189	0.729016	0.284459	0.937048	0.784393	0.867198
0.444263	0.392829	0.924252	0.207725	0.836569	0.18768	0.374959	0.0217662	0.208158	0.0153986	0.836626	0.922662	0.921512	0.0294455	0.725788	0.606855	0.938514	0.961683	0.891635	0.921572	0.890698	0.840006	0.867756	0.793346	0.833569	0.882074	0.691264	0.902418	0.865993	0.396572	0.789612	0.229123	0.833871	0.912788	0.846703	0.917482	0.0208869	0.776604	0.963271	0.759827	0.950619	0.592585	0.876658	0.810552	0.643869	0.752656	0.306942	0.877862	0.783126	0.833273
0.718807	0.53204	0.948647	0.193505	0.851694	0.177469	0.474235	0.0409816	0.209119	0.0218652	0.786407	0.963517	0.962781	0.0762104	0.712019	0.610348	0.935844	0.939319	0.842525	0.938189	0.885761	0.856278	0.81619	0.84406	0.793287	0.874577	0.699514	0.899338	0.866768	0.128976	0.811107	0.288557	0.828859	0.784084	0.822287	0.928371	0.0217632	0.7952	0.91339	0.856166	0.946974	0.661651	0.874106	0.88433	0.805403	0.736466	0.20683	0.580797	0.689929	0.898827
0.456948	0.474376	0.923461	0.348216	0.888976	0.147703	0.44821	0.0139579	0.233812	0.0158641	0.861635	0.466564	0.969676	0.0524103	0.727682	0.548163	0.973411	0.973058	0.87549	0.923366	0.869868	0.823425	0.8793	0.857296	0.825234	0.904547	0.697162	0.886948	0.879214	0.0846367	0.839157	0.285778	0.907803	0.86631	0.857698	0.859862	0.0150566	0.594638	0.864812	0.808399	0.962219	0.707906	0.899156	0.80717	0.720788	0.77763	0.340127	0.942377	0.731972	0.873691
0.474706	0.417442	0.933968	0.144586	0.844197	0.167359	0.470692	0.0255997	0.244107	0.0151318	0.840833	0.941879	0.944824	0.0719374	0.702265	0.639297	0.950415	0.965349	0.882716	0.885161	0.894715	0.816505	0.884542	0.84187	0.803388	0.899773	0.705172	0.923272	0.87706	0.257059	0.825142	0.305879	0.853961	0.868404	0.806889	0.890639	0.0467499	0.676077	0.896787	0.845326	0.965766	0.702998	0.892476	0.907067	0.738211	0.764953	0.257021	0.794323	0.799371	0.895078
0.529083	0.52502	0.90824	0.180423	0.857278	0.141415	0.613014	0.0643756	0.213479	0.0442492	0.811976	0.946697	0.907546	0.085386	0.622305	0.411006	0.950326	0.934036	0.887848	0.928399	0.891105	0.780367	0.924883	0.828882	0.764224	0.850666	0.679199	0.873636	0.869665	0.247167	0.812071	0.299863	0.819309	0.886567	0.786049	0.881029	0.0274883	0.721521	0.937338	0.822642	0.950088	0.592198	0.874964	0.828882	0.568641	0.753496	0.348373	0.919312	0.770496	0.885227
0.457866	0.526527	0.903748	0.272174	0.823161	0.143129	0.453301	0.0780253	0.258463	0.0246513	0.789901	0.945448	0.932941	0.0703466	0.665578	0.560648	0.963235	0.923306	0.899116	0.941598	0.814256	0.786357	0.907155	0.804246	0.814513	0.882396	0.719524	0.888379	0.858757	0.347257	0.815356	0.35175	0.866951	0.867063	0.804762	0.852886	0.0287023	0.652253	0.91213	0.808649	0.973335	0.700477	0.866357	0.803703	0.693299	0.764421	0.284812	0.766498	0.788839	0.907613
0.408152	0.498866	0.92753	0.186637	0.842487	0.175268	0.511279	0.0244387	0.211893	0.0229256	0.81361	0.931282	0.945059	0.0782963	0.649482	0.460686	0.950702	0.949309	0.866681	0.90635	0.883466	0.808647	0.839058	0.816519	0.832371	0.876401	0.733926	0.927324	0.872218	0.294716	0.800097	0.323811	0.843666	0.920648	0.921338	0.931319	0.0370527	0.580407	0.845437	0.846151	0.938617	0.687521	0.874113	0.885157	0.66921	0.718024	0.33744	0.861497	0.820428	0.873191
0.495617	0.480597	0.899548	0.207314	0.881258	0.163326	0.49348	0.0523443	0.19392	0.0101198	0.768197	0.934259	0.929471	0.103026	0.598696	0.593448	0.936649	0.936776	0.932603	0.888861	0.876383	0.778777	0.942626	0.81452	0.763453	0.864233	0.699667	0.868317	0.823734	0.324633	0.795497	0.247134	0.803463	0.778699	0.875524	0.900703	0.0152363	0.61549	0.926702	0.841698	0.950377	0.545217	0.806212	0.911181	0.65035	0.714913	0.352404	0.841177	0.838557	0.941752
0.563736	0.450973	0.912433	0.194093	0.864937	0.199277	0.527228	0.0559996	0.210134	0.00925212	0.841372	0.935789	0.931009	0.100565	0.725014	0.599478	0.947413	0.937128	0.869553	0.91444	0.862137	0.843171	0.90827	0.840606	0.870474	0.855323	0.718489	0.899148	0.895941	0.320792	0.788098	0.287339	0.836434	0.930773	0.888889	0.868169	0.0360603	0.742804	0.893342	0.813557	0.939498	0.664328	0.894966	0.881992	0.775879	0.779287	0.346224	0.79125	0.794141	0.863014
0.512652	0.466294	0.917879	0.276113	0.84297	0.181207	0.495056	0.0257399	0.225085	0.018741	0.796268	0.95423	0.932775	0.0822595	0.584665	0.49554	0.936713	0.970542	0.885597	0.81994	0.899148	0.791888	0.870717	0.806703	0.838319	0.874874	0.71318	0.908507	0.851192	0.398252	0.782546	0.300754	0.868385	0.855846	0.807357	0.847794	0.0261636	0.651134	0.855196	0.837389	0.937479	0.622992	0.854831	0.859807	0.73248	0.78663	0.448362	0.872174	0.834249	0.816102
0.532913	0.384595	0.920348	0.277286	0.831303	0.163084	0.389731	0.042559	0.225225	0.0405604	0.833565	0.961261	0.880971	0.0741238	0.717843	0.575095	0.962285	0.955192	0.85081	0.95697	0.903575	0.817949	0.839804	0.814686	0.837816	0.871484	0.715129	0.911984	0.839786	0.254539	0.840631	0.262004	0.827182	0.858807	0.815642	0.896053	0.0447096	0.586561	0.821429	0.850911	0.941315	0.646024	0.848098	0.864838	0.704381	0.687053	0.275924	0.814993	0.809605	0.892383
0.503688	0.310938	0.923277	0.165179	0.848347	0.132884	0.643227	0.0320157	0.221197	0.0155802	0.810433	0.928257	0.964016	0.0655577	0.45567	0.530267	0.931371	0.964737	0.867973	0.844218	0.901639	0.806561	0.906491	0.84543	0.824545	0.922599	0.726317	0.888544	0.878512	0.0675777	0.774282	0.297597	0.888476	0.880078	0.836023	0.893705	0.0236808	0.591828	0.830566	0.820689	0.944349	0.651632	0.885477	0.86603	0.765314	0.790847	0.316948	0.942852	0.750926	0.868385
0.507576	0.527975	0.930246	0.229504	0.859768	0.150384	0.557447	0.0228202	0.247161	0.0194681	0.842195	0.954994	0.934168	0.0738481	0.717632	0.536955	0.952365	0.962733	0.887063	0.883772	0.815712	0.810499	0.91492	0.852312	0.819412	0.91859	0.719274	0.906591	0.908199	0.271504	0.830489	0.327348	0.873201	0.84165	0.892734	0.869981	0.0226631	0.7787	0.869565	0.846356	0.930202	0.644121	0.887578	0.85243	0.724966	0.778438	0.237363	0.896986	0.747092	0.919411
0.469342	0.520527	0.931722	0.224516	0.827152	0.23819	0.526445	0.0488769	0.238037	0.0164018	0.763785	0.959593	0.916956	0.0836477	0.691713	0.347576	0.952813	0.952378	0.906263	0.951866	0.932765	0.810539	0.931389	0.846343	0.819523	0.844595	0.672949	0.888315	0.854999	0.243113	0.779629	0.296066	0.827632	0.877686	0.85498	0.93846	0.0581298	0.572276	0.85175	0.823542	0.937929	0.59843	0.838793	0.87199	0.605987	0.700259	0.349977	0.911403	0.837506	0.846525
0.468198	0.272889	0.909221	0.249234	0.816999	0.138901	0.484949	0.014978	0.242019	0.00142911	0.849605	0.950379	0.938501	0.0501434	0.76917	0.448251	0.977191	0.976308	0.924471	0.921628	0.88297	0.821518	0.89222	0.857609	0.830767	0.856939	0.688793	0.885171	0.881736	0.140053	0.86699	0.313429	0.806699	0.874486	0.820286	0.722146	0.0239085	0.577911	0.958492	0.820447	0.985312	0.659485	0.889977	0.807407	0.732246	0.763527	0.435362	0.711436	0.811829	0.885916
0.55577	0.552494	0.929032	0.239057	0.819916	0.135418	0.453583	0.0498267	0.218778	0.00527475	0.793083	0.938544	0.939384	0.082676	0.691052	0.581458	0.96663	0.964412	0.908396	0.910809	0.926261	0.822985	0.937552	0.831492	0.864846	0.88872	0.741887	0.89643	0.887701	0.148877	0.804636	0.322626	0.877367	0.95343	0.929912	0.804656	0.034902	0.593918	0.89216	0.811373	0.95993	0.772054	0.880677	0.870767	0.782379	0.766981	0.467061	0.770372	0.772296	0.975131
0.505853	0.56707	0.927557	0.391617	0.884704	0.150351	0.558799	0.0292954	0.236357	0.0155608	0.882003	0.951186	0.958076	0.0454956	0.658429	0.492676	0.972828	0.959309	0.960567	0.921124	0.831688	0.833248	0.935495	0.849221	0.873496	0.900914	0.708896	0.921811	0.937303	0.228276	0.87608	0.311375	0.854695	0.844624	0.856929	0.871596	0.0219407	0.693849	0.94954	0.852059	0.966337	0.622382	0.90427	0.895148	0.764373	0.747536	0.436281	0.838873	0.80022	0.898614
0.520838	0.376637	0.938037	0.242203	0.852167	0.113857	0.507773	0.0166659	0.195727	0.0212926	0.834909	0.964621	0.957264	0.0412291	0.723516	0.458259	0.941437	0.936806	0.873568	0.90561	0.831295	0.825689	0.895258	0.837664	0.805132	0.916088	0.646526	0.900315	0.915953	0.19944	0.797587	0.211253	0.833507	0.874325	0.870463	0.900272	0.0254964	0.671239	0.926049	0.868859	0.937084	0.572482	0.915719	0.860629	0.722712	0.780044	0.328384	0.854204	0.899835	0.882152
0.61691	0.416122	0.964052	0.340119	0.867912	0.14222	0.411098	0.0125294	0.206374	0.00392693	0.840678	0.950363	0.936186	0.0432985	0.707018	0.487555	0.940759	0.97052	0.877764	0.946887	0.853929	0.875853	0.929595	0.875753	0.847946	0.924322	0.668466	0.890135	0.908467	0.211834	0.809258	0.257604	0.833603	0.938536	0.887075	0.895348	0.00782963	0.63867	0.896321	0.865259	0.924495	0.726838	0.89274	0.934199	0.788862	0.821364	0.359974	0.785578	0.879534	1
0.514689	0.56917	0.912114	0.163023	0.811821	0.129593	0.472944	0.00360523	0.210712	0.000776315	0.755439	0.943764	0.910185	0.0636974	0.64869	0.594752	0.942602	0.9202	0.912468	0.92034	0.928117	0.806006	0.887474	0.797757	0.783236	0.880051	0.69	0.887941	0.854405	0.330905	0.8085	0.204589	0.801346	0.933857	0.948213	0.875969	0.00887267	0.599161	0.864994	0.836757	0.936651	0.521001	0.83754	0.920505	0.639073	0.733663	0.40933	0.867202	0.843461	0.907898
0.419515	0.595675	0.958593	0.240827	0.895707	0.107198	0.391658	0.0108422	0.201396	0.00998825	0.943838	0.957399	0.969989	0.0198109	0.752112	0.712212	0.965917	0.989821	0.901842	0.969204	0.823797	0.80388	0.865562	0.84902	0.874116	0.933919	0.607449	0.934108	0.892825	0.356071	0.843965	0.231792	0.852089	0.926261	0.878065	0.880756	0.0203226	0.624746	0.98984	0.865162	0.960619	0.657434	0.931996	0.918633	0.847257	0.723013	0.255526	0.783607	0.951805	0.927463
0.516628	0.419712	0.951731	0.168125	0.880094	0.116772	0.440019	0.0074927	0.146069	0.00740829	0.915278	0.95374	0.958468	0.0532107	0.833071	0.380688	0.951351	0.975624	0.951494	0.958137	0.925902	0.868394	0.901606	0.858989	0.835129	0.907288	0.633356	0.909649	0.84176	0.224421	0.845213	0.236563	0.872441	0.829345	0.928188	0.917359	0.0281666	0.588435	0.917508	0.868006	0.959568	0.727534	0.923935	0.886304	0.873531	0.705088	0.305522	0.76731	0.917774	0.950295
0.474049	0.517388	0.930883	0.24844	0.888791	0.108759	0.482738	0.0137522	0.213147	0.0119993	0.894031	0.258023	0.966901	0.0425314	0.740222	0.679875	0.95454	0.961988	0.900764	0.937913	0.820796	0.805334	0.918064	0.870948	0.815812	0.925424	0.668397	0.905417	0.881227	0.179102	0.820067	0.221617	0.855675	0.890933	0.865463	0.90181	0.0123526	0.620235	0.890651	0.858895	0.969092	0.61785	0.889724	0.90219	0.82251	0.738848	0.345778	0.874433	0.879551	0.991423
0.474066	0.389148	0.92991	0.200248	0.807478	0.144352	0.54272	0.0225719	0.235093	0.0948028	0.790775	0.955384	0.936925	0.0438871	0.63207	0.777778	0.954844	0.971346	0.871913	0.86542	0.899074	0.769222	0.852819	0.829637	0.813003	0.885482	0.648188	0.912237	0.880799	0.351191	0.815693	0.250627	0.838764	0.900164	0.7385	0.883365	0.128807	0.61404	0.925643	0.876206	0.992873	0.641193	0.843574	0.705483	0.748426	0.746936	0.39264	0.706186	0.878287	0.879004
0.635747	0.3208	0.936343	0.263375	0.852376	0.122877	0.476909	0.0158526	0.222457	0.00868408	0.84254	0.969799	0.9424	0.0844915	0.679842	0.578613	0.947364	0.962957	0.843379	0.954312	0.883245	0.831472	0.880973	0.847587	0.823629	0.932225	0.643335	0.90684	0.884224	0.254937	0.850224	0.236059	0.859725	0.992658	0.836255	0.925232	0.0240739	0.650267	0.87427	0.869688	0.929383	0.647003	0.900928	0.917574	0.784403	0.791433	0.406729	0.871875	0.855356	0.839088
0.556642	0.553607	0.937052	0.185285	0.843775	0.162244	0.439559	0.0195318	0.214448	0.0599781	0.835066	0.955901	0.960667	0.0678323	0.673916	0.351925	0.95276	0.961572	0.943887	0.930783	0.911555	0.816775	0.941343	0.827786	0.784971	0.911684	0.679913	0.802815	0.886898	0.359792	0.866809	0.309625	0.831079	0.900474	0.865653	0.90768	0.0223454	0.740486	0.880631	0.866428	0.983874	0.624905	0.889772	0.762792	0.811835	0.774128	0.408465	0.892711	0.889136	0.923881
0.626352	0.429743	0.933227	0.327013	0.855177	0.111364	0.404096	0.0163431	0.20028	0.00859291	0.890043	0.964074	0.923615	0.038389	0.720673	0.536643	0.951245	0.962239	0.900431	0.898257	0.890576	0.832762	0.889394	0.884609	0.822387	0.922266	0.663339	0.900968	0.847694	0.205229	0.8525	0.2513	0.857097	0.922548	0.719858	0.886132	0.0261068	0.680756	0.91905	0.890431	0.943035	0.735419	0.900994	0.935064	0.775807	0.802209	0.19234	0.857161	0.876679	0.936312
0.524268	0.448931	0.942444	0.183658	0.894061	0.134043	0.528391	0.00852041	0.195255	0.00656353	0.90609	0.966394	0.962623	0.127337	0.752042	0.476111	0.966911	0.969714	0.915667	0.988945	0.950043	0.811034	0.929472	0.846317	0.839386	0.952752	0.647631	0.9237	0.915912	0.0910055	0.851258	0.294361	0.866599	0.951945	0.900165	0.908917	0.00617284	0.750471	0.925178	0.87874	0.96912	0.718083	0.892537	0.893837	0.837735	0.693133	0.325217	0.773908	0.90028	0.962226
0.48976	0.48867	0.934979	0.122215	0.8866	0.112112	0.490096	0.0307987	0.215104	0.0081923	0.92158	0.969861	0.95604	0.0576856	0.800173	0.4236	0.957512	0.985033	0.947022	0.971599	0.894875	0.849943	0.910423	0.860539	0.856151	0.939823	0.649286	0.92777	0.929699	0.177574	0.865882	0.250985	0.805389	0.905783	0.860444	0.926941	0.00352507	0.726581	0.854741	0.857877	0.978612	0.654535	0.913043	0.825974	0.797021	0.81611	0.464864	0.852407	0.850165	1
0.50314	0.322223	0.940981	0.430347	0.887184	0.114165	0.458594	0.020769	0.237599	0.0264375	0.90843	0.937704	0.958242	0.148593	0.7809	0.572959	0.964165	0.96971	0.8685	0.957407	0.857316	0.794732	0.890828	0.838286	0.852793	0.929181	0.629921	0.903179	0.921461	0.182054	0.829673	0.274668	0.889938	0.666408	0.884016	0.917794	0.0116111	0.522967	0.933903	0.860275	0.955192	0.716323	0.906715	0.86167	0.842157	0.785692	0.316564	0.868977	0.913159	0.878128
0.460811	0.441034	0.942836	0.148803	0.844967	0.104152	0.559645	0.00663598	0.206108	0.0216859	0.868614	0.95643	0.954313	0.0508832	0.646882	0.638999	0.965915	0.969964	0.973577	0.915391	0.946804	0.80064	0.918919	0.847523	0.807748	0.925458	0.624755	0.883491	0.888889	0.222163	0.815195	0.251157	0.854384	0.878215	0.641361	0.897005	0.0167417	0.702713	0.907119	0.881357	0.98222	0.589524	0.89735	0.851197	0.762909	0.719192	0.435466	0.834351	0.858656	0.868239
0.592048	0.37071	0.907007	0.148433	0.884852	0.112918	0.498894	0.046749	0.188814	0.015896	0.897308	0.962059	0.927735	0.0615836	0.776348	0.675663	0.934168	0.966855	0.875632	0.900051	0.857529	0.789608	0.87604	0.816064	0.827783	0.927638	0.683871	0.918741	0.843086	0.457173	0.815341	0.260703	0.832756	0.751265	0.926914	0.921395	0.106724	0.732364	0.876676	0.871114	0.966235	0.609448	0.891157	0.721789	0.661715	0.734574	0.327066	0.927008	0.87436	0.896999
0.457183	0.492488	0.933768	0.274701	0.861346	0.128019	0.440392	0.0189877	0.251458	0.0174531	0.919788	0.923592	0.953216	0.0711539	0.680099	0.5461	0.965102	0.94527	0.915659	0.967005	0.875648	0.83589	0.961555	0.858293	0.809858	0.897418	0.620751	0.906726	0.941363	0.221514	0.835841	0.300606	0.811592	0.899034	1	0.910905	0	0.758389	0.990721	0.847878	0.940778	0.628273	0.92642	0.804813	0.786357	0.789067	0.44059	0.957152	0.870039	0.930904
0.47766	0.606366	0.940514	0.123205	0.844405	0.112249	0.433992	0.0103097	0.255041	0.019018	0.929754	0.959138	0.980476	0.0469197	0.796924	0.627336	0.953258	0.960208	0.94197	0.916056	0.794423	0.857644	0.958114	0.880315	0.827849	0.946538	0.647711	0.915696	0.883326	0.0782516	0.857953	0.306818	0.872467	0.936836	0.802887	0.919211	0.00470703	0.856326	0.86234	0.808426	0.991059	0.686002	0.928873	0.762799	0.884386	0.834872	0.167314	0.753376	0.869388	0.911354
0.542163	0.535818	0.908216	0.310845	0.836333	0.135714	0.435029	0.0272578	0.229293	0.0266922	0.794058	0.952802	0.963368	0.0904532	0.693302	0.575098	0.96658	0.948537	0.919516	0.973488	0.8677	0.826034	0.914697	0.837282	0.795289	0.876953	0.628513	0.913536	0.868019	0.403025	0.831063	0.289386	0.83315	0.915293	0.901359	0.93047	0.0130872	0.599424	0.878037	0.842627	0.939516	0.715398	0.905307	0.883496	0.763883	0.798805	0.472591	0.880447	0.874731	0.891119
0.549669	0.672753	0.921969	0.388262	0.850065	0.126039	0.472191	0.0180401	0.234261	0.00851481	0.871596	0.958383	0.988312	0.0967861	0.715448	0.627241	0.979689	0.974212	0.897959	0.933373	0.882381	0.805129	0.952037	0.868881	0.84427	0.875104	0.689878	0.931034	0.891959	0.431723	0.84184	0.24059	0.86677	0.795307	0.952181	0.896603	0.0116501	0.6813	0.890972	0.848995	1	0.676593	0.897373	0.870648	0.816482	0.78465	0.360685	0.842649	0.859391	0.904986
0.539242	0.501901	0.947869	0.144524	0.868198	0.147228	0.45154	0.0108763	0.243108	0.0253275	0.916488	0.955755	0.96015	0.102142	0.767674	0.671435	0.967118	0.969238	0.907942	0.911716	0.917273	0.798366	0.957064	0.858237	0.817897	0.891301	0.635633	0.905042	0.909468	0.425853	0.790374	0.283221	0.865401	0.888524	0.926931	0.930935	0.0123434	0.670267	0.958304	0.849068	0.943047	0.677521	0.905738	0.895165	0.748435	0.720536	0.338797	0.866797	0.917475	0.942827
0.475664	0.4738	0.948219	0.232582	0.852005	0.183694	0.484052	0.0139654	0.217327	0.0147037	0.917933	0.953288	0.968402	0.07786	0.780186	0.728598	0.977242	0.971276	0.960393	0.941631	0.941139	0.828169	0.929491	0.873833	0.840476	0.922095	0.667109	0.925059	0.928841	0.237335	0.792498	0.241074	0.83216	0.921097	0.882155	0.903615	0.000277701	0.72976	0.934451	0.882353	0.989749	0.646516	0.897484	0.853814	0.775772	0.78352	0.413621	0.866075	0.85411	0.844108
0.41814	0.44589	0.919119	0.167135	0.861954	0.143356	0.703809	0.0119863	0.24489	0.00601288	0.886364	0.935429	0.970297	0.051635	0.728613	0.343364	0.978099	0.959407	1	0.969023	0.832257	0.809674	0.956418	0.853491	0.813922	0.915985	0.673394	0.905977	0.893322	0.0983988	0.826219	0.282962	0.820185	0.869219	0.896104	0.889892	0.0118357	0.522527	0.903627	0.8621	0.960119	0.767979	0.890602	0.911026	0.80124	0.772182	0.309185	0.934149	0.83305	0.844783
0.451059	0.509341	0.949075	0.187576	0.878807	0.113289	0.542114	0.00928861	0.215438	0.0206694	0.892242	0.962359	0.970235	0.0358595	0.753878	0.42715	0.958281	0.97997	0.891375	0.950658	0.868944	0.830466	0.92752	0.86311	0.828352	0.901853	0.717325	0.899484	0.932893	0.369281	0.820402	0.303721	0.842436	0.814577	0.849951	0.895335	0.028709	0.740497	0.99429	0.843993	0.962446	0.6868	0.896516	0.849931	0.839884	0.786669	0.290345	0.834341	0.90613	0.919062
0.506001	0.426728	0.941802	0.195965	0.862015	0.11084	0.500899	0.0120503	0.231575	0.00675719	0.882541	0.946826	0.953782	0.0557555	0.768268	0.574227	0.961164	0.984332	0.941703	0.944217	0.882272	0.840345	0.926851	0.842028	0.825277	0.91974	0.684141	0.909142	0.90248	0.410612	0.80744	0.330006	0.844259	0.9515	1	0.955152	0.0148586	0.739024	0.883484	0.834749	0.95682	0.663655	0.878573	0.888196	0.82419	0.732187	0.456898	0.905147	0.864449	1
0.531784	0.50707	0.922236	0.146874	0.830002	0.100659	0.520435	0.0124119	0.19764	0.0102291	0.890481	0.929111	0.962908	0.0749216	0.807005	0.569572	0.945878	0.960302	0.875582	0.910631	0.929521	0.861453	0.916406	0.861294	0.859424	0.898273	0.652738	0.92109	0.903614	0.324572	0.859352	0.258457	0.786771	0.873039	0.896351	0.886841	0.0157375	0.80789	0.842761	0.850678	0.964765	0.746119	0.91959	0.935851	0.827283	0.737073	0.294232	0.836139	0.866149	0.959556
0.530793	0.444266	0.924647	0.255992	0.849084	0.129639	0.660932	0.0099543	0.204715	0.0160199	0.888467	0.92689	0.950942	0.0554682	0.745393	0.606429	0.954829	0.970852	0.868994	0.922708	0.832348	0.848614	0.887795	0.894229	0.846606	0.923537	0.679916	0.909018	0.87248	0.307791	0.813959	0.23538	0.853519	0.861849	0.948477	0.88541	0.0185253	0.650358	0.943169	0.863744	0.968982	0.663618	0.883621	0.942945	0.83388	0.755749	0.41284	0.881628	0.91403	0.914959
0.604957	0.429727	0.932202	0.222281	0.833069	0.0888217	0.49785	0.0310903	0.210735	0.0085796	0.806039	0.970605	0.944766	0.0829818	0.663661	0.621017	0.944082	0.971141	0.935474	0.975648	0.918642	0.803588	0.90355	0.812392	0.793628	0.883066	0.635717	0.904251	0.836464	0.087066	0.840204	0.19159	0.841889	0.83859	0.964927	0.870216	0.0534402	0.395858	0.962932	0.840129	0.985918	0.641899	0.890712	0.755537	0.691409	0.785032	0.277804	0.823967	0.815517	0.961279
0.559358	0.444268	0.937154	0.253202	0.867753	0.133112	0.460345	0.00727744	0.174593	0	0.862012	0.978344	0.979404	0.0301795	0.782781	0.623538	0.974612	0.975249	0.92358	0.877032	0.952575	0.80037	0.907851	0.86466	0.889628	0.920595	0.674733	0.93459	0.919776	0.253019	0.841671	0.240344	0.903213	0.847771	0.875731	0.942312	0.0112872	0.54291	0.941818	0.869787	0.979155	0.752008	0.938395	0.755887	0.884615	0.773689	0.30234	0.827836	0.836436	0.951099
0.486093	0.529489	0.935843	0.309221	0.87102	0.14542	0.467645	0.0226578	0.281072	0.00385905	0.855185	0.949036	0.944315	0.0583113	0.783469	0.660099	0.949581	0.962415	0.899413	0.895728	0.872495	0.825259	0.921495	0.83393	0.814288	0.917115	0.660421	0.89609	0.880555	0.268032	0.835693	0.312314	0.82067	0.886364	0.917205	0.911632	0.0154067	0.69569	0.913704	0.841484	0.952258	0.706095	0.880129	0.844018	0.796019	0.815312	0.336526	0.668832	0.855915	0.867653
0.456772	0.65504	0.935017	0.249807	0.847075	0.149585	0.47889	0.075488	0.268163	0.0733366	0.820679	0.928096	0.925038	0.0696897	0.592385	0.565067	0.929292	0.951675	0.897571	0.993552	0.9205	0.759058	0.903466	0.832503	0.793834	0.90713	0.692994	0.9027	0.889159	0.308328	0.816178	0.300268	0.798125	0.950855	0.83085	0.929281	0.0368995	0.745191	0.9817	0.859796	0.963882	0.618037	0.896106	0.838439	0.719453	0.798729	0.367037	0.814139	0.850919	0.871173
0.44584	0.451373	0.960441	0.223458	0.883192	0.209887	0.377467	0.0224348	0.292925	0.00993355	0.87843	0.96715	0.935344	0.0626918	0.758133	0.546159	0.955528	0.965987	0.989542	0.958181	0.877784	0.859281	0.855746	0.876201	0.855608	0.905313	0.704564	0.90222	0.858051	0.273817	0.839015	0.312921	0.822976	0.994319	0.738051	0.966264	0.0499783	0.711907	0.964765	0.8744	0.944132	0.757071	0.898005	0.862111	0.735291	0.799408	0.217939	0.824985	0.760079	0.866644
0.514736	0.48833	0.929759	0.211981	0.883717	0.128236	0.446245	0.00898863	0.208784	0.0131082	0.841907	0.954971	0.939763	0.169841	0.609548	0.376554	0.963445	0.969541	0.890169	0.915908	0.830307	0.80583	0.851155	0.812899	0.794105	0.875849	0.68487	0.899036	0.856053	0.141776	0.813564	0.196409	0.788335	0.707372	0.896455	0.916696	0.0150294	0.593482	0.958097	0.834758	0.928299	0.560038	0.883112	0.803076	0.734248	0.755532	0.400527	0.9218	0.807221	0.85989
0.425014	0.453229	0.919956	0.115328	0.876713	0.123237	0.478036	0.0137256	0.208585	0.0108596	0.873127	0.950642	0.957319	0.0812403	0.713231	0.539319	0.973775	0.958463	0.89089	0.904988	0.904108	0.834728	0.902008	0.851438	0.853878	0.903034	0.705851	0.865667	0.855428	0.153041	0.850181	0.293957	0.833217	0.845335	0.838571	0.910556	0.0138873	0.646929	0.91734	0.841375	0.959081	0.747685	0.918108	0.882135	0.707593	0.727186	0.272891	0.895	0.806913	0.937391
0.573599	0.476443	0.918661	0.186746	0.902777	0.134301	0.467109	0.0279843	0.205974	0.0119217	0.843483	0.94136	0.935191	0.0505215	0.644373	0.48204	0.947628	0.965744	0.883894	0.922993	0.943577	0.805479	0.890192	0.852947	0.847942	0.91965	0.713942	0.921089	0.877463	0.29464	0.811715	0.25769	0.817017	0.951807	0.875667	0.945365	0.0191864	0.678956	0.819452	0.871874	0.991267	0.580808	0.856188	0.895751	0.743443	0.79499	0.3676	0.895565	0.855935	0.914837
0.490541	0.608017	0.926377	0.303908	0.855893	0.138752	0.491045	0.0186856	0.235529	0.00165623	0.856679	0.949864	0.963826	0.0383366	0.684726	0.513577	0.971992	0.954917	0.931279	0.940158	0.914904	0.760251	0.907878	0.856378	0.83321	0.921954	0.683069	0.929543	0.911209	0.386672	0.856229	0.294372	0.867685	0.946675	0.897714	0.923683	0.0221776	0.65978	0.959874	0.884945	0.941566	0.681785	0.913079	0.842163	0.761091	0.701684	0.266223	0.929379	0.887857	0.935731
0.489176	0.489202	0.945211	0.203057	0.928743	0.118794	0.479107	0.00864665	0.186446	0.00537845	0.95177	0.957047	0.974676	0.0556371	0.786784	0.726166	0.939003	0.977584	0.919479	0.867233	0.911075	0.898232	0.936547	0.90557	0.906194	0.960728	0.73691	0.9437	0.939261	0.2226	0.842145	0.27118	0.930412	0.873888	0.928354	0.968747	0.0134623	0.594922	0.879015	0.871386	0.996119	0.702802	0.941115	0.946198	0.85334	0.798831	0.303154	0.893117	0.844482	0.910491
0.504824	0.349091	0.938606	0.155781	0.895751	0.202476	0.429012	0.0122517	0.218701	0.00836383	0.859413	0.950261	0.965537	0.0210936	0.604933	0.581959	0.956827	0.965488	0.903391	0.910684	0.875199	0.843534	0.951988	0.88888	0.819572	0.920665	0.700568	0.914242	0.883172	0.100203	0.804799	0.220627	0.8676	0.932425	0.920732	0.849496	0.010014	0.559165	0.92033	0.868869	0.963602	0.757963	0.923022	0.898632	0.802031	0.795965	0.464705	0.845967	0.881667	0.921782
0.553352	0.585131	0.916052	0.507428	0.843832	0.172097	0.518698	0.110915	0.266971	0.0307775	0.787027	0.95403	0.881686	0.114067	0.624	0.492371	0.952788	0.894111	0.851355	0.933333	0.907666	0.764099	0.937472	0.784497	0.779814	0.844418	0.730832	0.922932	0.817143	0.339801	0.786674	0.319689	0.79934	0.9319	0.88318	0.890524	0.0422876	0.677752	0.954742	0.844831	0.967703	0.632303	0.862706	0.825405	0.63929	0.800285	0.34473	0.816677	0.841504	0.92988
0.522431	0.539068	0.901203	0.223883	0.854898	0.121871	0.494385	0.0262649	0.240337	0.0159307	0.861696	0.941723	0.947782	0.0932807	0.683338	0.584452	0.962597	0.962008	0.884118	0.948975	0.869515	0.811079	0.840744	0.800484	0.827043	0.897427	0.664261	0.922516	0.877896	0.0762718	0.866963	0.280824	0.811672	0.821016	0.929457	0.882168	0.0207037	0.660801	0.959646	0.849401	0.967528	0.622854	0.891746	0.930182	0.693875	0.690807	0.377024	0.96277	0.780467	0.887557
0.435237	0.388281	0.933713	0.251051	0.880485	0.131467	0.38468	0.0109524	0.196294	0.0120475	0.875751	0.944416	0.970751	0.0538258	0.766905	0.602163	0.961611	0.98032	0.878423	0.971575	0.893472	0.881781	0.920796	0.872443	0.874115	0.930801	0.706518	0.904034	0.881726	0.206993	0.80974	0.233534	0.883109	0.91082	0.872466	0.922828	0.0162987	0.503283	0.901006	0.833931	0.964236	0.666041	0.908505	0.840691	0.805152	0.784164	0.296912	0.865399	0.800957	0.982296
0.560194	0.476867	0.935347	0.138509	0.845816	0.0955391	0.495261	0.0111405	0.201464	0.0347383	0.853564	0.954792	0.935029	0.042115	0.694679	0.651425	0.937979	0.98205	0.848057	0.917153	0.88692	0.837214	0.888638	0.852092	0.810069	0.928098	0.65077	0.91376	0.882059	0.265784	0.830306	0.224755	0.872065	0.82273	0.832026	0.88197	0.0361059	0.676567	0.908172	0.834641	0.955699	0.73915	0.888786	0.831707	0.862525	0.668879	0.501037	0.882545	0.831235	0.977983
0.575513	0.542744	0.916914	0.349305	0.858923	0.102316	0.406341	0.0110348	0.236714	0.0113149	0.882302	0.955774	0.964875	0.0339465	0.778516	0.591049	0.954196	0.967504	0.930667	0.89308	0.888135	0.876945	0.84836	0.854197	0.84482	0.912525	0.651522	0.910129	0.904721	0.205639	0.849383	0.238682	0.868607	0.837894	0.838453	0.917958	0.0164898	0.669386	0.854523	0.846312	0.957145	0.724645	0.905923	0.876225	0.80156	0.839107	0.335804	0.823762	0.815208	0.940007
0.659908	0.452704	0.919044	0.276058	0.873218	0.16611	0.438606	0.0125869	0.224351	0.0165061	0.869222	0.953201	0.928214	0.0447373	0.692758	0.616257	0.974857	0.935191	0.897463	0.948134	0.790414	0.787465	0.891788	0.875673	0.831535	0.850737	0.645273	0.901611	0.829071	0.451378	0.845027	0.277051	0.847377	0.899559	0.792418	0.949891	0.00860141	0.689384	0.887876	0.838557	0.943696	0.627383	0.868739	0.909314	0.773918	0.775307	0.679172	0.964917	0.875751	0.909378
0.596877	0.464683	0.941475	0.283332	0.85246	0.131	0.664781	0.0217211	0.20556	0.0462579	0.805135	0.948065	0.931408	0.0648666	0.679948	0.351371	0.951116	0.954017	0.836675	0.914613	0.86826	0.826759	0.99372	0.847	0.789693	0.923801	0.64049	0.889782	0.8953	0.298227	0.872791	0.212648	0.83393	0.798024	0.936598	0.907477	0.0204175	0.662019	0.933499	0.851841	0.956816	0.642697	0.853681	0.813329	0.765553	0.805124	0.452468	0.84051	0.8517	0.840693
0.460512	0.62733	0.943385	0.373335	0.834908	0.127114	0.451005	0.0130508	0.198976	0.0146678	0.85094	0.932244	0.96225	0.0571578	0.532454	0.587064	0.966923	0.942135	0.906735	0.920468	0.841286	0.786081	0.89619	0.834902	0.803722	0.892059	0.640583	0.889727	0.846221	0.294684	0.832172	0.229015	0.86753	0.87799	0.84821	0.894376	0.0105818	0.609071	0.956976	0.812841	0.940452	0.675812	0.870153	0.747609	0.764776	0.787392	0.47884	0.814398	0.86755	0.907621
0.437147	0.468593	0.911358	0.21428	0.849331	0.141627	0.455528	0.0423035	0.219601	0.0331344	0.854671	0.954895	0.958179	0.131355	0.727291	0.457347	0.951706	0.955491	0.936796	0.892063	0.864069	0.815224	0.897194	0.84887	0.803123	0.911071	0.625965	0.914302	0.875024	0.183656	0.823353	0.234346	0.825925	0.894126	0.892175	0.928642	0.0576585	0.58699	0.950942	0.828023	0.981866	0.741786	0.856484	0.742601	0.649028	0.782643	0.388312	0.79411	0.807543	0.917352
0.314357	0.439548	0.942101	0.0763715	0.823861	0.161798	0.532508	0.015905	0.213977	0.00984358	0.919746	0.929746	0.963468	0.107368	0.728171	0.657526	0.93875	0.978281	0.936555	0.942444	0.876338	0.860074	0.858652	0.862752	0.858927	0.88863	0.644087	0.863789	0.916661	0.099024	0.811261	0.290443	0.84979	0.84322	0.836854	0.909615	0.0222046	0.645257	0.895796	0.839112	0.965663	0.769983	0.93614	0.844444	0.843336	0.762501	0.190983	0.776376	0.873449	0.862457
0.522331	0.562949	0	0.264535	0.803322	0.161129	0.565577	0.0200176	0.234713	0.0371563	0.803655	0.945436	0.919722	0.096652	0.654931	0.54132	0.923451	0.947189	0.899884	0.968949	0.890676	0.799097	0.953054	0.837641	0.799888	0.885113	0.71267	0.840456	0.859206	0.188739	0.833606	0.319687	0.840463	0.919198	0.886997	0	0.0360218	0.671233	0.938241	0.836952	0.974308	0.659459	0.86545	0.841412	0.658537	0.721447	0.419436	0.89011	0.83848	0.831703
0.6287	0.467662	0.935734	0.305274	0.856761	0.139604	0.553722	0.0468099	0.248953	0.0240407	0.845202	0.955936	0.941956	0.0915182	0.736048	0.45074	0.953105	0.947149	0.931573	0.960746	0.89024	0.811382	0.891241	0.845528	0.796284	0.918092	0.673666	0.920256	0.882435	0.196517	0.811228	0.305902	0.832633	0.908377	0.835464	0	0.0471264	0.698455	0.938356	0.845748	0.938027	0.720352	0.901209	0.781703	0.788174	0.796033	0.290405	0.774967	0.870715	0.904011
0.441891	0.432302	0	0.20366	0.813789	0.111518	0.574956	0.0309752	0.283291	0.0639373	0.863424	0.9644	0.942817	0.143458	0.700419	0.612027	0.952836	0.974023	0.864923	0.875929	0.935496	0.828932	0.915876	0.822295	0.846145	0.836993	0.696509	0.925512	0.900229	0.216525	0.835339	0.344262	0.880529	0.875	0.828858	0.87897	0.0210888	0.635641	0.909867	0.848736	0.960585	0.630156	0.874667	0.850492	0.726513	0.72878	0.310268	0.840684	0.777877	0.880486
0.475688	0.495625	0.91076	0.283902	0.845237	0.156409	0.428631	0.0757192	0.249417	0.0208554	0.813521	0.921892	0.930276	0.124676	0.683824	0.565875	0.966429	0.928061	0.892688	0.921157	0.917498	0.811894	0.928725	0.808956	0.81149	0.868141	0.68227	0.858999	0.841283	0.336118	0.831845	0.276281	0.830595	0.918891	0.854071	0.861015	0.0165272	0.690324	0.858949	0.841769	0.96878	0.652329	0.865743	0.897461	0.721825	0.812146	0.393443	0.870226	0.872566	0.809852
0.443848	0.395543	0.924533	0.158619	0.847991	0.145277	0.484512	0.0384737	0.24001	0.0257341	0.853048	0.943527	0.939805	0.0673141	0.675488	0.48628	0.951806	0.964051	0.885246	0.929771	0.834909	0.782978	0.909903	0.843826	0.80022	0.873651	0.66536	0.889087	0.865858	0.370342	0.793119	0.309719	0.843785	0.806452	0.977408	0.857219	0.0130458	0.712008	0.884134	0.830417	0.929945	0.66016	0.883555	0.90319	0.721933	0.747007	0.363121	0.849045	0.816658	0.911927
0.412631	0.533588	0.905038	0.225746	0.822333	0.153217	0.469456	0.05	0.213188	0.0178727	0.808633	0.946644	0.954128	0.0719658	0.657046	0.418535	0.97656	0.971729	0.922437	0.9175	0.815286	0.779059	0.936217	0.825213	0.806608	0.885419	0.68409	0.88373	0.886311	0.203697	0.831914	0.287816	0.787161	0.88511	0.846782	0.926099	0.0217878	0.492447	0.887045	0.813027	0.951475	0.65972	0.862805	0.886202	0.64586	0.761666	0.237141	0.889286	0.800594	0.91364
0.421004	0.505486	0.908428	0.226504	0.838815	0.188831	0.428834	0.111766	0.289078	0.109885	0.767269	0.945248	0.919691	0.11211	0.651688	0.598553	0.972167	0.942727	0.88413	0.928854	0.910326	0.742118	0.936291	0.798628	0.770025	0.872287	0.717172	0.920566	0.836481	0.350693	0.810607	0.31753	0.756329	0.921791	0.879296	0.869084	0.133614	0.786456	0.927778	0.813443	0.947381	0.641769	0.846947	0.794447	0.692757	0.770863	0.262832	0.835254	0.84134	0.902496
0.549271	0.537656	0.93426	0.352963	0.835542	0.148672	0.461446	0.0277016	0.249978	0.0125055	0.800187	0.939154	0.92664	0.0685643	0.706199	0.568941	0.975903	0.934848	0.890226	0.94681	0.868076	0.777549	0.95252	0.835795	0.802605	0.886401	0.66578	0.89162	0.862497	0.392208	0.820951	0.314029	0.858238	0.840356	0.828464	0.852304	0.0306337	0.574267	0.902348	0.84435	0.964653	0.616479	0.879689	0.881499	0.717666	0.786485	0.259636	0.817792	0.862649	0.904957
0.462354	0.613468	0.861547	0.174582	0.799068	0.167733	0.518285	0.0402981	0.237352	0.0476534	0.800206	0.940142	0.927609	0.0734644	0.708419	0.561733	0.981243	0.937285	0.900502	0.932664	0.864405	0.788691	0.912989	0.803551	0.784113	0.851608	0.712494	0.914835	0.853609	0.344973	0.802937	0.314477	0.833172	0.94111	0.911519	0.862218	0.0419695	0.658838	0.943503	0.830491	0.971549	0.652766	0.875527	0.846549	0.668954	0.75555	0.337487	0.887256	0.82793	0.913447
0.510354	0.427658	0.928838	0.376275	0.841243	0.171409	0.443205	0.0329034	0.252173	0.0363236	0.813409	0.945259	0.931343	0.111484	0.672453	0.66655	0.949984	0.947919	0.956376	0.947969	0.956112	0.765033	0.913043	0.826513	0.788242	0.894769	0.713914	0.922383	0.853285	0.289838	0.815867	0.306475	0.831702	0.867068	0.940321	0.910379	0.0614235	0.649473	0.889421	0.811738	0.948957	0.571334	0.85964	0.870728	0.597996	0.59809	0.440239	0.796392	0.824905	0.932002
0.407077	0.429624	0.91524	0.171001	0.845218	0.196019	0.573821	0.0239859	0.19602	0.00443656	0.841414	0.930817	0.965395	0.0606159	0.713379	0.622748	0.95882	0.964993	0.911688	0.940767	0.919984	0.675024	0.876286	0.846638	0.851489	0.928851	0.765809	0.934391	0.857568	0.186635	0.802459	0.311972	0.85755	0.916041	0.878562	0.909396	0.0176667	0.669442	0.874803	0.863774	0.949675	0.668786	0.874914	0.84864	0.732141	0.788892	0.235801	0.763147	0.838694	0.941204
0.407482	0.36444	0.897427	0.314173	0.835905	0.167309	0.501755	0.0395631	0.202191	0.0623245	0.786901	0.955312	0.94289	0.0752383	0.737591	0.510139	0.964428	0.951963	0.892421	0.932506	0.860458	0.822353	0.917726	0.834782	0.808668	0.904352	0.666558	0.9141	0.864862	0.425399	0.785646	0.312505	0.831568	0.895621	0.942961	0.887393	0.0235065	0.701038	0.948379	0.797108	0.949234	0.768452	0.870278	0.830345	0.732384	0.806034	0.206305	0.89136	0.86828	0.927919
0.548722	0.657517	0.932308	0.3244	0.839652	0.0982001	0.498436	0.0430333	0.213005	0.0500862	0.857511	0.941709	0.94828	0.0529082	0.67701	0.333132	0.957584	0.963255	0.903922	0.957971	0.871334	0.81893	0.913949	0.830644	0.816594	0.907243	0.602535	0.900011	0.868992	0.318508	0.816967	0.314906	0.874356	0.85817	0.895197	0.921574	0.0188996	0.470803	0.965086	0.811944	0.946726	0.700134	0.893182	0.902497	0.801742	0.830093	0.354529	0.886819	0.864343	0.90395
0.513967	0.405905	0.910048	0.231982	0.835421	0.16972	0.487319	0.0516686	0.23414	0.0492622	0.825434	0.937742	0.935908	0.0789618	0.686371	0.624751	0.959411	0.951739	0.85772	0.94175	0.925456	0.785626	0.897046	0.834719	0.781399	0.889133	0.670245	0.916471	0.835875	0.0902936	0.771253	0.246158	0.841051	0.784185	0.859366	0.884998	0.0353604	0.707891	0.912907	0.867116	0.93675	0.71727	0.863258	0.855239	0.684431	0.720467	0.39929	0.91368	0.847057	0.894298
0.523854	0.47759	0.907421	0.343407	0.838881	0.151435	0.461266	0.0389724	0.238495	0.0403201	0.82752	0.959216	0.937585	0.169101	0.690436	0.495503	0.973985	0.956504	0.873354	0.95273	0.899974	0.786776	0.890932	0.832921	0.800772	0.901427	0.68028	0.905972	0.890931	0.306525	0.810849	0.327011	0.801117	0.841515	0.789194	0.928495	0.0825442	0.729856	0.879719	0.841576	0.936936	0.663107	0.842255	0.845279	0.67894	0.770513	0.417697	0.872864	0.875152	0.867827
0.541192	0.43063	0.947404	0.294456	0.871792	0.160436	0.442695	0.0124788	0.201912	0.010696	0.897091	0.961688	0.960356	0.0591142	0.747697	0.306982	0.964135	0.967447	0.93646	0.910071	0.905795	0.807022	0.93418	0.865153	0.806682	0.914342	0.680452	0.915133	0.912935	0.376157	0.834034	0.282718	0.86287	0.822718	0.887597	0.936012	0.0115225	0.519341	0.965063	0.860232	0.955904	0.744626	0.925445	0.838613	0.748733	0.762839	0.342764	0.951623	0.888424	0.90082
0.575232	0.497028	0.913652	0.185667	0.822119	0.199406	0.399328	0.0259087	0.191381	0.0330761	0.895972	0.963374	0.940295	0.0690913	0.730392	0.335881	0.969101	0.964608	0.894869	0.929622	0.867772	0.825963	0.938766	0.842172	0.799101	0.903589	0.649315	0.864041	0.888656	0.309211	0.812946	0.312321	0.842776	0.898438	0.890785	0.864764	0.0299205	0.618992	0.924217	0.868802	0.958304	0.669567	0.913521	0.840137	0.750414	0.77152	0.25026	0.90622	0.845844	0.901833
0.480423	0.544377	0.927632	0.315889	0.841796	0.135623	0.560479	0.0160941	0.235047	0.00735112	0.902802	0.957391	0.94804	0.062924	0.706325	0.5797	0.96265	0.967447	0.951307	0.907692	0.880367	0.860086	0.918673	0.85912	0.814675	0.914523	0.66982	0.929073	0.905189	0.331994	0.829785	0.307623	0.874612	0.895633	0.939213	0.932402	0.0106581	0.647105	0.938801	0.859666	0.92053	0.710433	0.909081	0.917092	0.854179	0.808526	0.320603	0.847332	0.848095	0.866327
0.619442	0.477696	0.922197	0.149763	0.884573	0.150033	0.544716	0.0272184	0.235203	0.0962544	0.848606	0.954256	0.932267	0.0788725	0.728097	0.602645	0.963242	0.960724	0.892826	0.922006	0.903188	0.82425	0.925558	0.816131	0.801523	0.907785	0.691347	0.918873	0.87778	0.343215	0.817725	0.245194	0.823042	0.908724	0.905773	0.839638	0.0499528	0.716124	0.966531	0.86971	0.935698	0.661401	0.882471	0.823713	0.733362	0.754515	0.211157	0.902104	0.84527	0.868059
0.471604	0.553743	0.950327	0.125823	0.857527	0.153289	0.451229	0.0201449	0.157563	0.0114523	0.863335	0.934083	0.971866	0.0155949	0.655355	0.648832	0.970393	0.963976	0.92586	0.930966	0.861467	0.842886	0.985782	0.830126	0.782737	0.936353	0.646013	0.893978	0.885233	0.340631	0.810472	0.244242	0.856159	0.593381	0.870261	0.903238	0.0188222	0.707772	0.912373	0.855264	0.967296	0.646848	0.885718	0.867607	0.767876	0.742986	0.279119	0.844923	0.84914	0.844512
0.571462	0.495611	0.887458	0.300791	0.786975	0.171025	0.426775	0.0548825	0.258121	0.0387995	0.733289	0.930752	0.873749	0.0888889	0.575117	0.518594	0.94392	0.92459	0.824755	0.905673	0.905381	0.733226	0.917995	0.784572	0.726303	0.843883	0.658157	0.907865	0.789833	0.422274	0.816492	0.231916	0.744037	0.823129	0.861436	0.793756	0.0369814	0.659827	0.926037	0.826243	0.950172	0.519327	0.767779	0.800608	0.641348	0.727378	0.330298	0.933467	0.856646	0.952765
0.542594	0.543349	0.908184	0.451113	0.84066	0.152639	0.394542	0.0220766	0.207245	0.0378029	0.853841	0.93797	0.953553	0.0593984	0.674665	0.607196	0.955606	0.953699	0.928181	0.921965	0.851896	0.763139	0.846706	0.788575	0.830733	0.908241	0.6408	0.911642	0.866202	0.233843	0.801683	0.283027	0.831905	0.798405	0.879012	0.868481	0.0255186	0.615577	0.922384	0.841931	0.955447	0.63736	0.90612	0.893429	0.784845	0.848455	0.320235	0.80568	0.760215	0.839943
0.427776	0.470408	0.926373	0.14097	0.885083	0.164546	0.497306	0.0145601	0.168019	0.0184234	0.912178	0.916943	0.944602	0.055376	0.701474	0.524292	0.957224	0.941231	0.864848	0.905813	0.862521	0.816203	0.856051	0.857037	0.793611	0.915876	0.657761	0.867782	0.841361	0.235306	0.794662	0.261983	0.860971	0.743004	0.908354	0.907111	0.0269587	0.694973	0.886026	0.839779	0.918199	0.654116	0.892394	0.895513	0.791491	0.775527	0.255611	0.843859	0.793772	0.847575
0.538735	0.404014	0.909989	0.149821	0.805193	0.177629	0.39457	0.0365389	0.230432	0.0230145	0.821692	0.93253	0.927209	0.114973	0.609081	0.577227	0.955148	0.911394	0.853787	0.890042	0.768184	0.763289	0.908881	0.788286	0.773705	0.876545	0.663126	0.874303	0.826197	0.267171	0.748077	0.279709	0.802426	0.808965	0.872632	0.89226	0.0546822	0.590578	0.920498	0.829529	0.927615	0.610965	0.833173	0.857642	0.597999	0.718073	0.321503	0.789824	0.799651	0.965986
0.525969	0.547334	0.935759	0.227929	0.805073	0.182786	0.498806	0.0493143	0.225188	0.0200151	0.78279	0.936067	0.894679	0.057266	0.704576	0.365602	0.937784	0.938436	0.933228	0.917456	0.856522	0.72414	0.874475	0.845109	0.79915	0.880232	0.681192	0.904423	0.831574	0.163491	0.799318	0.277902	0.807393	0.76505	0.879059	0.886062	0.0426618	0.567963	0.825319	0.779784	0.97505	0.606739	0.817115	0.785595	0.623921	0.720374	0.381318	0.875209	0.763036	0.897558
0.495188	0.644548	0.93155	0.274884	0.83313	0.182164	0.506708	0.047505	0.212099	0.0330501	0.764125	0.943495	0.931382	0.117898	0.62086	0.453862	0.959235	0.951517	0.896739	0.878293	0.784024	0.744562	0.888367	0.806935	0.754769	0.8833	0.665242	0.863983	0.827706	0.304199	0.787732	0.270419	0.793643	0.782391	0.871565	0.875011	0.0429535	0.646527	0.90185	0.830875	0.930341	0.633918	0.841141	0.893818	0.672997	0.707203	0.399536	0.884386	0.797242	0.922638
0.554607	0.514524	0.939516	0.298144	0.877428	0.163195	0.485414	0.0219531	0.192385	0.0255531	0.853543	0.95177	0.938761	0.0802102	0.637365	0.46981	0.970111	0.955355	0.8905	0.91092	0.872515	0.79138	0.861247	0.842787	0.803313	0.889711	0.68806	0.892234	0.87765	0.358678	0.799073	0.319407	0.811011	0.868497	0.913925	0.89576	0.0283516	0.532117	0.922944	0.842009	0.927962	0.699027	0.872558	0.897648	0.720814	0.751413	0.271059	0.818914	0.857988	0.893126
0.489166	0.622509	0.924022	0.214928	0.877291	0.137099	0.471976	0.0286195	0.215232	0.00688508	0.89454	0.953192	0.956378	0.0505364	0.730291	0.59535	0.949713	0.963822	0.888538	0.934423	0.885346	0.793173	0.90235	0.857097	0.835033	0.929864	0.6913	0.908492	0.906795	0.376374	0.804201	0.31062	0.857541	0.846305	0.895105	0.825845	0.0143044	0.41213	0.862783	0.809342	0.907163	0.780964	0.900947	0.900503	0.814136	0.801437	0.482996	0.693127	0.807381	0.894886
0.515743	0.300387	0.915179	0.203444	0.863872	0.144042	0.529114	0.0230026	0.177122	0.00799434	0.872385	0.940319	0.947108	0.0721917	0.732694	0.396183	0.968738	0.957619	0.871388	0.925399	0.870332	0.733429	0.888285	0.860949	0.820992	0.898165	0.6352	0.897202	0.893184	0.412096	0.809181	0.285288	0.838731	0.892483	0.881682	0.828397	0.0241481	0.695355	0.928498	0.805124	0.921416	0.763766	0.890777	0.744339	0.695028	0.763674	0.228972	0.805118	0.730483	0.909178
0.502975	0.489098	0.932508	0.16856	0.867084	0.161757	0.62824	0.0264655	0.203158	0.020735	0.838339	0.940941	0.944576	0.0731495	0.685578	0.617348	0.968949	0.950578	0.863397	0.923721	0.862985	0.83524	0.91198	0.84831	0.797158	0.914135	0.664452	0.915372	0.854723	0.18847	0.797053	0.287825	0.810915	0.795282	0.862227	0.914715	0.0389413	0.713112	0.935707	0.859969	0.95191	0.66435	0.882237	0.861002	0.754615	0.745963	0.413094	0.876052	0.826671	0.970446
0.430881	0.527455	0.932957	0.138769	0.817556	0.126729	0.675206	0.0520225	0.185326	0.0188547	0.84465	0.956264	0.968785	0.0433296	0.727298	0.549537	0.961832	0.97532	0.918937	0.926897	0.83349	0.807692	0.897112	0.837162	0.814931	0.929659	0.691	0.909191	0.881495	0.460205	0.808927	0.312453	0.869834	0.845221	0.883737	0.914094	0.0413212	0.3329	0.902764	0.794349	0.944332	0.645232	0.887978	0.679077	0.557852	0.815298	0.371303	0.913126	0.742977	0.869318
0.60929	0.459362	0.932227	0.105904	0.869172	0.160044	0.404961	0.0205417	0.268898	0.0377048	0.850758	0.967232	0.926052	0.0862003	0.637576	0.553568	0.958394	0.965951	0.915607	0.919316	0.92512	0.796513	0.909851	0.815261	0.865688	0.897235	0.677971	0.913352	0.876009	0.28749	0.814048	0.292075	0.830601	0.893886	0.888154	0.884994	0.0224752	0.692612	0.91903	0.842456	0.966891	0.714965	0.886128	0.838954	0.709098	0.810891	0.316662	0.865457	0.845444	0.938302
0.623711	0.554716	0.912895	0.225708	0.837398	0.122349	0.368141	0.025599	0.178896	0.0118639	0.887082	0.948733	0.94761	0.0462781	0.803763	0.586609	0.961972	0.970332	0.908787	0.909462	0.896646	0.81236	0.840918	0.844703	0.863512	0.896957	0.64124	0.915312	0.8784	0.471191	0.840169	0.296776	0.831323	0.923923	0.844444	0.919216	0.0607235	0.645267	0.905485	0.83148	0.934406	0.643238	0.911777	0.864072	0.778188	0.834634	0.318903	0.843326	0.804757	0.930196
0.476863	0.475883	0.939581	0.185433	0.854306	0.156604	0.41303	0.0333907	0.179339	0.0322243	0.860284	0.957452	0.95081	0.0874057	0.688077	0.463777	0.94632	0.968632	0.89922	0.917189	0.932955	0.836663	0.88829	0.876665	0.858628	0.922186	0.70092	0.920709	0.896281	0.179664	0.819134	0.269185	0.858758	0.865672	0.942911	0.854786	0.0216048	0.678126	0.841767	0.845283	0.986304	0.698591	0.929612	0.838186	0.731366	0.79483	0.291133	0.862216	0.876923	0.906915
0.564009	0.49996	0.913041	0.17226	0.87264	0.14329	0.51194	0.0410393	0.216586	0.0549859	0.876324	0.955122	0.934053	0.061899	0.72969	0.56531	0.988974	0.957427	0.821126	0.945135	0.952769	0.797588	0.916079	0.851774	0.843392	0.912111	0.664085	0.926072	0.846215	0.291129	0.813843	0.263449	0.817464	0.822581	0.867913	0.891557	0.0215578	0.638802	0.94647	0.872026	0.938919	0.665992	0.91148	0.830881	0.732625	0.755212	0.349834	0.854199	0.852287	0.921821
0.560148	0.427158	0.927137	0.216832	0.853676	0.10899	0.437914	0.0287662	0.214478	0.0586364	0.835936	0.962999	0.936213	0.0410472	0.703761	0.710247	0.943561	0.943468	0.877411	0.952225	0.91734	0.82935	0.936857	0.858933	0.830866	0.897655	0.677743	0.910945	0.842864	0.348862	0.854364	0.331729	0.841144	0.926916	0.944757	0.902958	0.0238597	0.614035	0.915493	0.859018	0.932847	0.716785	0.861614	0.785095	0.708211	0.740911	0.334251	0.856147	0.851766	0.896609
0.551656	0.475924	0.922356	0.27287	0.817992	0.139479	0.454733	0.0152419	0.199239	0.0200517	0.83932	0.937943	0.925742	0.0951221	0.617612	0.55664	0.958628	0.955039	0.881949	0.936147	0.725157	0.785151	0.915823	0.798536	0.82782	0.883269	0.695318	0.916128	0.844195	0.316748	0.840917	0.244638	0.823985	0.799172	0.854224	0.8661	0.0214164	0.657332	0.9068	0.837097	0.956936	0.682924	0.872476	0.886507	0.777313	0.766064	0.379109	0.848871	0.862543	0.904962
0.517726	0.339244	0.91743	0.119835	0.874189	0.133575	0.427244	0.0247473	0.203495	0.0136866	0.859736	0.933798	0.95366	0.0520656	0.71088	0.427955	0.963645	0.959113	0.906035	0.928863	0.875936	0.781056	0.901588	0.817781	0.810309	0.898638	0.677587	0.898219	0.882737	0.133729	0.797063	0.214999	0.850108	0.723238	0.869547	0.839687	0.0158746	0.604201	0.89283	0.82215	0.938568	0.641283	0.88119	0.890227	0.726936	0.774503	0.18896	0.890258	0.821679	0.877414
0.427734	0.341346	0.905772	0.219185	0.819364	0.218403	0.561784	0.0544769	0.193201	0.0470371	0.831223	0.939511	0.936559	0.0862195	0.738088	0.478137	0.950303	0.970977	0.847388	0.914681	0.870316	0.850524	0.94988	0.849541	0.853902	0.776973	0.699833	0.793062	0.893168	0.13712	0.795007	0.251618	0.866607	0.852832	0.870341	0.91403	0.0208542	0.677936	0.847243	0.846623	0.928959	0.679726	0.896824	0.721037	0.730917	0.734207	0.433139	0.765709	0.793774	0.868963
0.432783	0.495145	0.932095	0.247766	0.878577	0.132211	0.663638	0.0212756	0.190976	0.00892666	0.885569	0.957688	0.941393	0.073542	0.687681	0.56598	0.959919	0.975188	0.880248	0.959812	0.89055	0.83024	0.885286	0.850189	0.823614	0.892213	0.720367	0.920792	0.888513	0.222716	0.852898	0.310147	0.800194	0.843506	0.777125	0.879891	0.0605583	0.734389	0.880976	0.833255	0.956741	0.719497	0.887171	0.873533	0.771148	0.754176	0.285594	0.895267	0.863131	0.850425
0.632193	0.64159	0.906415	0.251237	0.849542	0.121813	0.492384	0.0242727	0.202294	0.0201235	0.898781	0.951044	0.952047	0.153728	0.687845	0.455836	0.972231	0.976353	0.910746	0.925892	0.893451	0.753306	0.81449	0.851064	0.878552	0.909164	0.693108	0.911927	0.8734	0.368477	0.796051	0.318398	0.841954	0.823245	0.834541	0.908557	0.0175759	0.680264	0.928624	0.857996	0.964066	0.635775	0.870262	0.834211	0.741517	0.683094	0.478782	0.872278	0.834133	0.939635
0.440501	0.767852	0.930039	0.184221	0.858609	0.155889	0.432989	0.0304209	0.227875	0.0162426	0.833439	0.956503	0.966691	0.0530554	0.724036	0.398844	0.964794	0.92742	0.876816	0.879023	0.882194	0.806003	0.966048	0.841513	0.823142	0.891562	0.701799	0.922676	0.861034	0.125127	0.838008	0.30698	0.904158	0.894472	0.839877	0.914344	0.0798895	0.454937	0.926075	0.842328	0.961042	0.641757	0.889334	0.780867	0.768982	0.784222	0.28884	0.662607	0.780697	0.848449
0.496927	0.653901	0.925757	0.143724	0.827111	0.140644	0.52905	0.0408542	0.225753	0.0335378	0.832182	0.947716	0.955866	0.0572911	0.664703	0.58973	0.973195	0.969099	0.908652	0.921735	0.924525	0.824038	0.951162	0.825112	0.799326	0.878281	0.66798	0.916286	0.851644	0.202643	0.850103	0.284859	0.875358	0.834379	0.802705	0.909506	0.0458005	0.434435	0.917653	0.812341	0.946071	0.687012	0.901179	0.783979	0.724409	0.694697	0.416401	0.914371	0.844444	0.894853
0.467222	0.58935	0.944507	0.232828	0.868501	0.160331	0.367797	0.059089	0.200576	0.0132092	0.804838	0.944009	0.940352	0.100191	0.598836	0.547979	0.972958	0.96106	0.900942	0.919669	0.943801	0.75922	0.965764	0.810024	0.81654	0.89113	0.707931	0.910227	0.851881	0.197125	0.810343	0.336044	0.824423	0.872622	0.91802	0.856146	0.0279625	0.62817	0.910227	0.833092	0.953573	0.615411	0.880232	0.858182	0.704343	0.668173	0.180187	0.9008	0.796417	0.895395
0.429616	0.499031	0.921842	0.139868	0.912046	0.130026	0.436425	0.0185624	0.199225	0.0128093	0.856314	0.939523	0.964928	0.0424823	0.719379	0.517486	0.978469	0.970961	0.963051	0.916071	0.85645	0.848871	0.963343	0.879553	0.862049	0.913259	0.667446	0.927277	0.899706	0.124568	0.840308	0.327408	0.841526	0.873211	0.872973	0.903087	0.0152449	0.611008	0.915772	0.858829	0.956689	0.705395	0.910824	0.886782	0.77393	0.623445	0.48526	0.938043	0.861223	0.897059
0.566561	0.511907	0.920566	0.280161	0.859326	0.154009	0.545084	0.0264193	0.246221	0.0130649	0.905502	0.955478	0.947463	0.0985609	0.707245	0.520231	0.978327	0.943591	0.931257	0.955924	0.897173	0.814375	0.92561	0.837983	0.835935	0.887728	0.738552	0.939783	0.847859	0.365765	0.838885	0.328426	0.856018	0.836937	0.925119	0.90157	0.0330523	0.719613	0.91383	0.856584	0.973968	0.693829	0.895078	0.872935	0.794331	0.801755	0.574703	0.868803	0.838415	0.830866
0.50923	0.502662	0.93469	0.195683	0.892681	0.153531	0.547011	0.0179467	0.210381	0.0154229	0.905971	0.958141	0.96858	0.0788502	0.666219	0.378608	0.97962	0.985413	0.904907	0.942224	0.966645	0.845054	0.901383	0.878262	0.848899	0.925121	0.748787	0.87675	0.91142	0.218443	0.816066	0.291389	0.826281	0.677149	0.917785	0.925118	0.0197368	0.719447	0.920204	0.915256	0.943261	0.734126	0.923575	0.884229	0.769921	0.836621	0.262046	0.740635	0.88289	0.921109
0.494449	0.567644	0.933801	0.31322	0.83032	0.137311	0.526304	0.0255841	0.237091	0.0224309	0.86294	0.947465	0.949515	0.065876	0.742592	0.596942	0.969394	0.978123	0.934196	0.949602	0.927114	0.85518	0.921621	0.822641	0.8324	0.8896	0.713286	0.906817	0.894933	0.371387	0.839017	0.264311	0.884723	0.862694	0.907328	0.902839	0.0346115	0.732763	0.87218	0.84257	0.950423	0.399555	0.913825	0.889893	0.81189	0.79006	0.405614	0.857384	0.890242	0.900662
0.930444	0.587877	0.903602	0.450896	0.823472	0.141126	0.352128	0.0603508	0.209295	0.0698984	0.792351	0.959407	0.929046	0.122655	0.61774	0.61492	0.97767	0.935905	0.802109	0.905858	0.932052	0.768124	0.932311	0.816382	0.760603	0.864839	0.724956	0.929285	0.836958	0.383193	0.819471	0.325528	0.779664	0.828642	0.832905	0.909254	0.0338212	0.717886	0.874671	0.883864	0.951722	0.678587	0.85737	0.889114	0.736959	0.786532	0.402163	0.950178	0.864619	0.828842
0.480116	0.5734	0.933377	0.213537	0.852461	0.134576	0.457724	0.017819	0.167947	0.0295214	0.881214	0.953845	0.958541	0.0843188	0.723755	0.426523	0.979736	0.968574	0.882889	0.927529	0.885771	0.837717	0.964303	0.851352	0.799248	0.928394	0.635869	0.885627	0.910075	0.295302	0.830206	0.262302	0.86642	0.923439	0.866935	0.908674	0.0264507	0.644305	0.932447	0.850468	0.960889	0.724392	0.903732	0.796304	0.780929	0.812005	0.604311	0.968909	0.839042	1
0.574155	0.495372	0.956831	0.197237	0.846905	0.135807	0.472479	0.0397849	0.199228	0.012342	0.908586	0.47694	0.962976	0.0631658	0.767167	0.498303	0.956003	0.983839	0.919757	0.93593	0.959269	0.861287	0.979563	0.866636	0.846206	0.922038	0.677548	0.920202	0.890445	0.129	0.86682	0.296767	0.849735	0.902824	0.923852	0.891283	0.0239879	0.680046	0.949088	0.851775	0.941424	0.702575	0.934089	0.872006	0.811118	0.803804	0.431194	0.8836	0.914488	0.955674
0.45695	0.590889	0.927457	0.128472	0.906638	0.137574	0.470401	0.0207044	0.226267	0	0.94052	0.947879	0.982091	0.061912	0.78287	0.572499	0.980834	0.980415	0.945768	0.954696	0.913503	0.813073	0.938711	0.869839	0.837721	0.912279	0.647274	0.89576	0.91718	0.203401	0.846225	0.311398	0.868016	0.88301	0.904431	0.893197	0.0235001	0.602117	0.939701	0.859502	0.958798	0.771299	0.933712	0.88329	0.805846	0.747984	0.385191	0.862635	0.896678	0.910015
0.479589	0.359158	0.942259	0.151208	0.885092	0.113898	0.501963	0.0343341	0.217011	0.0270041	0.86721	0.954642	0.956952	0.026241	0.773945	0.449913	0.966802	0.962513	0.937901	0.962318	0.93793	0.830473	0.974885	0.899874	0.833471	0.899181	0.635995	0.874811	0.884453	0.0801926	0.84882	0.291739	0.865114	0.914006	0.873126	0.879692	0.0430256	0.33362	0.928693	0.824846	0.961798	0.716591	0.889808	0.682743	0.773354	0.816065	0.475941	0.866547	0.838148	0.895009
0.46931	0.52451	0.925808	0.183102	0.905313	0.144501	0.42755	0.0120988	0.185506	0.00976378	0.939635	0.947143	0.972852	0.0484871	0.816705	0.622336	0.980662	0.978586	0.894315	0.951443	0.903363	0.820697	0.919289	0.910174	0.823009	0.938812	0.674142	0.87544	0.921659	0.274086	0.810874	0.253116	0.833827	0.819913	0.910883	0.906503	0.014369	0.719755	0.882381	0.856142	0.966634	0.764366	0.928606	0.79198	0.825809	0.812712	0.362327	0.876367	0.82728	0.869054
0.546521	0.575384	0.930831	0.298511	0.834717	0.195623	0.432148	0.0918167	0.254072	0.136096	0.835028	0.962185	0.892787	0.130221	0.69632	0.618562	0.963524	0.925704	0.889227	0.943753	0.943676	0.795152	0.945329	0.786848	0.802833	0.873106	0.712261	0.948122	0.871528	0.250367	0.838088	0.353247	0.81879	0.910135	0.865266	0.894878	0.0614853	0.759619	0.952847	0.863873	0.934811	0.63899	0.862629	0.917319	0.673641	0.770458	0.400544	0.895485	0.89679	0.912702
0.48689	0.439165	0.903868	0.17706	0.833638	0.183332	0.696063	0.0833037	0.230107	0.0290639	0.753811	0.956612	0.897043	0.13328	0.115452	0.569868	0.981016	0.948951	0.889603	0.919973	0.831392	0.77032	0.92435	0.783824	0.798726	0.836346	0.646472	0.888147	0.858729	0.130568	0.848308	0.311425	0.871274	0.899497	0.723666	0.912382	0.0582941	0.829873	0.887946	0.863886	0.961383	0.680853	0.831397	0.806531	0.577979	0.623213	0.500376	0.94946	0.795359	0.904908
0.498173	0.380048	0.92108	0.253798	0.866097	0.152711	0.575547	0.0520769	0.231867	0.0484679	0.828186	0.938838	0.931621	0.0760044	0.660634	0.542243	0.968088	0.969484	0.929653	0.940407	0.933054	0.789215	0.926395	0.81387	0.792948	0.86328	0.728845	0.915549	0.850328	0.264041	0.799661	0.295591	0.839754	0.904439	0.891892	0.905203	0.0599373	0.637163	0.899697	0.82271	0.957003	0.661298	0.865552	0.873411	0.670252	0.794455	0.338481	0.927386	0.815019	0.936642
0.531579	0.442995	0.933866	0.14522	0.85829	0.162783	0.506815	0.0266608	0.218764	0.00769035	0.865626	0.958663	0.947842	0.073657	0.728845	0.649911	0.95317	0.97049	0.899901	0.945009	0.955939	0.771338	0.909871	0.867779	0.810649	0.89375	0.685629	0.910406	0.873238	0.22894	0.816171	0.319137	0.803622	0.919345	0.942835	0.90826	0.01438	0.704122	0.925926	0.856787	0.948308	0.714323	0.892333	0.905286	0.742571	0.711244	0.289564	0.868291	0.843909	0.952408
0.533708	0.502268	0.951391	0.271093	0.90246	0.127895	0.607025	0.0179635	0.279069	0.00651498	0.890453	0.954726	0.980416	0.0654604	0.763452	0.607093	0.985433	0.974587	0.940599	0.969688	0.929522	0.859426	0.928553	0.873026	0.865939	0.930415	0.720477	0.92577	0.913082	0.426677	0.845465	0.293791	0.852182	0.92924	0.925316	0.870742	0.0182806	0.689948	0.939338	0.864542	0.945467	0.775052	0.914468	0.76832	0.800121	0.772845	0.29121	0.928608	0.846934	0.989356
0.53488	0.475576	0.908284	0.262153	0.868385	0.165711	0.491292	0.0238168	0.203445	0.0176467	0.849673	0.948023	0.940223	0.0698047	0.716047	0.520792	0.963853	0.949868	0.89226	0.906068	0.840647	0.751359	0.875119	0.828916	0.820359	0.920496	0.620764	0.902146	0.910729	0.15372	0.814003	0.258128	0.806872	0.876841	0.905495	0.87565	0.0412445	0.688675	0.948492	0.843391	0.942925	0.681918	0.848532	0.910573	0.772375	0.774678	0.320416	0.776123	0.82765	0.901452
0.533491	0.540659	0.927787	0.294826	0.857558	0.146015	0.395276	0.0156906	0.240413	0.023921	0.870685	0.945368	0.955508	0.115606	0.685428	0.517765	0.968406	0.958524	0.909642	0.932865	0.890663	0.805055	0.94184	0.867272	0.810469	0.908008	0.684407	0.90595	0.892155	0.167444	0.860156	0.255629	0.852118	0.886173	0.930993	0.894444	0.017814	0.658158	0.904544	0.843927	0.943329	0.700656	0.900247	0.867029	0.714945	0.779863	0.334456	0.817837	0.864342	0.931607
0.443574	0.547182	0.899946	0.291695	0.840274	0.166947	0.531246	0.0998991	0.219957	0.0205979	0.819639	0.957222	0.912639	0.0857837	0.66323	0.580879	0.970418	0.929531	0.8734	0.894795	0.863081	0.773642	0.921939	0.800131	0.748558	0.872885	0.689565	0.916093	0.865315	0.438689	0.806339	0.325879	0.79918	0.812358	0.875964	0.883001	0.0440933	0.608482	0.990489	0.814535	0.94801	0.611532	0.845118	0.88267	0.753091	0.738627	0.373935	0.925568	0.824753	0.892998
0.564	0.403839	0.916922	0.302938	0.860882	0.164983	0.482643	0.0235927	0.247416	0.0460724	0.872216	0.959305	0.952422	0.0769764	0.67493	0.59168	0.970915	0.949938	0.905226	0.943044	0.925094	0.771782	0.939339	0.839781	0.821344	0.887348	0.675648	0.918171	0.896097	0.485539	0.839824	0.329528	0.86206	0.920983	0.882423	0.89991	0.0353226	0.552589	0.923077	0.848281	0.969729	0.714572	0.889159	0.903556	0.781876	0.804191	0.246637	0.940124	0.877956	0.904813
0.501212	0.447997	0.94657	0.27288	0.879142	0.120782	0.530686	0.0183951	0.205147	0.00427008	0.888751	0.953468	0.957826	0.0694491	0.706289	0.546529	0.980259	0.966059	0.851296	0.928468	0.916516	0.788781	0.88301	0.870817	0.82584	0.90753	0.662127	0.927747	0.886883	0.21629	0.813833	0.315594	0.871969	0.837613	0.877793	0.88044	0.0219893	0.761263	0.915344	0.887772	0.966418	0.709307	0.918341	0.83921	0.825841	0.789177	0.458115	0.907927	0.889201	0.893016
0.46516	0.428992	0.922473	0.237073	0.850159	0.134493	0.468291	0.0193369	0.209692	0.0116428	0.854656	0.948009	0.971401	0.0726796	0.719516	0.632	0.949322	0.967969	0.935403	0.925724	0.963351	0.796869	0.929442	0.876017	0.837101	0.889836	0.716136	0.911123	0.888415	0.116968	0.850654	0.273798	0.891991	0.824722	0.884822	0.878322	0.031095	0.684704	0.876207	0.813026	0.944769	0.743981	0.883716	0.887064	0.680651	0.710053	0.237673	0.812763	0.820974	0.917521
0.384812	0.827432	0.900791	0.240442	0.842153	0.159932	0.149391	0.0472418	0.228388	0.0273177	0.877555	0.944352	0.939251	0.0682399	0.748111	0.521204	0.943769	0.942531	0.882671	0.926236	0.949642	0.845828	0.930528	0.836101	0.80155	0.889988	0.69006	0.906814	0.853386	0.110564	0.816945	0.325914	0.805651	0.863533	0.931338	0.877761	0.0288231	0.387698	0.803144	0.780291	0.96278	0.715328	0.88007	0.705074	0.625587	0.802242	0.171988	0.923928	0.823701	0.969829
0.462886	0.520959	0.921704	0.189011	0.816804	0.184211	0.468967	0.054267	0.204343	0.0311406	0.786694	0.949899	0.922682	0.0768116	0.603617	0.624239	0.976189	0.940426	0.860429	0.954175	0.846235	0.758696	0.875165	0.802118	0.772303	0.881742	0.664477	0.903932	0.841872	0.287738	0.812719	0.248187	0.7823	0.736272	0.840879	0.881838	0.0856394	0.723907	0.929734	0.85609	0.944558	0.535194	0.860614	0.81773	0.568185	0.749057	0.395881	0.948423	0.809228	0.932271
0.504361	0.526186	0.935009	0.173631	0.824113	0.144467	0.41232	0.0425275	0.235266	0.0620868	0.774453	0.921086	0.935375	0.0467863	0.694857	0.597068	0.970762	0.955477	0.900169	0.926656	0.915606	0.823713	0.900212	0.839736	0.797523	0.880977	0.694578	0.91393	0.850476	0.364654	0.785868	0.301792	0.819971	0.872828	0.779458	0.922808	0.0393981	0.480484	0.892525	0.835689	0.934151	0.58413	0.896154	0.897142	0.718198	0.795106	0.256987	0.885608	0.80588	0.983721
0.545796	0.457592	0.928883	0.26494	0.880111	0.194303	0.465052	0.0220606	0.188621	0.00496451	0.878905	0.948522	0.962214	0.0583454	0.79609	0.336104	0.967685	0.979611	0.903637	0.952311	0.92327	0.837298	0.917319	0.85963	0.892976	0.895734	0.663377	0.904671	0.914339	0.165768	0.83014	0.343349	0.857067	0.923009	0.846567	0.915285	0.0145768	0.587343	0.894235	0.849469	0.963495	0.782363	0.919472	0.844546	0.79391	0.729363	0.118626	0.756084	0.842971	0.928997
0.268804	0.349742	0.929435	0.0953548	0.761899	0.136084	0.400919	0.015023	0.202918	0.0160169	0.855548	0.960483	0.961056	0.0521866	0.76382	0.419081	0.971623	0.971576	0.879724	0.904206	0.915954	0.856849	0.906475	0.856893	0.854432	0.905891	0.755887	0.931944	0.879327	0.112161	0.801022	0.314328	0.869926	0.912987	0.83576	0.733312	0.0193816	0.570188	0.82729	0.798135	0.954576	0.784854	0.910985	0.87053	0.801212	0.781426	0.146622	0.757369	0.75239	0.872236
0.786164	0.287763	0.950829	0.173431	0.913061	0.177331	0.709555	0.0171294	0.397822	0.00525958	0.916545	0.95201	0.96317	0.0331264	0.698243	0.711807	0.954821	0.972992	0.923744	0.960794	0.949014	0.865027	0.886761	0.892645	0.8902	0.930048	0.751741	0.927104	0.899158	0.13679	0.835689	0.311783	0.844062	0.789279	0.875892	0.932218	0.0336191	0.773549	0.846187	0.899331	0.953955	0.756194	0.903804	0.917083	0.847815	0.819762	0.484544	0.967213	0.826247	0.929511
0.536809	0.451864	0.915185	0.155957	0.867291	0.178162	0.433647	0.035654	0.207185	0.0245847	0.843945	0.952881	0.947134	0.0530377	0.663926	0.620563	0.967826	0.953914	0.854709	0.926255	0.801963	0.835433	0.80903	0.862941	0.809433	0.93667	0.664579	0.882209	0.879641	0.228633	0.785127	0.306057	0.824018	0.792889	0.837209	0.885251	0.0284698	0.596283	0.933892	0.832796	0.939587	0.676238	0.864507	0.859613	0.673569	0.724671	0.280564	0.858083	0.71037	0.848168
0.538434	0.47846	0.942304	0.185412	0.845659	0.146032	0.490286	0.0146474	0.156655	0.0108979	0.886219	0.95847	0.952507	0.0581654	0.655998	0.562893	0.966875	0.952841	0.912642	0.948352	0.884996	0.793503	0.918589	0.830813	0.726211	0.91992	0.66129	0.902016	0.860299	0.246691	0.766468	0.249628	0.863751	0.727273	0.876176	0.925543	0.0290558	0.66191	0.943316	0.831407	0.915372	0.684754	0.883755	0.925967	0.823128	0.752642	0.288911	0.745988	0.834499	0.895122
0.488673	0.451893	0.916123	0.179546	0.833136	0.167609	0.456396	0.0384333	0.203574	0.0488794	0.838163	0.938727	0.921676	0.0713442	0.56559	0.51473	0.976821	0.953582	0.904272	0.89773	0.916036	0.813733	0.868176	0.848233	0.773545	0.855386	0.683031	0.896977	0.882037	0.406617	0.797574	0.219995	0.786377	0.871993	0.830349	0.873975	0.0396437	0.598787	0.95392	0.819438	0.928919	0.536734	0.845062	0.757309	0.582298	0.703994	0.474298	0.928599	0.821795	0.930353
0.489243	0.468613	0.926563	0.186835	0.842112	0.159078	0.496445	0.0568988	0.205269	0.047336	0.831133	0.946001	0.937751	0.0941038	0.693915	0.615785	0.968484	0.948798	0.882757	0.954962	0.884029	0.780638	0.910178	0.796607	0.802922	0.878554	0.702487	0.89869	0.834321	0.0754163	0.804026	0.253859	0.808735	0.861742	0.787126	0.892695	0.041738	0.587964	0.916306	0.836569	0.942556	0.660854	0.877347	0.802268	0.653228	0.750192	0.210422	0.813992	0.810009	0.898269
0.584488	0.495096	0.927994	0.256271	0.89169	0.144756	0.601949	0.0263244	0.203394	0.0159643	0.906683	0.961591	0.963867	0.056356	0.712594	0.470403	0.972427	0.962699	0.930368	0.891748	0.836278	0.837794	0.962189	0.866987	0.849065	0.90853	0.718333	0.915862	0.886696	0.0899555	0.814226	0.302446	0.850024	0.713438	0.822236	0.892763	0.0280965	0.643564	0.973338	0.835654	0.953275	0.657838	0.887694	0.923399	0.804317	0.76607	0.219339	0.853331	0.834848	0.880528
0.469939	0.501652	0.915605	0.296476	0.823053	0.135961	0.604335	0.0471354	0.208724	0.0574099	0.796328	0.951829	0.938793	0.0640555	0.638953	0.423228	0.970735	0.955052	0.848426	0.893529	0.901645	0.804878	0.871739	0.794493	0.805913	0.873245	0.680944	0.899328	0.876917	0.167602	0.795467	0.304693	0.815097	0.819417	0.724628	0.899832	0.0284346	0.631722	0.957069	0.866171	0.93633	0.641899	0.843631	0.906129	0.735746	0.756514	0.342872	0.912178	0.833005	0.945179
0.572199	0.440968	0.954919	0.324292	0.860476	0.161014	0.631065	0.0198007	0.22997	0.00967408	0.884035	0.940669	0.964115	0.0565422	0.69801	0.601169	0.972093	0.969158	0.905359	0.897323	0.884179	0.805676	0.95689	0.820402	0.804318	0.914432	0.676739	0.903827	0.897114	0.217358	0.82351	0.311091	0.856984	0.836747	0.857939	0.923045	0.0106843	0.688049	0.941592	0.856872	0.947297	0.711706	0.89265	0.787356	0.780803	0.609263	0.347751	0.760288	0.838597	0.86969
0.541898	0.479493	0.92249	0.247415	0.842144	0.164157	0.48637	0.0258953	0.219111	0.0509213	0.838869	0.951311	0.929093	0.108421	0.666779	0.413755	0.953001	0.934133	0.881773	0.924478	0.889634	0.811459	0.9513	0.858118	0.807454	0.879794	0.679382	0.897863	0.833765	0.198723	0.801517	0.312511	0.819546	0.870418	0.822376	0.828851	0.016347	0.61721	0.897471	0.843929	0.917976	0.657329	0.849812	0.902748	0.761216	0.714862	0.331975	0.79502	0.813406	0.885714
0.545765	0.4716	0.921558	0.314461	0.876359	0.181245	0.48103	0.14219	0.295628	0.204791	0.78861	0.93683	0.914631	0.14174	0.596682	0.571752	0.962888	0.946775	0.893704	0.913673	0.89767	0.77148	0.932879	0.762212	0.780666	0.882351	0.694582	0.91543	0.843216	0.262835	0.780877	0.357411	0.8534	0.867899	0.959222	0.885939	0.155558	0.520777	0.87204	0.850679	0.954108	0.722348	0.820487	0.871862	0.742118	0.784952	0.476311	0.881565	0.807964	0.901455
0.563788	0.463516	0.936361	0.27222	0.845096	0.190841	0.51157	0.0307765	0.207882	0.0187295	0.792482	0.935488	0.929187	0.0835379	0.615471	0.602883	0.960375	0.95535	0.874651	0.917225	0.920416	0.730722	0.937001	0.807712	0.790559	0.88887	0.688721	0.915711	0.864618	0.354835	0.787592	0.359379	0.829418	0.881383	0.845472	0.863893	0.0693988	0.616729	0.95845	0.828564	0.925095	0.61749	0.831473	0.84269	0.685094	0.791428	0.588245	0.893311	0.733653	0.955782
0.557109	0.515927	0.935957	0.173229	0.874889	0.165517	0.521883	0.0179709	0.205259	0.00425357	0.825348	0.942227	0.964014	0.0916631	0.731197	0.642241	0.96396	0.9689	0.940465	0.955021	0.89797	0.78304	0.957046	0.84646	0.834582	0.901033	0.649643	0.907201	0.893331	0.28439	0.803807	0.312942	0.85013	0.852178	0.900591	0.875053	0.024194	0.742034	0.905864	0.832388	0.962988	0.681765	0.886284	0.805437	0.760748	0.712919	0.258846	0.870566	0.795376	0.919762
0.510294	0.552284	0.946886	0.267997	0.901847	0.0924658	0.6253	0.0102435	0.224347	0.0180317	0.909295	0.942608	0.974159	0.114334	0.745797	0.606132	0.972034	0.970285	0.936667	0.953524	0.910153	0.841271	0.911336	0.854911	0.805671	0.935959	0.59926	0.89974	0.842549	0.32893	0.833683	0.235233	0.883492	0.723005	0.935359	0.903648	0.0131678	0.676498	0.967816	0.876901	0.957341	0.768403	0.911069	0.902183	0.866879	0.802375	0.398423	0.934174	0.873437	0.924989
0.493729	0.582674	0.928696	0.358404	0.839633	0.210103	0.476394	0.0543412	0.204491	0.0302701	0.782568	0.96213	0.951932	0.087003	0.722472	0.700494	0.963874	0.944117	0.871742	0.932266	0.86794	0.815439	0.912169	0.79848	0.775372	0.888539	0.676926	0.866261	0.839149	0.50165	0.79757	0.246959	0.882189	0.830769	0.880357	0.908828	0.023251	0.754066	0.957265	0.792064	0.944559	0.62191	0.872438	0.923262	0.715848	0.785748	0.541766	0.915402	0.882451	0.855045
0.494156	0.47834	0.923118	0.400055	0.876669	0.170378	0.461489	0.0230893	0.219737	0.0429919	0.880351	0.951099	0.964507	0.0889896	0.723992	0.495081	0.959751	0.982338	0.922612	0.951872	0.849522	0.80861	0.89422	0.868152	0.824817	0.945153	0.69798	0.92549	0.924164	0.102943	0.831254	0.280505	0.867601	0.876044	0.783133	0.901485	0.0351837	0.572342	0.928874	0.862392	0.932538	0.658038	0.885213	0.864887	0.778561	0.824312	0.261527	0.837809	0.859934	0.938834
0.514392	0.531471	0.945997	0.197613	0.877971	0.141573	0.365157	0.0156382	0.211184	0.0049862	0.889584	0.943725	0.959489	0.0881982	0.755543	0.596075	0.954234	0.972317	0.891414	0.922272	0.853186	0.838082	0.89661	0.8595	0.837332	0.872501	0.63179	0.918453	0.899844	0.162064	0.845041	0.256848	0.87012	0.826546	0.766075	0.908998	0.0168767	0.659355	0.899575	0.858268	0.967634	0.754045	0.889901	0.833652	0.735821	0.805436	0.281938	0.868342	0.855486	0.935844
0.443548	0.422441	0.915748	0.263286	0.891271	0.132689	0.417491	0.0123464	0.195594	0.011584	0.847861	0.946817	0.952944	0.0538529	0.738046	0.612664	0.968791	0.971366	0.949099	0.935484	0.903313	0.799042	0.916302	0.849683	0.816693	0.913797	0.725867	0.901593	0.88311	0.0993228	0.772853	0.280694	0.842144	0.836913	0.931818	0.849695	0.0194809	0.68053	0.925598	0.813536	0.960449	0.756077	0.895432	0.861927	0.797737	0.745361	0.347539	0.767749	0.821736	0.961095
0.554124	0.509105	0.908979	0.235816	0.847723	0.147556	0.479798	0.0281774	0.19993	0.0282628	0.837326	0.950038	0.931755	0.0792273	0.691694	0.569953	0.955494	0.969235	0.833855	0.927022	0.945622	0.806561	0.936697	0.847106	0.79793	0.906966	0.709141	0.905629	0.851617	0.173325	0.824768	0.290686	0.806493	0.872766	0.959531	0.827244	0.00629363	0.665732	0.937103	0.819225	0.959696	0.652094	0.862933	0.889707	0.699472	0.75474	0.436711	0.914271	0.844821	0.87752
0.453115	0.408812	0.945697	0.351596	0.844169	0.119936	0.482266	0.0200223	0.162593	0.0148323	0.827552	0.956506	0.956416	0.085636	0.691448	0.571236	0.984509	0.972996	0.905952	0.906707	0.819332	0.855687	0.907852	0.867377	0.829394	0.911052	0.687298	0.900018	0.904974	0.241482	0.819172	0.270308	0.851613	0.954545	1	0.910788	0.0180484	0.682025	0.935978	0.822541	0.957495	0.739296	0.898405	0.723175	0.699081	0.799533	0.323092	0.868481	0.813328	0.9019
0.530826	0.498431	0.934485	0.308831	0.892723	0.160601	0.479566	0.00870759	0.149162	0.00769066	0.87731	0.96552	0.952091	0.0604106	0.686399	0.607755	0.980456	0.976721	0.879454	0.943093	0.928413	0.815425	0.927939	0.865304	0.824966	0.884734	0.677263	0.917363	0.889422	0.385025	0.750288	0.303755	0.828875	0.825866	0.851213	0.915385	0.0658544	0.6934	0.919699	0.856205	0.965918	0.668052	0.892689	0.884168	0.757514	0.75091	0.367394	0.911596	0.920684	0.935095
0.434649	0.395354	0.90056	0.178674	0.810027	0.151681	0.399007	0.0580861	0.1888	0.0608555	0.850161	0.938344	0.951957	0.0974697	0.64812	0.677436	0.958944	0.954306	0.908806	0.889959	0.936964	0.765097	0.956413	0.818707	0.785487	0.879815	0.68004	0.88668	0.827851	0.293159	0.80856	0.244893	0.802502	0.862197	0.884892	0.892219	0.137229	0.718345	0.899231	0.83006	0.956699	0.614345	0.872468	0.848645	0.742404	0.694575	0.387781	0.85708	0.837756	0.956324
0.677383	0.595425	0.907319	0.164871	0.832996	0.18947	0.494084	0.0441454	0.184275	0.0595159	0.825281	0.953627	0.929877	0.0997548	0.63827	0.439608	0.969344	0.93347	0.924566	0.923384	0.904949	0.8061	0.905424	0.842481	0.746547	0.856883	0.708038	0.922769	0.823876	0.265658	0.827071	0.266259	0.848247	0.903166	0.89392	0.860612	0.0445613	0.640414	0.948245	0.808244	0.958506	0.584721	0.851595	0.801374	0.613346	0.800719	0.336	0.93707	0.879911	0.95756
0.489006	0.418106	0.93677	0.21664	0.84395	0.188076	0.611071	0.0244759	0.18595	0.0154717	0.834434	0.959155	0.943413	0.0556744	0.693184	0.463171	0.96788	0.955729	0.919235	0.94989	0.927951	0.799636	0.950213	0.866223	0.808583	0.868938	0.719346	0.862777	0.86276	0.183214	0.806185	0.250978	0.819608	0.91498	0.834839	0.887154	0.0192873	0.634567	0.959302	0.826338	0.963846	0.613682	0.876853	0.892768	0.810565	0.7634	0.289884	0.776479	0.84907	0.971761
0.60412	0.284577	0.927991	0.137411	0.783511	0.15582	0.37768	0.0333333	0.176085	0.0226461	0.83095	0.946729	0.918706	0.0420497	0.722742	0.395903	0.952076	0.964735	0.897971	0.943631	0.887176	0.826043	0.938626	0.82829	0.799283	0.949954	0.698368	0.891733	0.888936	0.0948785	0.81173	0.285092	0.878178	0.805187	0.855572	0.922408	0.0281335	0.82968	0.926807	0.769194	0.942897	0.7164	0.889796	0.842508	0.712792	0.790104	0.434557	0.869508	0.820974	0.88993
0.514307	0.525311	0.944379	0.230861	0.841326	0.177438	0.464149	0.0433012	0.217654	0.0591602	0.787308	0.941142	0.936772	0.0677859	0.576239	0.484367	0.967695	0.95808	0.90254	0.930507	0.946631	0.775689	0.895159	0.824031	0.807648	0.903191	0.713081	0.897121	0.847774	0.14285	0.772694	0.284111	0.785861	0.916013	0.913165	0.862482	0.0464249	0.572454	0.936428	0.869811	0.952626	0.569273	0.849636	0.900472	0.711319	0.811101	0.39653	0.88699	0.846241	0.954336
0.467669	0.510753	0.917395	0.14204	0.851985	0.146816	0.443036	0.00992632	0.20328	0.00817375	0.831941	0.946606	0.947482	0.0421598	0.634718	0.500842	0.964343	0.968972	0.878995	0.949822	0.858916	0.818127	0.928517	0.851149	0.796197	0.887557	0.691354	0.893971	0.887045	0.150522	0.783784	0.262233	0.841253	0.809648	0.841512	0.85853	0.0182568	0.525288	0.952475	0.853919	0.961448	0.658819	0.852276	0.780972	0.71199	0.683975	0.308582	0.870761	0.816203	0.93553
0.546098	0.440034	0.913909	0.348979	0.910935	0.152255	0.654051	0.0152226	0.173777	0.0146808	0.881871	0.928251	0.948774	0.0613596	0.671049	0.585032	0.967592	0.968659	0.9385	0.961115	0.905214	0.766088	0.911444	0.863007	0.815849	0.909765	0.726303	0.714545	0.885509	0.127379	0.832526	0.292466	0.877291	0.885064	0.935432	0.89593	0.0275661	0.422427	0.911175	0.865798	0.97032	0.724644	0.884861	0.916107	0.811386	0.803249	0.410127	0.891842	0.834179	0.8856
0.468151	0.516137	0.872429	0.246791	0.815628	0.19277	0.454307	0.0736855	0.159714	0.0521045	0.768395	0.940068	0.883122	0.0823408	0.587143	0.578856	0.943123	0.929872	0.817293	0.916141	0.867724	0.76097	0.886674	0.785994	0.795089	0.845622	0.66985	0.90193	0.867414	0.253184	0.822354	0.256474	0.728501	0.730071	0.858263	0.869665	0.0441865	0.72654	0.873503	0.810181	0.911005	0.57987	0.865841	0.855631	0.631091	0.748499	0.227457	0.857615	0.777293	0.825606
0.427768	0.484954	0.858925	0.191492	0.834172	0.174437	0.408619	0.045128	0.140217	0.0141344	0.818894	0.936106	0.894431	0.0778011	0.649208	0.442077	0.940817	0.944142	0.877145	0.90479	0.906473	0.776074	0.911231	0.849163	0.775174	0.864245	0.638178	0.925402	0.865524	0.267396	0.755861	0.30484	0.836277	0.80204	0.877958	0.841031	0.025723	0.610187	0.889588	0.82191	0.93206	0.625911	0.846909	0.764677	0.694981	0.742953	0.284535	0.81456	0.811592	0.871655
0.564614	0.494809	0.899069	0.326188	0.793295	0.169035	0.438951	0.0476049	0.138579	0.0435836	0.82834	0.920467	0.902274	0.0779412	0.700661	0.551236	0.943146	0.93211	0.910449	0.894986	0.867923	0.745045	0.898139	0.813028	0.820435	0.854321	0.690657	0.898708	0.792124	0.319844	0.762726	0.341556	0.778058	0.888627	0.803232	0.856586	0.0224432	0.543498	0.863971	0.811822	0.93913	0.611508	0.864351	0.84125	0.67451	0.7277	0.283127	0.839305	0.786675	0.902513
0.465049	0.431938	0.920044	0.176446	0.857212	0.166536	0.417975	0.0465724	0.150933	0.0251642	0.801918	0.927633	0.913504	0.0572611	0.620682	0.570427	0.96209	0.947834	0.830642	0.922579	0.911323	0.765171	0.812092	0.846253	0.80907	0.852062	0.615991	0.930521	0.868008	0.114812	0.802454	0.269671	0.710486	0.847063	0.703606	0.883628	0.0259753	0.583307	0.825109	0.842773	0.94496	0.6286	0.867385	0.85182	0.709665	0.768306	0.194335	0.834339	0.85986	0.715787
0.458756	0.474394	0.861786	0.25961	0.811682	0.179842	0.430851	0.0828464	0.137141	0.0364615	0.793944	0.917284	0.880835	0.0631099	0.548893	0.50202	0.940779	0.810456	0.844848	0.844796	0.838362	0.739312	0.885332	0.794576	0.790174	0.850838	0.673993	0.887503	0.831155	0.18924	0.773366	0.302782	0.790116	0.819784	0.819629	0.816115	0.0576733	0.543124	0.878881	0.808446	0.931546	0.623807	0.844166	0.851521	0.646708	0.709601	0.351098	0.910325	0.762584	0.804952
0.415093	0.508866	0.888485	0.303756	0.820782	0.165252	0.400295	0.0556471	0.133949	0.0209242	0.856433	0.928373	0.92055	0.0529651	0.700106	0.649738	0.956375	0.923123	0.879877	0.924315	0.915869	0.78356	0.8975	0.807865	0.793115	0.861521	0.637952	0.907543	0.85623	0.218105	0.763841	0.325771	0.825183	0.819924	0.856791	0.86326	0.0271761	0.572946	0.828332	0.791291	0.918822	0.653688	0.844911	0.839503	0.719365	0.750543	0.263906	0.796263	0.764888	0.801137
0.487269	0.546375	0.835932	0.299864	0.79331	0.205405	0.251161	0.0758459	0.17624	0.0501526	0.738172	0.925065	0.875925	0.0831557	0.61575	0.556458	0.925307	0.881006	0.810781	0.922702	0.89926	0.719163	0.89019	0.792403	0.742881	0.840237	0.633121	0.895921	0.794469	0.161666	0.768297	0.247362	0.73567	0.807864	0.82099	0.730968	0.0372506	0.606749	0.856059	0.774605	0.925757	0.585002	0.806197	0.743255	0.600319	0.675608	0.258346	0.78184	0.718965	0.865399
0.589104	0.47984	0.874593	0.139606	0.795767	0.159389	0.399529	0.0338719	0.15679	0.0238441	0.788021	0.931721	0.928028	0.048892	0.659522	0.574775	0.951192	0.928667	0.901366	0.922556	0.835435	0.703591	0.883778	0.824605	0.799075	0.852927	0.640903	0.834485	0.86761	0.306695	0.766697	0.265045	0.796736	0.820954	0.81747	0.769368	0.032209	0.655483	0.835275	0.749115	0.955763	0.643929	0.85403	0.813678	0.708819	0.673604	0.354554	0.822622	0.739036	0.851058
0.456299	0.548277	0.895217	0.14406	0.801299	0.171809	0.412503	0.0897649	0.151431	0.0609017	0.773483	0.924078	0.85946	0.0787218	0.618136	0.47115	0.952562	0.891678	0.853028	0.87677	0.862787	0.738561	0.849097	0.810027	0.78292	0.862059	0.669753	0.909034	0.82118	0.136132	0.745343	0.324567	0.785933	0.856926	0.81178	0.816664	0.0323702	0.540817	0.861299	0.804875	0.921664	0.579046	0.847689	0.793391	0.689364	0.639725	0.216976	0.863107	0.720229	0.846619
0.479542	0.464481	0.894513	0.221621	0.864858	0.139835	0.350594	0.03282	0.081867	0.0176798	0.842111	0.962236	0.935121	0.0491425	0.642747	0.390906	0.970442	0.953595	0.780501	0.896641	0.854955	0.860701	0.803326	0.868987	0.839499	0.93085	0.654252	0.92648	0.874897	0.334424	0.794012	0.20855	0.801355	0.680769	0.553701	0.883086	0.0354046	0.653838	0.832362	0.859944	0.905052	0.646847	0.907476	0.893583	0.707033	0.810009	0.257516	0.859224	0.791947	0.556943
0.459214	0.4513	0.898269	0.252496	0.823004	0.182911	0.430846	0.0278004	0.147232	0.0214652	0.803172	0.929813	0.930415	0.0526167	0.680514	0.591165	0.960642	0.91831	0.885708	0.926475	0.847613	0.790852	0.897337	0.834766	0.807621	0.891446	0.69708	0.876783	0.882927	0.24251	0.773255	0.275963	0.779932	0.94813	0.866879	0.844805	0.0405611	0.681853	0.878912	0.809479	0.94396	0.650382	0.830097	0.831742	0.674437	0.743033	0.372095	0.910145	0.783782	0.823583
0.394143	0.420019	0.88308	0.331248	0.817761	0.173592	0.552473	0.0257253	0.148436	0.013744	0.852123	0.926067	0.911096	0.0628992	0.610237	0.425965	0.954629	0.943842	0.805301	0.906434	0.884567	0.778263	0.862453	0.816633	0.816818	0.865565	0.640551	0.885672	0.86716	0.214681	0.751543	0.302402	0.845075	0.844515	0.835634	0.841001	0.028058	0.621064	0.891077	0.803503	0.946509	0.668276	0.865698	0.730386	0.702756	0.753274	0.303607	0.790797	0.783781	0.822602
0.4319	0.514916	0.909619	0.154127	0.812264	0.175166	0.459822	0.0216214	0.149365	0.0196805	0.869382	0.919228	0.916999	0.0592112	0.65065	0.402148	0.97209	0.951119	0.89519	0.925566	0.861486	0.81875	0.919355	0.830983	0.792782	0.881335	0.674916	0.903787	0.850206	0.189498	0.793323	0.290499	0.819627	0.79885	0.848869	0.819401	0.0283099	0.648523	0.852228	0.812034	0.929741	0.649257	0.873374	0.83196	0.68236	0.76631	0.332593	0.841295	0.770569	0.751197
0.536897	0.424272	0.867236	0.342963	0.804252	0.288652	0.427948	0.0698697	0.125938	0.0329294	0.714585	0.910761	0.868852	0.101738	0.641504	0.500227	0.932204	0.91642	0.806805	0.888286	0.830465	0.711108	0.859778	0.812381	0.727088	0.858931	0.639842	0.871647	0.811488	0.204767	0.638356	0.298937	0.779472	0.721048	0.762869	0.862787	0.0266775	0.553087	0.88103	0.79933	0.916051	0.523495	0.824889	0.794018	0.626003	0.653624	0.34008	0.81675	0.733599	0.796223
0.479908	0.456571	0.866997	0.17278	0.823485	0.165807	0.38094	0.0287629	0.167333	0.0262541	0.837455	0.918222	0.889751	0.0822235	0.659951	0.585746	0.963691	0.930372	0.932126	0.881537	0.822533	0.799977	0.830287	0.795881	0.772243	0.864423	0.63456	0.851447	0.835037	0.2462	0.781937	0.258589	0.774688	0.789703	0.800435	0.861278	0.0448118	0.648111	0.848575	0.792638	0.904102	0.604175	0.846976	0.823776	0.707187	0.75726	0.29688	0.838562	0.743466	0.755196
0.593818	0.492676	0.877096	0.223019	0.801091	0.201028	0.387838	0.0487737	0.157518	0.0202263	0.726056	0.914249	0.895679	0.0946501	0.568662	0.42572	0.940587	0.925773	0.842061	0.891369	0.849722	0.701413	0.868623	0.782157	0.735805	0.8227	0.628348	0.898767	0.781181	0.330556	0.774195	0.275642	0.730522	0.835096	0.793096	0.796007	0.0272976	0.590865	0.843866	0.76192	0.91932	0.537829	0.787933	0.811244	0.600496	0.708094	0.376996	0.840245	0.66733	0.793267
0.472663	0.502148	0.891257	0.28571	0.835057	0.201766	0.411033	0.0433529	0.144855	0.0335897	0.821016	0.918467	0.939951	0.0665338	0.685272	0.527257	0.924847	0.951184	0.870742	0.917307	0.863819	0.774854	0.841174	0.829632	0.782313	0.879568	0.65468	0.894437	0.847396	0.367277	0.802907	0.325494	0.803684	0.793498	0.806504	0.81241	0.0347818	0.572238	0.841891	0.787147	0.93099	0.672434	0.881582	0.868551	0.76637	0.726354	0.389772	0.8599	0.769841	0.778959
0.534549	0.48472	0.855974	0.232557	0.763113	0.216354	0.3831	0.101067	0.171669	0.0878427	0.675899	0.909504	0.85833	0.0889181	0.527847	0.501383	0.923131	0.88556	0.862079	0.897682	0.860826	0.591136	0.843948	0.762632	0.731702	0.814141	0.611144	0.892668	0.795809	0.195432	0.759355	0.265965	0.691286	0.741409	0.71329	0.844157	0.0633266	0.521186	0.819856	0.797358	0.903919	0.614778	0.799063	0.851876	0.659419	0.741929	0.248978	0.856845	0.746488	0.809401
0.48328	0.383483	0.899377	0.328364	0.769791	0.18991	0.297682	0.0555501	0.147171	0.0701274	0.79772	0.930375	0.881787	0.0992917	0.53655	0.456965	0.951818	0.932283	0.901608	0.903685	0.839944	0.737826	0.871123	0.817421	0.729113	0.851858	0.637372	0.852308	0.805796	0.154734	0.748491	0.271347	0.74344	0.82603	0.778025	0.841303	0.0374405	0.577117	0.858155	0.794596	0.927191	0.592497	0.832908	0.681498	0.704934	0.761039	0.2898	0.840477	0.757763	0.765135
0.484053	0.53927	0.870028	0.172125	0.796038	0.21487	0.363562	0.0359297	0.136875	0.0241637	0.772873	0.929318	0.904092	0.0782106	0.582026	0.439145	0.916847	0.904721	0.781174	0.918076	0.850718	0.76649	0.831423	0.798071	0.759216	0.831313	0.627918	0.878581	0.823841	0.262887	0.718252	0.279948	0.760549	0.80035	0.810125	0.878353	0.036891	0.546019	0.830914	0.815724	0.891851	0.513391	0.793132	0.844579	0.607218	0.759855	0.321007	0.766282	0.723666	0.745379
0.450762	0.49333	0.879116	0.242723	0.817907	0.18845	0.411644	0.0366269	0.144016	0.0676988	0.807767	0.94805	0.892541	0.166742	0.637962	0.409696	0.944598	0.915427	0.861824	0.918969	0.799091	0.760559	0.867485	0.829191	0.780454	0.844984	0.66781	0.881252	0.861043	0.183683	0.779519	0.309814	0.808577	0.758046	0.82758	0.83318	0.0270927	0.54728	0.856882	0.782436	0.946013	0.602873	0.834315	0.675283	0.667798	0.629758	0.416385	0.836134	0.739961	0.848931
0.500366	0.483297	0.896705	0.3016	0.839862	0.153168	0.40163	0.0353912	0.156383	0.0269793	0.807117	0.928903	0.927312	0.0641622	0.662354	0.547772	0.970246	0.928148	0.850714	0.925539	0.861907	0.78948	0.883666	0.839303	0.785588	0.858323	0.65026	0.894531	0.861885	0.327636	0.797066	0.292989	0.799221	0.790811	0.796088	0.817546	0.0284826	0.565668	0.862101	0.80452	0.922962	0.665314	0.853768	0.797506	0.746291	0.723861	0.311101	0.829145	0.779596	0.833257
0.570228	0.585104	0.804513	0.296392	0.744404	0.200163	0.428006	0.0581653	0.200619	0.0613694	0.71454	0.924724	0.866823	0.0812395	0.557085	0.452808	0.854064	0.857846	0.793156	0.903898	0.846928	0.726188	0.886734	0.743531	0.708179	0.773741	0.649012	0.840716	0.758543	0.320151	0.733149	0.295276	0.694965	0.73235	0.849463	0.79196	0.0760181	0.652755	0.872904	0.801168	0.909012	0.55021	0.796915	0.822655	0.5605	0.737602	0.269736	0.886886	0.753752	0.77937
0.456205	0.384504	0.903747	0.227889	0.876208	0.124836	0.367693	0.0249957	0.113238	0.0205357	0.877289	0.949274	0.914746	0.0351621	0.662558	0.370887	0.935368	0.970084	0.713798	0.896867	0.771824	0.866695	0.779073	0.859235	0.829867	0.893816	0.668879	0.894361	0.828376	0.238993	0.791667	0.223545	0.8785	0.782116	0.798339	0.881298	0.036696	0.727262	0.830541	0.842016	0.934731	0.636348	0.903651	0.887129	0.779039	0.775471	0.28408	0.870091	0.819243	0.678777
0.455883	0.502518	0.911637	0.258453	0.864023	0.158338	0.395404	0.0369184	0.131483	0.0213369	0.856726	0.935523	0.909139	0.0648815	0.639279	0.553635	0.947614	0.911747	0.842266	0.856251	0.875361	0.787166	0.871671	0.839773	0.813304	0.893989	0.658911	0.86953	0.882003	0.366668	0.768161	0.270557	0.857178	0.756685	0.853504	0.832015	0.0226062	0.601662	0.865555	0.814763	0.938794	0.609902	0.851886	0.865956	0.708409	0.745853	0.320707	0.853191	0.75004	0.86212
0.455753	0.514255	0.883234	0.2769	0.838563	0.177987	0.413281	0.0567073	0.159534	0.033925	0.867	0.893138	0.927884	0.0895651	0.678251	0.467269	0.940374	0.914695	0.882701	0.894833	0.806011	0.790671	0.850124	0.830838	0.7735	0.871605	0.669749	0.862697	0.835765	0.251975	0.777378	0.320436	0.797017	0.820619	0.674784	0.863341	0.0197339	0.470147	0.854228	0.836876	0.930162	0.556702	0.867971	0.846608	0.716833	0.76985	0.330627	0.86893	0.733127	0.788442
0.453654	0.392575	0.847474	0.271753	0.811126	0.187142	0.497523	0.0543678	0.149112	0.024961	0.761725	0.92526	0.901025	0.0898554	0.566195	0.411272	0.949054	0.92123	0.772945	0.905522	0.813652	0.741239	0.823692	0.775031	0.716783	0.8559	0.645153	0.867793	0.858061	0.224662	0.772368	0.256236	0.750875	0.648159	0.784412	0.849253	0.0533615	0.486485	0.841552	0.800995	0.926813	0.522362	0.815869	0.871654	0.663552	0.707616	0.278301	0.748615	0.705442	0.800268
0.512095	0.47636	0.869654	0.196453	0.80928	0.187392	0.380175	0.0621965	0.140425	0.0414953	0.787526	0.902097	0.853856	0.090969	0.570314	0.402484	0.929869	0.919968	0.835534	0.88365	0.852109	0.748751	0.816816	0.780932	0.755227	0.853481	0.646227	0.872797	0.807288	0.210557	0.771932	0.311559	0.761679	0.784134	0.839749	0.822852	0.0230785	0.540628	0.881243	0.797877	0.934223	0.587019	0.805285	0.866826	0.725785	0.717297	0.347587	0.754975	0.753488	0.816459
0.486947	0.433111	0.878049	0.293971	0.806752	0.19393	0.397301	0.0736886	0.159114	0.0381431	0.793518	0.916346	0.880997	0.116564	0.628891	0.391895	0.925866	0.897821	0.879249	0.852563	0.883211	0.709925	0.785284	0.784359	0.766658	0.844999	0.649314	0.842161	0.82038	0.326889	0.744134	0.300915	0.792577	0.796434	0.768572	0.814127	0.0476265	0.519863	0.8387	0.780075	0.904867	0.558042	0.814363	0.685014	0.677475	0.727296	0.346956	0.824114	0.757696	0.761141
0.487495	0.448481	0.894789	0.179423	0.825573	0.185874	0.399208	0.058159	0.1446	0.0266986	0.841216	0.329335	0.910731	0.0800754	0.642118	0.512501	0.909228	0.911692	0.797266	0.879774	0.834529	0.798944	0.827702	0.817064	0.77046	0.873997	0.662176	0.873922	0.852066	0.36054	0.736776	0.251251	0.782592	0.753936	0.740385	0.848146	0.0276343	0.639474	0.83681	0.798737	0.907942	0.560271	0.81052	0.869616	0.723991	0.766058	0.261248	0.708254	0.774547	0.767582
0.568048	0.439822	0.868026	0.178959	0.813947	0.153019	0.423898	0.046194	0.13964	0.0327589	0.764934	0.923627	0.880672	0.0558659	0.585799	0.407123	0.923215	0.913998	0.818536	0.895455	0.756823	0.755278	0.830853	0.782934	0.725472	0.852406	0.611535	0.829617	0.801091	0.323284	0.740619	0.313641	0.79413	0.68884	0.798366	0.826076	0.0249084	0.602543	0.837088	0.812282	0.927442	0.577149	0.804551	0.880264	0.635415	0.729391	0.320299	0.797439	0.777221	0.833123
0.504658	0.48896	0.874133	0.293683	0.790983	0.204229	0.471308	0.0599191	0.178705	0.0206998	0.764648	0.936072	0.908845	0.130246	0.629604	0.525254	0.942226	0.927904	0.837157	0.922043	0.834437	0.767106	0.852012	0.786015	0.766155	0.845626	0.641661	0.886633	0.803487	0.278874	0.776114	0.308526	0.801481	0.83124	0.811495	0.858185	0.0369755	0.604175	0.904067	0.820216	0.942706	0.571054	0.830798	0.817774	0.69445	0.699519	0.280176	0.807152	0.737732	0.768179
0.462585	0.445469	0.883851	0.193956	0.778818	0.182378	0.404992	0.0786874	0.144586	0.0331665	0.793853	0.921218	0.892588	0.0528209	0.672283	0.414308	0.951072	0.915297	0.84886	0.904487	0.865454	0.72463	0.798531	0.805085	0.742717	0.844975	0.6357	0.881346	0.808591	0.184196	0.760096	0.279889	0.824514	0.772411	0.76936	0.864026	0.0473451	0.627924	0.862575	0.79078	0.892803	0.602778	0.795428	0.801039	0.666689	0.782906	0.261514	0.734358	0.753774	0.812291
0.432937	0.551883	0.863382	0.155083	0.802263	0.196317	0.444354	0.0468179	0.144923	0.029873	0.799599	0.952801	0.908269	0.0791153	0.611529	0.365118	0.926527	0.882524	0.772681	0.912294	0.85243	0.756729	0.891597	0.78166	0.745207	0.828656	0.644485	0.868575	0.853297	0.218722	0.77563	0.285909	0.800213	0.7709	0.842683	0.786234	0.0273041	0.585521	0.891418	0.803584	0.929892	0.610455	0.83637	0.735444	0.591795	0.699745	0.246858	0.683178	0.723761	0.754157
0.530097	0.497641	0.889337	0.267614	0.825573	0.173754	0.461268	0.0412005	0.147187	0.0175843	0.85894	0.928842	0.931995	0.0574853	0.68961	0.6043	0.948283	0.935879	0.853604	0.894518	0.814391	0.825098	0.88538	0.824785	0.791491	0.874515	0.662053	0.892145	0.841746	0.267718	0.782569	0.301561	0.823675	0.836649	0.854201	0.838779	0.0306661	0.586993	0.851883	0.821652	0.950007	0.662119	0.849479	0.829654	0.762905	0.718355	0.337632	0.897707	0.802724	0.79047
0.534286	0.449207	0.888353	0.314511	0.782575	0.188771	0.418501	0.11822	0.176798	0.0422889	0.687586	0.922381	0.845079	0.102777	0.472789	0.466622	0.915984	0.894898	0.789604	0.883934	0.880724	0.648496	0.846171	0.733593	0.730604	0.806342	0.647007	0.899412	0.81474	0.212509	0.763026	0.273748	0.720747	0.843137	0.748759	0.854132	0.0513946	0.633669	0.811521	0.802114	0.937285	0.523894	0.770258	0.833279	0.56808	0.718677	0.368793	0.912349	0.751917	0.783934
0.483579	0.469399	0.895262	0.229108	0.813211	0.185998	0.506499	0.0349302	0.18288	0.0339398	0.836202	0.351802	0.920862	0.0764307	0.626499	0.559947	0.941568	0.931279	0.844084	0.889155	0.870776	0.818482	0.884815	0.795445	0.80506	0.858827	0.677146	0.860413	0.862977	0.358911	0.795774	0.301725	0.832693	0.838381	0.780928	0.873848	0.0265118	0.665306	0.872131	0.803611	0.930375	0.584371	0.875081	0.858955	0.717706	0.777062	0.341824	0.824764	0.764847	0.81153
0.49593	0.519022	0.869547	0.16354	0.808438	0.246077	0.41206	0.0692054	0.225398	0.0445719	0.822238	0.927427	0.901621	0.0934129	0.65891	0.550907	0.947418	0.925492	0.817783	0.883437	0.890682	0.756812	0.927074	0.820221	0.781055	0.857095	0.652766	0.883494	0.865573	0.190325	0.78539	0.282702	0.762036	0.874614	0.842603	0.854013	0.0470388	0.640715	0.870378	0.832521	0.946669	0.615732	0.84832	0.760157	0.695712	0.802414	0.336757	0.838213	0.736278	0.833816
0.471232	0.519206	0.870933	0.251925	0.80093	0.178165	0.362519	0.0497855	0.20158	0.0371324	0.746766	0.927812	0.881997	0.125629	0.578428	0.540007	0.940176	0.9142	0.861385	0.909215	0.821511	0.757499	0.830865	0.801062	0.745846	0.819926	0.658596	0.871947	0.804553	0.170482	0.761944	0.294227	0.777394	0.76397	0.814883	0.844839	0.0402207	0.545364	0.86137	0.812422	0.913163	0.603178	0.794313	0.840383	0.658549	0.674166	0.321807	0.825919	0.738868	0.799281
0.446617	0.443444	0.880386	0.2485	0.811107	0.190533	0.495785	0.0590628	0.190135	0.0273405	0.836208	0.919066	0.895145	0.0812138	0.681408	0.58268	0.948005	0.95145	0.858123	0.887565	0.877571	0.817605	0.851807	0.803723	0.780129	0.842945	0.65638	0.881037	0.862466	0.130186	0.744311	0.304613	0.758442	0.693836	0.794557	0.860642	0.0375723	0.53822	0.840577	0.805673	0.926297	0.591475	0.835231	0.853078	0.719247	0.762855	0.233519	0.872021	0.714017	0.867347
0.38854	0.441497	0.914681	0.100772	0.82358	0.1456	0.353491	0.0407728	0.137846	0.0335114	0.806086	0.94164	0.935385	0.0519102	0.65545	0.48535	0.939187	0.926808	0.861616	0.881348	0.870428	0.826762	0.838063	0.837252	0.843078	0.895468	0.694069	0.873379	0.81514	0.13542	0.782472	0.213237	0.876141	0.825911	0.687419	0.83438	0.0377945	0.726381	0.841747	0.849429	0.940265	0.667786	0.844203	0.814892	0.70163	0.577775	0.149601	0.637541	0.762961	0.819433
0.490425	0.601004	0.881719	0.242047	0.837775	0.208643	0.396949	0.0504313	0.187684	0.0151773	0.774677	0.920539	0.903641	0.0742413	0.616252	0.526831	0.948262	0.931052	0.865026	0.899451	0.868919	0.811367	0.890158	0.793256	0.76937	0.850663	0.653398	0.892705	0.837025	0.384512	0.775222	0.283994	0.817379	0.767188	0.795606	0.823959	0.0309817	0.611941	0.883382	0.811838	0.947598	0.595047	0.860376	0.891346	0.695578	0.760895	0.36225	0.840158	0.760878	0.881893
0.542713	0.499194	0.884945	0.24519	0.782088	0.21272	0.394776	0.0629165	0.189657	0.0276727	0.819568	0.913443	0.897926	0.0992999	0.654881	0.63753	0.957204	0.920897	0.872751	0.91115	0.865005	0.742601	0.883839	0.794291	0.768513	0.824308	0.637135	0.883478	0.827069	0.241871	0.799167	0.293467	0.815504	0.797133	0.795396	0.816672	0.0289863	0.573719	0.87962	0.789598	0.940468	0.59715	0.813903	0.864918	0.657149	0.750526	0.300391	0.810363	0.75708	0.92943
0.44243	0.440695	0.912121	0.275611	0.804567	0.185454	0.460041	0.0667094	0.223064	0.0217993	0.793983	0.91311	0.911246	0.108654	0.619441	0.553784	0.94798	0.925885	0.87409	0.900509	0.827233	0.787934	0.893147	0.830378	0.771348	0.854677	0.655997	0.888075	0.859068	0.336954	0.787286	0.30741	0.792758	0.832815	0.767333	0.869472	0.0479198	0.604426	0.898467	0.814456	0.936048	0.675761	0.841979	0.818783	0.65773	0.747475	0.515141	0.892856	0.714476	0.860691
0.496395	0.463733	0.883261	0.331971	0.799408	0.184385	0.453649	0.0644857	0.215986	0.0415745	0.756141	0.930965	0.87878	0.10023	0.571886	0.518183	0.936236	0.910979	0.888836	0.900125	0.871268	0.768245	0.875961	0.762644	0.749016	0.815251	0.706713	0.878981	0.809303	0.31921	0.77805	0.327248	0.759943	0.818827	0.867364	0.803765	0.0421638	0.565923	0.858769	0.781248	0.953395	0.543704	0.812085	0.800112	0.651331	0.739487	0.389014	0.850391	0.710948	0.857887
0.504603	0.489684	0.880807	0.252775	0.811434	0.184609	0.343171	0.0426187	0.201068	0.0443197	0.831352	0.917433	0.881197	0.0993689	0.659226	0.607473	0.934335	0.915146	0.87577	0.911018	0.864159	0.728472	0.847908	0.807968	0.780438	0.834798	0.651685	0.883872	0.826081	0.271897	0.727135	0.287885	0.761005	0.834625	0.795624	0.848148	0.0438131	0.661817	0.855652	0.799147	0.933126	0.606356	0.806554	0.81566	0.612975	0.739467	0.428996	0.816123	0.687935	0.891727
0.460403	0.674899	0.889036	0.296994	0.762667	0.194362	0.355928	0.0662395	0.182942	0.040764	0.733639	0.917302	0.888065	0.0752113	0.579197	0.42309	0.971726	0.903167	0.811918	0.910907	0.873213	0.775877	0.87665	0.786256	0.777899	0.848631	0.661501	0.912168	0.80964	0.328834	0.827275	0.316702	0.722097	0.750354	0.770766	0.831727	0.0412061	0.672942	0.871814	0.818951	0.937871	0.573307	0.85474	0.874954	0.682742	0.684506	0.321024	0.8652	0.788796	0.914459
0.411122	0.420797	0.868784	0.295681	0.807693	0.217986	0.451558	0.0436757	0.224869	0.0435099	0.719424	0.921229	0.879535	0.0797956	0.599412	0.505267	0.938436	0.914432	0.79117	0.888788	0.807428	0.785236	0.858218	0.746929	0.784138	0.833846	0.677317	0.867356	0.819627	0.289318	0.756056	0.244861	0.741667	0.74331	0.793029	0.827011	0.0276207	0.512958	0.810959	0.806936	0.937254	0.547161	0.816174	0.869185	0.594259	0.777697	0.279344	0.804618	0.685612	0.822734
0.520925	0.513392	0.886709	0.257469	0.793658	0.180959	0.369113	0.0549021	0.22717	0.0589727	0.77722	0.930531	0.906275	0.101926	0.646138	0.503441	0.925694	0.924001	0.861066	0.909518	0.858523	0.760816	0.829512	0.777842	0.777988	0.849036	0.660115	0.891864	0.840478	0.4203	0.761484	0.334825	0.782199	0.77995	0.840319	0.841241	0.03691	0.540673	0.841479	0.795579	0.93882	0.640954	0.851865	0.843565	0.624294	0.736579	0.345699	0.829453	0.713934	0.829672
0.503349	0.430829	0.894353	0.199046	0.781068	0.217011	0.373478	0.0722573	0.261416	0.0568878	0.79831	0.927754	0.882011	0.132352	0.638654	0.504639	0.949993	0.908296	0.833028	0.895891	0.851662	0.784039	0.899245	0.760331	0.771887	0.837224	0.694811	0.822649	0.835459	0.322105	0.784081	0.277464	0.766886	0.855269	0.791631	0.845992	0.0669589	0.576449	0.823046	0.824206	0.939724	0.553671	0.815463	0.855023	0.678779	0.656777	0.241452	0.831257	0.745683	0.88014
0.518285	0.550716	0.855694	0.218754	0.827591	0.243751	0.457937	0.0472593	0.238654	0.0462988	0.790469	0.386098	0.897417	0.0963863	0.628358	0.615343	0.942657	0.923609	0.865961	0.925783	0.853208	0.771393	0.904149	0.790346	0.741181	0.842691	0.663917	0.882665	0.818248	0.281024	0.759908	0.280181	0.829289	0.798367	0.853412	0.833869	0.0656312	0.52572	0.817154	0.801576	0.94845	0.614052	0.835988	0.733129	0.688468	0.76467	0.325463	0.849526	0.781841	0.911525
0.40571	0.491719	0.885683	0.22125	0.796201	0.212603	0.429673	0.0472505	0.223091	0.0460859	0.769532	0.918062	0.901966	0.0805112	0.603324	0.615522	0.919879	0.892733	0.814225	0.892503	0.879174	0.785633	0.899558	0.800678	0.780902	0.83816	0.678333	0.855824	0.828908	0.268255	0.787798	0.330376	0.78826	0.913569	0.775232	0.803513	0.0244552	0.557191	0.854081	0.792311	0.933018	0.550351	0.859868	0.85306	0.628329	0.749941	0.289476	0.827586	0.721161	0.884145
0.512839	0.530835	0.896933	0.156771	0.8091	0.178684	0.337764	0.0395494	0.176913	0.043221	0.815892	0.932398	0.905481	0.0620189	0.641106	0.473437	0.955685	0.936057	0.847718	0.93263	0.904464	0.784456	0.857694	0.83307	0.825715	0.884086	0.678158	0.918181	0.858661	0.177582	0.746139	0.268668	0.812033	0.829779	0.845955	0.866113	0.0494377	0.65444	0.85007	0.812772	0.923873	0.625888	0.844415	0.827101	0.681777	0.748135	0.423335	0.82787	0.772628	0.812834
0.448958	0.420354	0.884083	0.310632	0.848371	0.178941	0.452779	0.0326133	0.173922	0.0277413	0.8244	0.92244	0.922023	0.0637192	0.581013	0.594943	0.941072	0.947252	0.845913	0.933118	0.737806	0.80799	0.873256	0.830653	0.800008	0.867709	0.671508	0.891726	0.893306	0.21908	0.787782	0.29333	0.759616	0.739698	0.798669	0.856762	0.0382211	0.634263	0.887296	0.849312	0.914462	0.572362	0.855074	0.848314	0.717237	0.764984	0.361383	0.904732	0.714714	0.837535
0.401233	0.533702	0.88938	0.262808	0.829341	0.140889	0.404186	0.0403434	0.191603	0.0292976	0.862839	0.943842	0.937723	0.077125	0.680417	0.639734	0.953473	0.946903	0.8916	0.915242	0.908944	0.801027	0.899927	0.84927	0.80799	0.887673	0.655418	0.894523	0.872071	0.19329	0.784976	0.294189	0.826059	0.838221	0.831258	0.858214	0.0386491	0.558423	0.859361	0.837426	0.944085	0.643702	0.891091	0.789486	0.666721	0.727929	0.329518	0.853321	0.740743	0.830228
0.466129	0.394419	0.87438	0.192547	0.80584	0.194611	0.372484	0.0466439	0.210212	0.0480076	0.748211	0.907101	0.904636	0.0868983	0.636284	0.433346	0.947392	0.910383	0.845301	0.934623	0.841295	0.684588	0.876583	0.825268	0.767713	0.849501	0.628467	0.88751	0.812185	0.0995477	0.776376	0.282192	0.727078	0.813052	0.81755	0.846412	0.0290559	0.630694	0.918115	0.824089	0.951135	0.542209	0.845874	0.868553	0.680317	0.788536	0.173735	0.646375	0.69878	0.873203
0.520281	0.589163	0.878995	0.344561	0.797845	0.264005	0.464685	0.0688763	0.210952	0.0754988	0.734564	0.9306	0.891073	0.140378	0.621123	0.591921	0.940587	0.931112	0.84537	0.890916	0.84639	0.75133	0.837302	0.792488	0.751885	0.836769	0.671825	0.898184	0.815621	0.361466	0.726325	0.286562	0.745282	0.822585	0.798499	0.879592	0.09823	0.594197	0.838669	0.805153	0.945596	0.54587	0.814908	0.869079	0.616066	0.745874	0.440482	0.857634	0.761165	0.861608
0.545561	0.459639	0.918235	0.21383	0.888905	0.161911	0.414057	0.0297953	0.168043	0.0240529	0.831115	0.948488	0.92647	0.0618556	0.622853	0.626231	0.940276	0.955766	0.803524	0.871921	0.860875	0.825844	0.779202	0.833674	0.832191	0.9255	0.70309	0.926275	0.854023	0.0862844	0.781426	0.230012	0.851897	0.637424	0.834629	0.88413	0.0263609	0.541422	0.773307	0.844764	0.944803	0.574914	0.857098	0.80373	0.779409	0.811372	0.279849	0.792893	0.669174	0.862986
0.430722	0.440075	0.905085	0.219359	0.817921	0.159274	0.445812	0.0587275	0.192996	0.0219707	0.848772	0.927397	0.94402	0.072993	0.689669	0.533196	0.949919	0.940044	0.851311	0.931196	0.821973	0.817317	0.881118	0.812168	0.827668	0.893361	0.624805	0.875501	0.858484	0.291456	0.788407	0.278362	0.825775	0.791423	0.827166	0.828169	0.0297495	0.574975	0.889258	0.831184	0.941853	0.692802	0.88549	0.868127	0.75089	0.757618	0.439837	0.785671	0.787985	0.794392
0.587971	0.424403	0.883765	0.345215	0.812022	0.195724	0.419835	0.0490133	0.20798	0.0283738	0.804044	0.925784	0.903943	0.0716766	0.631875	0.482955	0.918083	0.919977	0.8676	0.889052	0.882031	0.793091	0.858606	0.81348	0.778425	0.843253	0.62177	0.85771	0.832025	0.279169	0.780462	0.272758	0.761432	0.837332	0.843573	0.830285	0.0198736	0.641813	0.879431	0.790361	0.937312	0.61648	0.844446	0.87326	0.698089	0.72705	0.387464	0.879957	0.765165	0.805126
0.388607	0.328558	0.888873	0.225971	0.825201	0.180465	0.413168	0.0296501	0.154417	0.0210967	0.856919	0.932759	0.920085	0.0712276	0.642505	0.597359	0.946948	0.938731	0.836066	0.85567	0.862233	0.81677	0.809823	0.848464	0.805658	0.910295	0.664	0.876693	0.872584	0.15469	0.727985	0.275454	0.774051	0.679544	0.762529	0.860558	0.0255738	0.560924	0.859933	0.8493	0.91867	0.672476	0.889257	0.817287	0.720204	0.816271	0.358381	0.852004	0.690678	0.793811
0.540187	0.351715	0.890983	0.183554	0.835754	0.137667	0.417332	0.0725989	0.175882	0.0278537	0.860153	0.931583	0.944944	0.0295741	0.715102	0.51328	0.945944	0.933944	0.858545	0.920148	0.854429	0.819633	0.85728	0.832037	0.825494	0.891514	0.661757	0.882622	0.86297	0.188387	0.778245	0.275949	0.821305	0.658384	0.842832	0.826118	0.0414069	0.556494	0.907145	0.846122	0.94976	0.656048	0.890253	0.84463	0.751437	0.753698	0.390084	0.836068	0.760307	0.851002
0.482491	0.429593	0.87461	0.272977	0.832284	0.174234	0.402704	0.0432178	0.183431	0.0413118	0.814411	0.915506	0.920183	0.0874125	0.669579	0.464205	0.940083	0.937418	0.863716	0.930278	0.860747	0.799694	0.843449	0.842301	0.804079	0.893406	0.653568	0.884754	0.871612	0.275773	0.74515	0.275959	0.79678	0.853954	0.799177	0.855711	0.0314885	0.52755	0.867053	0.815236	0.941257	0.616981	0.8744	0.840282	0.712726	0.775185	0.338801	0.832263	0.695777	0.864572
0.441492	0.580144	0.876204	0.137086	0.82916	0.156953	0.400876	0.04392	0.185364	0.0153006	0.843202	0.915352	0.929274	0.0501416	0.631024	0.543488	0.955298	0.935943	0.872611	0.93294	0.868098	0.82954	0.876907	0.824539	0.825805	0.869847	0.691877	0.886318	0.855327	0.477373	0.82265	0.28734	0.813532	0.764848	0.798085	0.782293	0.0296581	0.81847	0.864354	0.853196	0.946358	0.668457	0.858828	0.838993	0.652218	0.736635	0.205888	0.871793	0.762409	0.857745
0.542505	0.427894	0.887591	0.282307	0.803962	0.16371	0.464031	0.0492988	0.196921	0.0302763	0.801576	0.927666	0.922724	0.093003	0.662494	0.531122	0.948026	0.944996	0.892249	0.909893	0.80857	0.815265	0.901703	0.799739	0.80043	0.882001	0.66121	0.886219	0.840234	0.260607	0.803711	0.258797	0.811989	0.721076	0.822243	0.812032	0.0282964	0.572807	0.899434	0.814109	0.931009	0.652203	0.849964	0.878008	0.685366	0.750204	0.364152	0.822294	0.747785	0.835453
0.627134	0.47046	0.89445	0.311812	0.853656	0.146895	0.397431	0.0480597	0.187153	0.0634136	0.816599	0.944857	0.944652	0.0874888	0.65275	0.508246	0.964378	0.926387	0.891842	0.900958	0.837738	0.821437	0.896896	0.832355	0.806343	0.894915	0.688088	0.870773	0.862093	0.196223	0.762583	0.275078	0.822234	0.69271	0.828954	0.834688	0.0292806	0.556414	0.884821	0.83083	0.947899	0.681382	0.873777	0.827756	0.745098	0.777173	0.297553	0.856576	0.737838	0.899061
0.754042	0.406718	0.899534	0.329042	0.83181	0.142121	0.447371	0.0374678	0.233784	0.076838	0.70229	0.936033	0.894955	0.102649	0.561366	0.537848	0.95192	0.91561	0.886495	0.882859	0.920533	0.803647	0.852231	0.758148	0.778857	0.854326	0.667023	0.922847	0.827494	0.291782	0.828067	0.293874	0.773435	0.798816	0.77336	0.850505	0.0258077	0.527211	0.905501	0.767072	0.914846	0.455035	0.877438	0.871399	0.6277	0.776	0.374884	0.912707	0.749718	0.731611
0.559162	0.401809	0.843221	0.294103	0.816381	0.155736	0.429372	0.059871	0.163255	0.0325923	0.78805	0.899252	0.870517	0.111286	0.642992	0.475587	0.944967	0.889326	0.919732	0.867755	0.67303	0.782355	0.796743	0.809515	0.773629	0.792545	0.659272	0.854954	0.808096	0.293531	0.759393	0.268062	0.772369	0.742017	0.743612	0.849846	0.0234816	0.570038	0.910728	0.804012	0.909496	0.65506	0.828987	0.894995	0.633591	0.734893	0.351057	0.794073	0.712014	0.804135
0.495812	0.504486	0.899393	0.388784	0.832183	0.170264	0.538791	0.0692816	0.215169	0.0338562	0.796771	0.89394	0.885121	0.159723	0.567247	0.43585	0.935677	0.919214	0.849027	0.89585	0.864333	0.730718	0.890209	0.821821	0.77957	0.861308	0.678432	0.856118	0.842447	0.254821	0.731285	0.292004	0.82181	0.831761	0.772877	0.842158	0.0414832	0.615454	0.823191	0.80201	0.931913	0.612894	0.849814	0.866265	0.728743	0.733066	0.340236	0.858858	0.693385	0.807685
0.484506	0.528408	0.86123	0.353405	0.802519	0.174311	0.433365	0.0808398	0.193974	0.104396	0.78372	0.917307	0.875436	0.136938	0.595331	0.603937	0.947349	0.908204	0.843234	0.878094	0.764014	0.804611	0.881144	0.776883	0.789102	0.838967	0.627446	0.859748	0.817817	0.247511	0.722249	0.305499	0.768905	0.769021	0.784426	0.806541	0.0685223	0.629162	0.840177	0.807702	0.938498	0.5836	0.825423	0.728282	0.597921	0.658548	0.320385	0.886333	0.773057	0.863122
0.46116	0.504963	0.892005	0.397823	0.803926	0.191579	0.404756	0.0693379	0.249102	0.0514335	0.733151	0.936907	0.862783	0.111182	0.572199	0.552194	0.931316	0.867924	0.932072	0.906141	0.886153	0.767835	0.881044	0.744415	0.715785	0.825704	0.673084	0.877558	0.790787	0.313976	0.714982	0.26693	0.788174	0.823235	0.833765	0.815504	0.0460674	0.601714	0.908135	0.797871	0.922303	0.611246	0.797956	0.837831	0.612541	0.717722	0.313915	0.840176	0.761849	0.882597
0.47196	0.468892	0.902858	0.222306	0.791317	0.209085	0.458613	0.0491272	0.226799	0.0429178	0.863363	0.944155	0.919873	0.0797211	0.694547	0.4566	0.951067	0.920006	0.916164	0.913834	0.910617	0.760549	0.878402	0.818551	0.811137	0.86669	0.677894	0.862453	0.849947	0.365375	0.762952	0.258371	0.825149	0.793463	0.86054	0.796816	0.0383747	0.625287	0.886777	0.794634	0.937373	0.615102	0.861702	0.764874	0.680519	0.733386	0.353139	0.830561	0.801713	0.844789
0.372301	0.240407	0.887484	0.136354	0.843292	0.179915	0.390084	0.0410095	0.202138	0.0237082	0.823293	0.930252	0.935653	0.0577121	0.65401	0.443648	0.946528	0.941301	0.879751	0.928475	0.862184	0.830198	0.865921	0.801969	0.797818	0.876716	0.645647	0.883768	0.860245	0.465835	0.779589	0.287044	0.822156	0.761278	0.785958	0.84863	0.0396995	0.561835	0.837469	0.804679	0.92953	0.650364	0.877847	0.850152	0.761267	0.752481	0.254524	0.857651	0.784689	0.906947
0.528459	0.498499	0.884483	0.310905	0.790203	0.17367	0.483294	0.0587313	0.246283	0.050941	0.778477	0.925396	0.890862	0.104974	0.647164	0.468612	0.944464	0.905024	0.883703	0.91858	0.860095	0.787603	0.892061	0.794595	0.796145	0.824509	0.681135	0.859223	0.830448	0.357014	0.766781	0.275675	0.781622	0.800514	0.813437	0.822046	0.0463236	0.651579	0.851342	0.80387	0.939873	0.600223	0.836632	0.811588	0.820807	0.733847	0.469484	0.853467	0.796814	0.896102
0.536931	0.427941	0.886937	0.167927	0.832074	0.179663	0.398308	0.0657553	0.224738	0.0332627	0.76754	0.91585	0.91559	0.0791	0.652533	0.589302	0.932246	0.931115	0.863667	0.898085	0.797306	0.782669	0.827501	0.786402	0.797392	0.852602	0.658241	0.893519	0.860118	0.303267	0.781552	0.300474	0.800471	0.729562	0.760041	0.84361	0.0508199	0.582074	0.894639	0.811612	0.937572	0.602851	0.86042	0.810096	0.705365	0.723043	0.414661	0.769095	0.714347	0.840726
0.480023	0.441896	0.914233	0.219609	0.858324	0.142861	0.477275	0.0234542	0.181255	0.0276674	0.864672	0.952156	0.95313	0.0848544	0.742903	0.569893	0.96288	0.963973	0.898159	0.907298	0.901787	0.818892	0.900661	0.839915	0.892428	0.914174	0.741115	0.916759	0.876724	0.185381	0.831059	0.264721	0.858763	0.733901	0.876554	0.886655	0.0306355	0.62908	0.880502	0.873082	0.944266	0.660139	0.910468	0.867934	0.773781	0.738844	0.169241	0.873671	0.815059	0.90738
0.55914	0.469947	0.886765	0.274809	0.778715	0.189284	0.507427	0.0491259	0.206627	0.0477094	0.788571	0.933502	0.892643	0.11217	0.662414	0.368865	0.931593	0.921204	0.88593	0.907943	0.853417	0.777037	0.882454	0.815106	0.781761	0.869531	0.667812	0.871966	0.828249	0.314401	0.780413	0.264406	0.821504	0.81577	0.811759	0.86665	0.0268162	0.604304	0.886752	0.810119	0.939991	0.601978	0.849248	0.876539	0.702335	0.76582	0.321437	0.799877	0.815537	0.906562
0.482979	0.490423	0.90626	0.208609	0.812361	0.190614	0.495211	0.0788283	0.225107	0.0813501	0.777078	0.934925	0.903496	0.128411	0.690877	0.420443	0.945938	0.92444	0.901102	0.927222	0.839064	0.779742	0.915055	0.787054	0.791882	0.855528	0.641222	0.895094	0.833527	0.340591	0.799336	0.27704	0.774456	0.891606	0.801723	0.82578	0.0371571	0.600114	0.880078	0.805304	0.953968	0.604118	0.856019	0.84895	0.685107	0.655129	0.341047	0.837564	0.758377	0.870238
0.446273	0.403374	0.867763	0.166064	0.795244	0.245974	0.417008	0.0651293	0.222898	0.0474479	0.79602	0.926614	0.904553	0.236775	0.629257	0.605066	0.955363	0.919216	0.874743	0.905561	0.842527	0.770071	0.88219	0.794434	0.765166	0.862208	0.649745	0.900338	0.827428	0.32574	0.759065	0.305647	0.756206	0.768338	0.840647	0.871696	0.044865	0.487189	0.876671	0.807522	0.921411	0.630644	0.84967	0.767304	0.675499	0.738125	0.343995	0.8401	0.743378	0.822498
0.554764	0.509422	0.8339	0.341344	0.755655	0.222367	0.390704	0.0990073	0.257159	0.118122	0.667476	0.929284	0.843188	0.161701	0.544156	0.450658	0.925325	0.885748	0.833368	0.913108	0.815111	0.718614	0.880163	0.73203	0.693853	0.788539	0.666423	0.902438	0.746952	0.297936	0.7596	0.276892	0.708873	0.78338	0.825029	0.784642	0.047355	0.586997	0.877656	0.798649	0.93629	0.515594	0.774251	0.815923	0.58482	0.70531	0.321857	0.825885	0.781222	0.873894
0.470441	0.411442	0.873111	0.189639	0.839484	0.15219	0.271818	0.0481526	0.200202	0.0460167	0.873084	0.929929	0.943778	0.0950671	0.683437	0.513817	0.963136	0.959629	0.870009	0.919167	0.88495	0.808789	0.873357	0.823638	0.837538	0.896915	0.671866	0.900638	0.840683	0.194469	0.806111	0.279393	0.862668	0.816659	0.831654	0.534733	0.0484056	0.716618	0.878087	0.845544	0.937346	0.581855	0.890754	0.813645	0.778516	0.759003	0.444652	0.784446	0.766587	0.800665
0.600416	0.507742	0.923479	0.16513	0.862637	0.109908	0.415355	0.026495	0.188506	0.0298763	0.789038	0.945551	0.901388	0.0700636	0.584111	0.45142	0.953738	0.945049	0.882682	0.899874	0.926553	0.820086	0.759782	0.835745	0.830134	0.888005	0.728409	0.934116	0.853992	0.173236	0.838394	0.196113	0.817518	0.761025	0.805149	0.907799	0.0320304	0.577018	0.878074	0.898514	0.934578	0.603301	0.874617	0.812097	0.689999	0.799045	0.239425	0.900379	0.855226	0.735544
0.449896	0.503668	0.892513	0.195463	0.806129	0.194942	0.430221	0.0348407	0.212612	0.0327441	0.839676	0.91409	0.927607	0.0768259	0.708481	0.489304	0.944252	0.940397	0.876685	0.913447	0.874703	0.788186	0.89619	0.820554	0.811084	0.851742	0.663232	0.878776	0.862343	0.295462	0.738457	0.280767	0.803497	0.849765	0.860437	0.843745	0.0359336	0.636716	0.856899	0.801529	0.951896	0.666476	0.878396	0.840756	0.673774	0.712187	0.283723	0.824755	0.713889	0.914948
0.471659	0.542852	0.856966	0.231609	0.783538	0.199218	0.415237	0.086316	0.242411	0.0761266	0.739389	0.942974	0.89228	0.0966908	0.641482	0.410893	0.921228	0.89475	0.869931	0.909875	0.822251	0.753656	0.881132	0.761054	0.747861	0.828134	0.669433	0.879772	0.814757	0.287078	0.758678	0.302901	0.706358	0.809589	0.882589	0.854143	0.0540744	0.649769	0.881833	0.809584	0.925846	0.609245	0.826765	0.810367	0.622743	0.74479	0.318619	0.855314	0.777895	0.846272
0.417462	0.436928	0.87236	0.26378	0.800208	0.196648	0.412208	0.034923	0.231837	0.0256822	0.835198	0.916251	0.934104	0.0606241	0.667973	0.561792	0.941144	0.909504	0.826708	0.905266	0.760505	0.788546	0.886675	0.811776	0.786244	0.854043	0.689704	0.902163	0.83573	0.225517	0.748556	0.287106	0.811606	0.835086	0.784284	0.819267	0.0195953	0.600386	0.913568	0.818546	0.926026	0.64378	0.863681	0.793216	0.666513	0.734971	0.218434	0.887299	0.739841	0.822314
0.49792	0.502538	0.871387	0.220459	0.827226	0.206111	0.402301	0.0357609	0.213106	0.038245	0.780066	0.925116	0.890759	0.108229	0.632709	0.542214	0.951019	0.925614	0.880776	0.901173	0.830524	0.772176	0.886541	0.800335	0.779116	0.825964	0.690801	0.865461	0.838726	0.234595	0.766843	0.258554	0.781328	0.811737	0.807516	0.851275	0.0438751	0.611723	0.871457	0.790061	0.9459	0.597266	0.828418	0.779023	0.667453	0.717774	0.376655	0.760283	0.795934	0.893439
0.47946	0.449054	0.87815	0.210261	0.833022	0.162926	0.43693	0.0408025	0.217623	0.0418651	0.817333	0.913756	0.903789	0.0866564	0.670569	0.461972	0.935239	0.934012	0.860554	0.923968	0.815623	0.768117	0.872323	0.816896	0.772338	0.844089	0.668352	0.838372	0.846034	0.226442	0.786193	0.309619	0.793519	0.792715	0.852617	0.876627	0.0371531	0.645519	0.895371	0.813737	0.941688	0.640774	0.855721	0.841736	0.712074	0.646045	0.353677	0.801295	0.776084	0.880027
0.447372	0.489867	0.909272	0.148698	0.843466	0.154076	0.349533	0.0915987	0.201646	0.0441401	0.828769	0.947485	0.91274	0.0781301	0.666264	0.381516	0.944556	0.915841	0.875981	0.894503	0.918452	0.767553	0.798452	0.827478	0.84427	0.865785	0.691583	0.893592	0.802217	0.318431	0.742187	0.257304	0.808873	0.684238	0.774525	0.859951	0.0566174	0.595824	0.875898	0.810755	0.948948	0.654381	0.879952	0.873446	0.679798	0.767049	0.364834	0.774852	0.775848	0.794535
0.530896	0.437171	0.872346	0.25178	0.791103	0.223849	0.430997	0.03516	0.198803	0.0448733	0.793488	0.920853	0.896243	0.1063	0.602526	0.556935	0.939171	0.920103	0.879464	0.899282	0.781807	0.742241	0.8838	0.760928	0.746606	0.80875	0.671322	0.870051	0.822798	0.224343	0.71987	0.236371	0.771749	0.796023	0.818279	0.83402	0.0348086	0.640585	0.86757	0.774145	0.934845	0.532807	0.849155	0.692018	0.63291	0.693245	0.34153	0.804541	0.778153	0.883418
0.469893	0.445531	0.869855	0.247986	0.799938	0.190884	0.451871	0.0397947	0.25814	0.10376	0.77028	0.914685	0.92102	0.0721864	0.63332	0.620301	0.936919	0.898238	0.871635	0.885597	0.879249	0.721718	0.906822	0.788682	0.766306	0.81122	0.659122	0.877647	0.812479	0.130907	0.753879	0.294032	0.756021	0.813975	0.888605	0.822025	0.0461523	0.604278	0.889933	0.790624	0.940075	0.610713	0.803414	0.860861	0.667486	0.748262	0.376599	0.762268	0.757264	0.890601
0.456557	0.506288	0.89424	0.250714	0.824948	0.172232	0.401343	0.0231369	0.240755	0.0314014	0.78944	0.934363	0.921302	0.0846931	0.739525	0.426667	0.964942	0.935439	0.905101	0.90329	0.882865	0.769775	0.8798	0.833466	0.795747	0.858064	0.670138	0.860777	0.845461	0.355045	0.805561	0.260473	0.835544	0.906755	0.836315	0.831344	0.0320166	0.636764	0.850595	0.79334	0.94224	0.679749	0.850286	0.863422	0.736018	0.81548	0.402184	0.805301	0.786411	0.862671
0.660594	0.465672	0.90952	0.145675	0.821762	0.287695	0.46879	0.056685	0.199671	0.0466679	0.786832	0.928957	0.912625	0.0662833	0.646962	0.556361	0.93051	0.948711	0.883035	0.925557	0.900603	0.794222	0.829655	0.795739	0.747031	0.850867	0.625083	0.875468	0.815923	0.179364	0.796676	0.28286	0.779379	0.824543	0.856997	0.874211	0.0463976	0.562668	0.893794	0.830535	0.932218	0.623951	0.877597	0.846157	0.669382	0.795707	0.172505	0.898263	0.766079	0.833313
0.577336	0.520383	0.874538	0.355997	0.814047	0.202298	0.466873	0.0546769	0.248895	0.0445223	0.758387	0.929803	0.895653	0.130581	0.615162	0.493298	0.942081	0.899771	0.878253	0.900043	0.824068	0.766132	0.918686	0.775312	0.753901	0.845874	0.709811	0.874708	0.830664	0.395901	0.784218	0.330915	0.771016	0.806107	0.857244	0.839197	0.0392518	0.566743	0.901086	0.783814	0.946749	0.564534	0.840461	0.843626	0.712187	0.743068	0.492579	0.876517	0.799676	0.830915
0.466753	0.427703	0.894562	0.215795	0.765096	0.176014	0.412592	0.0224194	0.223128	0.0361018	0.835202	0.914335	0.917179	0.0677547	0.583845	0.406745	0.939113	0.945932	0.8839	0.915297	0.847508	0.786938	0.858128	0.823263	0.769913	0.867746	0.672704	0.869479	0.852766	0.301151	0.759215	0.295676	0.783009	0.856975	0.828451	0.827999	0.0473582	0.60511	0.859518	0.808503	0.941954	0.629755	0.842607	0.819914	0.720807	0.737877	0.305946	0.840019	0.76728	0.857803
0.452352	0.458817	0.893623	0.224497	0.789476	0.17814	0.436224	0.0322241	0.23126	0.0637741	0.796205	0.91461	0.903685	0.0721457	0.575323	0.576681	0.927925	0.920518	0.848696	0.910684	0.885652	0.80159	0.871629	0.807495	0.783332	0.850621	0.676483	0.877167	0.844149	0.16477	0.768495	0.27437	0.757006	0.776858	0.800361	0.788894	0.0534505	0.592488	0.895748	0.7703	0.92139	0.546412	0.821302	0.819	0.66211	0.706891	0.38662	0.768279	0.741123	0.797239
0.427247	0.541053	0.873572	0.109527	0.843713	0.155263	0.572626	0.0466733	0.215962	0.0290866	0.849239	0.927487	0.911228	0.0699244	0.607289	0.432421	0.943842	0.936464	0.86336	0.91681	0.802523	0.829118	0.873201	0.810649	0.790105	0.851978	0.678862	0.871911	0.850985	0.165918	0.752136	0.312444	0.816139	0.826545	0.862156	0.849015	0.045657	0.436908	0.856327	0.836303	0.935114	0.612278	0.868617	0.818092	0.642634	0.797252	0.690377	0.801989	0.764283	0.880218
0.415772	0.326977	0.905923	0.0912394	0.849121	0.132368	0.430088	0.0507537	0.125315	0.0397133	0.86264	0.950528	0.907999	0.0613405	0.731197	0.458688	0.939383	0.960514	0.846844	0.899518	0.900765	0.800909	0.781001	0.842195	0.818763	0.897387	0.691327	0.889723	0.844473	0.163504	0.766622	0.228213	0.81488	0.769827	0.721939	0.749033	0.0405347	0.761482	0.855122	0.841709	0.931444	0.663733	0.884851	0.713044	0.743849	0.770732	0.246806	0.868322	0.717034	0.774777
0.515544	0.549493	0.874422	0.359258	0.821151	0.179531	0.435168	0.0377597	0.248774	0.0399995	0.816086	0.929707	0.904996	0.122084	0.656929	0.579792	0.941197	0.92778	0.911844	0.919212	0.88261	0.749493	0.839663	0.801374	0.760893	0.849596	0.637116	0.889663	0.841494	0.232176	0.746954	0.299514	0.768785	0.742659	0.843685	0.78064	0.0578854	0.645177	0.859954	0.816994	0.941464	0.574855	0.861272	0.789376	0.686897	0.748036	0.370974	0.903447	0.796211	0.84876
0.553094	0.538643	0.869641	0.278611	0.809636	0.183979	0.437728	0.0259434	0.231377	0.034483	0.799454	0.919366	0.930157	0.0610965	0.654138	0.523548	0.939295	0.965908	0.862764	0.899241	0.819709	0.80701	0.894648	0.816057	0.779261	0.875588	0.655703	0.874833	0.86645	0.343126	0.769994	0.312886	0.800405	0.771265	0.911736	0.88073	0.0288588	0.591502	0.880014	0.814619	0.943526	0.607729	0.905741	0.794071	0.655158	0.744991	0.304117	0.784125	0.766878	0.829118
0.491643	0.521703	0.856599	0.377717	0.755744	0.27102	0.48928	0.10943	0.247526	0.0660418	0.688895	0.924509	0.852062	0.133586	0.510861	0.580182	0.922535	0.84597	0.83652	0.910379	0.847873	0.7417	0.807778	0.722206	0.637573	0.795213	0.636695	0.869147	0.751368	0.347552	0.7351	0.301368	0.749955	0.852082	0.833602	0.789184	0.060546	0.597366	0.877299	0.788906	0.936017	0.567584	0.738779	0.853934	0.570884	0.745125	0.415326	0.880631	0.75788	0.823454
0.471904	0.413112	0.860251	0.182572	0.786134	0.17397	0.423612	0.0452998	0.232082	0.0389401	0.799661	0.896216	0.899903	0.133555	0.664265	0.405467	0.934788	0.907628	0.885041	0.937827	0.883168	0.754871	0.85028	0.812341	0.76749	0.859352	0.668632	0.874453	0.865413	0.218884	0.757205	0.231999	0.769205	0.809072	0.834984	0.831046	0.0391925	0.52431	0.890875	0.830184	0.939512	0.61353	0.820371	0.853602	0.640311	0.607436	0.416655	0.644015	0.741043	0.90972
0.386521	0.518306	0.884767	0.753481	0.831428	0.182979	0.489842	0.0401919	0.22119	0.0416087	0.820963	0.936788	0.911748	0.0676623	0.641793	0.548463	0.942951	0.937037	0.879093	0.919524	0.888213	0.798941	0.889685	0.819498	0.782505	0.863254	0.631667	0.470764	0.839127	0.120449	0.773522	0.33364	0.815688	0.784044	0.789779	0.683416	0.0416666	0.547282	0.853596	0.7979	0.937713	0.602137	0.857007	0.814326	0.761751	0.783654	0.439235	0.935374	0.779032	0.847886
0.471908	0.605838	0.921084	0.225253	0.830652	0.160989	0.525622	0.0494151	0.18378	0.0365311	0.771463	0.95852	0.923813	0.0681715	0.589905	0.593297	0.944507	0.932784	0.863773	0.927955	0.906462	0.79756	0.872425	0.780035	0.743719	0.854579	0.713813	0.892479	0.855244	0.162484	0.788045	0.199334	0.800312	0.696183	0.803065	0.876884	0.0302556	0.650362	0.84884	0.845316	0.924457	0.556606	0.847922	0.806768	0.632195	0.704565	0.3732	0.905802	0.798949	0.835785
0.496513	0.466352	0.90156	0.246417	0.809192	0.150177	0.479426	0.0299663	0.200893	0.0468745	0.845178	0.929412	0.932276	0.0869162	0.697306	0.399537	0.942223	0.929912	0.86463	0.924803	0.83036	0.799384	0.856268	0.789818	0.774411	0.888943	0.631866	0.886884	0.853907	0.404103	0.782161	0.252638	0.80586	0.740454	0.893218	0.857203	0.03808	0.664408	0.880522	0.817648	0.953072	0.661896	0.84581	0.855247	0.74851	0.736558	0.396707	0.897133	0.757655	0.934033
0.505367	0.366616	0.882567	0.132551	0.784054	0.189843	0.423689	0.0280932	0.238563	0.0369786	0.791928	0.927989	0.906674	0.0790851	0.704495	0.608792	0.92416	0.92353	0.901909	0.892215	0.851071	0.7918	0.813416	0.791155	0.761325	0.849568	0.63402	0.868515	0.839472	0.408012	0.780747	0.309575	0.827403	0.730693	0.87642	0.882344	0.0184634	0.621881	0.898687	0.791286	0.929201	0.603607	0.847447	0.845212	0.736877	0.669316	0.377484	0.758159	0.74512	0.851911
0.559865	0.458882	0.866078	0.238321	0.814074	0.21701	0.412417	0.0437029	0.218998	0.0291834	0.838362	0.905436	0.931321	0.0827641	0.699516	0.622406	0.938426	0.927875	0.845004	0.905451	0.817895	0.760247	0.820084	0.830883	0.793857	0.866148	0.64464	0.899626	0.835395	0.346535	0.758585	0.287429	0.819726	0.848843	0.748565	0.84261	0.0330485	0.565216	0.886339	0.835985	0.941509	0.629788	0.830921	0.817788	0.732789	0.737758	0.384904	0.917259	0.768844	0.821022
0.532961	0.523388	0.870434	0.353173	0.777272	0.203097	0.468038	0.0809927	0.251068	0.0534414	0.70174	0.906965	0.871715	0.156406	0.555293	0.586489	0.9335	0.897888	0.837291	0.915962	0.847707	0.738743	0.891564	0.762828	0.675251	0.814384	0.66455	0.872042	0.80298	0.179663	0.762735	0.286498	0.732458	0.816457	0.808161	0.822537	0.0587702	0.653506	0.858536	0.796059	0.941935	0.532056	0.784831	0.862496	0.617569	0.71164	0.327583	0.878428	0.739583	0.885542
0.472894	0.580014	0.874216	0.264683	0.80822	0.244878	0.46674	0.0858263	0.235868	0.151849	0.725908	0.904012	0.87267	0.158741	0.519856	0.43998	0.913044	0.877937	0.853485	0.887166	0.844954	0.764613	0.866189	0.746896	0.748818	0.793948	0.701925	0.879923	0.797429	0.160336	0.800261	0.307345	0.679814	0.811667	0.775714	0.867034	0.0692812	0.611717	0.843885	0.826174	0.933815	0.546899	0.805408	0.901556	0.615431	0.625264	0.311479	0.88318	0.758698	0.839763
0.426756	0.501774	0.891863	0.205997	0.830017	0.167083	0.398103	0.0315593	0.195529	0.017533	0.827815	0.91557	0.932104	0.0690372	0.692975	0.522848	0.946038	0.949046	0.883161	0.914689	0.809516	0.790825	0.860605	0.821146	0.772869	0.868886	0.651807	0.880478	0.819665	0.305767	0.755468	0.269461	0.801794	0.800647	0.923506	0.863924	0.0216145	0.532129	0.873991	0.8312	0.936745	0.592929	0.870306	0.86963	0.734973	0.792092	0.400699	0.855368	0.768804	0.802069
0.540297	0.530461	0.884579	0.31901	0.79112	0.174925	0.440724	0.0647197	0.221293	0.0564371	0.764248	0.91141	0.862557	0.0874655	0.590286	0.397734	0.951678	0.901245	0.873497	0.879277	0.82099	0.748321	0.860273	0.80667	0.744555	0.82711	0.664737	0.883197	0.856111	0.220677	0.758377	0.321016	0.744801	0.840026	0.830662	0.852373	0.0413959	0.616892	0.889094	0.823255	0.94951	0.568612	0.82697	0.858809	0.634023	0.788535	0.332358	0.806164	0.80168	0.868133
0.506878	0.442865	0.873446	0.215422	0.805053	0.163086	0.425275	0.0458481	0.221194	0.0376972	0.819615	0.925518	0.923312	0.10927	0.667097	0.477643	0.95103	0.953328	0.881033	0.915403	0.813746	0.777804	0.887363	0.783387	0.780187	0.860103	0.645866	0.89463	0.847036	0.197257	0.770478	0.272655	0.810693	0.82421	0.847326	0.866856	0.0487476	0.647302	0.876786	0.81784	0.931926	0.637869	0.848828	0.855788	0.739856	0.712801	0.400504	0.804644	0.753702	0.867152
0.472164	0.429821	0.873129	0.192011	0.785364	0.188023	0.43419	0.0611229	0.225056	0.0636033	0.772711	0.918862	0.889461	0.078919	0.586041	0.572661	0.931729	0.933312	0.909971	0.889559	0.896548	0.769173	0.881695	0.820275	0.801501	0.830179	0.67189	0.866745	0.842268	0.273812	0.744201	0.296416	0.796648	0.791923	0.819975	0.887135	0.0279756	0.548895	0.881334	0.825162	0.94082	0.631554	0.841022	0.85032	0.689749	0.729107	0.317165	0.8833	0.761907	0.892548
0.442547	0.334604	0.899794	0.369408	0.825871	0.181857	0.362599	0.0387492	0.205581	0.0349201	0.859372	0.926734	0.938648	0.100979	0.744537	0.561016	0.949905	0.947556	0.882173	0.895258	0.875975	0.852363	0.84194	0.859131	0.831186	0.898375	0.676006	0.888019	0.828008	0.287773	0.740665	0.277862	0.787179	0.779668	0.794508	0.807793	0.0436076	0.634968	0.860328	0.830083	0.945909	0.643541	0.885738	0.821407	0.688556	0.774454	0.296884	0.87541	0.725513	0.846456
0.53425	0.527879	0.888607	0.21208	0.801706	0.194868	0.475918	0.0410405	0.206797	0.0376926	0.785425	0.932321	0.921605	0.0646995	0.671329	0.581256	0.950262	0.926631	0.890202	0.917906	0.85964	0.771279	0.858759	0.817778	0.798441	0.839809	0.66333	0.837133	0.830015	0.286133	0.757387	0.274555	0.821027	0.865459	0.81607	0.844311	0.0320201	0.665365	0.88567	0.82928	0.944608	0.548552	0.86655	0.860476	0.682561	0.739869	0.313476	0.850868	0.762973	0.829312
0.517349	0.36391	0.881473	0.254627	0.791912	0.193775	0.434771	0.071039	0.241811	0.0325146	0.772045	0.938073	0.90096	0.11098	0.656431	0.495596	0.928088	0.912925	0.850441	0.947697	0.899052	0.779217	0.890393	0.785072	0.798691	0.834312	0.63238	0.864941	0.824946	0.211099	0.752233	0.270293	0.782649	0.823665	0.817185	0.8038	0.0312577	0.525724	0.836986	0.80615	0.96611	0.579209	0.847136	0.839758	0.599515	0.769117	0.313935	0.767951	0.775501	0.85696
0.488165	0.477143	0.894087	0.156502	0.829432	0.191971	0.46857	0.0661391	0.247283	0.0583961	0.813757	0.931393	0.921352	0.0704275	0.67239	0.600542	0.936698	0.945735	0.90454	0.92246	0.845306	0.755024	0.901689	0.814569	0.80538	0.865336	0.637443	0.84122	0.853652	0.259927	0.773249	0.278301	0.782865	0.857966	0.819386	0.837328	0.0343232	0.65398	0.899213	0.8246	0.934401	0.58723	0.836737	0.856781	0.713639	0.77577	0.301563	0.818493	0.723471	0.850416
0.375454	0.408901	0.878602	0.191669	0.802962	0.173573	0.390164	0.0173032	0.222881	0.0281483	0.775533	0.922338	0.89573	0.103035	0.605492	0.42395	0.919713	0.926685	0.844945	0.924018	0.860856	0.745914	0.905264	0.805552	0.742713	0.863984	0.631145	0.856204	0.813043	0.175961	0.797063	0.322407	0.77625	0.884672	0.792797	0.830634	0.0347913	0.640989	0.863576	0.819725	0.944245	0.602147	0.831461	0.818045	0.632826	0.751578	0.301765	0.812777	0.78648	0.839696
0.540391	0.361708	0.911927	0.13689	0.870156	0.146035	0.415618	0.024112	0.218087	0.0272533	0.865116	0.946432	0.941351	0.0817269	0.687287	0.47427	0.932522	0.962971	0.83858	0.883071	0.849934	0.837002	0.893571	0.861199	0.841061	0.906382	0.752369	0.910032	0.882142	0.102155	0.783326	0.238262	0.826822	0.772898	0.728525	0.927876	0.0391745	0.765439	0.903211	0.862357	0.940868	0.648401	0.890839	0.898508	0.778579	0.800044	0.374953	0.917744	0.713513	0.903527
0.480717	0.490277	0.917693	0.16331	0.83352	0.177626	0.412105	0.025755	0.210497	0.0179357	0.849756	0.926459	0.947884	0.072895	0.620511	0.49359	0.950934	0.947662	0.892085	0.912165	0.901353	0.820156	0.881106	0.820589	0.814217	0.881057	0.663215	0.868458	0.866685	0.191491	0.770766	0.217201	0.844949	0.814179	0.812602	0.88383	0.0240819	0.59419	0.895511	0.799045	0.948852	0.634968	0.880685	0.843484	0.684233	0.640879	0.351806	0.844504	0.773071	0.828543
0.443195	0.481472	0.905228	0.267896	0.824291	0.225507	0.401329	0.0541495	0.230663	0.0417314	0.8535	0.924774	0.91747	0.150976	0.67313	0.489924	0.951471	0.9271	0.899286	0.906894	0.81634	0.797118	0.893335	0.796628	0.84038	0.88245	0.642671	0.90034	0.869136	0.279839	0.783242	0.290208	0.857688	0.819648	0.835646	0.805359	0.0265511	0.634137	0.878092	0.806018	0.937913	0.632703	0.856631	0.80589	0.733535	0.774899	0.320451	0.806176	0.765237	0.897288
0.464724	0.40712	0.878541	0.209656	0.744103	0.201177	0.36121	0.0926784	0.233483	0.113115	0.763559	0.903583	0.89866	0.114653	0.6415	0.430383	0.932747	0.925371	0.843724	0.928339	0.811844	0.801562	0.933652	0.796419	0.79239	0.824178	0.616133	0.877394	0.805918	0.338596	0.746184	0.25096	0.742854	0.789568	0.808284	0.855701	0.0500103	0.61366	0.890263	0.799945	0.930782	0.605348	0.784371	0.706767	0.647333	0.739675	0.252459	0.819596	0.748388	0.828414
0.526755	0.378854	0.877448	0.149805	0.765617	0.190188	0.538239	0.0440558	0.244767	0.042486	0.82862	0.926609	0.908052	0.0749934	0.6599	0.580179	0.962351	0.932516	0.855438	0.925084	0.830916	0.780884	0.887479	0.833283	0.791186	0.870573	0.635192	0.874665	0.851295	0.196578	0.753331	0.300593	0.795068	0.764191	0.709066	0.857052	0.0345973	0.59128	0.840114	0.806771	0.937967	0.618582	0.865182	0.82422	0.733254	0.756407	0.323416	0.877395	0.80265	0.855543
0.66352	0.489295	0.885683	0.264624	0.834309	0.213857	0.478262	0.0679925	0.222411	0.0362852	0.730651	0.921336	0.849408	0.114201	0.625129	0.518677	0.933611	0.936587	0.871235	0.8755	0.844006	0.745766	0.82433	0.764361	0.729508	0.823792	0.670102	0.920607	0.820849	0.292249	0.74072	0.260288	0.757587	0.810768	0.791521	0.858364	0.0475804	0.653253	0.860043	0.826701	0.927683	0.631341	0.795337	0.865496	0.619876	0.760704	0.405837	0.876878	0.80874	0.926206
0.431408	0.475956	0.875035	0.307931	0.817056	0.189383	0.434416	0.0273284	0.210307	0.0260442	0.782206	0.921373	0.877866	0.0832787	0.630857	0.552869	0.912946	0.910803	0.875016	0.888527	0.686628	0.732268	0.888233	0.79381	0.745041	0.848527	0.639643	0.863501	0.834869	0.398402	0.770835	0.273142	0.809438	0.792777	0.878347	0.838151	0.0364563	0.618112	0.870603	0.807615	0.923321	0.573897	0.820063	0.868039	0.708126	0.75712	0.331667	0.855125	0.7678	0.858757
0.502423	0.566948	0.847588	0.245723	0.787461	0.204138	0.376851	0.0809368	0.252438	0.0748163	0.732089	0.928912	0.868327	0.118707	0.599662	0.429397	0.92277	0.879851	0.830433	0.918572	0.75443	0.732264	0.84566	0.782821	0.694737	0.80406	0.620971	0.845521	0.798012	0.331916	0.739525	0.280817	0.732855	0.769091	0.780457	0.832212	0.087983	0.662456	0.877406	0.797242	0.916119	0.547902	0.795666	0.825167	0.595237	0.750543	0.346956	0.773775	0.732019	0.773157
0.500997	0.513262	0.869021	0.269364	0.777875	0.251339	0.431775	0.0971669	0.282378	0.154273	0.739779	0.925431	0.880089	0.11093	0.569283	0.516313	0.938972	0.855339	0.880402	0.905621	0.854845	0.806856	0.924004	0.762613	0.733685	0.801315	0.636084	0.881663	0.794649	0.26739	0.743766	0.293877	0.769705	0.825776	0.836692	0.854697	0.149677	0.469023	0.832807	0.802588	0.912869	0.582575	0.824869	0.872435	0.659416	0.729346	0.387662	0.765554	0.743872	0.86619
0.47636	0.469791	0.895367	0.237827	0.778467	0.165233	0.403272	0.0470866	0.218199	0.031747	0.784848	0.926633	0.903841	0.0837995	0.643035	0.616949	0.941295	0.931658	0.84187	0.891435	0.827051	0.789715	0.861537	0.78105	0.769509	0.855623	0.664402	0.862642	0.828936	0.231675	0.758738	0.268107	0.806486	0.731208	0.81624	0.849985	0.0330239	0.54698	0.90236	0.78058	0.944347	0.602114	0.838853	0.8234	0.626358	0.710882	0.344868	0.763716	0.721128	0.831405
0.454011	0.478308	0.865237	0.352132	0.821947	0.152848	0.455047	0.0395713	0.218816	0.0375675	0.845566	0.941934	0.899066	0.0873867	0.686854	0.454973	0.932789	0.932763	0.915181	0.914736	0.809866	0.788772	0.88666	0.813554	0.766998	0.841155	0.637741	0.875631	0.851107	0.227823	0.773571	0.289427	0.797609	0.777048	0.870784	0.85828	0.040265	0.508046	0.847093	0.800708	0.94267	0.618889	0.863195	0.811398	0.710635	0.765324	0.366538	0.745937	0.756325	0.845525
0.486782	0.50429	0.883084	0.296834	0.820378	0.153468	0.485216	0.030237	0.235708	0.0341091	0.802609	0.91743	0.922882	0.116133	0.608039	0.543569	0.92711	0.943843	0.843566	0.908083	0.82612	0.799129	0.888123	0.806259	0.76721	0.872579	0.614704	0.881955	0.837187	0.348564	0.743468	0.310186	0.774103	0.808166	0.875174	0.863293	0.0532513	0.610056	0.876661	0.800342	0.93092	0.573099	0.834873	0.855985	0.645941	0.766734	0.44255	0.874896	0.751498	0.905077
0.525498	0.572613	0.89004	0.299904	0.813651	0.219144	0.40542	0.0741861	0.235756	0.0577668	0.7497	0.913105	0.900705	0.127144	0.597162	0.601652	0.928833	0.920415	0.845122	0.861282	0.76407	0.772368	0.88975	0.816758	0.755242	0.813854	0.627235	0.880647	0.854493	0.289678	0.757634	0.265355	0.825003	0.700939	0.801001	0.860298	0.0646932	0.632709	0.907017	0.810083	0.925491	0.557479	0.845489	0.881428	0.642114	0.669612	0.306012	0.874477	0.721507	0.799769
0.506996	0.470733	0.877685	0.254694	0.775647	0.199292	0.474058	0.055299	0.232517	0.0878224	0.759026	0.917589	0.883185	0.0922587	0.629718	0.411613	0.924343	0.907109	0.847157	0.849482	0.863817	0.753159	0.887076	0.773778	0.74876	0.800087	0.650175	0.860831	0.833467	0.220074	0.74981	0.261428	0.742111	0.782017	0.822747	0.868439	0.0324229	0.580893	0.885039	0.816217	0.906607	0.530668	0.867798	0.820597	0.652906	0.702426	0.274773	0.847198	0.722451	0.895378
0.500826	0.536934	0.873749	0.322216	0.830872	0.178264	0.477061	0.0418434	0.214006	0.066828	0.798704	0.922974	0.910271	0.139361	0.593717	0.515385	0.953671	0.939508	0.882208	0.910588	0.839957	0.732023	0.851666	0.802862	0.787973	0.861108	0.66759	0.874548	0.831666	0.302538	0.742998	0.287577	0.778479	0.885595	0.811143	0.828209	0.043492	0.586497	0.881759	0.814521	0.927532	0.601596	0.822675	0.870698	0.732631	0.742543	0.326441	0.872455	0.789334	0.828592
0.684064	0.384237	0.899785	0.2055	0.823905	0.192702	0.464145	0.0329945	0.234069	0.0336969	0.837719	0.920787	0.940935	0.0650194	0.606083	0.53921	0.938049	0.934593	0.861533	0.925552	0.906221	0.811673	0.872877	0.829215	0.804979	0.872581	0.670597	0.880339	0.825599	0.224208	0.80016	0.281142	0.801115	0.74146	0.819901	0.874012	0.0341642	0.555359	0.899189	0.810876	0.944431	0.617783	0.84787	0.792615	0.712768	0.76047	0.32594	0.898663	0.778022	0.917781
0.44877	0.405561	0.86924	0.19985	0.838253	0.185342	0.45441	0.0343302	0.220475	0.0560337	0.751936	0.936715	0.899925	0.0899687	0.607667	0.555617	0.945655	0.928256	0.822397	0.90217	0.874798	0.80198	0.880103	0.812005	0.771439	0.835489	0.676066	0.862548	0.848429	0.338536	0.799844	0.247145	0.760592	0.776374	0.816722	0.825284	0.0521432	0.524058	0.839225	0.844958	0.959029	0.646396	0.831865	0.852799	0.717569	0.705305	0.262875	0.833376	0.770883	0.954701
0.504084	0.519746	0.876319	0.302467	0.803672	0.21365	0.414619	0.0474171	0.245782	0.0612861	0.816597	0.924211	0.901458	0.0765923	0.697539	0.442735	0.932488	0.92983	0.863581	0.871143	0.828761	0.801982	0.850471	0.816992	0.817198	0.848791	0.660252	0.885915	0.854234	0.0894195	0.754966	0.241623	0.811245	0.925867	0.824154	0.854089	0.0351142	0.521667	0.852985	0.786629	0.917247	0.635217	0.882598	0.861432	0.736491	0.774942	0.303178	0.771163	0.770855	0.872243
0.545222	0.641082	0.890943	0.174795	0.822748	0.162932	0.372222	0.0470208	0.166309	0.0753789	0.791455	0.93676	0.898459	0.0657532	0.639056	0.5384	0.935564	0.922581	0.809476	0.90941	0.881602	0.745253	0.860921	0.823503	0.793229	0.853877	0.730741	0.886304	0.810335	0.165673	0.782035	0.236498	0.738055	0.728119	0.796787	0.902766	0.0283635	0.735349	0.835379	0.829978	0.941966	0.487588	0.856851	0.874418	0.649009	0.77469	0.389917	0.927213	0.818358	0.794997
0.543402	0.538727	0.868696	0.236309	0.799495	0.203182	0.442579	0.048082	0.210143	0.0350202	0.806166	0.900889	0.923395	0.156256	0.636381	0.412135	0.949384	0.937338	0.834883	0.923507	0.831119	0.789982	0.821083	0.776466	0.790994	0.854548	0.679214	0.875547	0.844184	0.354496	0.731229	0.243731	0.772362	0.794913	0.793691	0.834511	0.0425376	0.663496	0.86433	0.825197	0.931619	0.605751	0.866747	0.888022	0.733894	0.753905	0.245695	0.850328	0.758711	0.850378
0.432784	0.488077	0.912252	0.146267	0.80599	0.165488	0.387404	0.0548598	0.235213	0.0539128	0.819106	0.937921	0.909168	0.0852035	0.594946	0.398749	0.960001	0.93595	0.922524	0.928506	0.896741	0.78131	0.89185	0.876798	0.799398	0.856877	0.677241	0.894367	0.848949	0.227502	0.726579	0.272771	0.806174	0.814582	0.82935	0.877396	0.0329697	0.486665	0.870774	0.816194	0.94064	0.588094	0.869064	0.819938	0.667344	0.712078	0.313239	0.824472	0.785999	0.913186
0.474994	0.445911	0.868263	0.322751	0.790705	0.19678	0.371993	0.0503898	0.223794	0.0316248	0.757617	0.904329	0.902609	0.0848022	0.653617	0.545398	0.937146	0.939159	0.901236	0.938845	0.757602	0.770828	0.87686	0.79484	0.761939	0.841912	0.626314	0.8608	0.831732	0.296963	0.737407	0.267509	0.76487	0.798464	0.75247	0.825	0.0290551	0.520703	0.863864	0.797657	0.930922	0.618599	0.855803	0.777692	0.681138	0.743618	0.292732	0.807288	0.731636	0.798009
0.453214	0.603175	0.861147	0.261565	0.750759	0.291067	0.377159	0.122087	0.255146	0.24017	0.662177	0.924683	0.858066	0.115877	0.575181	0.661674	0.901602	0.862076	0.68372	0.89201	0.73502	0.692498	0.837587	0.733921	0.742858	0.798302	0.655539	0.888096	0.809231	0.236491	0.757644	0.254665	0.761598	0.772383	0.809685	0.85153	0.092006	0.661834	0.868326	0.804831	0.91084	0.570795	0.786011	0.826213	0.563205	0.735718	0.317829	0.834892	0.76142	0.767094
0.535671	0.417854	0.880794	0.380957	0.823706	0.192195	0.421378	0.0296865	0.218317	0.0424186	0.814607	0.922881	0.909886	0.152493	0.671613	0.605507	0.942401	0.930686	0.837731	0.893747	0.772066	0.776762	0.894385	0.790989	0.720447	0.832369	0.626106	0.871297	0.865057	0.261128	0.751836	0.275682	0.840333	0.704766	0.853232	0.84125	0.0402429	0.626852	0.867665	0.806471	0.932301	0.608544	0.852612	0.827282	0.702891	0.733039	0.279858	0.863439	0.723078	0.798515
0.474036	0.43119	0.890889	0.308769	0.806792	0.196768	0.460692	0.0447277	0.242165	0.0312593	0.801662	0.907453	0.89975	0.121702	0.658991	0.646407	0.933269	0.91815	0.832201	0.917746	0.822952	0.77977	0.878286	0.792332	0.769149	0.86208	0.664247	0.889912	0.83047	0.28805	0.738383	0.310129	0.759618	0.862351	0.87203	0.829503	0.0391927	0.582377	0.847719	0.801026	0.919413	0.634388	0.816232	0.749274	0.675937	0.733314	0.348899	0.780544	0.737365	0.835037
0.499905	0.501213	0.875373	0.243718	0.805045	0.226578	0.501073	0.0592435	0.261697	0.0719256	0.749315	0.922436	0.845363	0.0947649	0.600826	0.456457	0.919547	0.881075	0.837777	0.898377	0.781979	0.695883	0.858741	0.780505	0.730455	0.80405	0.664717	0.872503	0.813228	0.246231	0.760978	0.274617	0.763652	0.790053	0.76874	0.857191	0.0381525	0.691299	0.884545	0.822326	0.903662	0.553	0.815452	0.65935	0.605769	0.707715	0.319257	0.885314	0.685128	0.787521
0.543258	0.464249	0.899202	0.175088	0.802935	0.161452	0.392941	0.0322605	0.199015	0.0456	0.816201	0.924861	0.91863	0.0712706	0.59515	0.613398	0.93788	0.939004	0.837991	0.903482	0.816202	0.887592	0.844121	0.83524	0.790613	0.850277	0.651087	0.885984	0.846623	0.23738	0.770835	0.256079	0.806551	0.868268	0.797517	0.859857	0.0297952	0.614329	0.877262	0.838695	0.946281	0.54178	0.860175	0.789831	0.692993	0.720243	0.367782	0.87999	0.767363	0.825179
0.496973	0.382143	0.872933	0.304986	0.800424	0.201803	0.439334	0.0572266	0.204486	0.0591507	0.771419	0.925687	0.886223	0.112828	0.621507	0.47757	0.933673	0.911995	0.875535	0.905741	0.85216	0.744325	0.881166	0.797057	0.767921	0.830605	0.624432	0.87757	0.824831	0.168261	0.730284	0.259007	0.776172	0.821437	0.85545	0.883938	0.0471375	0.625687	0.894512	0.81596	0.943112	0.624075	0.831305	0.86283	0.690441	0.740541	0.272571	0.900033	0.773923	0.862139
0.519221	0.46642	0.906234	0.309229	0.812782	0.158375	0.393801	0.0372023	0.208853	0.0229302	0.856595	0.930658	0.906441	0.0698392	0.629533	0.440182	0.954472	0.942042	0.90361	0.908675	0.802903	0.760038	0.892062	0.834155	0.789197	0.874705	0.64973	0.854818	0.855599	0.207388	0.780738	0.263554	0.839671	0.752773	0.813852	0.85416	0.0348755	0.599923	0.879414	0.787369	0.943142	0.616645	0.876096	0.789096	0.706466	0.762338	0.448305	0.871726	0.714546	0.861511
0.478224	0.487265	0.927356	0.201584	0.853174	0.170087	0.399713	0.0420451	0.154914	0.0321783	0.801046	0.94558	0.898823	0.0939632	0.605938	0.552144	0.929704	0.938183	0.79341	0.896838	0.916933	0.826441	0.782347	0.829439	0.792427	0.862453	0.674815	0.901511	0.813267	0.366991	0.809551	0.195269	0.847123	0.787902	0.767792	0.887638	0.0444324	0.567324	0.843485	0.844569	0.921728	0.522471	0.855996	0.832151	0.669256	0.698417	0.232244	0.907359	0.729588	0.816559
0.49038	0.476685	0.862041	0.184474	0.78107	0.181029	0.389562	0.0306977	0.210987	0.0497106	0.851803	0.906634	0.916508	0.0801614	0.652104	0.551242	0.947585	0.95774	0.924168	0.880485	0.863775	0.787443	0.885552	0.801506	0.791921	0.890713	0.634446	0.878406	0.817374	0.148665	0.784972	0.255897	0.807154	0.846449	0.817297	0.87957	0.025298	0.578481	0.844853	0.809371	0.932882	0.566227	0.864188	0.821045	0.742842	0.719366	0.34898	0.743229	0.744564	0.855302
0.474059	0.460164	0.891407	0.20686	0.801673	0.177694	0.373455	0.0343212	0.212667	0.0431861	0.839611	0.915243	0.909868	0.0671215	0.661001	0.517164	0.947495	0.950832	0.891909	0.906682	0.838245	0.808907	0.82309	0.833857	0.804566	0.869959	0.621715	0.864684	0.842586	0.140704	0.766162	0.303685	0.818668	0.787567	0.832373	0.805928	0.0410438	0.348201	0.848971	0.782052	0.940294	0.68243	0.876562	0.831407	0.690415	0.634296	0.404178	0.861548	0.738563	0.819158
0.69182	0.485486	0.912862	0.36903	0.87915	0.176339	0.472279	0.0238804	0.181141	0.0355683	0.851779	0.935143	0.918524	0.0670838	0.56013	0.538855	0.944706	0.950295	0.874046	0.881288	0.909966	0.811146	0.798521	0.852039	0.779114	0.904251	0.706954	0.924243	0.876069	0.288607	0.754729	0.242012	0.795909	0.822259	0.759062	0.844894	0.0209904	0.73349	0.870898	0.872935	0.953239	0.587007	0.869718	0.857965	0.699971	0.791788	0.340626	0.908915	0.751209	0.848357
0.37603	0.402888	0.850208	0.174013	0.805472	0.170516	0.404058	0.0734933	0.190144	0.0217302	0.799829	0.940507	0.894936	0.281737	0.660868	0.542609	0.934442	0.886529	0.861083	0.881476	0.834809	0.773341	0.876073	0.78138	0.75274	0.832952	0.661498	0.859547	0.829304	0.184295	0.747487	0.290397	0.809528	0.683808	0.810006	0.820523	0.0236955	0.791843	0.890224	0.808648	0.948347	0.62186	0.815023	0.84241	0.640214	0.726897	0.263727	0.89501	0.766332	0.843074
0.490836	0.452816	0.901164	0.210336	0.79257	0.148202	0.350845	0.0361841	0.205096	0.0228464	0.826714	0.912938	0.931215	0.0728219	0.651153	0.405165	0.960968	0.93229	0.883561	0.879724	0.822444	0.788347	0.844648	0.830685	0.798803	0.855983	0.65773	0.876026	0.853876	0.306432	0.804468	0.298547	0.828362	0.773402	0.825478	0.862663	0.0407186	0.478221	0.821839	0.79859	0.940115	0.640966	0.864254	0.848304	0.703637	0.707378	0.362231	0.810648	0.743541	0.878455
0.409476	0.45378	0.864786	0.217529	0.772957	0.166971	0.440018	0.0527869	0.242883	0.045329	0.765373	0.922023	0.881339	0.105561	0.621554	0.425336	0.949429	0.917044	0.887932	0.881616	0.849662	0.768361	0.81565	0.80298	0.78071	0.805653	0.660497	0.87962	0.829471	0.137884	0.722172	0.28314	0.782852	0.800683	0.833326	0.860742	0.0404062	0.524407	0.863042	0.82168	0.920479	0.628932	0.827115	0.854069	0.704291	0.760688	0.297878	0.716086	0.729388	0.852406
0.487844	0.465913	0.865727	0.467326	0.811566	0.217966	0.414958	0.0812093	0.240975	0.106923	0.772224	0.935622	0.872874	0.10111	0.628733	0.545079	0.927206	0.90372	0.853137	0.896942	0.832453	0.721099	0.907616	0.773514	0.732327	0.850859	0.670791	0.866624	0.810031	0.289796	0.799564	0.282782	0.796802	0.876982	0.846184	0.880388	0.0837675	0.595987	0.882789	0.795488	0.931096	0.553948	0.795069	0.856284	0.635375	0.720382	0.355215	0.876541	0.724329	0.913932
0.459421	0.4665	0.883187	0.258187	0.830783	0.185184	0.382148	0.0404935	0.247694	0.0245727	0.81895	0.939512	0.935004	0.0899883	0.653632	0.547828	0.939071	0.941182	0.881371	0.90434	0.883904	0.775404	0.848551	0.814537	0.819453	0.840562	0.655142	0.872959	0.844071	0.141464	0.740028	0.220093	0.778738	0.718124	0.686582	0.886613	0.0359398	0.54635	0.894266	0.777761	0.95716	0.608344	0.831026	0.787665	0.714007	0.75135	0.210873	0.876726	0.742676	0.882271
0.502984	0.511747	0.874693	0.314174	0.823347	0.175827	0.46248	0.0586782	0.239431	0.0540554	0.804248	0.937595	0.903857	0.0965921	0.665084	0.511249	0.941339	0.921475	0.855601	0.924816	0.847537	0.768393	0.929572	0.815545	0.783558	0.872342	0.668134	0.892814	0.820869	0.26916	0.782416	0.276388	0.797283	0.746081	0.772022	0.831963	0.0307104	0.65788	0.840889	0.793463	0.93405	0.609987	0.835626	0.875532	0.658639	0.738473	0.404713	0.834213	0.762616	0.903776
0.498583	0.429045	0.868892	0.277795	0.801284	0.163692	0.395028	0.050428	0.228053	0.064983	0.756909	0.935118	0.862403	0.0706723	0.623446	0.585187	0.948384	0.887014	0.864426	0.905865	0.752837	0.758268	0.878723	0.786646	0.765562	0.811503	0.66894	0.877573	0.807958	0.260374	0.744294	0.325028	0.762367	0.852583	0.865223	0.834291	0.0427651	0.767461	0.854681	0.777527	0.934803	0.687567	0.824024	0.683605	0.675266	0.732269	0.342978	0.849943	0.763432	0.841078
0.540169	0.522708	0.878863	0.194105	0.839119	0.176041	0.427148	0.0445739	0.258284	0.0391591	0.82137	0.91519	0.913295	0.100273	0.623889	0.58232	0.899635	0.926964	0.878301	0.911369	0.83502	0.817351	0.914811	0.828647	0.781695	0.845242	0.704237	0.895098	0.802197	0.342886	0.766003	0.328704	0.77419	0.813694	0.840506	0.801149	0.0910582	0.734684	0.867892	0.819304	0.940945	0.546746	0.82311	0.827777	0.660451	0.71486	0.365017	0.89517	0.80273	0.898117
0.374113	0.450423	0.893813	0.17325	0.818572	0.148822	0.599785	0.0336243	0.20772	0.0338844	0.785764	0.924442	0.941239	0.0787433	0.590667	0.694788	0.914017	0.948758	0.856434	0.904307	0.902343	0.794201	0.889011	0.810681	0.782611	0.883921	0.664814	0.904327	0.836695	0.180156	0.793953	0.210129	0.802737	0.859652	0.866568	0.912654	0.0264725	0.782541	0.896047	0.809219	0.933305	0.644995	0.824629	0.877762	0.70386	0.812106	0.214132	0.819385	0.803881	0.852651
0.436752	0.527779	0.909508	0.179162	0.814144	0.209148	0.448908	0.0895741	0.251572	0.048622	0.759035	0.916233	0.90896	0.145709	0.623308	0.418832	0.924302	0.933861	0.863671	0.91702	0.833526	0.759033	0.900345	0.818065	0.759999	0.868118	0.613727	0.866438	0.819029	0.166472	0.674692	0.273088	0.813218	0.731681	0.784115	0.860841	0.056775	0.568931	0.873101	0.82595	0.919543	0.641685	0.80839	0.769845	0.595706	0.700997	0.39159	0.854303	0.724254	0.849189
0.451949	0.456317	0.880105	0.206312	0.817521	0.208916	0.445968	0.039911	0.243235	0.0278347	0.800282	0.880957	0.920318	0.088766	0.751517	0.395347	0.951501	0.909387	0.882053	0.919123	0.87071	0.773332	0.883385	0.819102	0.802635	0.870172	0.668988	0.889229	0.876	0.189253	0.774556	0.291988	0.829376	0.829724	0.814857	0.850323	0.0378427	0.645745	0.876144	0.80626	0.940917	0.602793	0.848375	0.840255	0.655442	0.766751	0.488383	0.881144	0.762641	0.908324
0.461215	0.49226	0.880925	0.222022	0.817504	0.198808	0.38693	0.0411032	0.205629	0.0494032	0.832006	0.91214	0.88844	0.0848544	0.700075	0.589911	0.943202	0.942308	0.876867	0.916723	0.864765	0.782885	0.937346	0.809571	0.831945	0.869477	0.678916	0.892633	0.866127	0.160274	0.753838	0.27868	0.803699	0.885778	0.85598	0.85083	0.0513716	0.605999	0.882355	0.808154	0.922429	0.653126	0.863742	0.815201	0.761952	0.776267	0.297149	0.879995	0.715088	0.906392
0.48051	0.505053	0.885067	0.147666	0.81816	0.185797	0.420543	0.0283233	0.211416	0.0212912	0.873256	0.913454	0.936975	0.0681208	0.613983	0.444209	0.955511	0.945262	0.888651	0.881011	0.882368	0.798982	0.891506	0.801974	0.795554	0.861029	0.657747	0.895524	0.84588	0.176409	0.80225	0.301724	0.827459	0.818635	0.898719	0.846378	0.0296681	0.556821	0.850455	0.783467	0.929535	0.603795	0.875824	0.790942	0.682052	0.672947	0.356321	0.728649	0.766286	0.872926
0.449705	0.532538	0.870205	0.271301	0.790154	0.170256	0.416588	0.0564093	0.254945	0.0541571	0.787018	0.908053	0.887743	0.136649	0.623076	0.559206	0.948906	0.904575	0.883234	0.919942	0.867593	0.744143	0.902466	0.793249	0.753041	0.814864	0.655033	0.895168	0.813872	0.426171	0.779086	0.321086	0.790255	0.825605	0.834803	0.816482	0.0703362	0.622638	0.882951	0.797185	0.934636	0.591422	0.832073	0.82554	0.677562	0.791812	0.388256	0.923117	0.775632	0.904832
0.572047	0.440121	0.927584	0.29496	0.848342	0.168245	0.366491	0.0242669	0.233155	0.0386133	0.837908	0.942577	0.917998	0.0803522	0.619944	0.489512	0.947508	0.944282	0.785399	0.881314	0.905723	0.800347	0.780327	0.81944	0.816572	0.886305	0.696957	0.882573	0.851568	0.129378	0.776083	0.287855	0.811525	0.828039	0.777797	0.913483	0.0317999	0.621721	0.847881	0.857056	0.922551	0.635941	0.847202	0.870899	0.70609	0.714415	0.326913	0.919331	0.778879	0.838173
0.448887	0.419866	0.889252	0.279071	0.828556	0.187803	0.49917	0.0439275	0.206982	0.0339828	0.792701	0.924847	0.889677	0.073982	0.668897	0.523377	0.948167	0.918683	0.883765	0.919036	0.845701	0.758903	0.887428	0.787194	0.718716	0.849339	0.633377	0.880271	0.824213	0.326442	0.742135	0.257453	0.790206	0.889124	0.757503	0.859035	0.026888	0.623569	0.887997	0.811404	0.947623	0.59336	0.801303	0.783906	0.587055	0.732655	0.263446	0.825205	0.746632	0.800297
0.496019	0.437038	0.886014	0.239708	0.795017	0.188797	0.434653	0.0447604	0.237312	0.0257707	0.785121	0.935424	0.917613	0.0647988	0.678648	0.550576	0.923335	0.932081	0.876656	0.895865	0.756054	0.76502	0.83886	0.783193	0.744696	0.88276	0.675178	0.868738	0.828073	0.266476	0.782383	0.277245	0.809862	0.78592	0.878056	0.835378	0.0296777	0.574838	0.861713	0.801945	0.923245	0.612879	0.847478	0.833497	0.708553	0.756041	0.299776	0.79011	0.733398	0.865111
0.588058	0.43977	0.850938	0.212376	0.787998	0.35007	0.467402	0.0777852	0.22022	0.0753852	0.728227	0.90161	0.856101	0.0507671	0.602254	0.51006	0.952557	0.903558	0.888942	0.877121	0.796844	0.751575	0.875673	0.767216	0.754919	0.776227	0.663287	0.86836	0.817453	0.240574	0.74595	0.277637	0.787307	0.854232	0.87059	0.826942	0.0498814	0.406843	0.857409	0.833331	0.934439	0.606848	0.805155	0.760865	0.616844	0.727687	0.257225	0.839089	0.724844	0.893963
0.478461	0.467368	0.894019	0.141963	0.799121	0.240224	0.317529	0.0584144	0.241866	0.0475044	0.728255	0.927979	0.894674	0.0980409	0.640631	0.601382	0.937581	0.915873	0.839278	0.933123	0.823655	0.70391	0.850964	0.756728	0.712367	0.820699	0.6205	0.895168	0.777312	0.183971	0.76903	0.306625	0.801906	0.723462	0.822153	0.874319	0.0358849	0.657238	0.849686	0.795032	0.921757	0.57224	0.858009	0.803799	0.618184	0.732346	0.161313	0.793973	0.695303	0.864229
0.517652	0.445564	0.872604	0.283031	0.806491	0.175174	0.461231	0.071495	0.224002	0.0356531	0.754171	0.918379	0.882893	0.118679	0.593971	0.590207	0.917042	0.941642	0.838234	0.923537	0.870198	0.771221	0.840502	0.792781	0.751531	0.840014	0.643869	0.876641	0.829412	0.275238	0.757757	0.253518	0.733408	0.837599	0.728985	0.864512	0.0658879	0.629563	0.864285	0.801779	0.92638	0.567847	0.828947	0.835897	0.575107	0.725917	0.406644	0.827952	0.741872	0.831367
0.558944	0.533789	0.896452	0.213076	0.820377	0.131461	0.34128	0.091067	0.190492	0.0623925	0.791613	0.935685	0.906037	0.108058	0.643744	0.6141	0.954067	0.927171	0.858645	0.868951	0.840409	0.774922	0.859491	0.809128	0.812061	0.828661	0.664423	0.890723	0.852048	0.260538	0.792762	0.26083	0.759322	0.750426	0.779536	0.843754	0.0535826	0.576883	0.894051	0.85619	0.928892	0.534549	0.866656	0.834501	0.635301	0.791694	0.220483	0.871508	0.702222	0.773549
0.433264	0.433423	0.88777	0.189406	0.80364	0.253922	0.429249	0.108404	0.241129	0.0598588	0.749521	0.931461	0.861483	0.0995631	0.638741	0.561828	0.929612	0.877732	0.83385	0.915386	0.808133	0.712001	0.849666	0.763598	0.715899	0.833294	0.620972	0.854953	0.79124	0.184187	0.761608	0.270944	0.770437	0.786635	0.868755	0.780288	0.0335617	0.597019	0.847747	0.80626	0.92856	0.575242	0.847973	0.745613	0.654136	0.703992	0.249685	0.802729	0.802774	0.83938
0.434483	0.430694	0.894284	0.229454	0.803023	0.15499	0.45927	0.0447423	0.187757	0.0429285	0.814112	0.34888	0.918437	0.065199	0.680086	0.479345	0.953506	0.944499	0.868765	0.976433	0.86516	0.802973	0.825798	0.825124	0.770389	0.853059	0.638938	0.885546	0.849129	0.463814	0.763772	0.301669	0.801576	0.85114	0.894499	0.850429	0.0472362	0.674113	0.875049	0.82521	0.943803	0.609792	0.852123	0.822892	0.674624	0.716106	0.325585	0.761331	0.771373	0.869695
0.539769	0.458796	0.842304	0.243908	0.805512	0.159072	0.421538	0.0851277	0.241342	0.0318169	0.741382	0.883517	0.879028	0.108883	0.542565	0.513068	0.917141	0.890707	0.794797	0.890664	0.767153	0.752783	0.829531	0.806149	0.720563	0.855764	0.669016	0.849052	0.819331	0.259065	0.748713	0.203928	0.742098	0.577446	0.848838	0.862659	0.0715328	0.520033	0.895699	0.795688	0.935369	0.556389	0.818502	0.766147	0.697619	0.729861	0.25246	0.875038	0.674101	0.792681
0.498164	0.472573	0.888111	0.184116	0.844127	0.194691	0.432429	0.0291324	0.216806	0.0165181	0.83042	0.896829	0.894063	0.0923062	0.606536	0.634822	0.925858	0.928017	0.899429	0.853712	0.808574	0.730532	0.849385	0.790338	0.778011	0.86945	0.684169	0.858252	0.844233	0.0999865	0.750655	0.270757	0.786916	0.783048	0.814762	0.857167	0.0760553	0.656557	0.898931	0.803791	0.920101	0.602478	0.845914	0.801082	0.673594	0.711745	0.309812	0.869082	0.680053	0.838719
0.444966	0.517343	0.889123	0.222815	0.838942	0.145198	0.4443	0.0249903	0.221462	0.0263483	0.82803	0.925326	0.923019	0.0870515	0.637637	0.508633	0.94766	0.945236	0.870338	0.928471	0.880811	0.819657	0.828145	0.824672	0.791886	0.875241	0.667419	0.870625	0.857106	0.170465	0.751551	0.271228	0.799364	0.854261	0.709023	0.815263	0.0298277	0.709792	0.843872	0.81388	0.937154	0.613788	0.8782	0.775505	0.698771	0.718833	0.388437	0.815966	0.762774	0.880367
0.450613	0.37404	0.914459	0.297088	0.858338	0.171925	0.611088	0.0393844	0.163066	0.036457	0.878638	0.948105	0.89333	0.0943131	0.583752	0.621953	0.943774	0.931933	0.852726	0.88096	0.869382	0.802048	0.878869	0.842068	0.829638	0.887471	0.669186	0.920719	0.834796	0.118685	0.77115	0.220703	0.761461	0.782686	0.716184	0.857345	0.0269553	0.532035	0.907412	0.893515	0.924459	0.53409	0.872454	0.90728	0.667418	0.795527	0.207552	0.953522	0.782049	0.890506
0.53385	0.440504	0.883654	0.217163	0.804916	0.153388	0.431061	0.0359426	0.220864	0.0533323	0.805037	0.917144	0.886999	0.108536	0.68646	0.431053	0.937397	0.917335	0.871875	0.884716	0.806643	0.773055	0.882693	0.817281	0.75702	0.803053	0.644687	0.868821	0.839922	0.234242	0.763192	0.267485	0.813912	0.734528	0.822121	0.827082	0.0610145	0.570042	0.868341	0.819331	0.934627	0.631185	0.835837	0.860673	0.676767	0.726007	0.38543	0.8086	0.761371	0.87301
0.505881	0.508996	0.851778	0.309433	0.759673	0.21619	0.3792	0.0954389	0.27044	0.0644258	0.71633	0.925146	0.849771	0.165715	0.559769	0.551322	0.928852	0.861477	0.88494	0.901813	0.840871	0.685682	0.833058	0.808585	0.711341	0.815167	0.644214	0.873924	0.785977	0.264605	0.738125	0.297283	0.752675	0.777417	0.833584	0.814202	0.0651784	0.612629	0.85627	0.805581	0.920639	0.565737	0.814434	0.832323	0.619191	0.686415	0.288043	0.845754	0.770022	0.860788
0.600524	0.508517	0.877878	0.285206	0.792906	0.205929	0.419585	0.0666452	0.248256	0.100874	0.742405	0.91408	0.869157	0.164453	0.649426	0.434043	0.929829	0.891775	0.874075	0.907303	0.845241	0.776285	0.903949	0.771371	0.753112	0.857826	0.645326	0.875604	0.825455	0.278205	0.804035	0.288176	0.777598	0.855672	0.823268	0.86687	0.0741486	0.531508	0.860345	0.8051	0.947256	0.566648	0.826122	0.875949	0.667979	0.723622	0.351757	0.870706	0.770969	0.883637
0.564506	0.497648	0.887878	0.224659	0.838269	0.152583	0.427262	0.0791363	0.195046	0.0537791	0.828397	0.933866	0.903934	0.0991618	0.727973	0.559926	0.939502	0.927363	0.854726	0.895605	0.852016	0.801557	0.863385	0.814885	0.798572	0.89945	0.680925	0.879473	0.827814	0.226881	0.820543	0.279758	0.833777	0.851242	0.888382	0.871406	0.0478757	0.589829	0.869405	0.835559	0.942739	0.63231	0.844921	0.84551	0.689094	0.797843	0.392026	0.873166	0.812168	0.808845
0.525862	0.420287	0.893856	0.184627	0.818491	0.160686	0.474568	0.0326376	0.174591	0.0410511	0.832596	0.933649	0.928924	0.0512348	0.693838	0.386174	0.956162	0.929944	0.852884	0.904366	0.878327	0.827518	0.873035	0.809065	0.78742	0.872028	0.663897	0.870271	0.824351	0.182472	0.790814	0.289273	0.849965	0.773717	0.810162	0.901061	0.032785	0.576158	0.862134	0.774137	0.914626	0.613726	0.862489	0.82159	0.732534	0.682564	0.242601	0.839105	0.823141	0.834485
0.491837	0.474067	0.862232	0.25635	0.776592	0.221576	0.399447	0.0647808	0.218024	0.037819	0.821812	0.909875	0.894843	0.122173	0.662858	0.430666	0.965806	0.922305	0.876449	0.893309	0.87114	0.773453	0.886268	0.77787	0.74824	0.841497	0.662042	0.803315	0.840371	0.179162	0.758008	0.297448	0.788172	0.818086	0.821673	0.854162	0.0339929	0.479742	0.838768	0.815491	0.945673	0.546684	0.836117	0.819357	0.63074	0.748677	0.388867	0.743317	0.749863	0.909747
0.459861	0.472956	0.895073	0.19255	0.835929	0.164466	0.497715	0.0395681	0.215466	0.0379675	0.830686	0.922425	0.90009	0.0962847	0.663259	0.598046	0.956682	0.951719	0.901631	0.941009	0.794393	0.783432	0.846082	0.813593	0.822189	0.886138	0.687107	0.898272	0.861519	0.15925	0.7926	0.274418	0.827215	0.828408	0.86826	0.829915	0.0323182	0.608559	0.86819	0.842342	0.949621	0.644663	0.883748	0.797768	0.714301	0.759643	0.361994	0.809196	0.739964	0.821594
0.517134	0.45142	0.909925	0.158806	0.849195	0.166433	0.440993	0.0302395	0.221964	0.0148581	0.864225	0.936601	0.940486	0.055288	0.713967	0.415945	0.980411	0.972978	0.91775	0.95512	0.85952	0.827868	0.887391	0.853479	0.840689	0.887091	0.7228	0.899725	0.893454	0.372132	0.808659	0.259021	0.839922	0.892466	0.825583	0.887921	0.0284609	0.540042	0.875248	0.823111	0.948543	0.651187	0.909306	0.854234	0.756823	0.758756	0.369157	0.862304	0.822338	0.873661
0.497671	0.460923	0.923582	0.157225	0.812252	0.145539	0.428245	0.024392	0.251195	0.0249127	0.756903	0.956359	0.947441	0.0454304	0.674865	0.493913	0.946995	0.943966	0.921103	0.950794	0.905601	0.819444	0.901509	0.896407	0.813821	0.882205	0.707233	0.913857	0.810155	0.23517	0.799632	0.245936	0.800574	0.917274	0.846479	0.910578	0.0314758	0.733971	0.923544	0.857402	0.958048	0.637357	0.845448	0.748338	0.602694	0.818876	0.205902	0.951223	0.886971	0.922055
0.423261	0.417816	0.898774	0.212727	0.823118	0.154475	0.41496	0.038167	0.207618	0.0220674	0.799348	0.9337	0.926666	0.0565537	0.636868	0.568592	0.939166	0.915847	0.908048	0.906149	0.842376	0.812911	0.900679	0.808718	0.75693	0.87876	0.612722	0.880496	0.823827	0.206222	0.814305	0.247806	0.82244	0.816758	0.89199	0.824895	0.0266088	0.624808	0.888094	0.815024	0.933731	0.620757	0.84719	0.860647	0.644153	0.677676	0.236895	0.85393	0.777418	0.893479
0.472468	0.389709	0.876589	0.199478	0.797807	0.148063	0.508093	0.0787912	0.248351	0.0242728	0.777964	0.934892	0.900122	0.075457	0.66353	0.320288	0.971896	0.922895	0.888135	0.920082	0.874219	0.787603	0.9007	0.811175	0.756315	0.834182	0.652864	0.902239	0.852291	0.224043	0.780517	0.228135	0.79212	0.831698	0.868018	0.825336	0.062819	0.518006	0.862799	0.811015	0.948517	0.575428	0.846511	0.796892	0.680369	0.733746	0.39505	0.834853	0.802942	0.839887
0.423367	0.477084	0.87013	0.255822	0.822486	0.170949	0.42901	0.0480398	0.242816	0.0267396	0.805672	0.909181	0.926756	0.105936	0.581087	0.513519	0.932425	0.896174	0.921773	0.910049	0.838689	0.76742	0.893232	0.784922	0.729805	0.837124	0.638002	0.908831	0.818665	0.237943	0.759004	0.265598	0.773568	0.828032	0.859602	0.812847	0.0374106	0.623936	0.870619	0.807998	0.924805	0.565676	0.815988	0.820107	0.624302	0.741529	0.248432	0.774688	0.745873	0.889888
0.560883	0.711983	0.81669	0.208551	0.620548	0.166658	0.247765	0.368574	0.478458	0.112086	0.552633	0.94189	0.766033	0.0654866	0.347688	0.61382	0.646157	0.810015	0.847467	0.90629	0.758726	0.621663	0.882309	0.795791	0.503724	0.805266	0.649265	0.910472	0.839983	0.20887	0.75065	0.263657	0.406564	0.691283	0.858802	0.817583	0.220413	0.399438	0.837713	0.690805	0.937512	0.325942	0.670076	0.70839	0.213981	0.759385	0.382653	0.951681	0.769991	0.868128
0.46102	0.434705	0.918878	0.238666	0.806918	0.147473	0.471349	0.0244328	0.23913	0.0322459	0.858961	0.920704	0.930564	0.0702854	0.725259	0.577662	0.954764	0.936155	0.894304	0.915417	0.864797	0.810777	0.879249	0.850847	0.833225	0.867165	0.643162	0.890634	0.873002	0.322201	0.780813	0.273467	0.79913	0.848169	0.843389	0.882064	0.0273765	0.642685	0.903259	0.858335	0.963244	0.641259	0.886499	0.812992	0.660448	0.730874	0.287213	0.747267	0.806978	0.850319
0.401362	0.401114	0.915361	0.0832344	0.91752	0.0834694	0.425226	0.0184097	0.157363	0.0078727	0.902635	0.952188	0.964555	0.0528934	0.780553	0.62073	0.949085	0.959912	0.83533	0.887596	0.822963	0.873568	0.83118	0.853693	0.854899	0.928241	0.666588	0.932511	0.886259	0.205842	0.815214	0.202203	0.801858	0.694176	0.622953	0.96051	0.016552	0.588327	0.878243	0.913115	0.933307	0.667013	0.905684	0.884769	0.817284	0.820055	0.151182	0.872537	0.788171	0.810224
0.439069	0.380755	0.904638	0.126299	0.83563	0.163201	0.439064	0.0259169	0.205338	0.0166754	0.866778	0.921249	0.934871	0.0736961	0.740886	0.443737	0.943584	0.952221	0.900986	0.931371	0.845956	0.775133	0.911022	0.818525	0.77376	0.88576	0.646136	0.887886	0.848362	0.190381	0.749702	0.215934	0.838668	0.798862	0.808431	0.830788	0.0263581	0.593282	0.883012	0.805149	0.93929	0.66009	0.898618	0.883826	0.728868	0.664135	0.253563	0.777928	0.812449	0.886293
0.451703	0.480364	0.8867	0.175869	0.827953	0.172085	0.472252	0.0369314	0.224264	0.0188018	0.739143	0.895078	0.887885	0.0777878	0.621317	0.393056	0.939503	0.927939	0.867063	0.911917	0.870741	0.781642	0.9012	0.792727	0.734533	0.83117	0.630894	0.861673	0.810637	0.225701	0.757879	0.272916	0.804736	0.847763	0.805148	0.858024	0.015885	0.566565	0.887069	0.799334	0.938313	0.589268	0.845316	0.834813	0.60777	0.643032	0.260873	0.723965	0.763224	0.887713
0.483922	0.517045	0.893499	0.55222	0.812081	0.17349	0.408233	0.0445443	0.227165	0.0412384	0.801071	0.925659	0.914851	0.110434	0.637325	0.417278	0.935937	0.933766	0.891302	0.909599	0.723977	0.771568	0.906889	0.791089	0.722318	0.853268	0.65366	0.885593	0.822636	0.246555	0.796082	0.275054	0.789089	0.834739	0.838631	0.862726	0.0452583	0.639809	0.891329	0.811034	0.938776	0.592974	0.864423	0.867063	0.678595	0.74828	0.506171	0.898221	0.776662	0.833442
0.443763	0.414237	0.896422	0.209513	0.807194	0.152732	0.41636	0.0234379	0.237163	0.0238999	0.828371	0.931911	0.917664	0.106813	0.673968	0.335704	0.945229	0.94096	0.902318	0.92069	0.775409	0.811053	0.878113	0.826228	0.799862	0.845274	0.643676	0.901877	0.861537	0.215038	0.765304	0.259233	0.826803	0.811379	0.84439	0.822322	0.0296928	0.554309	0.850554	0.794372	0.953822	0.691262	0.832809	0.852702	0.685996	0.749892	0.284071	0.861979	0.75841	0.830498
0.463057	0.483221	0.880646	0.322742	0.831076	0.177007	0.490944	0.0249404	0.237348	0.0350812	0.785008	0.928499	0.893879	0.0773927	0.597396	0.5433	0.955033	0.924535	0.890199	0.895477	0.825445	0.752452	0.887844	0.816024	0.732901	0.812521	0.627744	0.889341	0.827734	0.340501	0.797816	0.27114	0.789826	0.870519	0.847658	0.843308	0.037758	0.622568	0.875911	0.833557	0.949831	0.563679	0.840365	0.837948	0.618368	0.689653	0.428853	0.860867	0.787566	0.913381
0.39044	0.324428	0.901469	0.145043	0.862584	0.143216	0.476655	0.0327924	0.207774	0.0168168	0.873526	0.955346	0.951128	0.0540272	0.756548	0.517946	0.95393	0.948885	0.882748	0.912055	0.896293	0.850273	0.915756	0.833047	0.846242	0.882555	0.699088	0.897876	0.894021	0.165029	0.856723	0.234167	0.843529	0.888164	0.885006	0.813416	0.0181394	0.538206	0.897422	0.855734	0.960129	0.718015	0.902536	0.87572	0.712065	0.780045	0.195096	0.841007	0.773816	0.818219
0.46761	0.457191	0.863522	0.263752	0.768379	0.172532	0.389452	0.0659683	0.241706	0.049893	0.70895	0.918596	0.845828	0.117398	0.574465	0.459434	0.91377	0.886641	0.886499	0.921586	0.862035	0.742575	0.875194	0.764794	0.68023	0.749502	0.603293	0.910201	0.773754	0.249262	0.73926	0.224219	0.748201	0.796801	0.81692	0.801634	0.0469306	0.645107	0.912307	0.779487	0.952214	0.555102	0.802414	0.850329	0.596683	0.734386	0.304475	0.850258	0.711896	0.869696
0.610597	0.535036	0.897455	0.332731	0.815008	0.266383	0.529548	0.0423187	0.233818	0.0220905	0.762352	0.933937	0.905975	0.0988715	0.615654	0.545045	0.926715	0.919143	0.861378	0.921966	0.777454	0.783745	0.888111	0.794356	0.735443	0.861981	0.654575	0.888282	0.839472	0.286931	0.789865	0.26007	0.817273	0.900923	0.866556	0.878696	0.0353317	0.549328	0.868766	0.776826	0.951709	0.616161	0.830484	0.828243	0.599984	0.761571	0.438868	0.847883	0.70145	0.890763
0.453694	0.538909	0.894591	0.147182	0.829039	0.138619	0.377013	0.0335712	0.240045	0.0202713	0.833879	0.904096	0.930933	0.0893145	0.666836	0.390015	0.951553	0.950291	0.88387	0.885861	0.884771	0.829925	0.912986	0.825397	0.804095	0.856707	0.631225	0.897034	0.859498	0.224937	0.806869	0.249453	0.783655	0.767432	0.912753	0.854121	0.0322892	0.708901	0.924411	0.801835	0.944575	0.687844	0.890818	0.816889	0.639984	0.783622	0.269316	0.862939	0.79285	0.896351
0.340867	0.440629	0.919709	0.0781277	0.885857	0.143582	0.396279	0.0253084	0.192786	0.0238172	0.877038	0.946963	0.958985	0.107665	0.73391	0.493915	0.955639	0.962388	0.886184	0.868736	0.906114	0.834649	0.86524	0.859803	0.8622	0.903692	0.724232	0.932616	0.902158	0.277212	0.82677	0.24113	0.899046	0.793243	0.825536	0.885098	0.0434645	0.766041	0.878279	0.847543	0.960256	0.757822	0.904299	0.807845	0.75005	0.796222	0.114976	0.81196	0.798673	0.854749
0.431887	0.479706	0.881081	0.275038	0.799218	0.213192	0.423802	0.0547213	0.243775	0.0346258	0.73481	0.94492	0.891344	0.0940677	0.619707	0.4749	0.936772	0.884155	0.903382	0.903347	0.823596	0.737267	0.870589	0.78879	0.718838	0.816649	0.655876	0.90431	0.774175	0.367035	0.796681	0.220835	0.740403	0.736117	0.874053	0.876965	0.0324631	0.532227	0.930604	0.825965	0.938887	0.514838	0.819014	0.863286	0.5636	0.742615	0.300675	0.784704	0.771858	0.827885
0.408818	0.475205	0.891616	0.200179	0.806813	0.212519	0.397235	0.0790311	0.23655	0.0807193	0.776416	0.919392	0.886785	0.112147	0.561899	0.406827	0.95751	0.922522	0.876508	0.935097	0.776096	0.743457	0.886735	0.806117	0.762695	0.816694	0.688621	0.867991	0.820913	0.31232	0.783897	0.247426	0.757876	0.782717	0.765331	0.83739	0.0635359	0.571253	0.890271	0.775938	0.937069	0.632157	0.846729	0.817024	0.651264	0.75804	0.318308	0.757327	0.756602	0.915247
0.435861	0.392314	0.893079	0.142841	0.820808	0.148978	0.466792	0.0274908	0.211195	0.0161362	0.848185	0.927553	0.934705	0.0876757	0.699079	0.515949	0.932004	0.949938	0.882504	0.931042	0.84153	0.830939	0.902771	0.832286	0.810386	0.871403	0.654211	0.880022	0.855379	0.25895	0.771397	0.27725	0.795102	0.850967	0.941505	0.81668	0.0257298	0.517525	0.895356	0.818943	0.94283	0.650411	0.861918	0.860174	0.653096	0.758995	0.256083	0.820344	0.759953	0.893021
0.513228	0.316916	0.89678	0.340766	0.803536	0.153324	0.396508	0.0289339	0.243062	0.0514004	0.793764	0.924414	0.922603	0.113686	0.630352	0.519213	0.936335	0.921865	0.883132	0.917858	0.855533	0.770086	0.925084	0.808628	0.761092	0.829743	0.635222	0.902024	0.853464	0.112173	0.769588	0.25622	0.808386	0.854632	0.844728	0.829375	0.0242249	0.74969	0.912678	0.813211	0.961891	0.661061	0.832389	0.856794	0.610173	0.771614	0.22346	0.754049	0.760328	0.86628
0.418664	0.504219	0.922312	0.215215	0.832928	0.149908	0.499789	0.0336684	0.235699	0.0188521	0.793482	0.950593	0.931795	0.0617238	0.585105	0.466244	0.949255	0.94566	0.84789	0.882401	0.868209	0.822991	0.789943	0.837053	0.811852	0.87635	0.67976	0.918156	0.823237	0.316348	0.820925	0.234441	0.773624	0.799212	0.766852	0.899886	0.0290962	0.642544	0.9106	0.879234	0.958769	0.498554	0.897296	0.928671	0.614512	0.81858	0.351654	0.888682	0.824082	0.850076
0.451878	0.443715	0.885978	0.220541	0.813731	0.200921	0.373836	0.0304707	0.220327	0.0201626	0.76992	0.934444	0.897312	0.156888	0.665991	0.492631	0.942632	0.905145	0.882012	0.916345	0.881656	0.748383	0.852637	0.81133	0.72751	0.835822	0.632163	0.868733	0.811452	0.244686	0.762326	0.22505	0.792897	0.749604	0.865132	0.781354	0.0605256	0.569875	0.882185	0.78502	0.925706	0.536899	0.835868	0.845255	0.594954	0.620934	0.34808	0.703378	0.770996	0.905301
0.453087	0.449508	0.895003	0.304347	0.821907	0.190216	0.518314	0.0409044	0.242568	0.0247039	0.725901	0.925459	0.900876	0.109721	0.594931	0.527847	0.953697	0.911932	0.878917	0.925627	0.772771	0.761932	0.909012	0.795679	0.696582	0.865168	0.641646	0.869606	0.810662	0.133286	0.757193	0.254194	0.787673	0.825762	0.780373	0.784545	0.0562829	0.586861	0.933999	0.802578	0.937632	0.558981	0.812413	0.826608	0.585652	0.745858	0.202597	0.835131	0.776819	0.860436
0.495929	0.442484	0.896535	0.305833	0.82293	0.181559	0.427488	0.0415978	0.231242	0.0311634	0.75772	0.923057	0.893451	0.117385	0.67556	0.465666	0.938996	0.936558	0.869	0.929224	0.888236	0.758764	0.916487	0.781515	0.710845	0.878838	0.656081	0.89511	0.841799	0.31492	0.777953	0.222535	0.732158	0.866989	0.874285	0.862831	0.0479498	0.709712	0.902193	0.803754	0.939724	0.586078	0.826341	0.827885	0.627326	0.767161	0.379812	0.892983	0.801439	0.915377
0.537316	0.396747	0.951315	0.243274	0.893093	0.159985	0.42239	0.0225413	0.186104	0.0140235	0.848192	0.0298242	0.928875	0.0494833	0.727205	0.512748	0.952062	0.976345	0.925047	0.892874	0.906786	0.885925	0.880958	0.852213	0.800168	0.921399	0.762571	0.932406	0.935597	0.256624	0.835178	0.223181	0.871911	0.738729	0.654989	0.901943	0.0287841	0.737156	0.898408	0.866008	0.948318	0.726323	0.901378	0.728312	0.817036	0.795192	0.323552	0.873241	0.80703	0.869362
0.429313	0.409401	0.882033	0.250515	0.835442	0.166047	0.39489	0.0151628	0.200645	0.0250992	0.819207	0.922905	0.92399	0.0508286	0.627934	0.462312	0.950765	0.937504	0.868985	0.890122	0.832216	0.784613	0.864598	0.816656	0.765701	0.882246	0.641271	0.867289	0.822056	0.230799	0.743138	0.257936	0.768993	0.83596	0.852093	0.836938	0.0303355	0.638839	0.879233	0.825469	0.936555	0.55114	0.871203	0.833913	0.7148	0.688806	0.314416	0.804822	0.754395	0.902917
0.477366	0.533942	0.885267	0.303885	0.806064	0.180023	0.443705	0.0180011	0.209255	0.0289511	0.807963	0.922983	0.906916	0.0812465	0.675267	0.566889	0.960012	0.928812	0.900418	0.924459	0.868484	0.775573	0.873053	0.80179	0.771553	0.834753	0.642227	0.881649	0.86064	0.160087	0.815939	0.256037	0.81182	0.803403	0.855984	0.862621	0.0453216	0.645782	0.908144	0.807306	0.953953	0.565623	0.886164	0.866086	0.678097	0.767586	0.297057	0.804139	0.787851	0.862954
0.433888	0.498076	0.871667	0.232027	0.805424	0.133465	0.389658	0.0362939	0.224204	0.0151924	0.78232	0.93269	0.913053	0.0843953	0.688144	0.517471	0.952149	0.920295	0.904271	0.925288	0.77844	0.788071	0.909811	0.806314	0.75739	0.864978	0.635182	0.884692	0.813968	0.342261	0.779548	0.25705	0.81322	0.818981	0.890878	0.857316	0.0349688	0.552594	0.926983	0.782555	0.93233	0.629217	0.857681	0.849853	0.702701	0.777693	0.369081	0.903999	0.784389	0.834528
0.431126	0.520152	0.889745	0.251439	0.83586	0.15702	0.394052	0.0224347	0.206287	0.0196114	0.857801	0.926018	0.935216	0.0737057	0.664983	0.495647	0.951282	0.934222	0.91146	0.918423	0.867747	0.806553	0.829558	0.830348	0.775823	0.870253	0.68628	0.882493	0.875831	0.209183	0.787424	0.209042	0.849142	0.79756	0.835177	0.843898	0.0221006	0.668693	0.887692	0.804278	0.933476	0.662272	0.897991	0.759602	0.757243	0.74891	0.286656	0.796249	0.764197	0.900268
0.470701	0.386716	0.89672	0.11251	0.849615	0.16707	0.341421	0.0296322	0.205709	0.0205349	0.804142	0.924312	0.927806	0.0422784	0.69416	0.507809	0.954457	0.955102	0.942771	0.941323	0.905547	0.832676	0.926187	0.82324	0.800144	0.861964	0.66464	0.906799	0.846958	0.401229	0.775544	0.266078	0.83595	0.82826	0.855482	0.854312	0.0267327	0.610576	0.890382	0.790845	0.943577	0.659666	0.888781	0.782896	0.721544	0.780581	0.165687	0.580216	0.784546	0.913132
0.434431	0.585265	0.904586	0.124825	0.842495	0.114695	0.437072	0.0186294	0.233944	0.0225476	0.871252	0.952182	0.937842	0.0452406	0.591247	0.424458	0.939168	0.944944	0.866301	0.928469	0.911332	0.86297	0.90432	0.863737	0.827499	0.932308	0.70788	0.931741	0.875	0.235152	0.805548	0.239715	0.868905	0.776101	0.751918	0.867439	0.0117352	0.721528	0.873975	0.847313	0.954646	0.658999	0.895412	0.864056	0.759965	0.747824	0.394417	0.860568	0.818752	0.91746
0.482752	0.399442	0.91642	0.261689	0.843925	0.176294	0.395129	0.0198346	0.200202	0.0131076	0.857451	0.932369	0.918609	0.0725977	0.698491	0.610764	0.95821	0.955057	0.89435	0.923825	0.89214	0.778131	0.9103	0.831678	0.767491	0.879279	0.656598	0.854592	0.857044	0.197596	0.773987	0.258275	0.848096	0.898891	0.811775	0.853319	0.035371	0.625973	0.876367	0.801909	0.961994	0.697794	0.875334	0.884393	0.680755	0.723118	0.280604	0.815144	0.796929	0.912048
0.466506	0.391506	0.836777	0.325083	0.81351	0.191364	0.407139	0.0404569	0.229227	0.0246385	0.776629	0.916684	0.897935	0.10817	0.57681	0.52621	0.943772	0.896264	0.907415	0.921908	0.822929	0.783021	0.830989	0.798881	0.720403	0.842825	0.654923	0.865424	0.789945	0.13761	0.782761	0.271232	0.742771	0.827998	0.814446	0.806705	0.035395	0.57767	0.894284	0.788316	0.935545	0.584031	0.809799	0.849457	0.640781	0.718204	0.342549	0.721354	0.716899	0.881999
0.494498	0.473092	0.878434	0.207422	0.771589	0.196888	0.364213	0.054672	0.230026	0.0474021	0.778966	0.936229	0.884127	0.0760868	0.636439	0.550552	0.940719	0.899564	0.861808	0.895769	0.867499	0.748047	0.886551	0.75892	0.773836	0.825337	0.650115	0.88074	0.839568	0.245491	0.772144	0.242985	0.744418	0.812547	0.906321	0.811329	0.0385023	0.603575	0.838036	0.789779	0.951989	0.601855	0.819912	0.809827	0.637389	0.752286	0.388303	0.836117	0.66727	0.959427
0.3771	0.448897	0.875907	0.267254	0.824854	0.159012	0.460739	0.0275931	0.241546	0.0774985	0.752817	0.933252	0.907345	0.113657	0.570161	0.600297	0.889557	0.906107	0.82924	0.910565	0.78982	0.761493	0.821788	0.809585	0.698655	0.843619	0.650563	0.877135	0.811567	0.200987	0.782534	0.241663	0.784728	0.82953	0.810193	0.860621	0.0252907	0.625543	0.892353	0.751448	0.936604	0.565073	0.827063	0.836438	0.63634	0.675905	0.36614	0.71685	0.645746	0.835508
0.528499	0.41231	0.905404	0.213577	0.844585	0.192277	0.487629	0.0216224	0.234163	0.0210625	0.873545	0.922354	0.938282	0.0879593	0.632841	0.563356	0.93743	0.951652	0.923284	0.906959	0.798352	0.815842	0.871244	0.835244	0.803916	0.854934	0.657154	0.893111	0.881885	0.252641	0.819691	0.275704	0.825561	0.695094	0.866347	0.850188	0.0213356	0.592868	0.873584	0.869569	0.950424	0.689943	0.877347	0.88401	0.75763	0.758482	0.333285	0.787442	0.716742	0.876058
0.426584	0.471297	0.924848	0.210171	0.808675	0.124531	0.377466	0.0229817	0.153168	0.0207559	0.874218	0.93729	0.948994	0.0683259	0.62768	0.682708	0.934172	0.94704	0.881178	0.937466	0.811091	0.799015	0.821265	0.836736	0.785552	0.901017	0.760474	0.925415	0.883291	0.14513	0.893736	0.22417	0.761478	0.646667	0.761332	0.869983	0.0218584	0.583673	0.830628	0.866254	0.960203	0.732708	0.888834	0.839746	0.661751	0.799108	0.324402	0.893635	0.758116	0.82402
0.425599	0.402305	0.904134	0.170123	0.783977	0.15553	0.39945	0.0289423	0.212374	0.0135021	0.802792	0.932367	0.917376	0.102386	0.585181	0.371306	0.935318	0.935461	0.926734	0.908102	0.858079	0.809797	0.946891	0.831894	0.759611	0.837369	0.646379	0.879431	0.842113	0.195225	0.768412	0.282706	0.812118	0.735064	0.825485	0.87667	0.0174423	0.580473	0.913933	0.81833	0.91678	0.652365	0.83715	0.806467	0.662434	0.751371	0.28412	0.743347	0.706166	0.836163
0.471215	0.389428	0.873667	0.296589	0.808551	0.172476	0.415132	0.0321623	0.220635	0.0371282	0.80843	0.905172	0.898241	0.107113	0.62676	0.501573	0.934462	0.93079	0.890221	0.872188	0.82894	0.784326	0.886537	0.818528	0.776603	0.871601	0.629456	0.851178	0.794697	0.269198	0.759552	0.264283	0.813423	0.830202	0.867717	0.859193	0.0442764	0.63885	0.855556	0.793976	0.952477	0.593654	0.85884	0.776378	0.643015	0.68276	0.343665	0.744027	0.708053	0.90693
0.509443	0.438401	0.865884	0.167038	0.802476	0.18414	0.457249	0.0287116	0.215538	0.0171041	0.757564	0.906816	0.915783	0.0946321	0.624048	0.517907	0.944463	0.931341	0.921553	0.931601	0.868703	0.786971	0.89284	0.796964	0.786282	0.82079	0.651502	0.867461	0.839637	0.164636	0.762502	0.265328	0.769848	0.856374	0.903432	0.905851	0.0336729	0.606213	0.872958	0.773415	0.943518	0.601035	0.824643	0.733215	0.706967	0.704371	0.416014	0.837079	0.721582	0.777775
0.424421	0.481218	0.872318	0.341901	0.794244	0.140801	0.479037	0.0245121	0.246017	0.0350791	0.794451	0.921565	0.930432	0.159745	0.634831	0.505305	0.944355	0.931243	0.889869	0.901255	0.808517	0.789195	0.898712	0.81386	0.768675	0.855026	0.671689	0.877657	0.831039	0.190331	0.826317	0.235343	0.816101	0.786717	0.848469	0.884991	0.0493462	0.671764	0.854991	0.78364	0.947494	0.556747	0.835338	0.815653	0.650146	0.67919	0.488947	0.832199	0.753869	0.935006
0.492048	0.470204	0.911007	0.214065	0.87119	0.0760199	0.414197	0.0369793	0.182837	0.0153717	0.892182	0.941905	0.934065	0.0469222	0.730328	0.470565	0.96073	0.955696	0.909235	0.914951	0.892897	0.834961	0.818787	0.854932	0.783914	0.909244	0.702554	0.904853	0.88282	0.224381	0.81573	0.283157	0.826075	0.709756	0.767996	0.967245	0.0197951	0.665749	0.907596	0.8856	0.951738	0.652312	0.894793	0.743881	0.704835	0.756836	0.381011	0.851584	0.74588	0.849076
0.449744	0.383524	0.869896	0.166461	0.790163	0.156517	0.383869	0.029742	0.194548	0.0152071	0.806482	0.899832	0.937736	0.0495553	0.663526	0.545959	0.933279	0.952397	0.904469	0.900003	0.779691	0.723607	0.940311	0.790179	0.748664	0.848563	0.655717	0.872657	0.834058	0.140118	0.788491	0.216896	0.79098	0.779137	0.711871	0.852024	0.0263657	0.578023	0.881689	0.784994	0.938422	0.521086	0.867549	0.690616	0.644491	0.72869	0.313108	0.751377	0.741669	0.890695
0.475305	0.439592	0.875376	0.322823	0.838466	0.206018	0.361534	0.160754	0.235177	0.0810052	0.763669	0.911756	0.850015	0.154514	0.501462	0.479079	0.926328	0.852875	0.884318	0.904308	0.807419	0.704022	0.808053	0.743609	0.687618	0.733597	0.61976	0.859131	0.796378	0.318045	0.742947	0.164022	0.685129	0.598903	0.835072	0.861434	0.0939131	0.579789	0.866279	0.771552	0.900501	0.530347	0.77836	0.849079	0.553733	0.705365	0.291265	0.735616	0.705069	0.759667
0.523001	0.439687	0.870262	0.290323	0.850304	0.166666	0.434839	0.0218042	0.22468	0.0261483	0.807478	0.925098	0.889299	0.0549089	0.596393	0.447417	0.948396	0.925206	0.845202	0.913943	0.814403	0.766908	0.898241	0.773317	0.770771	0.846688	0.598188	0.871439	0.828424	0.263225	0.829686	0.217731	0.795141	0.750246	0.90528	0.847516	0.0490551	0.548527	0.846743	0.81006	0.922499	0.562834	0.842175	0.748673	0.692768	0.761233	0.400643	0.85002	0.733111	0.812937
0.53942	0.476999	0.897602	0.182716	0.836126	0.233878	0.521085	0.0245292	0.220754	0.0332004	0.789777	0.92567	0.93764	0.0925614	0.666672	0.507033	0.951388	0.942522	0.89405	0.92795	0.880311	0.82037	0.860288	0.816252	0.806292	0.881335	0.690204	0.896052	0.856953	0.289521	0.785266	0.271171	0.82558	0.8619	0.903305	0.863717	0.0262786	0.631732	0.867409	0.789787	0.931398	0.651549	0.878509	0.785591	0.765291	0.794138	0.328595	0.872057	0.81013	0.927041
0.505948	0.525895	0.902751	0.24165	0.902404	0.115523	0.42027	0.0255751	0.185702	0.032392	0.851926	0.939315	0.937884	0.0752588	0.701913	0.400877	0.963829	0.954754	0.869882	0.893051	0.897008	0.829185	0.893863	0.85856	0.796388	0.936273	0.684561	0.915419	0.881573	0.127793	0.84729	0.211231	0.829642	0.787382	0.823776	0.885846	0.0411426	0.553644	0.870276	0.874076	0.94426	0.651858	0.902672	0.896857	0.669185	0.706027	0.320321	0.85296	0.784063	0.850617
0.532252	0.47781	0.867974	0.31692	0.833882	0.161777	0.415291	0.0451439	0.211953	0.0287729	0.770238	0.893414	0.912107	0.132179	0.635659	0.433055	0.9262	0.908122	0.863791	0.924795	0.875113	0.756436	0.946624	0.809362	0.713705	0.819556	0.632443	0.881345	0.837417	0.289745	0.803918	0.234796	0.812175	0.762095	0.890412	0.856773	0.0465893	0.58192	0.875255	0.788966	0.954814	0.63851	0.82739	0.868397	0.656263	0.717824	0.360612	0.90032	0.739654	0.900492
0.416037	0.398706	0.910431	0.295895	0.813453	0.165641	0.383517	0.0448069	0.204249	0.0140005	0.805045	0.937822	0.923843	0.0706902	0.597825	0.3843	0.946585	0.947565	0.896898	0.878187	0.820775	0.801921	0.896808	0.808495	0.78047	0.864232	0.656964	0.890847	0.876551	0.123857	0.79097	0.233919	0.818152	0.807957	0.871001	0.855727	0.0491157	0.621655	0.834603	0.813323	0.942754	0.637792	0.860778	0.823337	0.697488	0.803141	0.211235	0.749346	0.735398	0.882283
0.462343	0.463678	0.89747	0.131663	0.837494	0.144756	0.458701	0.0245512	0.23775	0.0197256	0.813672	0.916435	0.922317	0.0782716	0.688444	0.456351	0.941212	0.957217	0.892035	0.917295	0.851422	0.803525	0.895478	0.813656	0.770139	0.88389	0.687451	0.90517	0.853866	0.175171	0.776632	0.264868	0.823827	0.870511	0.856364	0.842356	0.0575929	0.625733	0.893448	0.85214	0.952187	0.615561	0.866601	0.864783	0.718007	0.689255	0.233786	0.795508	0.76873	0.892054
0.478124	0.435776	0.9133	0.281095	0.75789	0.188937	0.343946	0.100595	0.230605	0.0795961	0.783567	0.907918	0.910523	0.0780802	0.692924	0.528784	0.923913	0.851134	0.853119	0.878547	0.826805	0.778437	0.863995	0.785697	0.708234	0.843277	0.657185	0.830155	0.808839	0.42748	0.716982	0.261716	0.729889	0.781967	0.818373	0.794095	0.0425109	0.542031	0.883102	0.774218	0.93566	0.606267	0.813501	0.828602	0.605917	0.740302	0.372307	0.841026	0.779533	0.842799
0.517043	0.409606	0.87972	0.150135	0.792875	0.18184	0.447081	0.0578807	0.215575	0.0380493	0.804302	0.920382	0.908526	0.110559	0.59224	0.40454	0.931117	0.922498	0.878426	0.895889	0.83758	0.740364	0.835679	0.790364	0.732339	0.848742	0.631656	0.828266	0.837624	0.199011	0.748789	0.243756	0.798264	0.806495	0.81388	0.739221	0.0384729	0.550998	0.885887	0.805278	0.947536	0.656296	0.834851	0.820955	0.601623	0.74883	0.251999	0.87944	0.693875	0.824935
0.506398	0.476413	0.885508	0.259322	0.823083	0.185621	0.432697	0.0435495	0.231031	0.0338428	0.796269	0.923098	0.899691	0.098952	0.615785	0.520463	0.918279	0.915594	0.917097	0.899382	0.800288	0.778	0.823533	0.795579	0.756798	0.829084	0.619597	0.879033	0.8287	0.19803	0.776939	0.267041	0.824392	0.761145	0.808433	0.769899	0.0460118	0.549949	0.852329	0.788565	0.925419	0.628556	0.844437	0.848162	0.679882	0.750764	0.261246	0.887843	0.728475	0.750265
0.500377	0.51729	0.882239	0.27856	0.779012	0.231735	0.368165	0.0751618	0.263467	0.108471	0.749449	0.909706	0.877266	0.111154	0.595509	0.599649	0.944013	0.905165	0.865524	0.898881	0.80525	0.746543	0.839889	0.794712	0.718624	0.853989	0.66872	0.86881	0.805612	0.299896	0.741323	0.259644	0.75448	0.764328	0.808248	0.806302	0.0508352	0.526868	0.821316	0.7901	0.941987	0.573686	0.797831	0.753818	0.628676	0.698072	0.292682	0.760377	0.741283	0.85347
0.53078	0.620756	0.879053	0.206055	0.781904	0.207595	0.424171	0.0637133	0.225357	0.0680814	0.724826	0.907051	0.873939	0.113103	0.627148	0.48942	0.864586	0.911593	0.864598	0.860964	0.844996	0.750812	0.879436	0.771341	0.676803	0.706329	0.647607	0.849777	0.812494	0.505424	0.737633	0.195635	0.788863	0.752905	0.798413	0.829604	0.0717329	0.625134	0.889318	0.780872	0.940087	0.516893	0.808421	0.77828	0.58265	0.7466	0.261855	0.884711	0.742808	0.761879
0.456464	0.413146	0.895166	0.241407	0.865973	0.183608	0.439539	0.0214366	0.213557	0.0231149	0.847294	0.899396	0.918196	0.0976584	0.696328	0.420254	0.952069	0.941256	0.872862	0.891183	0.830079	0.78363	0.801557	0.818394	0.736109	0.859755	0.641105	0.839537	0.841513	0.238215	0.749078	0.242561	0.838597	0.789276	0.77861	0.84495	0.0361396	0.533321	0.86726	0.839779	0.92069	0.539597	0.856178	0.796615	0.697695	0.669539	0.351426	0.765289	0.709903	0.84115
0.457	0.438217	0.884275	0.243001	0.817785	0.1631	0.398733	0.0459408	0.23267	0.0401361	0.818361	0.91688	0.890257	0.142317	0.628509	0.612292	0.92795	0.932121	0.881212	0.86851	0.787134	0.722377	0.88111	0.776688	0.732947	0.854007	0.632991	0.847729	0.813677	0.152675	0.730987	0.225903	0.774888	0.759683	0.83734	0.760537	0.0578278	0.665468	0.851053	0.817343	0.950505	0.666983	0.830937	0.810619	0.691403	0.769293	0.393104	0.770902	0.749367	0.820812
0.4492	0.357995	0.880616	0.210401	0.805677	0.15345	0.517737	0.031898	0.247553	0.0286431	0.84662	0.907015	0.947018	0.0961365	0.679788	0.451062	0.943531	0.940477	0.921697	0.899426	0.836577	0.808226	0.859685	0.827831	0.786752	0.867212	0.671087	0.862964	0.849375	0.313794	0.739897	0.258692	0.807084	0.747662	0.793355	0.771812	0.0508779	0.498845	0.900702	0.840549	0.928785	0.639261	0.856431	0.852737	0.70035	0.713911	0.302785	0.871649	0.786334	0.858388
0.437753	0.490637	0.91571	0.132007	0.829228	0.184651	0.337095	0.0290189	0.209305	0.0254792	0.836957	0.949286	0.920336	0.0647166	0.652604	0.537353	0.956657	0.940615	0.88956	0.918031	0.909637	0.789562	0.871436	0.844174	0.816502	0.91417	0.671938	0.898414	0.879264	0.127414	0.770421	0.178282	0.83262	0.858287	0.813809	0.877498	0.0226648	0.661554	0.88829	0.839095	0.940707	0.600635	0.874203	0.912386	0.707681	0.73517	0.37978	0.820213	0.779599	0.83106
0.494798	0.494627	0.904926	0.218671	0.831331	0.190702	0.408992	0.0385712	0.260379	0.0375059	0.827381	0.912488	0.929973	0.120587	0.688545	0.353509	0.953461	0.945438	0.876752	0.902928	0.849282	0.804605	0.882956	0.786296	0.804298	0.877213	0.712218	0.900589	0.8763	0.366471	0.780823	0.28334	0.799743	0.829528	0.756798	0.821	0.0563266	0.661493	0.884426	0.829829	0.944243	0.691858	0.883969	0.861256	0.640729	0.738041	0.339241	0.813027	0.809687	0.765815
0.52223	0.523011	0.827283	0.378034	0.771297	0.213035	0.438422	0.105876	0.320191	0.15598	0.693476	0.925883	0.847981	0.160514	0.568636	0.54775	0.940047	0.86594	0.817048	0.948264	0.846616	0.681277	0.907272	0.747057	0.720557	0.785642	0.729691	0.889101	0.782634	0.333703	0.771025	0.306007	0.712128	0.913846	0.802575	0.868924	0.0670732	0.60387	0.909522	0.804049	0.930733	0.592695	0.816815	0.68129	0.538055	0.689076	0.257044	0.882423	0.773861	0.868495
0.496913	0.626541	0.879906	0.283607	0.818198	0.219871	0.323001	0.0617107	0.273255	0.0539592	0.807584	0.913515	0.915493	0.110307	0.663474	0.451495	0.94339	0.927769	0.890499	0.91863	0.9064	0.743629	0.900468	0.807529	0.774814	0.852342	0.675019	0.894963	0.835691	0.182927	0.790551	0.318531	0.826858	0.887718	0.875435	0.86671	0.0491598	0.660651	0.876792	0.810071	0.940241	0.652151	0.870311	0.769126	0.670041	0.746295	0.244253	0.8016	0.811113	0.893521
0.483198	0.58153	0.896506	0.279554	0.802901	0.193767	0.427414	0.0423183	0.281891	0.0227821	0.815251	0.925086	0.925347	0.0827793	0.696476	0.552912	0.938457	0.950349	0.851922	0.918987	0.88547	0.773669	0.902282	0.812164	0.816873	0.848177	0.68383	0.898518	0.842267	0.260562	0.785584	0.316782	0.785763	0.889045	0.820812	0.859913	0.0444398	0.609656	0.87536	0.813165	0.94896	0.652043	0.877582	0.784586	0.667717	0.748773	0.360241	0.838904	0.79429	0.854397
0.435959	0.473184	0.886561	0.207424	0.780232	0.155357	0.45459	0.0493286	0.300203	0.0439807	0.777183	0.916798	0.894404	0.133527	0.613336	0.418306	0.939073	0.892834	0.792391	0.865568	0.79669	0.753267	0.865924	0.758439	0.782012	0.807657	0.649435	0.890195	0.816575	0.278768	0.79142	0.322905	0.771401	0.769474	0.706533	0.879349	0.0585162	0.610416	0.841016	0.789403	0.934003	0.629561	0.855143	0.83278	0.623986	0.742584	0.338994	0.831549	0.763936	0.858745
0.492821	0.517868	0.887181	0.229071	0.794227	0.221708	0.390959	0.0472665	0.278299	0.0740592	0.775498	0.951046	0.891716	0.120496	0.652448	0.346334	0.96542	0.910898	0.873301	0.936945	0.894494	0.716997	0.936714	0.797262	0.799962	0.844606	0.693612	0.908795	0.829884	0.113787	0.831245	0.301759	0.849135	0.918864	0.791698	0.855116	0.0452672	0.597212	0.902286	0.815592	0.952199	0.674471	0.840675	0.808029	0.689462	0.604523	0.350228	0.837504	0.802669	0.846713
0.433721	0.465688	0.901695	0.349977	0.798442	0.170795	0.516633	0.0365563	0.268353	0.0275445	0.846895	0.931816	0.929608	0.10967	0.610008	0.617236	0.928859	0.953655	0.870481	0.935279	0.916272	0.751249	0.896648	0.83335	0.830844	0.866734	0.685617	0.887513	0.84858	0.403025	0.769871	0.297689	0.812469	0.835325	0.82031	0.864453	0.0388585	0.672026	0.871412	0.842641	0.950867	0.679702	0.843262	0.850678	0.685827	0.766693	0.337841	0.830538	0.766754	0.865905
0.480051	0.415786	0.870857	0.319879	0.80767	0.163067	0.39906	0.0716235	0.275951	0.0181209	0.843565	0.912925	0.897079	0.119907	0.676945	0.593566	0.934045	0.929196	0.84251	0.912946	0.886574	0.743601	0.911883	0.823693	0.791951	0.852762	0.684515	0.89826	0.85028	0.213248	0.782631	0.323706	0.837603	0.813053	0.813486	0.87349	0.0413631	0.644207	0.790963	0.783164	0.933731	0.656797	0.876804	0.751788	0.725219	0.628636	0.422876	0.829906	0.77348	0.875644
0.440915	0.563731	0.905306	0.220404	0.853007	0.128188	0.397215	0.0450362	0.246935	0.0267595	0.874809	0.934937	0.930542	0.10117	0.644087	0.563663	0.938496	0.955792	0.811668	0.899608	0.931426	0.813831	0.774986	0.836057	0.824797	0.891293	0.755692	0.896837	0.876696	0.196086	0.821931	0.298093	0.828879	0.742162	0.819133	0.887799	0.0360512	0.560804	0.780305	0.863182	0.948947	0.764693	0.881324	0.888989	0.705923	0.721767	0.337116	0.811577	0.817105	0.737963
0.456606	0.5134	0.880457	0.328368	0.784197	0.203273	0.341159	0.0695443	0.271078	0.0307772	0.764671	0.929891	0.88366	0.160453	0.6064	0.556911	0.92424	0.9303	0.858541	0.931447	0.880624	0.709458	0.90305	0.792135	0.766511	0.850418	0.690716	0.887104	0.798359	0.255662	0.794003	0.296991	0.799579	0.788416	0.852899	0.883518	0.0591216	0.559646	0.88288	0.825317	0.955608	0.707646	0.820483	0.857271	0.626477	0.752239	0.392181	0.769102	0.775167	0.859213
0.497663	0.543829	0.871468	0.314792	0.786395	0.172621	0.442577	0.0935319	0.309841	0.083365	0.714193	0.933821	0.894685	0.184172	0.544808	0.620862	0.931067	0.928194	0.868965	0.923015	0.836957	0.779916	0.911808	0.74793	0.669124	0.838105	0.656181	0.914205	0.822689	0.284658	0.782309	0.353538	0.719823	0.917956	0.840293	0.833396	0.0837497	0.703025	0.847053	0.809805	0.957872	0.518578	0.813872	0.790644	0.601324	0.719167	0.418207	0.855816	0.738255	0.863047
0.480852	0.459178	0.882642	0.349318	0.820604	0.185557	0.406698	0.0824128	0.284608	0.0533527	0.780436	0.93099	0.889519	0.139619	0.528071	0.517011	0.921641	0.924462	0.855444	0.890383	0.894477	0.770219	0.874924	0.79794	0.749256	0.836638	0.694517	0.890809	0.825349	0.270607	0.782934	0.338089	0.760188	0.84646	0.836787	0.855081	0.0689865	0.651263	0.864841	0.804079	0.956222	0.624032	0.83947	0.839688	0.623793	0.772577	0.297782	0.854217	0.748568	0.858672
0.522543	0.54546	0.885771	0.308002	0.823167	0.150678	0.483078	0.0392718	0.245646	0.0429563	0.802022	0.914673	0.91593	0.104943	0.626555	0.560837	0.928336	0.920882	0.766466	0.852933	0.889701	0.774756	0.811434	0.806127	0.808571	0.829629	0.61722	0.884998	0.823427	0.23266	0.783259	0.271903	0.786952	0.80313	0.769306	0.845302	0.0367575	0.512987	0.832374	0.844984	0.917113	0.710004	0.846458	0.882589	0.707801	0.734476	0.345746	0.817255	0.792867	0.890327
0.493172	0.380616	0.882376	0.263948	0.788072	0.156318	0.442902	0.0422877	0.268822	0.0346331	0.799291	0.89737	0.911353	0.107841	0.610854	0.322639	0.938985	0.930803	0.823801	0.921164	0.866302	0.803239	0.868857	0.794007	0.775093	0.889991	0.687672	0.88029	0.867813	0.256384	0.76042	0.252798	0.781874	0.590965	0.783468	0.828984	0.0484552	0.617145	0.820149	0.82166	0.934361	0.657781	0.884438	0.871872	0.758403	0.80344	0.391258	0.836472	0.767331	0.786887
0.474919	0.341881	0.858698	0.440549	0.837411	0.113177	0.403243	0.119989	0.266885	0.0429741	0.760383	0.399578	0.869452	0.107389	0.572149	0.527644	0.935247	0.906949	0.8319	0.875504	0.900053	0.769421	0.817644	0.798637	0.719311	0.807389	0.685889	0.90983	0.786117	0.226592	0.788183	0.214282	0.727417	0.702794	0.802577	0.873678	0.136453	0.543087	0.824006	0.848474	0.921936	0.693247	0.83751	0.827195	0.678582	0.734807	0.50398	0.912026	0.756047	0.85291
0.458409	0.477195	0.870069	0.231734	0.810102	0.133823	0.429982	0.06621	0.260931	0.0405959	0.839578	0.934249	0.925103	0.0946748	0.690288	0.503026	0.941638	0.933958	0.803322	0.897602	0.902291	0.786056	0.833891	0.789904	0.797658	0.849576	0.689739	0.908159	0.851414	0.36474	0.770959	0.277911	0.811125	0.813229	0.73137	0.837927	0.0435368	0.644734	0.803034	0.845093	0.930813	0.739783	0.873312	0.876651	0.742364	0.758181	0.364127	0.735087	0.78358	0.83643
0.559854	0.455797	0.908943	0.221156	0.869863	0.116954	0.403396	0.0551423	0.213685	0.0316402	0.831467	0.488861	0.920556	0.0901615	0.689831	0.504606	0.94007	0.925661	0.888606	0.906194	0.876529	0.768229	0.829874	0.815995	0.845893	0.880311	0.698427	0.905896	0.824475	0.172243	0.792426	0.286995	0.804031	0.765885	0.71843	0.891462	0.0416835	0.598038	0.754679	0.842354	0.933692	0.745135	0.882741	0.838195	0.741796	0.752367	0.376288	0.851736	0.723034	0.652046
0.462054	0.48909	0.842241	0.252753	0.825181	0.14213	0.39406	0.0698436	0.265794	0.0528323	0.837515	0.330536	0.886864	0.113709	0.645449	0.613672	0.911196	0.932371	0.817477	0.862914	0.885458	0.748235	0.783464	0.791255	0.756439	0.815929	0.64259	0.866146	0.849201	0.186785	0.841059	0.29518	0.777862	0.690424	0.752484	0.840513	0.0498823	0.623394	0.838742	0.79434	0.876866	0.672649	0.870827	0.764501	0.722143	0.669571	0.371763	0.914907	0.765962	0.793516
0.482019	0.367768	0.854513	0.315046	0.770397	0.15734	0.457169	0.080002	0.278064	0.0498391	0.793771	0.907396	0.918026	0.0953749	0.648955	0.584506	0.939189	0.912005	0.854342	0.904002	0.748602	0.776669	0.872809	0.748832	0.772577	0.833091	0.64046	0.887961	0.810352	0.289636	0.789418	0.300713	0.766499	0.840881	0.743684	0.83653	0.0367992	0.589624	0.847687	0.800744	0.941375	0.643264	0.887071	0.855628	0.723896	0.764458	0.322313	0.84186	0.79175	0.861008
0.42855	0.356404	0.863795	0.271473	0.812669	0.166405	0.460613	0.0576586	0.278821	0.0401494	0.74625	0.918177	0.896973	0.14321	0.643091	0.429391	0.886229	0.898197	0.797452	0.885737	0.890043	0.731551	0.891033	0.782211	0.739337	0.835412	0.688785	0.865629	0.803326	0.246376	0.79838	0.309993	0.771156	0.776831	0.813905	0.825727	0.0917557	0.495834	0.843646	0.804268	0.918398	0.668007	0.857606	0.8445	0.608528	0.788115	0.269703	0.78853	0.779559	0.808259
0.507102	0.529705	0.882691	0.313635	0.823865	0.159627	0.456213	0.0778423	0.261889	0.0827221	0.765791	0.928682	0.891982	0.214966	0.574531	0.549175	0.927252	0.932516	0.791282	0.873077	0.795487	0.730365	0.843652	0.800094	0.722028	0.813462	0.675885	0.885977	0.812964	0.225026	0.824366	0.293933	0.767306	0.704221	0.796946	0.837105	0.0830836	0.646033	0.841675	0.825464	0.907025	0.678209	0.843351	0.812784	0.685872	0.755045	0.303567	0.851641	0.76264	0.779775
0.445521	0.474397	0.889221	0.335224	0.829508	0.168019	0.394042	0.056139	0.274715	0.0308122	0.823912	0.927497	0.924772	0.0811505	0.666899	0.365763	0.93956	0.925664	0.834284	0.923492	0.873172	0.812185	0.860979	0.822948	0.755178	0.849819	0.6428	0.876407	0.847639	0.205921	0.798109	0.272537	0.791567	0.781706	0.727671	0.812637	0.0596736	0.666383	0.823337	0.859554	0.969183	0.670772	0.865237	0.756825	0.726992	0.755073	0.297993	0.862653	0.778343	0.843222
0.437908	0.473597	0.881729	0.163568	0.851542	0.142413	0.38021	0.0496899	0.259882	0.0430671	0.87591	0.883916	0.944952	0.104405	0.685015	0.572036	0.944909	0.941143	0.877625	0.904522	0.845381	0.804011	0.901791	0.834231	0.800407	0.864534	0.653417	0.889513	0.859913	0.231339	0.817118	0.335312	0.82241	0.744105	0.818717	0.794429	0.0494356	0.595933	0.857476	0.823174	0.925874	0.75202	0.900363	0.857893	0.758061	0.761251	0.364504	0.828005	0.787082	0.821777
0.428055	0.455531	0.851626	0.218264	0.837993	0.16499	0.488024	0.0674148	0.260153	0.0495523	0.832428	0.897653	0.900554	0.116874	0.663926	0.414008	0.943219	0.897476	0.823652	0.886536	0.854028	0.798985	0.861	0.788384	0.763627	0.840707	0.653019	0.867525	0.796208	0.33344	0.791374	0.308429	0.772995	0.793619	0.669911	0.797784	0.0678347	0.571077	0.807348	0.802153	0.914656	0.681475	0.868799	0.837931	0.705386	0.686327	0.379569	0.824174	0.765744	0.815054
0.498816	0.509487	0.83922	0.236745	0.786905	0.184851	0.429561	0.0462796	0.262958	0.0507378	0.797919	0.909059	0.904544	0.140267	0.636977	0.393663	0.920057	0.907592	0.851667	0.889251	0.837226	0.738051	0.895479	0.792029	0.781093	0.811596	0.642943	0.890634	0.813758	0.30861	0.793898	0.329648	0.797356	0.807793	0.781775	0.788839	0.0714896	0.647699	0.824702	0.830335	0.942782	0.699454	0.839785	0.773221	0.719688	0.760276	0.371915	0.85082	0.793054	0.753204
0.453928	0.518784	0.871638	0.248713	0.846938	0.144173	0.404706	0.0568145	0.266478	0.038054	0.797356	0.910236	0.909085	0.10852	0.637447	0.549121	0.922739	0.93755	0.877509	0.887413	0.830371	0.76178	0.88378	0.803738	0.774772	0.824221	0.645399	0.878961	0.841254	0.31716	0.789296	0.316215	0.780611	0.788809	0.743534	0.875002	0.0395985	0.647072	0.832246	0.814759	0.915247	0.640034	0.846312	0.831653	0.662519	0.772451	0.404008	0.866026	0.801379	0.815125
0.455817	0.503681	0.875908	0.155084	0.798365	0.163585	0.398226	0.0731364	0.276201	0.0365809	0.815586	0.926177	0.908163	0.103739	0.684823	0.574031	0.943136	0.937825	0.787004	0.936251	0.863275	0.802766	0.767593	0.803633	0.827663	0.87046	0.654212	0.908453	0.83214	0.262687	0.80091	0.316409	0.81866	0.779545	0.776963	0.880937	0.0287742	0.676307	0.819556	0.834694	0.940757	0.676277	0.902987	0.85432	0.713559	0.720826	0.392798	0.798282	0.794768	0.847237
0.464066	0.521109	0.872281	0.239794	0.844797	0.20425	0.516841	0.0712643	0.268548	0.0434629	0.787023	0.92152	0.900331	0.0888478	0.61206	0.595465	0.941799	0.934394	0.748993	0.792813	0.779359	0.807857	0.876618	0.808396	0.761676	0.854119	0.72879	0.876016	0.819211	0.174886	0.784494	0.322791	0.736588	0.664755	0.65685	0.852165	0.0473581	0.655585	0.776336	0.833826	0.894317	0.668239	0.872139	0.683425	0.705668	0.731823	0.257916	0.894011	0.797481	0.826456
0.44157	0.500029	0.887477	0.256146	0.874761	0.144533	0.457003	0.0342851	0.251251	0.0311422	0.838862	0.924634	0.916375	0.112746	0.635073	0.663219	0.917919	0.938885	0.693909	0.863775	0.828709	0.795221	0.81153	0.814744	0.822094	0.883912	0.735588	0.908629	0.88464	0.195405	0.776832	0.303179	0.76457	0.806302	0.750422	0.880768	0.03391	0.618833	0.770029	0.866364	0.88192	0.703016	0.908523	0.859008	0.807608	0.793415	0.260447	0.937232	0.717354	0.851552
0.339191	0.522708	0.914435	0.15035	0.855548	0.147718	0.422998	0.0417433	0.237979	0.032648	0.923413	0.935913	0.919874	0.0828273	0.740664	0.494322	0.906866	0.956491	0.673022	0.887958	0.804075	0.823147	0.770935	0.870257	0.79066	0.934267	0.705255	0.909624	0.858549	0.238181	0.739006	0.280681	0.720926	0.679846	0.581644	0.891197	0.0278248	0.624871	0.768931	0.872815	0.923727	0.757153	0.89319	0.883819	0.733676	0.81271	0.276957	0.882242	0.708801	0.74699
0.344611	0.406082	0.870771	0.185894	0.839932	0.147589	0.395664	0.0371426	0.236227	0.0344774	0.855628	0.923417	0.926983	0.0697604	0.644951	0.572839	0.918723	0.960929	0.774661	0.839308	0.772734	0.785555	0.869769	0.798944	0.81831	0.905705	0.667924	0.890131	0.885006	0.245687	0.76755	0.307429	0.749268	0.692817	0.634446	0.794516	0.0455837	0.582836	0.773608	0.831406	0.86994	0.720563	0.879365	0.854103	0.757947	0.738562	0.229947	0.867449	0.695109	0.749502
0.451926	0.489849	0.851231	0.268844	0.819681	0.189181	0.488596	0.0833172	0.27999	0.0628397	0.787117	0.913303	0.875232	0.100009	0.584482	0.545934	0.91397	0.903745	0.767862	0.862582	0.89644	0.737736	0.780496	0.800113	0.727373	0.885654	0.674855	0.89173	0.844219	0.384177	0.72911	0.299346	0.669815	0.743566	0.761591	0.831824	0.067737	0.597761	0.709751	0.839982	0.887505	0.595441	0.831268	0.813435	0.657862	0.764563	0.3232	0.907271	0.656713	0.742312
0.404406	0.421252	0.876618	0.206833	0.838813	0.172226	0.490536	0.048771	0.254276	0.0242122	0.836446	0.931123	0.895036	0.105278	0.69466	0.39518	0.896185	0.93585	0.78652	0.854869	0.877411	0.823558	0.788378	0.810753	0.792152	0.879918	0.655042	0.887167	0.859173	0.199712	0.712037	0.268103	0.723105	0.676436	0.719434	0.86971	0.0556639	0.61129	0.748011	0.828298	0.86445	0.679657	0.870012	0.867176	0.715146	0.729099	0.384253	0.848287	0.751447	0.74201
0.433336	0.463375	0.888989	0.221606	0.803807	0.163424	0.461439	0.0807461	0.247886	0.0330658	0.843584	0.921715	0.922976	0.0993762	0.652779	0.508757	0.921145	0.946896	0.731698	0.826341	0.73924	0.805988	0.837497	0.822064	0.80507	0.886287	0.643825	0.885569	0.830357	0.218581	0.7473	0.325527	0.761806	0.685432	0.784607	0.858317	0.0567333	0.586191	0.75988	0.878724	0.88538	0.713928	0.880188	0.801727	0.734713	0.703085	0.339485	0.867322	0.659994	0.738049
0.555125	0.494535	0.883267	0.243947	0.792936	0.182725	0.424416	0.0876317	0.278532	0.0251292	0.789935	0.918987	0.908374	0.140026	0.602454	0.608421	0.95277	0.935038	0.783991	0.91793	0.880664	0.766921	0.858832	0.814289	0.766543	0.874859	0.705748	0.87464	0.860086	0.272365	0.759445	0.282898	0.690503	0.837547	0.757201	0.876346	0.0573702	0.677814	0.766808	0.843654	0.902316	0.663171	0.849946	0.853731	0.683702	0.754109	0.347058	0.906433	0.742428	0.761792
0.423247	0.434952	0.874049	0.370507	0.824633	0.191266	0.486787	0.0595793	0.261086	0.0564102	0.820396	0.931295	0.907357	0.0929921	0.61779	0.519993	0.912045	0.932239	0.692548	0.866032	0.878076	0.807769	0.84847	0.805653	0.772123	0.881186	0.679906	0.8966	0.829984	0.109595	0.7815	0.320355	0.72411	0.572698	0.832965	0.851966	0.0368626	0.482242	0.702042	0.837517	0.881262	0.662913	0.85668	0.855482	0.685995	0.759271	0.349982	0.845009	0.744047	0.815783
0.462031	0.518158	0.909055	0.230022	0.848639	0.151007	0.569575	0.0430039	0.266809	0.0233343	0.840532	0.939043	0.920458	0.110408	0.66813	0.496432	0.952224	0.948286	0.806713	0.880109	0.783931	0.789162	0.852925	0.820304	0.824274	0.90364	0.681022	0.914935	0.855153	0.275422	0.774558	0.284206	0.749505	0.705387	0.679511	0.899248	0.0533887	0.662272	0.797213	0.854499	0.89365	0.718858	0.87245	0.887137	0.695898	0.793817	0.245994	0.906773	0.705051	0.808992
0.420472	0.487929	0.927084	0.255309	0.818974	0.136612	0.32792	0.0379778	0.204052	0.0239746	0.751973	0.943107	0.879966	0.0682368	0.589866	0.658706	0.892934	0.933792	0.679389	0.866498	0.841529	0.743389	0.652502	0.810767	0.751933	0.869459	0.670948	0.919104	0.799443	0.185119	0.73162	0.252855	0.658552	0.698672	0.692756	0.865409	0.0427107	0.517757	0.786592	0.842704	0.877029	0.638829	0.84283	0.719727	0.675897	0.766015	0.331217	0.91578	0.676643	0.808332
0.534375	0.581526	0.83793	0.328607	0.839816	0.173974	0.460906	0.0514316	0.285761	0.0517793	0.788006	0.932677	0.902007	0.117698	0.632863	0.4405	0.859837	0.927163	0.744064	0.759998	0.691351	0.741282	0.734425	0.790469	0.712021	0.858679	0.67389	0.887683	0.844799	0.260347	0.751666	0.292381	0.671602	0.65897	0.708544	0.860121	0.0637614	0.600506	0.718721	0.828666	0.884294	0.537218	0.79472	0.885942	0.668902	0.728031	0.295815	0.90786	0.722919	0.722781
0.4004	0.436181	0.890505	0.235369	0.874845	0.171945	0.441271	0.0327461	0.22292	0.02608	0.889992	0.892071	0.924551	0.072146	0.59957	0.539183	0.94521	0.952139	0.774375	0.844464	0.800789	0.795775	0.840445	0.838282	0.786175	0.929139	0.672105	0.893839	0.875058	0.12632	0.759829	0.336787	0.737811	0.812731	0.739477	0.864252	0.0303744	0.588293	0.753563	0.882346	0.900347	0.704574	0.886775	0.88762	0.743312	0.743659	0.196747	0.885031	0.731081	0.761647
0.508612	0.508926	0.878923	0.337919	0.813894	0.181653	0.49014	0.0288134	0.266352	0.0178178	0.845279	0.920286	0.912947	0.0757585	0.643557	0.529613	0.942658	0.948768	0.802766	0.831959	0.758408	0.792941	0.777912	0.851531	0.768954	0.891949	0.652332	0.887162	0.862244	0.288646	0.769997	0.334601	0.681962	0.681263	0.800204	0.856848	0.0430013	0.544764	0.87514	0.830302	0.885634	0.732635	0.869022	0.712315	0.732145	0.761553	0.295233	0.886164	0.687287	0.739678
0.444832	0.498909	0.887141	0.115499	0.824393	0.147062	0.420325	0.0344983	0.259578	0.0329355	0.894003	0.896883	0.915044	0.0508094	0.71674	0.496651	0.928295	0.946993	0.842487	0.825137	0.887689	0.769694	0.825923	0.865582	0.785394	0.90688	0.648935	0.88938	0.866847	0.126811	0.721041	0.287239	0.743663	0.579108	0.721288	0.866024	0.0486714	0.64844	0.796141	0.82925	0.901507	0.77992	0.881063	0.852565	0.741318	0.682023	0.277529	0.879555	0.70358	0.730978
[truncated: 307 more rows]
[truncated: 411 more columns]

## Sheet: 17 cyt least reg in young
Name	AddressA_ID	AlleleA_ProbeSeq	AddressB_ID	AlleleB_ProbeSeq	Infinium_Design_Type	Next_Base	Color_Channel	Forward_Sequence	Genome_Build	CHR	MAPINFO	SourceSeq	Chromosome_36	Coordinate_36	Strand	Probe_SNPs	Probe_SNPs_10	Random_Loci	Methyl27_Loci	UCSC_RefGene_Name	UCSC_RefGene_Accession	UCSC_RefGene_Group	UCSC_CpG_Islands_Name	Relation_to_UCSC_CpG_Island	Phantom	DMR	Enhancer	HMM_Island	Regulatory_Feature_Name	Regulatory_Feature_Group	DHS
[truncated: 17 more rows]

[truncated: 8 more sheets: 13 cyt least reg in young, 8 cyt most ref in young, 5 cyt most reg in young, 50 cyt, Summary of overlapping cyt, Overlap with 143K cyt, Overlap with Hammum&Phenoage, Batch effects test]
